# Supplementary material for: Assessing the Biological Mechanisms Linking Smoking Behavior and Cognitive Function: A Mediation Analysis of Untargeted Metabolomics
Source: MDPI journal article supplement (doi:10.3390/metabo13111154), 2023-11-16
Supplement: s1 [file s1]

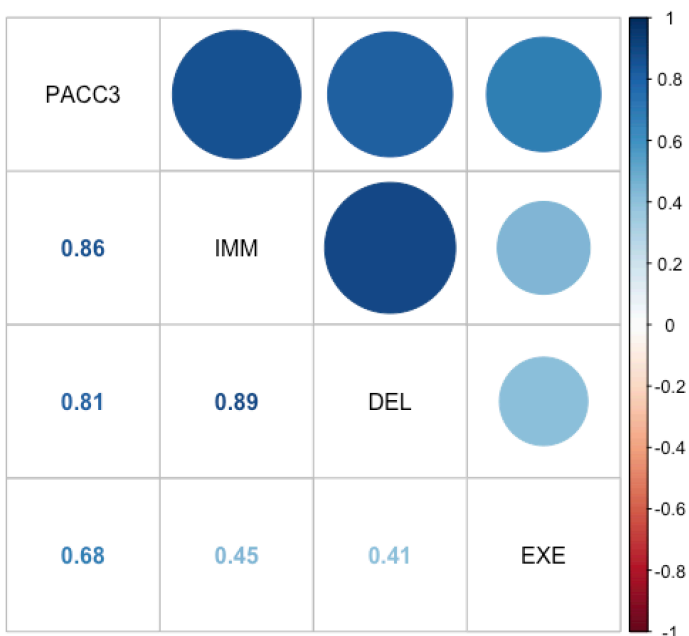

**Supplementary Figure S1. Correlations between cognitive composite scores.** Blue circles indicate positive correlations while red circles indicate negative correlations. The size of the circle corresponds to the degree of correlation. PACC3: 3-test Preclinical Alzheimer Cognitive Composite; IMM: Immediate Learning; DEL: Delayed Recall; EXE: Executive Function.

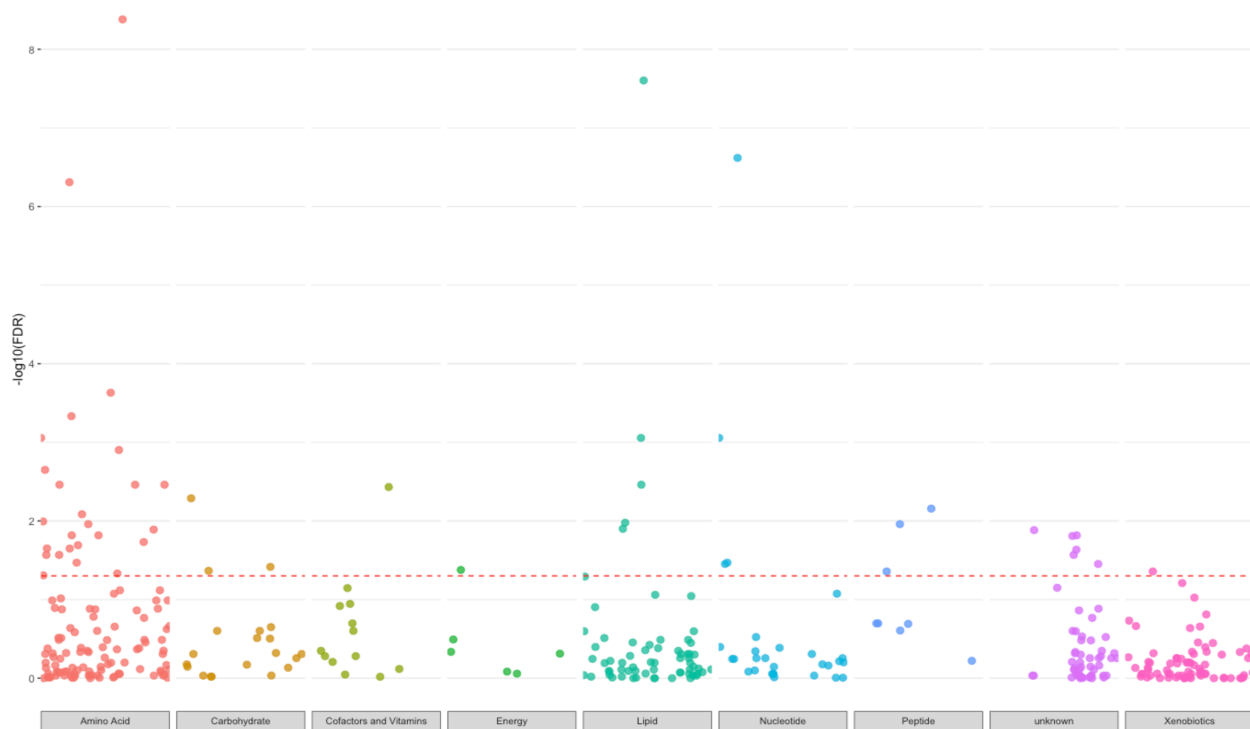

**Supplementary Figure S2. Manhattan plot of the associations between smoking status and CSF metabolites.** Each linear mixed model included a random intercept for the individual and a random slope for age. The outcome was a metabolite and smoking status, sex, race, education level, practice effect, linear and quadratic terms for age, CES-D, BMI, and weekly alcohol consumption were adjusted for. Each dot represents a metabolite. The y-axis is the  $-\log_{10}$  of the FDR-adjusted p-value for the association between smoking status and the CSF metabolite. The metabolites are categorized by super pathway, displayed on the x-axis (metabolites in the unknown category are novel metabolites that are not in existing databases).

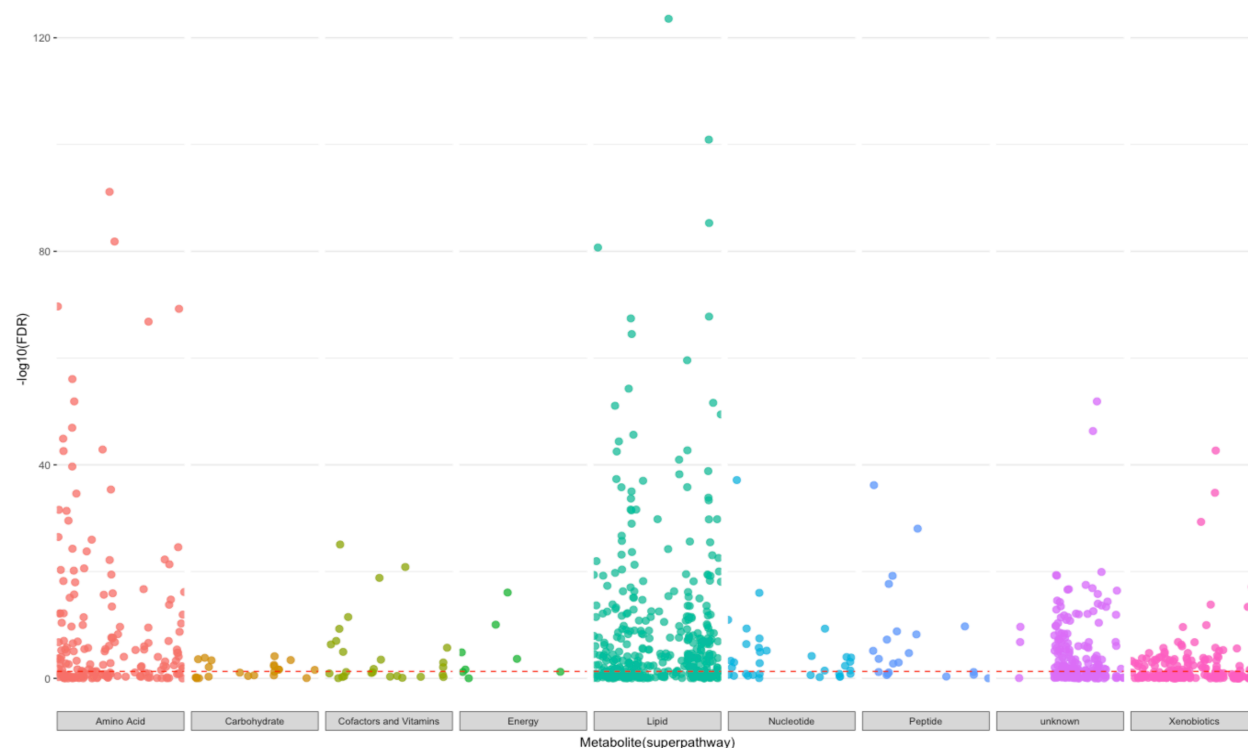

**Supplementary Figure S3. Manhattan plot of the associations between smoking status and plasma metabolites.** Each linear mixed model included a random intercept for family and individual and a random slope for age. The outcome was a metabolite and smoking status, sex, race, education level, practice effect, linear and quadratic terms for age, CES-D, BMI, and weekly alcohol consumption were adjusted for. Each dot represents a metabolite. The y-axis is the  $-\log_{10}$  of the FDR-adjusted p-value for the association between smoking status and the plasma metabolite. The metabolites are categorized by super pathway, displayed on the x-axis (metabolites in the unknown category are novel metabolites that are not in existing databases).
