# Supplementary material for: Assessing the Biological Mechanisms Linking Smoking Behavior and Cognitive Function: A Mediation Analysis of Untargeted Metabolomics
Source: Metabolites. 2023 Nov 16;13(11):1154. doi: 10.3390/metabo13111154 (PMC10673384; doi:10.3390/metabo13111154)
Supplement: Supplementary file 1 [file metabolites-13-01154-s001.zip]

Archive with 4 entries (4 files):
- Supplemental Table S1.xlsx
- Supplemental Table S2.xlsx
- Supplemental Table S3.xlsx
- Supplementary Figures_Final.pdf
