# Supplementary material for: Assessing the Biological Mechanisms Linking Smoking Behavior and Cognitive Function: A Mediation Analysis of Untargeted Metabolomics
Source: Metabolites. 2023 Nov 16;13(11):1154. doi: 10.3390/metabo13111154 (PMC10673384; doi:10.3390/metabo13111154)
Supplement: Supplementary file 1 [file metabolites-13-01154-s001.zip › Supplemental Table S1.xlsx]

## Sheet: Sheet1
Supplementary Table S1. Linear mixed model analysis of the association between smoking status and cognitive function in the WRAP sample (Full and reduced models, n = 1,266).
	Pacc3-Reduced Model				Pacc3-Full Model				Immediate learning-Reduced Model				Immediate learning- Full Model				Delayed recall-Reduced Model				Delayed recall- Full Model				Executive function-Reduced Model				Executive function-Full Model
Predictors	Estimates	std. Error	CI	p	Estimates	std. Error	CI	p	Estimates	std. Error	CI	p	Estimates	std. Error	CI	p	Estimates	std. Error	CI	p	Estimates	std. Error	CI	p	Estimates	std. Error	CI	p	Estimates	std. Error	CI	p
Intercept	-1.1	0.09	-1.28 – -0.92	<0.001	-1.1	0.1	-1.28 – -0.91	<0.001	-0.96	0.1	-1.15 – -0.77	<0.001	-0.96	0.1	-1.15 – -0.76	<0.001	-0.89	0.1	-1.08 – -0.70	<0.001	-0.88	0.1	-1.08 – -0.68	<0.001	-1.13	0.1	-1.33 – -0.93	<0.001	-1.06	0.1	-1.26 – -0.86	<0.001
Gender	0.51	0.04	0.43 – 0.58	<0.001	0.53	0.04	0.45 – 0.61	<0.001	0.42	0.04	0.34 – 0.50	<0.001	0.44	0.04	0.36 – 0.52	<0.001	0.37	0.04	0.29 – 0.45	<0.001	0.39	0.04	0.31 – 0.47	<0.001	0.33	0.04	0.24 – 0.41	<0.001	0.35	0.04	0.27 – 0.44	<0.001
Race	0.42	0.08	0.26 – 0.59	<0.001	0.4	0.08	0.24 – 0.56	<0.001	0.38	0.09	0.20 – 0.55	<0.001	0.35	0.09	0.18 – 0.53	<0.001	0.35	0.09	0.17 – 0.52	<0.001	0.33	0.09	0.15 – 0.50	<0.001	0.6	0.09	0.42 – 0.79	<0.001	0.55	0.09	0.37 – 0.73	<0.001
Education level	0.37	0.04	0.30 – 0.45	<0.001	0.37	0.04	0.30 – 0.45	<0.001	0.36	0.04	0.28 – 0.43	<0.001	0.36	0.04	0.28 – 0.43	<0.001	0.36	0.04	0.28 – 0.43	<0.001	0.36	0.04	0.28 – 0.44	<0.001	0.27	0.04	0.19 – 0.35	<0.001	0.27	0.04	0.19 – 0.35	<0.001
Former smoker	0.06	0.04	-0.02 – 0.13	0.133	0.05	0.04	-0.02 – 0.13	0.159	0.03	0.04	-0.05 – 0.11	0.44	0.03	0.04	-0.05 – 0.10	0.524	0.06	0.04	-0.02 – 0.14	0.124	0.06	0.04	-0.02 – 0.14	0.151	0.03	0.04	-0.05 – 0.11	0.522	0.02	0.04	-0.06 – 0.10	0.557
Current smoker	-0.39	0.07	-0.53 – -0.25	<0.001	-0.38	0.07	-0.53 – -0.24	<0.001	-0.36	0.08	-0.52 – -0.21	<0.001	-0.36	0.08	-0.51 – -0.21	<0.001	-0.36	0.08	-0.52 – -0.21	<0.001	-0.36	0.08	-0.51 – -0.21	<0.001	-0.28	0.08	-0.43 – -0.12	0.001	-0.27	0.08	-0.42 – -0.12	0.001
Age(poly term1)	-0.05	0	-0.05 – -0.04	<0.001	-0.05	0	-0.05 – -0.04	<0.001	-0.04	0	-0.04 – -0.03	<0.001	-0.04	0	-0.04 – -0.03	<0.001	-0.03	0	-0.04 – -0.03	<0.001	-0.04	0	-0.04 – -0.03	<0.001	-0.06	0	-0.07 – -0.05	<0.001	-0.06	0	-0.07 – -0.05	<0.001
Age(poly term2)	0	0	-0.00 – -0.00	<0.001	0	0	-0.00 – -0.00	<0.001	0	0	-0.00 – -0.00	<0.001	0	0	-0.00 – -0.00	<0.001	0	0	-0.00 – -0.00	<0.001	0	0	-0.00 – -0.00	<0.001	0	0	-0.00 – -0.00	<0.001	0	0	-0.00 – -0.00	<0.001
Practice Effect	0.08	0.01	0.07 – 0.10	<0.001	0.08	0.01	0.07 – 0.10	<0.001	0.12	0.01	0.11 – 0.14	<0.001	0.12	0.01	0.11 – 0.14	<0.001	0.12	0.01	0.10 – 0.13	<0.001	0.12	0.01	0.10 – 0.13	<0.001	0.07	0.01	0.06 – 0.09	<0.001	0.07	0.01	0.06 – 0.09	<0.001
CES-D					0	0	-0.01 – -0.00	<0.001					0	0	-0.01 – -0.00	0.001					0	0	-0.01 – -0.00	0.005					-0.01	0	-0.01 – -0.01	<0.001
BMI(underweight)					-0.24	0.09	-0.42 – -0.06	0.011					-0.16	0.11	-0.37 – 0.06	0.151					-0.09	0.11	-0.30 – 0.12	0.41					-0.17	0.09	-0.35 – 0.01	0.06
BMI(overweight)					0	0.02	-0.04 – 0.05	0.855					0.01	0.03	-0.04 – 0.07	0.691					0	0.03	-0.05 – 0.05	0.984					0	0.02	-0.04 – 0.05	0.858
BMI(obese)					0.03	0.03	-0.03 – 0.09	0.27					0.04	0.03	-0.03 – 0.10	0.244					0.03	0.03	-0.04 – 0.09	0.441					-0.03	0.03	-0.08 – 0.03	0.358
Alcohol Weekly Consumption					0	0	0.00 – 0.01	0.002					0.01	0	0.00 – 0.01	0.004					0	0	0.00 – 0.01	0.034					0.01	0	0.00 – 0.01	<0.001
Random Effects
σ2	0.1				0.1				0.15				0.15				0.14				0.14				0.09				0.09
τ00	0.28 family:DBID				0.28 family:DBID				0.29 family:DBID				0.29 family:DBID				0.29 family:DBID				0.29 family:DBID				0.32 family:DBID				0.31 family:DBID
	0.06 family				0.06 family				0.07 family				0.07 family				0.08 family				0.08 family				0.12 family				0.12 family
τ11	0.00 family:DBID.age				0.00 family:DBID.age				0.00 family:DBID.age				0.00 family:DBID.age				0.00 family:DBID.age				0.00 family:DBID.age				0.00 family:DBID.age				0.00 family:DBID.age
ρ01	0.19 family:DBID				0.19 family:DBID				0.18 family:DBID				0.17 family:DBID				0.21 family:DBID				0.21 family:DBID				0.31 family:DBID				0.33 family:DBID
ICC	0.78				0.78				0.71				0.71				0.73				0.73				0.84				0.83
N	1007 family				1007 family				1007 family				1007 family				1007 family				1007 family				1007 family				1007 family
	1266 DBID				1266 DBID				1266 DBID				1266 DBID				1266 DBID				1266 DBID				1266 DBID				1266 DBID
Observations	4680				4680				4680				4680				4680				4680				4680				4680
Marginal R2 / Conditional R2	0.293 / 0.845				0.298 / 0.844				0.212 / 0.774				0.216 / 0.773				0.192 / 0.780				0.194 / 0.779				0.275 / 0.882				0.283 / 0.881
Abbreviations: SE, standard error, ICC, intraclass correlation coefficient, correlation among observations within the sibling group and repeated measures within an individual; DBID, WRAP coded database ID number. Marginal R2 indicates the variance explained only by fixed effects and conditional R2 indicates the variance explained by both fixed and random effects.
