# Supplementary material for: Assessing the Biological Mechanisms Linking Smoking Behavior and Cognitive Function: A Mediation Analysis of Untargeted Metabolomics
Source: Metabolites. 2023 Nov 16;13(11):1154. doi: 10.3390/metabo13111154 (PMC10673384; doi:10.3390/metabo13111154)
Supplement: Supplementary file 1 [file metabolites-13-01154-s001.zip › Supplemental Table S2.xlsx]

## Sheet: CSF
Supplementary Table S2. Associations between smoking status and metabolomics. Each linear mixed model included a random intercept for the individual and a random slope for age. The outcome was a metabolite and smoking status, sex, race, education level, practice effect.
and linear, and quadratic terms for age were predictive variables. Also, we adjusted for CES-D, BMI, and weekly alcohol consumption.
Metabolite ID	Biochemical name	Super-pathway	Sub-pathway	Comp ID	Chemical ID	HMDB ID	Estimate	SE	p-value	Bonferroni p-value	FDR p-value
met46225	pyroglutamine*	Amino Acid	Glutamate Metabolism	46225	100001540		-0.22179	0.0302628	1.07e-11	4.17e-09	4.17e-09
met37202	androstenediol (3beta,17beta) disulfate (1)	Lipid	Androgenic Steroids	37202	100001992	HMDB03818	-0.651994	0.0947919	1.28e-10	4.99e-08	2.49e-08
met1604	urate	Nucleotide	Purine Metabolism, (Hypo)Xanthine/Inosine containing	1604	1134	HMDB00289	-0.142871	0.0224289	1.85e-09	7.22e-07	2.41e-07
met2125	taurine	Amino Acid	Methionine, Cysteine, SAM and Taurine Metabolism	2125	512	HMDB00251	0.0853227	0.0137761	5.03e-09	1.96e-06	4.91e-07
met42370	S-1-pyrroline-5-carboxylate	Amino Acid	Glutamate Metabolism	42370	35	HMDB01301	-0.106937	0.022094	3e-06	0.00116835	0.00023367
met22132	alpha-hydroxyisocaproate	Amino Acid	Leucine, Isoleucine and Valine Metabolism	22132	100000706	HMDB00746	-0.0982444	0.0211417	7.15e-06	0.00278817	0.000464695
met1101	homovanillate (HVA)	Amino Acid	Tyrosine Metabolism	1101	117	HMDB00118	0.113351	0.0256055	1.86e-05	0.00723747	0.000878482
met1107	allantoin	Nucleotide	Purine Metabolism, (Hypo)Xanthine/Inosine containing	1107	1002	HMDB00462	-0.111392	0.0251025	1.75e-05	0.00680783	0.000878482
met36747	deoxycarnitine	Lipid	Carnitine Metabolism	36747	100001662	HMDB01161	-0.114049	0.0256036	2.03e-05	0.00790634	0.000878482
met44618	3-methoxytyramine sulfate	Amino Acid	Tyrosine Metabolism	44618	100004634		0.125017	0.02916	3.21e-05	0.0125152	0.00125152
met12129	beta-hydroxyisovalerate	Amino Acid	Leucine, Isoleucine and Valine Metabolism	12129	1442	HMDB00754	-0.0796848	0.0193875	6.32e-05	0.0246372	0.00223975
met1591	N-acetylvaline	Amino Acid	Leucine, Isoleucine and Valine Metabolism	1591	1084	HMDB11757	0.0669152	0.0170525	0.000133035	0.0518838	0.00345892
met36776	7-alpha-hydroxy-3-oxo-4-cholestenoate (7-Hoca)	Lipid	Sterol	36776	100001609	HMDB12458	-0.0926501	0.0234862	0.00012343	0.0481375	0.00345892
met48187	N-acetyltaurine	Amino Acid	Methionine, Cysteine, SAM and Taurine Metabolism	48187	100005466		0.0875212	0.0219731	0.000111029	0.0433012	0.00345892
met60	leucine	Amino Acid	Leucine, Isoleucine and Valine Metabolism	60	397	HMDB00687	-0.058882	0.0150022	0.00012715	0.0495884	0.00345892
met43807	bilirubin (Z,Z)	Cofactors and Vitamins	Hemoglobin and Porphyrin Metabolism	43807	1090	HMDB00054	-0.174212	0.0448019	0.000151818	0.0592091	0.00370057
met1572	glycerate	Carbohydrate	Glycolysis, Gluconeogenesis, and Pyruvate Metabolism	1572	1052	HMDB00139	0.0327412	0.00867433	0.000224495	0.087553	0.00515018
met43829	gamma-glutamylvaline	Peptide	Gamma-glutamyl Amino Acid	43829	100001126	HMDB11172	-0.104887	0.0285028	0.000321482	0.125378	0.00696544
met32397	3-hydroxy-2-ethylpropionate	Amino Acid	Leucine, Isoleucine and Valine Metabolism	32397	100001170	HMDB00396	-0.0737463	0.0203488	0.000400144	0.156056	0.00821348
met1125	isoleucine	Amino Acid	Leucine, Isoleucine and Valine Metabolism	1125	376	HMDB00172	-0.0640203	0.0180856	0.000520474	0.202985	0.0101492
met32452	propionylcarnitine (C3)	Lipid	Fatty Acid Metabolism (also BCAA Metabolism)	32452	100001162	HMDB00824	-0.0928201	0.0263965	0.000567093	0.221166	0.0105317
met33364	gamma-glutamylthreonine	Peptide	Gamma-glutamyl Amino Acid	33364	100001314	HMDB29159	-0.076771	0.0220393	0.000647643	0.252581	0.0109818
met33937	alpha-hydroxyisovalerate	Amino Acid	Leucine, Isoleucine and Valine Metabolism	33937	100001300	HMDB00407	-0.100024	0.0286759	0.00062514	0.243805	0.0109818
met32198	acetylcarnitine (C2)	Lipid	Fatty Acid Metabolism(Acyl Carnitine)	32198	100000802	HMDB00201	-0.0927207	0.0270169	0.000774864	0.302197	0.0125915
met53	glutamine	Amino Acid	Glutamate Metabolism	53	563	HMDB00641	-0.0289487	0.0084892	0.000825965	0.322126	0.0128851
met33140	X - 11795			33140			-0.129702	0.0382482	0.00087208	0.340111	0.0130812
met22137	homoarginine	Amino Acid	Urea cycle; Arginine and Proline Metabolism	22137	100000961	HMDB00670	-0.0910835	0.0272565	0.00105378	0.410973	0.0152212
met36746	2-hydroxy-3-methylvalerate	Amino Acid	Leucine, Isoleucine and Valine Metabolism	36746	100001541	HMDB00317	-0.0796511	0.0240287	0.00113322	0.441957	0.0152399
met46902	X - 21733			46902			0.222129	0.0668326	0.00113214	0.441533	0.0152399
met46295	X - 21286			46295			0.127244	0.0384891	0.00119373	0.465554	0.0155185
met5086	dimethylglycine	Amino Acid	Glycine, Serine and Threonine Metabolism	5086	806	HMDB00092	-0.119445	0.0369217	0.00147297	0.574458	0.0185309
met3141	betaine	Amino Acid	Glycine, Serine and Threonine Metabolism	3141	799	HMDB00043	-0.0561279	0.0175417	0.00167007	0.651329	0.020354
met1417	kynurenate	Amino Acid	Tryptophan Metabolism	1417	98	HMDB00715	0.200284	0.0633835	0.00189137	0.737634	0.0223525
met2132	citrulline	Amino Acid	Urea cycle; Arginine and Proline Metabolism	2132	391	HMDB00904	-0.0530513	0.0168306	0.00195411	0.762101	0.0224147
met46898	X - 21729			46898			0.0675086	0.0215934	0.00208286	0.812317	0.0232091
met1302	methionine	Amino Acid	Methionine, Cysteine, SAM and Taurine Metabolism	1302	415	HMDB00696	-0.0392406	0.0128369	0.0026338	1	0.0270312
met1589	N-acetylmethionine	Amino Acid	Methionine, Cysteine, SAM and Taurine Metabolism	1589	1083	HMDB11745	0.105289	0.0344052	0.00261686	1	0.0270312
met46610	X - 12007			46610			-0.210957	0.0686429	0.00252862	0.986161	0.0270312
met1505	orotate	Nucleotide	Pyrimidine Metabolism, Orotate containing	1505	445	HMDB00226	0.0704764	0.0237264	0.00344239	1	0.0339105
met2829	N-formylmethionine	Amino Acid	Methionine, Cysteine, SAM and Taurine Metabolism	2829	194	HMDB01015	0.0858229	0.0288988	0.003478	1	0.0339105
met1418	5,6-dihydrothymine	Nucleotide	Pyrimidine Metabolism, Thymine containing	1418	158	HMDB00079	-0.0462083	0.0156815	0.00371663	1	0.0352578
met52483	X - 24295			52483			-0.0850553	0.0288004	0.003797	1	0.0352578
met48153	mannose	Carbohydrate	Fructose, Mannose and Galactose Metabolism	48153	803	HMDB00169	-0.036555	0.0125954	0.00423498	1	0.0384103
met1564	citrate	Energy	TCA Cycle	1564	1124	HMDB00094	-0.0383453	0.0133771	0.00473582	1	0.0419766
met22250	pyruvate	Carbohydrate	Glycolysis, Gluconeogenesis, and Pyruvate Metabolism	22250	823	HMDB00243	-0.0952384	0.0333726	0.00496976	1	0.0430712
met20693	tartronate (hydroxymalonate)	Xenobiotics	Bacterial/Fungal	20693	100000840	HMDB35227	0.0637524	0.0225126	0.00528951	1	0.0438917
met2730	gamma-glutamylglutamine	Peptide	Gamma-glutamyl Amino Acid	2730	1140	HMDB11738	-0.0427358	0.0150855	0.00522366	1	0.0438917
met437	5-hydroxyindoleacetate	Amino Acid	Tryptophan Metabolism	437	71	HMDB00763	0.124873	0.0448336	0.00572746	1	0.0465356
met1126	alanine	Amino Acid	Alanine and Aspartate Metabolism	1126	811	HMDB00161	-0.0390068	0.0140485	0.00618618	1	0.0492369
met1124	myo-inositol	Lipid	Inositol Metabolism	1124	363	HMDB00211	0.0770076	0.0278937	0.00653712	1	0.0509895
met36095	thymol sulfate	Xenobiotics	Food Component/Plant	36095	100001757	HMDB01878	-0.649407	0.24175	0.00806578	1	0.0616795
met40097	X - 17299			40097			-0.125102	0.0476136	0.00943355	1	0.0707517
met27738	threonate	Cofactors and Vitamins	Ascorbate and Aldarate Metabolism	27738	100001022	HMDB00943	0.032058	0.0122214	0.00970315	1	0.0714005
met44878	methionine sulfone	Amino Acid	Methionine, Cysteine, SAM and Taurine Metabolism	44878	100004635		0.0758516	0.0292713	0.010577	1	0.0762487
met57	glutamate	Amino Acid	Glutamate Metabolism	57	561	HMDB00148	-0.0374189	0.0145029	0.010753	1	0.0762487
met43249	N-delta-acetylornithine	Amino Acid	Urea cycle; Arginine and Proline Metabolism	43249	100004523		0.193612	0.0761873	0.0120939	1	0.084201
met554	adenine	Nucleotide	Purine Metabolism, Adenine containing	554	880	HMDB00034	0.0373323	0.0147463	0.0123063	1	0.084201
met42978	dimethylmalonic acid	Lipid	Fatty Acid, Dicarboxylate	42978	100004251	HMDB02001	0.113916	0.045259	0.0129358	1	0.086982
met52478	1-(1-enyl-palmitoyl)-2-oleoyl-GPC (P-16:0/18:1)*	Lipid	Plasmalogen	52478	100009007		-0.0646084	0.0259026	0.0136571	1	0.0902759
met41888	succinimide	Xenobiotics	Chemical	41888	100003696		-0.424407	0.172443	0.0145438	1	0.0945349
met1648	serine	Amino Acid	Glycine, Serine and Threonine Metabolism	1648	503	HMDB00187	0.0262045	0.0106629	0.0151064	1	0.0965817
met1549	3-hydroxyisobutyrate	Amino Acid	Leucine, Isoleucine and Valine Metabolism	1549	111	HMDB00336	-0.0351456	0.0145437	0.0168362	1	0.102596
met54	tryptophan	Amino Acid	Tryptophan Metabolism	54	565	HMDB00929	-0.0302397	0.0124946	0.0167098	1	0.102596
met62103	cysteinylglycine disulfide*	Amino Acid	Glutathione Metabolism	62103	100002466	HMDB00709	-0.0436949	0.0180405	0.0165942	1	0.102596
met31555	pyridoxate	Cofactors and Vitamins	Vitamin B6 Metabolism	31555	100001121	HMDB00017	0.133928	0.056482	0.0189156	1	0.113493
met20694	oxalate (ethanedioate)	Cofactors and Vitamins	Ascorbate and Aldarate Metabolism	20694	100000841	HMDB02329	0.0400954	0.0171451	0.0204226	1	0.120679
met15500	carnitine	Lipid	Carnitine Metabolism	15500	100000007	HMDB00062	-0.0448132	0.0192909	0.0214415	1	0.124808
met15676	3-methyl-2-oxovalerate	Amino Acid	Leucine, Isoleucine and Valine Metabolism	15676	100000036	HMDB03736	-0.0382288	0.0165669	0.0222884	1	0.12783
met52525	X - 24329			52525			0.044231	0.0192722	0.0231609	1	0.130559
met54923	beta-citrylglutamate	Amino Acid	Glutamate Metabolism	54923	100003271		0.0512814	0.0224117	0.0234337	1	0.130559
met33950	N-acetylphenylalanine	Amino Acid	Phenylalanine Metabolism	33950	100001256	HMDB00512	0.0966726	0.0423042	0.0238458	1	0.130984
met1670	urea	Amino Acid	Urea cycle; Arginine and Proline Metabolism	1670	533	HMDB00294	-0.035071	0.0154872	0.0249378	1	0.133229
met35127	pro-hydroxy-pro	Amino Acid	Urea cycle; Arginine and Proline Metabolism	35127	100001167	HMDB06695	-0.248608	0.109986	0.0247941	1	0.133229
met47301	X - 18887			47301			0.0910262	0.0406537	0.0261843	1	0.137393
met48407	dopamine 3-O-sulfate	Amino Acid	Tyrosine Metabolism	48407	100006361	HMDB06275	-0.113694	0.0506703	0.0264216	1	0.137393
met46144	methyl glucopyranoside (alpha + beta)	Xenobiotics	Food Component/Plant	46144	100005864		0.383936	0.176046	0.0301444	1	0.154688
met34407	isovalerylcarnitine (C5)	Amino Acid	Leucine, Isoleucine and Valine Metabolism	34407	100001393	HMDB00688	-0.139518	0.0646747	0.0326418	1	0.165329
met49637	X - 23739			49637			-0.0467115	0.0219031	0.0346355	1	0.170985
met512	asparagine	Amino Acid	Alanine and Aspartate Metabolism	512	917	HMDB00168	-0.0272703	0.0127812	0.0344616	1	0.170985
met12122	naproxen	Xenobiotics	Drug - Analgesics, Anesthetics	12122	1384	HMDB01923	0.386869	0.185463	0.0380543	1	0.185515
met18245	gamma-glutamylhistidine	Peptide	Gamma-glutamyl Amino Acid	18245	1235		-0.124661	0.0607229	0.0417709	1	0.200875
met18369	gamma-glutamylleucine	Peptide	Gamma-glutamyl Amino Acid	18369	1268	HMDB11171	-0.074846	0.0366077	0.0427503	1	0.200875
met32354	ascorbate (Vitamin C)	Cofactors and Vitamins	Ascorbate and Aldarate Metabolism	32354	233	HMDB00044	0.0563693	0.0275357	0.0426569	1	0.200875
met35126	phenylacetylglutamine	Peptide	Acetylated Peptides	35126	100001417	HMDB06344	0.0913556	0.0449467	0.0439004	1	0.203823
met15336	tartarate	Xenobiotics	Food Component/Plant	15336	100000295	HMDB00956	0.049602	0.0248569	0.0479181	1	0.217303
met64	phenylalanine	Amino Acid	Phenylalanine Metabolism	64	460	HMDB00159	-0.0245753	0.0123	0.0475046	1	0.217303
met43334	O-desmethylvenlafaxine	Xenobiotics	Drug - Psychoactive	43334	100004173	HMDB60532	0.181917	0.0917779	0.0492257	1	0.220667
met43258	acisoga	Amino Acid	Polyamine Metabolism	43258	100004541		0.106515	0.0538155	0.0498447	1	0.220903
met48195	fructose	Carbohydrate	Fructose, Mannose and Galactose Metabolism	48195	878	HMDB00660	-0.0273	0.0138856	0.0511706	1	0.224231
met22116	4-methyl-2-oxopentanoate	Amino Acid	Leucine, Isoleucine and Valine Metabolism	22116	100000551	HMDB00695	-0.0289612	0.0149052	0.0537878	1	0.230519
met38623	venlafaxine	Xenobiotics	Drug - Psychoactive	38623	100002807	HMDB05016	0.182715	0.0936408	0.0533626	1	0.230519
met62060	hydroxyasparagine**	Amino Acid	Alanine and Aspartate Metabolism	62060	100020205	HMDB32332	-0.0994957	0.0516834	0.0560507	1	0.237606
met33422	gamma-glutamylphenylalanine	Peptide	Gamma-glutamyl Amino Acid	33422	100000491	HMDB00594	-0.0973455	0.0511369	0.0590174	1	0.247492
met32401	trigonelline (N'-methylnicotinate)	Cofactors and Vitamins	Nicotinate and Nicotinamide Metabolism	32401	100001092	HMDB00875	0.122789	0.0649981	0.0606708	1	0.250075
met35637	cysteinylglycine	Amino Acid	Glutathione Metabolism	35637	278	HMDB00078	-0.107208	0.056808	0.061557	1	0.250075
met46539	N-acetylglucosamine/N-acetylgalactosamine	Carbohydrate	Aminosugar Metabolism	46539	100006435	HMDB00215	0.0700076	0.0370453	0.061282	1	0.250075
met32377	N-acetylneuraminate	Carbohydrate	Aminosugar Metabolism	32377	1162	HMDB00230	0.0443727	0.0236887	0.062888	1	0.250269
met46473	X - 15497			46473			0.0617801	0.0328814	0.0626107	1	0.250269
met1114	deoxycholate	Lipid	Secondary Bile Acid Metabolism	1114	302	HMDB00626	-0.165091	0.0886143	0.0643478	1	0.252713
met46661	X - 15245			46661			-0.124946	0.0673194	0.0654463	1	0.252713
met52616	1-palmitoyl-2-stearoyl-GPC (16:0/18:0)	Lipid	Phosphatidylcholine (PC)	52616	100008921	HMDB07970	0.0586918	0.0315767	0.06486	1	0.252713
met27710	N-acetylglycine	Amino Acid	Glycine, Serine and Threonine Metabolism	27710	100001006	HMDB00532	0.046416	0.0252628	0.0680742	1	0.260284
met47787	X - 14838			47787			-0.0707073	0.0398729	0.0777467	1	0.294381
met3147	xanthine	Nucleotide	Purine Metabolism, (Hypo)Xanthine/Inosine containing	3147	1004	HMDB00292	0.0271845	0.0154491	0.0805307	1	0.299855
met54704	X - 24766			54704			-0.0309447	0.0176043	0.0807303	1	0.299855
met1585	N-acetylalanine	Amino Acid	Alanine and Aspartate Metabolism	1585	1110	HMDB00766	0.0243195	0.0139438	0.0831501	1	0.30593
met1649	valine	Amino Acid	Leucine, Isoleucine and Valine Metabolism	1649	566	HMDB00883	-0.0330664	0.019129	0.0857659	1	0.308421
met1712	cortisol	Lipid	Corticosteroids	1712	356	HMDB00063	-0.0381601	0.0220872	0.0861996	1	0.308421
met46142	mannitol/sorbitol	Carbohydrate	Fructose, Mannose and Galactose Metabolism	46142	100001740	HMDB00247	-0.0282172	0.0163092	0.0855736	1	0.308421
met48152	glucose	Carbohydrate	Glycolysis, Gluconeogenesis, and Pyruvate Metabolism	48152	572	HMDB00122	-0.0156314	0.00912066	0.0884709	1	0.313669
met1303	malate	Energy	TCA Cycle	1303	409	HMDB00156	0.0143986	0.00848381	0.0916368	1	0.321967
met1587	N-acetylleucine	Amino Acid	Leucine, Isoleucine and Valine Metabolism	1587	1082	HMDB11756	0.0704494	0.042232	0.0967254	1	0.325451
met43847	glycerol 3-phosphate	Lipid	Glycerolipid Metabolism	43847	100000258	HMDB00126	-0.173735	0.104011	0.0968007	1	0.325451
met513	creatinine	Amino Acid	Creatine Metabolism	513	275	HMDB00562	-0.0152501	0.00911925	0.0964913	1	0.325451
met52307	glycerophosphoinositol*	Lipid	Phospholipid Metabolism	52307	100001621		0.0375522	0.0224612	0.0966254	1	0.325451
met57687	N-trimethyl 5-aminovalerate	Amino Acid	Lysine Metabolism	57687	100015962		0.046733	0.0277901	0.0945824	1	0.325451
met39592	S-methylcysteine	Amino Acid	Methionine, Cysteine, SAM and Taurine Metabolism	39592	100002749	HMDB02108	0.122095	0.0733835	0.0983159	1	0.32772
met47687	X - 12100			47687			-0.0354146	0.0213849	0.0998391	1	0.329977
met49469	X - 23593			49469			-0.0296755	0.0179878	0.100955	1	0.330861
met33955	1-palmitoyl-GPC (16:0)	Lipid	Lysophospholipid	33955	100001263	HMDB10382	0.0414325	0.0257194	0.109045	1	0.351378
met43239	S-allylcysteine	Xenobiotics	Food Component/Plant	43239	100004509	HMDB34323	0.454474	0.282404	0.10967	1	0.351378
met52281	2-hydroxybutyrate/2-hydroxyisobutyrate	Amino Acid	Glutathione Metabolism	52281	100008928		-0.0357151	0.0222195	0.109918	1	0.351378
met52470	1-palmitoyl-2-palmitoleoyl-GPC (16:0/16:1)*	Lipid	Phosphatidylcholine (PC)	52470	100008984	HMDB07969	0.0284297	0.0177979	0.112157	1	0.355618
met46960	sulfate*	Xenobiotics	Chemical	46960	100002528	HMDB01448	0.0167264	0.0105112	0.113518	1	0.357032
met396	glutarate (C5-DC)	Lipid	Fatty Acid, Dicarboxylate	396	339	HMDB00661	0.104165	0.0667845	0.12087	1	0.377114
met1123	inosine	Nucleotide	Purine Metabolism, (Hypo)Xanthine/Inosine containing	1123	361	HMDB00195	-0.0186037	0.0122414	0.130536	1	0.400858
met15506	choline	Lipid	Phospholipid Metabolism	15506	1256	HMDB00097	-0.019631	0.0129058	0.130291	1	0.400858
met46106	desmethylnaproxen sulfate	Xenobiotics	Drug - Analgesics, Anesthetics	46106	100001788		0.224443	0.148505	0.132144	1	0.402626
met37496	N-acetylputrescine	Amino Acid	Polyamine Metabolism	37496	192	HMDB02064	-0.0249412	0.0165443	0.133644	1	0.40404
met32306	trans-4-hydroxyproline	Amino Acid	Urea cycle; Arginine and Proline Metabolism	32306	1001	HMDB00725	-0.0495565	0.0332523	0.138046	1	0.410978
met37432	N-acetyl-beta-alanine	Nucleotide	Pyrimidine Metabolism, Uracil containing	37432	100002102		0.0340036	0.0228076	0.137926	1	0.410978
met43343	2-aminooctanoate	Lipid	Fatty Acid, Amino	43343	100004227	HMDB00991	-0.113026	0.0764981	0.141656	1	0.415382
met485	spermidine	Amino Acid	Polyamine Metabolism	485	50	HMDB01257	0.101088	0.0682861	0.140871	1	0.415382
met1419	5-methylthioadenosine (MTA)	Amino Acid	Polyamine Metabolism	1419	212	HMDB01173	0.0242552	0.0165465	0.145002	1	0.418894
met57691	trazadone	Xenobiotics	Drug - Psychoactive	57691	100015783	HMDB14794	0.167801	0.114583	0.144988	1	0.418894
met48408	tyramine O-sulfate	Amino Acid	Tyrosine Metabolism	48408	100006092	HMDB06409	-0.12741	0.0880909	0.149588	1	0.428966
met43549	N-formylanthranilic acid	Amino Acid	Tryptophan Metabolism	43549	100004561	HMDB04089	0.0751821	0.0520526	0.150974	1	0.42978
met37506	palmitoyl sphingomyelin (d18:1/16:0)	Lipid	Sphingolipid Metabolism	37506	100002107		-0.0305809	0.0214576	0.156005	1	0.440883
met58	glycine	Amino Acid	Glycine, Serine and Threonine Metabolism	58	340	HMDB00123	0.0264111	0.0186786	0.159245	1	0.446802
met1508	pantothenate	Cofactors and Vitamins	Pantothenate and CoA Metabolism	1508	1024	HMDB00210	0.058136	0.0413807	0.162049	1	0.448861
met33441	isobutyrylcarnitine (C4)	Amino Acid	Leucine, Isoleucine and Valine Metabolism	33441	100001055	HMDB00736	-0.0337584	0.0241155	0.163431	1	0.448861
met48258	1-oleoyl-GPC (18:1)	Lipid	Lysophospholipid	48258	100001272	HMDB02815	0.0343204	0.0244554	0.162318	1	0.448861
met52769	X - 24452			52769			0.023184	0.0166054	0.164624	1	0.448976
met3127	hypoxanthine	Nucleotide	Purine Metabolism, (Hypo)Xanthine/Inosine containing	3127	171	HMDB00157	0.0343796	0.0248439	0.167629	1	0.453995
met39603	ethyl glucuronide	Xenobiotics	Chemical	39603	100002849	HMDB10325	-0.202958	0.148065	0.172089	1	0.461469
met46146	4-methylcatechol sulfate	Xenobiotics	Benzoate Metabolism	46146	100004111		0.384622	0.280772	0.172755	1	0.461469
met12110	isocitrate	Energy	TCA Cycle	12110	1206	HMDB00193	0.0303755	0.0223447	0.175598	1	0.462725
met32197	3-(4-hydroxyphenyl)lactate	Amino Acid	Tyrosine Metabolism	32197	240	HMDB00755	0.0336783	0.0247131	0.174963	1	0.462725
met33939	N-acetylthreonine	Amino Acid	Glycine, Serine and Threonine Metabolism	33939	100001274		0.0235483	0.0174749	0.179743	1	0.464973
met46645	X - 13728			46645			-0.100992	0.0749692	0.180028	1	0.464973
met53231	thioproline	Xenobiotics	Chemical	53231	100009232		-0.435089	0.322462	0.179168	1	0.464973
met1868	cysteine	Amino Acid	Methionine, Cysteine, SAM and Taurine Metabolism	1868	800	HMDB00574	0.0208464	0.0157524	0.187612	1	0.478226
met48885	arabitol/xylitol	Carbohydrate	Pentose Metabolism	48885	100006430		0.0238628	0.0180129	0.187127	1	0.478226
met61682	X - 25109			61682			0.0359483	0.0272925	0.189851	1	0.480792
met20699	erythritol	Xenobiotics	Food Component/Plant	20699	100000846	HMDB02994	-0.0505154	0.0385665	0.19151	1	0.481864
met15497	argininosuccinate	Amino Acid	Urea cycle; Arginine and Proline Metabolism	15497	232	HMDB00052	0.0764891	0.0586804	0.194303	1	0.482829
met46643	X - 13529			46643			-0.0436423	0.0334846	0.19437	1	0.482829
met528	alpha-ketoglutarate	Energy	TCA Cycle	528	93	HMDB00208	-0.0275752	0.0213066	0.197476	1	0.48744
met48493	sphingomyelin (d18:1/22:1, d18:2/22:0, d16:1/24:1)*	Lipid	Sphingolipid Metabolism	48493	100006295	HMDB12104	-0.060291	0.0469096	0.20039	1	0.491522
met1284	threonine	Amino Acid	Glycine, Serine and Threonine Metabolism	1284	564	HMDB00167	-0.0186908	0.0149235	0.212252	1	0.492729
met15772	ribitol	Carbohydrate	Pentose Metabolism	15772	100000406	HMDB00508	-0.0178176	0.0141757	0.210678	1	0.492729
met40700	diglycerol	Xenobiotics	Chemical	40700	100003700		-0.0291842	0.0229223	0.205031	1	0.492729
met48130	N6-succinyladenosine	Nucleotide	Purine Metabolism, Adenine containing	48130	100001664	HMDB00912	0.0261855	0.0208733	0.211565	1	0.492729
met52294	2-hydroxyglutarate	Lipid	Fatty Acid, Dicarboxylate	52294	100002070	HMDB00606	0.0963993	0.0763611	0.208733	1	0.492729
met52438	1-stearoyl-2-oleoyl-GPC (18:0/18:1)	Lipid	Phosphatidylcholine (PC)	52438	100008904	HMDB08038	0.0257582	0.0202098	0.204271	1	0.492729
met57747	3-methylglutaconate	Amino Acid	Leucine, Isoleucine and Valine Metabolism	57747	100002458	HMDB00522	-0.0193229	0.0153996	0.21138	1	0.492729
met61858	ribulonate/xylulonate*	Carbohydrate	Pentose Metabolism	61858	100019968		0.0422156	0.0332459	0.206183	1	0.492729
met62062	3-hydroxystachydrine*	Xenobiotics	Food Component/Plant	62062	100020203		0.319096	0.254329	0.211448	1	0.492729
met48448	3-hydroxypyridine sulfate	Xenobiotics	Chemical	48448	100006098		-0.339883	0.275232	0.218698	1	0.501719
met52689	1-(1-enyl-palmitoyl)-2-arachidonoyl-GPC (P-16:0/20:4)*	Lipid	Plasmalogen	52689	100009014	HMDB11220	-0.0646215	0.0522735	0.218112	1	0.501719
met47581	X - 10457			47581			0.0295496	0.0240087	0.220202	1	0.502215
met33936	octanoylcarnitine (C8)	Lipid	Fatty Acid Metabolism(Acyl Carnitine)	33936	100001247	HMDB00791	-0.0784696	0.0650515	0.229474	1	0.52032
met1561	alpha-tocopherol	Cofactors and Vitamins	Tocopherol Metabolism	1561	1105	HMDB01893	-0.0294986	0.0247623	0.235231	1	0.524229
met33013	nicotinamide riboside	Cofactors and Vitamins	Nicotinate and Nicotinamide Metabolism	33013	100001310	HMDB00855	0.0247709	0.0206726	0.232622	1	0.524229
met52661	X - 24431			52661			0.0593977	0.0497922	0.23441	1	0.524229
met1558	4-acetamidobutanoate	Amino Acid	Polyamine Metabolism	1558	1113	HMDB03681	0.0213733	0.0182712	0.243865	1	0.540383
met12032	4-acetamidophenol	Xenobiotics	Drug - Analgesics, Anesthetics	12032	1383	HMDB01859	0.290618	0.249619	0.246178	1	0.542425
met38347	2-oxoadipate	Amino Acid	Lysine Metabolism	38347	92	HMDB00225	-0.0688336	0.0596023	0.249943	1	0.547627
met3155	3-ureidopropionate	Nucleotide	Pyrimidine Metabolism, Uracil containing	3155	1053	HMDB00026	0.0373724	0.0336543	0.268451	1	0.556411
met33442	pseudouridine	Nucleotide	Pyrimidine Metabolism, Uracil containing	33442	821	HMDB00767	0.0168682	0.0152293	0.269747	1	0.556411
met34384	stachydrine	Xenobiotics	Food Component/Plant	34384	100001296	HMDB04827	0.100856	0.0894125	0.261101	1	0.556411
met34389	1-methylxanthine	Xenobiotics	Xanthine Metabolism	34389	100001405	HMDB10738	-0.317877	0.286292	0.268715	1	0.556411
met48491	sphingomyelin (d18:1/20:1, d18:2/20:0)*	Lipid	Sphingolipid Metabolism	48491	100006292		-0.0588073	0.0531005	0.26974	1	0.556411
met49014	X - 23314			49014			0.0745737	0.0675075	0.271072	1	0.556411
met52434	palmitoyl dihydrosphingomyelin (d18:0/16:0)*	Lipid	Sphingolipid Metabolism	52434	100008954		-0.0621809	0.0545503	0.256003	1	0.556411
met575	arabinose	Carbohydrate	Pentose Metabolism	575	828	HMDB00646	0.0143296	0.0128804	0.267554	1	0.556411
met57719	X - 24952			57719			0.0311623	0.0275525	0.259762	1	0.556411
met587	gluconate	Xenobiotics	Food Component/Plant	587	338	HMDB00625	0.0958958	0.085047	0.260745	1	0.556411
met605	uracil	Nucleotide	Pyrimidine Metabolism, Uracil containing	605	825	HMDB00300	-0.0158077	0.0142843	0.270217	1	0.556411
met62249	X - 25182			62249			0.0908566	0.0819918	0.269482	1	0.556411
met52533	X - 24337			52533			0.0213174	0.0193541	0.272589	1	0.556595
met1633	homocarnosine	Amino Acid	Histidine Metabolism	1633	41	HMDB00745	-0.0495941	0.0457352	0.279793	1	0.56561
met35320	catechol sulfate	Xenobiotics	Benzoate Metabolism	35320	100001605	HMDB59724	-0.0810044	0.0746709	0.279904	1	0.56561
met15122	glycerol	Lipid	Glycerolipid Metabolism	15122	1254	HMDB00131	0.021523	0.0199609	0.282779	1	0.568472
met15650	N1-methyladenosine	Nucleotide	Purine Metabolism, Adenine containing	15650	1242	HMDB03331	0.0256969	0.0239191	0.284341	1	0.568683
met1573	guanosine	Nucleotide	Purine Metabolism, Guanine containing	1573	1099	HMDB00133	0.0211634	0.0197952	0.28663	1	0.570335
met55015	gamma-glutamyl-alpha-lysine	Peptide	Gamma-glutamyl Amino Acid	55015	100010901		-0.0477174	0.0462415	0.303875	1	0.601581
met20676	maleate	Lipid	Fatty Acid, Dicarboxylate	20676	100000707	HMDB00176	0.0677631	0.0659542	0.305836	1	0.602405
met57554	2'-O-methylcytidine	Nucleotide	Pyrimidine Metabolism, Cytidine containing	57554	100010895		-0.0239423	0.0235341	0.310659	1	0.60883
met1651	pyridoxal	Cofactors and Vitamins	Vitamin B6 Metabolism	1651	491	HMDB01545	0.0720167	0.0724114	0.321617	1	0.620945
met18335	quinate	Xenobiotics	Food Component/Plant	18335	100000442	HMDB03072	0.196432	0.197115	0.320536	1	0.620945
met46261	X - 19438			46261			-0.0821772	0.082154	0.318781	1	0.620945
met40406	trimethylamine N-oxide	Lipid	Phospholipid Metabolism	40406	100003397	HMDB00925	0.0330121	0.0334893	0.325864	1	0.626045
met38100	betonicine	Xenobiotics	Food Component/Plant	38100	100002153	HMDB29412	0.259806	0.26475	0.32826	1	0.627555
met61833	5,6-dihydrouridine	Nucleotide	Pyrimidine Metabolism, Uracil containing	61833	100001425		0.0130973	0.0134212	0.330656	1	0.629052
met47431	X - 11612			47431			0.0282563	0.0291254	0.333643	1	0.631653
met46548	3-methylglutarylcarnitine (2)	Amino Acid	Leucine, Isoleucine and Valine Metabolism	46548	100005850	HMDB00552	-0.0338086	0.035004	0.336	1	0.633043
met1299	tyrosine	Amino Acid	Tyrosine Metabolism	1299	815	HMDB00158	-0.0159072	0.0167914	0.34495	1	0.636479
met18392	theobromine	Xenobiotics	Xanthine Metabolism	18392	100000445	HMDB02825	-0.0732225	0.0785076	0.352511	1	0.636479
met31938	5-hydroxyhexanoate	Lipid	Fatty Acid, Monohydroxy	31938	100001148	HMDB00525	-0.0699664	0.0733136	0.341406	1	0.636479
met37475	4-acetaminophen sulfate	Xenobiotics	Drug - Analgesics, Anesthetics	37475	2049	HMDB59911	0.23773	0.254188	0.351299	1	0.636479
met38595	ranitidine	Xenobiotics	Drug - Gastrointestinal	38595	100002735	HMDB01930	-0.0369739	0.0391482	0.346156	1	0.636479
met38658	atenolol	Xenobiotics	Drug - Cardiovascular	38658	100002726	HMDB01924	0.0625129	0.0670395	0.352237	1	0.636479
met42374	2-aminobutyrate	Amino Acid	Glutathione Metabolism	42374	1128	HMDB00650	-0.0160146	0.01682	0.342461	1	0.636479
met42459	sphingomyelin (d18:2/16:0, d18:1/16:1)*	Lipid	Sphingolipid Metabolism	42459	100004329		-0.0314143	0.0334505	0.349035	1	0.636479
met52461	1-palmitoyl-2-oleoyl-GPC (16:0/18:1)	Lipid	Phosphatidylcholine (PC)	52461	1539	HMDB07972	0.0170534	0.0182236	0.350802	1	0.636479
met1769	cortisone	Lipid	Corticosteroids	1769	273	HMDB02802	-0.0483753	0.0523965	0.357363	1	0.642265
met33173	2-hydroxyacetaminophen sulfate*	Xenobiotics	Drug - Analgesics, Anesthetics	33173	100001791		0.188367	0.206872	0.364267	1	0.649792
met34390	7-methylxanthine	Xenobiotics	Xanthine Metabolism	34390	100001396	HMDB01991	-0.173138	0.19052	0.364883	1	0.649792
met40007	carboxyethyl-GABA	Amino Acid	Glutamate Metabolism	40007	100003260	HMDB02201	-0.0145403	0.0163919	0.376508	1	0.665876
met514	cytidine	Nucleotide	Pyrimidine Metabolism, Cytidine containing	514	827	HMDB00089	0.00998378	0.0112767	0.37733	1	0.665876
met1519	sucrose	Carbohydrate	Disaccharides and Oligosaccharides	1519	935	HMDB00258	-0.0755581	0.0858111	0.380016	1	0.667596
met45721	3-(N-acetyl-L-cystein-S-yl) acetaminophen	Xenobiotics	Drug - Analgesics, Anesthetics	45721	2048		0.123157	0.141475	0.384798	1	0.672964
met42420	erythronate*	Carbohydrate	Aminosugar Metabolism	42420	100001320	HMDB00613	0.00980565	0.0113041	0.387022	1	0.673834
met61868	1-ribosyl-imidazoleacetate*	Amino Acid	Histidine Metabolism	61868	100001668	HMDB02331	-0.0225804	0.0263409	0.39258	1	0.680471
met41726	oxypurinol	Xenobiotics	Drug - Metabolic	41726	100002489	HMDB00786	-0.0667929	0.0782949	0.394971	1	0.681588
met15677	3-methylhistidine	Amino Acid	Histidine Metabolism	15677	100000042	HMDB00479	-0.0583793	0.0691219	0.399691	1	0.686694
met52597	X - 12104			52597			0.0169767	0.0202553	0.403291	1	0.68984
met52602	2'-deoxyuridine	Nucleotide	Pyrimidine Metabolism, Uracil containing	52602	536	HMDB00012	-0.035442	0.0425348	0.406101	1	0.691614
met52611	1-stearoyl-2-docosahexaenoyl-GPC (18:0/22:6)	Lipid	Phosphatidylcholine (PC)	52611	100008916	HMDB08057	0.0226005	0.027958	0.42004	1	0.712241
met15443	glucuronate	Carbohydrate	Aminosugar Metabolism	15443	100000257	HMDB00127	0.022573	0.0282063	0.425039	1	0.714551
met49466	X - 23590			49466			-0.0141781	0.0177243	0.425066	1	0.714551
met35157	N6-carbamoylthreonyladenosine	Nucleotide	Purine Metabolism, Adenine containing	35157	100001415	HMDB41623	0.019496	0.024558	0.428483	1	0.716522
met37076	N-acetylserine	Amino Acid	Glycine, Serine and Threonine Metabolism	37076	100001851	HMDB02931	0.0129257	0.0163342	0.429913	1	0.716522
met47642	X - 12101			47642			0.0261026	0.0334221	0.436023	1	0.723613
met33961	1-stearoyl-GPC (18:0)	Lipid	Lysophospholipid	33961	100001271	HMDB10384	0.0243319	0.0314274	0.439883	1	0.726925
met32553	phenol sulfate	Amino Acid	Tyrosine Metabolism	32553	100001510	HMDB60015	-0.0360745	0.0468003	0.441917	1	0.727205
met22185	N-acetylaspartate (NAA)	Amino Acid	Alanine and Aspartate Metabolism	22185	100000787	HMDB00812	0.017931	0.0236329	0.449166	1	0.735667
met527	lactate	Carbohydrate	Glycolysis, Gluconeogenesis, and Pyruvate Metabolism	527	482	HMDB00190	-0.00825922	0.0109246	0.450832	1	0.735667
met1301	lysine	Amino Acid	Lysine Metabolism	1301	407	HMDB00182	0.0101989	0.0137382	0.458967	1	0.739641
met1515	salicylate	Xenobiotics	Drug - Topical Agents	1515	501	HMDB01895	-0.188041	0.251885	0.456267	1	0.739641
met18254	paraxanthine	Xenobiotics	Xanthine Metabolism	18254	100000453	HMDB01860	0.22135	0.299412	0.460853	1	0.739641
met46632	X - 14056			46632			-0.0160479	0.0216276	0.459197	1	0.739641
met542	3-hydroxybutyrate (BHBA)	Lipid	Ketone Bodies	542	254	HMDB00357	0.0276654	0.0384299	0.472712	1	0.755564
met43266	2-aminophenol sulfate	Xenobiotics	Chemical	43266	100004322	HMDB61116	-0.0913983	0.127707	0.474798	1	0.755801
met46957	gulonate*	Cofactors and Vitamins	Ascorbate and Aldarate Metabolism	46957	100001586	HMDB03290	-0.0152352	0.0216079	0.481769	1	0.76378
met48782	C-glycosyltryptophan	Amino Acid	Tryptophan Metabolism	48782	100006379		0.0145431	0.0207932	0.485339	1	0.766325
met47390	X - 12015			47390			0.0503158	0.0733824	0.493966	1	0.773682
met63	cholesterol	Lipid	Sterol	63	266	HMDB00067	0.0146223	0.021246	0.492321	1	0.773682
met18281	2-hydroxyhippurate (salicylurate)	Xenobiotics	Benzoate Metabolism	18281	1869	HMDB00840	-0.113767	0.16825	0.499879	1	0.776705
met31787	3-carboxy-4-methyl-5-propyl-2-furanpropanoate (CMPF)	Lipid	Fatty Acid, Dicarboxylate	31787	100001178	HMDB61112	0.0821804	0.12112	0.498438	1	0.776705
met42446	1-palmitoyl-2-linoleoyl-GPC (16:0/18:2)	Lipid	Phosphatidylcholine (PC)	42446	1537	HMDB07973	0.0205138	0.0309691	0.508613	1	0.777878
met46616	X - 12411			46616			0.022299	0.0336227	0.508143	1	0.777878
met52452	1-stearoyl-2-linoleoyl-GPC (18:0/18:2)*	Lipid	Phosphatidylcholine (PC)	52452	100008980	HMDB08039	0.0187999	0.0280611	0.503788	1	0.777878
met62309	N-acetyl-isoputreanine*	Amino Acid	Polyamine Metabolism	62309	100020487		0.0109476	0.0164799	0.507477	1	0.777878
met46612	X - 12206			46612			0.0271577	0.0413464	0.511938	1	0.778907
met52265	X - 24228			52265			0.0124897	0.0190598	0.51328	1	0.778907
met30460	1-methylhistidine	Amino Acid	Histidine Metabolism	30460	100001051	HMDB00001	-0.0181815	0.0287431	0.528033	1	0.792049
met32445	3-methylxanthine	Xenobiotics	Xanthine Metabolism	32445	100001108	HMDB01886	-0.0926342	0.145902	0.526342	1	0.792049
met37097	tryptophan betaine	Amino Acid	Tryptophan Metabolism	37097	100001743	HMDB61115	-0.0508785	0.0798489	0.524915	1	0.792049
met2831	adenosine 3',5'-cyclic monophosphate (cAMP)	Nucleotide	Purine Metabolism, Adenine containing	2831	207	HMDB00058	0.0287525	0.046062	0.53353	1	0.797229
met57461	argininate*	Amino Acid	Urea cycle; Arginine and Proline Metabolism	57461	100002769	HMDB03148	-0.0278965	0.0454249	0.540048	1	0.803889
met19130	1,2-dipalmitoyl-GPC (16:0/16:0)	Lipid	Phosphatidylcholine (PC)	19130	100000657	HMDB00564	0.0118667	0.0195669	0.545105	1	0.806775
met34396	choline phosphate	Lipid	Phospholipid Metabolism	34396	267	HMDB01565	0.0242456	0.0400759	0.546124	1	0.806775
met33228	1-arachidonoyl-GPC (20:4n6)*	Lipid	Lysophospholipid	33228	100001551	HMDB10395	0.0215531	0.0361062	0.551342	1	0.809314
met43400	2-piperidinone	Xenobiotics	Food Component/Plant	43400	100004295	HMDB11749	-0.0554654	0.0930454	0.551994	1	0.809314
met33943	N-acetylglutamine	Amino Acid	Glutamate Metabolism	33943	100001253	HMDB06029	0.00871887	0.0150144	0.562266	1	0.821287
met19258	1-myristoyl-2-palmitoyl-GPC (14:0/16:0)	Lipid	Phosphatidylcholine (PC)	19258	100000672	HMDB07869	0.0117423	0.0203758	0.565242	1	0.822554
met18374	methionine sulfoxide	Amino Acid	Methionine, Cysteine, SAM and Taurine Metabolism	18374	100000039	HMDB02005	-0.0160915	0.0280967	0.567723	1	0.823093
met22119	5-methylcytidine	Nucleotide	Pyrimidine Metabolism, Cytidine containing	22119	100000763	HMDB00982	0.00814637	0.0143519	0.571155	1	0.825001
met15745	methylsuccinate	Amino Acid	Leucine, Isoleucine and Valine Metabolism	15745	2051	HMDB01844	0.0348716	0.0628561	0.579807	1	0.825273
met1898	proline	Amino Acid	Urea cycle; Arginine and Proline Metabolism	1898	480	HMDB00162	-0.0182095	0.0327005	0.578391	1	0.825273
met37058	succinylcarnitine (C4-DC)	Energy	TCA Cycle	37058	100001948	HMDB61717	-0.011486	0.0205186	0.576474	1	0.825273
met38276	2,3-dihydroxyisovalerate	Xenobiotics	Food Component/Plant	38276	100002417	HMDB12141	-0.0625913	0.112281	0.578169	1	0.825273
met57345	galactosylglycerol*	Lipid	Glycolipid Metabolism	57345	100003064	HMDB06790	-0.0104684	0.019473	0.591678	1	0.839107
met15765	ethylmalonate	Amino Acid	Leucine, Isoleucine and Valine Metabolism	15765	2054	HMDB00622	0.0117111	0.0224616	0.602823	1	0.846096
met1638	arginine	Amino Acid	Urea cycle; Arginine and Proline Metabolism	1638	231	HMDB00517	0.00758443	0.0146031	0.604236	1	0.846096
met57547	2,3-dihydroxy-2-methylbutyrate	Amino Acid	Leucine, Isoleucine and Valine Metabolism	57547	100010869	HMDB29576	0.0155694	0.030054	0.605284	1	0.846096
met62277	hydroxy-CMPF*	Xenobiotics	Chemical	62277	100019794		0.165751	0.315384	0.599949	1	0.846096
met48490	sphingomyelin (d18:1/20:0, d16:1/22:0)*	Lipid	Sphingolipid Metabolism	48490	100006290	HMDB12102	-0.0175153	0.0344192	0.611469	1	0.848658
met48492	behenoyl sphingomyelin (d18:1/22:0)*	Lipid	Sphingolipid Metabolism	48492	100006294	HMDB12103	0.0323125	0.0631926	0.609827	1	0.848658
met37529	sphingomyelin (d18:1/18:1, d18:2/18:0)	Lipid	Sphingolipid Metabolism	37529	100002106	HMDB12101	-0.0101575	0.0211383	0.631467	1	0.873306
met1493	ornithine	Amino Acid	Urea cycle; Arginine and Proline Metabolism	1493	444	HMDB03374	-0.00747288	0.016193	0.645077	1	0.875632
met22206	theanine	Xenobiotics	Food Component/Plant	22206	100000784	HMDB34365	0.0564718	0.120929	0.641244	1	0.875632
met32882	hydroxybupropion	Xenobiotics	Drug - Psychoactive	32882	100001309	HMDB12235	0.0417912	0.090182	0.643825	1	0.875632
met42109	phosphate	Energy	Oxidative Phosphorylation	42109	461	HMDB01429	-0.00246753	0.00534502	0.644967	1	0.875632
met44526	3-methyl-2-oxobutyrate	Amino Acid	Leucine, Isoleucine and Valine Metabolism	44526	100000936	HMDB00019	-0.00535156	0.0116825	0.647507	1	0.875632
met44656	isovalerate (i5:0)	Amino Acid	Leucine, Isoleucine and Valine Metabolism	44656	100000708	HMDB00718	0.0330609	0.070043	0.637593	1	0.875632
met45413	O-sulfo-L-tyrosine	Xenobiotics	Chemical	45413	100005384		0.00921056	0.0201848	0.648866	1	0.875632
met46111	guaiacol sulfate	Xenobiotics	Benzoate Metabolism	46111	100004208	HMDB60013	-0.0619485	0.138536	0.655452	1	0.881471
met15753	hippurate	Xenobiotics	Benzoate Metabolism	15753	100000014	HMDB00714	0.0340352	0.0792913	0.668347	1	0.882768
met15778	benzoate	Xenobiotics	Benzoate Metabolism	15778	100000008	HMDB01870	0.0208116	0.0477178	0.663098	1	0.882768
met27672	3-indoxyl sulfate	Amino Acid	Tryptophan Metabolism	27672	100000467	HMDB00682	-0.0222777	0.0537126	0.678966	1	0.882768
met35114	7-methylguanine	Nucleotide	Purine Metabolism, Guanine containing	35114	100001456	HMDB00897	-0.00481	0.0112621	0.669894	1	0.882768
met35136	5-methyluridine (ribothymidine)	Nucleotide	Pyrimidine Metabolism, Uracil containing	35136	100001446	HMDB00884	0.00749453	0.0174622	0.668412	1	0.882768
met35137	N2,N2-dimethylguanosine	Nucleotide	Purine Metabolism, Guanine containing	35137	100001412	HMDB04824	0.00739671	0.0169721	0.663576	1	0.882768
met39586	pseudoephedrine	Xenobiotics	Drug - Respiratory	39586	100002738	HMDB01943	-0.0317988	0.0756848	0.674784	1	0.882768
met46665	X - 15674			46665			0.00844702	0.0203652	0.678889	1	0.882768
met52437	sphingomyelin (d18:2/24:1, d18:1/24:2)*	Lipid	Sphingolipid Metabolism	52437	100008957		-0.0138068	0.0330799	0.676928	1	0.882768
met53230	3-hydroxyhexanoate	Lipid	Fatty Acid, Monohydroxy	53230	100006367		0.00653441	0.0157635	0.679052	1	0.882768
met33161	2-methoxyacetaminophen glucuronide*	Xenobiotics	Drug - Analgesics, Anesthetics	33161	100001795		0.0711455	0.17529	0.685167	1	0.883912
met43333	carboxyibuprofen	Xenobiotics	Drug - Analgesics, Anesthetics	43333	100004171	HMDB60564	0.0731846	0.181131	0.686732	1	0.883912
met44664	glutarylcarnitine (C5-DC)	Amino Acid	Lysine Metabolism	44664	100001593	HMDB13130	-0.028252	0.0689708	0.682615	1	0.883912
met46961	X - 21785			46961			-0.00556715	0.01427	0.697025	1	0.89421
met27665	1-methylnicotinamide	Cofactors and Vitamins	Nicotinate and Nicotinamide Metabolism	27665	55	HMDB00699	-0.0164218	0.0433208	0.705198	1	0.899788
met59	histidine	Amino Acid	Histidine Metabolism	59	355	HMDB00177	-0.00507581	0.0134297	0.705987	1	0.899788
met19503	stearoyl sphingomyelin (d18:1/18:0)	Lipid	Sphingolipid Metabolism	19503	1538	HMDB01348	0.00739231	0.0201199	0.713785	1	0.906763
met1110	arachidonate (20:4n6)	Lipid	Polyunsaturated Fatty Acid (n3 and n6)	1110	229	HMDB01043	-0.0221132	0.063559	0.728431	1	0.916414
met33967	N-acetylisoleucine	Amino Acid	Leucine, Isoleucine and Valine Metabolism	33967	100001276	HMDB61684	0.00784334	0.0223546	0.726274	1	0.916414
met47417	X - 22162			47417			-0.00884609	0.0251148	0.725137	1	0.916414
met569	caffeine	Xenobiotics	Xanthine Metabolism	569	849	HMDB01847	0.0692587	0.201098	0.731028	1	0.916723
met18368	cys-gly, oxidized	Amino Acid	Glutathione Metabolism	18368	1224		-0.0115439	0.0353709	0.744576	1	0.92496
met22130	phenyllactate (PLA)	Amino Acid	Phenylalanine Metabolism	22130	100000774	HMDB00779	0.0114939	0.0352319	0.744712	1	0.92496
met35665	N-acetyl-aspartyl-glutamate (NAAG)	Amino Acid	Glutamate Metabolism	35665	100001612	HMDB01067	0.012739	0.0388762	0.743598	1	0.92496
met48255	arabonate/xylonate	Carbohydrate	Pentose Metabolism	48255	100006115		-0.00790846	0.0244816	0.747088	1	0.924967
met15720	N-acetylglutamate	Amino Acid	Glutamate Metabolism	15720	100000282	HMDB01138	-0.00863394	0.0303496	0.77641	1	0.926633
met18394	theophylline	Xenobiotics	Xanthine Metabolism	18394	100000437	HMDB01889	0.0636178	0.22407	0.776856	1	0.926633
met27718	creatine	Amino Acid	Creatine Metabolism	27718	1221	HMDB00064	0.00271602	0.00984592	0.783019	1	0.926633
met32578	X - 11261			32578			0.0225172	0.0714568	0.753091	1	0.926633
met33132	X - 11787			33132			-0.01219	0.040181	0.761856	1	0.926633
met34424	5-acetylamino-6-amino-3-methyluracil	Xenobiotics	Xanthine Metabolism	34424	100001403	HMDB04400	0.0442958	0.156674	0.777822	1	0.926633
met36103	p-cresol sulfate	Xenobiotics	Benzoate Metabolism	36103	100001315	HMDB11635	0.0167388	0.0571987	0.770251	1	0.926633
met43424	dimethyl sulfone	Xenobiotics	Chemical	43424	100004284	HMDB04983	-0.0428921	0.138257	0.756786	1	0.926633
met46982	X - 11838			46982			0.00662733	0.0232291	0.775678	1	0.926633
met48351	N1-methylinosine	Nucleotide	Purine Metabolism, (Hypo)Xanthine/Inosine containing	48351	100001409	HMDB02721	-0.00658516	0.0215018	0.759876	1	0.926633
met49521	X - 23644			49521			0.0299506	0.107752	0.78142	1	0.926633
met52610	1-palmitoyl-2-docosahexaenoyl-GPC (16:0/22:6)	Lipid	Phosphatidylcholine (PC)	52610	100008915	HMDB07991	0.00743347	0.02649	0.779359	1	0.926633
met53031	methylsuccinoylcarnitine	Amino Acid	Leucine, Isoleucine and Valine Metabolism	53031	100009275		0.0138119	0.0474274	0.771259	1	0.926633
met54841	X - 24813			54841			0.00691454	0.0226644	0.760741	1	0.926633
met57814	(N(1) + N(8))-acetylspermidine	Amino Acid	Polyamine Metabolism	57814	100016038		0.0101546	0.0369934	0.784074	1	0.926633
met49515	X - 23639			49515			0.0154839	0.0572567	0.787176	1	0.927488
met33942	N-acetylasparagine	Amino Acid	Alanine and Aspartate Metabolism	33942	100001257	HMDB06028	-0.00410423	0.0155428	0.792092	1	0.927675
met33946	N-acetylhistidine	Amino Acid	Histidine Metabolism	33946	100001293	HMDB32055	-0.00917221	0.0345914	0.791241	1	0.927675
met20675	1,5-anhydroglucitol (1,5-AG)	Carbohydrate	Glycolysis, Gluconeogenesis, and Pyruvate Metabolism	20675	100000580	HMDB02712	-0.0074196	0.0287435	0.796649	1	0.928028
met531	3-hydroxy-3-methylglutarate	Lipid	Mevalonate Metabolism	531	112	HMDB00355	-0.00442688	0.0174027	0.799532	1	0.928028
met53114	X - 24686			53114			-0.00819037	0.0321266	0.799142	1	0.928028
met38600	omeprazole	Xenobiotics	Drug - Gastrointestinal	38600	100002725	HMDB01913	0.025629	0.112112	0.819466	1	0.948344
met15736	4-acetamidophenylglucuronide	Xenobiotics	Drug - Analgesics, Anesthetics	15736	100000043	HMDB10316	-0.0578357	0.26289	0.826167	1	0.95327
met1494	5-oxoproline	Amino Acid	Glutathione Metabolism	1494	1021	HMDB00267	0.00227609	0.0107283	0.832316	1	0.95507
met27719	galactonate	Carbohydrate	Fructose, Mannose and Galactose Metabolism	27719	100001026	HMDB00565	0.0239628	0.113435	0.832982	1	0.95507
met27731	ribonate	Carbohydrate	Pentose Metabolism	27731	100001007	HMDB00867	-0.00444939	0.0213378	0.835074	1	0.95507
met1496	methylmalonate (MMA)	Lipid	Fatty Acid Metabolism (also BCAA Metabolism)	1496	418	HMDB00202	0.00621455	0.0320201	0.846268	1	0.95665
met31934	2-hydroxyadipate	Lipid	Fatty Acid, Dicarboxylate	31934	100001153	HMDB00321	0.00866829	0.0428416	0.839963	1	0.95665
met38306	metformin	Xenobiotics	Drug - Metabolic	38306	100002405	HMDB01921	-0.0212711	0.10954	0.846203	1	0.95665
met43256	N-acetyl-3-methylhistidine*	Amino Acid	Histidine Metabolism	43256	100002204		0.0118752	0.0592417	0.841371	1	0.95665
met40469	N1-Methyl-2-pyridone-5-carboxamide	Cofactors and Vitamins	Nicotinate and Nicotinamide Metabolism	40469	100001468	HMDB04193	0.00719714	0.0383287	0.851311	1	0.95957
met49463	X - 23587			49463			0.0164006	0.0904866	0.856425	1	0.962553
met15140	kynurenine	Amino Acid	Tryptophan Metabolism	15140	100000265	HMDB00684	-0.0036861	0.0227874	0.871696	1	0.974102
met35172	orotidine	Nucleotide	Pyrimidine Metabolism, Orotate containing	35172	100001416	HMDB00788	0.00427387	0.0262351	0.870798	1	0.974102
met553	cotinine	Xenobiotics	Tobacco Metabolite	553	848	HMDB01046	-0.0134139	0.0864668	0.876909	1	0.977127
met22001	3-hydroxyoctanoate	Lipid	Fatty Acid, Monohydroxy	22001	100000773	HMDB01954	-0.00804604	0.0542539	0.882298	1	0.980331
met1444	pipecolate	Amino Acid	Lysine Metabolism	1444	1025	HMDB00070	-0.00873681	0.0608365	0.885982	1	0.980596
met1498	N6,N6,N6-trimethyllysine	Amino Acid	Lysine Metabolism	1498	189	HMDB01325	-0.0022357	0.0172825	0.897243	1	0.980596
met18037	metoprolol	Xenobiotics	Drug - Cardiovascular	18037	2028	HMDB01932	0.0099056	0.0783905	0.899544	1	0.980596
met34109	metoprolol acid metabolite*	Xenobiotics	Drug - Cardiovascular	34109	100001385		-0.00827843	0.0719084	0.908436	1	0.980596
met37459	ergothioneine	Xenobiotics	Food Component/Plant	37459	100002154	HMDB03045	0.00704331	0.055541	0.899189	1	0.980596
met43231	6-oxopiperidine-2-carboxylate	Amino Acid	Lysine Metabolism	43231	100004499	HMDB61705	-0.00229045	0.0187073	0.90273	1	0.980596
met46260	X - 11564			46260			0.00202075	0.0164838	0.902595	1	0.980596
met47702	X - 12127			47702			0.00782602	0.0692651	0.910195	1	0.980596
met47955	X - 12906			47955			0.0021015	0.0173688	0.903867	1	0.980596
met49008	X - 23308			49008			-0.00684476	0.0523925	0.896239	1	0.980596
met53127	X - 24699			53127			-0.00242477	0.0208967	0.907791	1	0.980596
met606	uridine	Nucleotide	Pyrimidine Metabolism, Uracil containing	606	535	HMDB00296	0.00175477	0.0169585	0.917729	1	0.98599
met48569	acesulfame	Xenobiotics	Food Component/Plant	48569	100006203	HMDB33585	0.0233486	0.244192	0.923987	1	0.986866
met55	beta-alanine	Nucleotide	Pyrimidine Metabolism, Uracil containing	55	244	HMDB00056	0.00136296	0.0146777	0.926136	1	0.986866
met62101	alpha-ketoglutaramate**	Amino Acid	Glutamate Metabolism	62101	100002397		-0.0014811	0.0156445	0.924698	1	0.986866
met22158	citramalate	Amino Acid	Glutamate Metabolism	22158	100000998	HMDB00426	-0.00549254	0.0704165	0.937933	1	0.987273
met27513	indoleacetate	Amino Acid	Tryptophan Metabolism	27513	100001034	HMDB00197	0.00435416	0.0499051	0.930604	1	0.987273
met33009	homostachydrine*	Xenobiotics	Food Component/Plant	33009	100001550	HMDB33433	0.00357972	0.0437312	0.93485	1	0.987273
met34419	1-linoleoyl-GPC (18:2)	Lipid	Lysophospholipid	34419	100001395	HMDB10386	0.00363277	0.0447564	0.935412	1	0.987273
met36808	dimethylarginine (SDMA + ADMA)	Amino Acid	Urea cycle; Arginine and Proline Metabolism	36808	100001810	HMDB01539	-0.00149879	0.0196102	0.939175	1	0.987273
met48080	X - 22775			48080			0.0019237	0.027732	0.944756	1	0.99047
met12017	3-methoxytyrosine	Amino Acid	Tyrosine Metabolism	12017	1342	HMDB01434	0.00261153	0.0484701	0.9571	1	1
met2772	topiramate	Xenobiotics	Drug - Neurological	2772	1388	HMDB05034	2.27e-09	7.97e-06	0.999772	1	1
met33953	N-acetylarginine	Amino Acid	Urea cycle; Arginine and Proline Metabolism	33953	100001266	HMDB04620	0.000542896	0.0175324	0.975336	1	1
met33963	acetoacetate	Lipid	Ketone Bodies	33963	1218	HMDB00060	-0.00176871	0.0656237	0.978532	1	1
met37020	carbamazepine 10,11-epoxide*	Xenobiotics	Drug - Neurological	37020	100002321	HMDB60658	5.28e-07	0.000288461	0.998541	1	1
met37033	carbamazepine	Xenobiotics	Drug - Neurological	37033	100001933	HMDB14704	1.75e-05	0.001649	0.991588	1	1
met38686	gabapentin	Xenobiotics	Drug - Neurological	38686	100002806	HMDB05015	-1.42e-05	0.00126129	0.991163	1	1
met42450	1-stearoyl-2-arachidonoyl-GPC (18:0/20:4)	Lipid	Phosphatidylcholine (PC)	42450	100001869	HMDB08048	0.000324724	0.0246699	0.989513	1	1
met42463	sphingomyelin (d18:1/14:0, d16:1/16:0)*	Lipid	Sphingolipid Metabolism	42463	100004328	HMDB12097	0.00141204	0.0399728	0.971864	1	1
met47031	2-methoxyacetaminophen sulfate*	Xenobiotics	Drug - Analgesics, Anesthetics	47031	100001793		0.000774487	0.119759	0.994845	1	1
met47153	sphingomyelin (d18:1/24:1, d18:2/24:0)*	Lipid	Sphingolipid Metabolism	47153	100005986	HMDB12107	0.00109267	0.0313414	0.97223	1	1
met47441	X - 13737			47441			0.00157395	0.0728524	0.982792	1	1
met48680	N-acetyl sulfapyridine	Xenobiotics	Drug - Antibiotic	48680	100006229		-4.41e-14	1.12e-08	1	1	1
met49529	X - 23652			49529			0.00452411	0.0908009	0.960331	1	1
met52357	O-desmethyltramadol glucuronide	Xenobiotics	Drug - Analgesics, Anesthetics	52357	100006383		-4.4e-15	1.58e-08	1	1	1
met52462	1-palmitoyl-2-arachidonoyl-GPC (16:0/20:4n6)	Lipid	Phosphatidylcholine (PC)	52462	100008914	HMDB07982	0.000644392	0.0237493	0.978386	1	1
met53239	O-desmethyltramadol	Xenobiotics	Drug - Analgesics, Anesthetics	53239	100006382	HMDB60997	-4.4e-15	1.58e-08	1	1	1
met54762	lamotrigine	Xenobiotics	Drug - Neurological	54762	100009390	HMDB14695,HMDB05043	-3.22e-11	5.01e-07	0.99995	1	1

## Sheet: Plasma
Supplementary Table S2. Associations between smoking status and metabolomics. Each linear mixed model included a random intercept for the family and individual and a random slope for age. The outcome was a metabolite and smoking status, sex, race, education level, practice effect.
and linear, and quadratic terms for age were predictive variables. Also, we adjusted for CES-D, BMI, and weekly alcohol consumption.
Metabolite ID	Biochemical name	Super-pathway	Sub-pathway	chemical_id	HMBD ID	Estimate	SE	p-value	Bonferroni p-value	FDR p-value
met47154	sphingomyelin (d18:2/14:0, d18:1/14:1)*	Lipid	Sphingolipid Metabolism	100005985		0.222457	0.00815495	2.4e-127	2.73e-124	2.73e-124
met57480	sphingomyelin (d18:2/21:0, d16:2/23:0)*	Lipid	Sphingolipid Metabolism	100015790		0.169193	0.00703214	2.12e-104	2.42e-101	1.21e-101
met43488	N-acetylcarnosine	Amino Acid	Histidine Metabolism	100004046	HMDB12881	-0.247684	0.0109525	1.92e-94	2.18e-91	7.27e-92
met57483	sphingomyelin (d17:2/16:0, d18:2/15:0)*	Lipid	Sphingolipid Metabolism	100015793		0.181212	0.00833703	1.78e-88	2.02e-85	5.05e-86
met46225	pyroglutamine*	Amino Acid	Glutamate Metabolism	100001540		-0.290986	0.0137098	6.43e-85	7.32e-82	1.46e-82
met15122	glycerol	Lipid	Glycerolipid Metabolism	1254	HMDB00131	0.221115	0.0104986	1.02e-83	1.16e-80	1.94e-81
met1125	isoleucine	Amino Acid	Leucine, Isoleucine and Valine Metabolism	376	HMDB00172	-0.0753572	0.00388051	1.33e-72	1.51e-69	2.16e-70
met60	leucine	Amino Acid	Leucine, Isoleucine and Valine Metabolism	397	HMDB00687	-0.0702432	0.00363739	4.19e-72	4.77e-69	5.97e-70
met57482	sphingomyelin (d18:2/23:1)*	Lipid	Sphingolipid Metabolism	100015791		0.145628	0.00764635	1.35e-70	1.53e-67	1.7e-68
met37190	5alpha-androstan-3beta,17beta-diol disulfate	Lipid	Androgenic Steroids	100001987	HMDB00493	-0.535663	0.0281136	3.3e-70	3.75e-67	3.75e-68
met513	creatinine	Amino Acid	Creatine Metabolism	275	HMDB00562	-0.0712161	0.00377477	1.46e-69	1.66e-66	1.51e-67
met37209	androstenediol (3alpha, 17alpha) monosulfate (3)	Lipid	Androgenic Steroids	100002027		-0.379925	0.020497	3.36e-67	3.83e-64	3.19e-65
met52435	sphingomyelin (d18:2/23:0, d18:1/23:1, d17:1/24:1)*	Lipid	Sphingolipid Metabolism	100008956		0.124288	0.00702493	2.96e-62	3.37e-59	2.59e-60
met22132	alpha-hydroxyisocaproate	Amino Acid	Leucine, Isoleucine and Valine Metabolism	100000706	HMDB00746	-0.144662	0.00844259	1.05e-58	1.2e-55	8.56e-57
met36747	deoxycarnitine	Lipid	Carnitine Metabolism	100001662	HMDB01161	-0.0887256	0.00528461	7.06e-57	8.04e-54	5.36e-55
met27718	creatine	Amino Acid	Creatine Metabolism	1221	HMDB00064	0.176087	0.0107522	1.9e-54	2.17e-51	1.32e-52
met52788	X - 24471	Pathway missing	Pathway missing			-0.0601202	0.00367045	1.98e-54	2.25e-51	1.32e-52
met57715	pregnenetriol sulfate*	Lipid	Pregnenolone Steroids	100021103		-0.253293	0.0154994	3.85e-54	4.38e-51	2.43e-52
met32418	myristoleate (14:1n5)	Lipid	Long Chain Fatty Acid	100001198	HMDB02000	0.232627	0.014331	1.43e-53	1.63e-50	8.59e-52
met62152	sphingomyelin (d17:1/14:0, d16:1/15:0)*	Lipid	Sphingolipid Metabolism	100020276		0.160032	0.0100362	6.39e-52	7.27e-49	3.63e-50
met22116	4-methyl-2-oxopentanoate	Amino Acid	Leucine, Isoleucine and Valine Metabolism	100000551	HMDB00695	-0.0902283	0.00581719	2.08e-49	2.37e-46	1.13e-47
met52524	X - 24328	Pathway missing	Pathway missing			-0.286467	0.0185251	9.03e-49	1.03e-45	4.67e-47
met37529	sphingomyelin (d18:1/18:1, d18:2/18:0)	Lipid	Sphingolipid Metabolism	100002106	HMDB12101	0.0849878	0.00557222	4.64e-48	5.28e-45	2.3e-46
met15676	3-methyl-2-oxovalerate	Amino Acid	Leucine, Isoleucine and Valine Metabolism	100000036	HMDB03736	-0.0876178	0.00578628	2.65e-47	3.02e-44	1.26e-45
met33447	palmitoleate (16:1n7)	Lipid	Long Chain Fatty Acid	452	HMDB03229	0.232368	0.0154573	9.09e-47	1.03e-43	4.14e-45
met40097	N,N,N-trimethyl-alanylproline betaine (TMAP)	Amino Acid	Urea cycle; Arginine and Proline Metabolism	100020217		-0.090545	0.006137	3.07e-45	3.5e-42	1.34e-43
met52437	sphingomyelin (d18:2/24:1, d18:1/24:2)*	Lipid	Sphingolipid Metabolism	100008957		0.0701888	0.0047662	4.56e-45	5.18e-42	1.92e-43
met48460	propyl 4-hydroxybenzoate sulfate	Xenobiotics	Benzoate Metabolism	100006264		1.60875	0.109298	5.14e-45	5.85e-42	2.09e-43
met15681	4-guanidinobutanoate	Amino Acid	Guanidino and Acetamido Metabolism	100000096	HMDB03464	-0.311243	0.0211824	6.65e-45	7.57e-42	2.61e-43
met32619	pregn steroid monosulfate C21H34O5S*	Lipid	Pregnenolone Steroids	100002067		-0.249856	0.017048	8.38e-45	9.54e-42	3.18e-43
met48491	sphingomyelin (d18:1/20:1, d18:2/20:0)*	Lipid	Sphingolipid Metabolism	100006292		0.0803961	0.005597	2.92e-43	3.32e-40	1.07e-41
met22130	phenyllactate (PLA)	Amino Acid	Phenylalanine Metabolism	100000774	HMDB00779	-0.121143	0.00857402	5.81e-42	6.61e-39	2.07e-40
met57475	sphingomyelin (d18:1/19:0, d19:1/18:0)*	Lipid	Sphingolipid Metabolism	100015787		0.0997923	0.0071488	4.32e-41	4.91e-38	1.49e-39
met48493	sphingomyelin (d18:1/22:1, d18:2/22:0, d16:1/24:1)*	Lipid	Sphingolipid Metabolism	100006295	HMDB12104	0.0600776	0.00433836	1.75e-40	1.99e-37	5.86e-39
met32562	pregnen-diol disulfate C21H34O8S2*	Lipid	Pregnenolone Steroids	100001993		-0.261149	0.0191023	1.43e-39	1.62e-36	4.64e-38
met1604	urate	Nucleotide	Purine Metabolism, (Hypo)Xanthine/Inosine containing	1134	HMDB00289	-0.0758814	0.00557165	2.25e-39	2.57e-36	7.13e-38
met42459	sphingomyelin (d18:2/16:0, d18:1/16:1)*	Lipid	Sphingolipid Metabolism	100004329		0.0604497	0.00444488	3.13e-39	3.56e-36	9.62e-38
met18369	gamma-glutamylleucine	Peptide	Gamma-glutamyl Amino Acid	1268	HMDB11171	-0.0849348	0.00631145	2.14e-38	2.43e-35	6.4e-37
met52436	tricosanoyl sphingomyelin (d18:1/23:0)*	Lipid	Sphingolipid Metabolism	100008955	HMDB12105	0.0811448	0.00607368	5.16e-38	5.87e-35	1.51e-36
met33968	5-dodecenoate (12:1n7)	Lipid	Medium Chain Fatty Acid	100001232	HMDB00529	0.193679	0.0145001	5.57e-38	6.34e-35	1.59e-36
met43802	guanidinoacetate	Amino Acid	Creatine Metabolism	344	HMDB00128	-0.0972232	0.0073245	1.51e-37	1.72e-34	4.2e-36
met37203	androstenediol (3beta,17beta) disulfate (2)	Lipid	Androgenic Steroids	100001994	HMDB03818	-0.234808	0.0177675	3.52e-37	4e-34	9.53e-36
met48429	methyl-4-hydroxybenzoate sulfate	Xenobiotics	Benzoate Metabolism	100006116		0.734347	0.055815	6.5e-37	7.39e-34	1.72e-35
met32197	3-(4-hydroxyphenyl)lactate	Amino Acid	Tyrosine Metabolism	240	HMDB00755	-0.108431	0.00826827	9.43e-37	1.07e-33	2.44e-35
met57477	sphingomyelin (d18:1/22:2, d18:2/22:1, d16:1/24:2)*	Lipid	Sphingolipid Metabolism	100006296		0.0947276	0.00730822	5.55e-36	6.31e-33	1.4e-34
met37192	5alpha-androstan-3beta,17beta-diol monosulfate (2)	Lipid	Androgenic Steroids	100002024		-0.482691	0.0373745	8.36e-36	9.51e-33	2.07e-34
met57479	sphingomyelin (d18:2/24:2)*	Lipid	Sphingolipid Metabolism	100015789		0.101884	0.00792835	1.79e-35	2.04e-32	4.34e-34
met37187	5alpha-androstan-3beta,17alpha-diol disulfate	Lipid	Androgenic Steroids	100002021		-0.524646	0.041998	1.01e-33	1.15e-30	2.4e-32
met38625	stearoyl ethanolamide	Lipid	Endocannabinoid	100002254	HMDB13078	0.108681	0.00869538	1.03e-33	1.17e-30	2.4e-32
met1302	methionine	Amino Acid	Methionine, Cysteine, SAM and Taurine Metabolism	415	HMDB00696	-0.0539914	0.00431109	1.18e-33	1.34e-30	2.69e-32
met37202	androstenediol (3beta,17beta) disulfate (1)	Lipid	Androgenic Steroids	100001992	HMDB03818	-0.26264	0.021056	1.54e-33	1.75e-30	3.43e-32
met1649	valine	Amino Acid	Leucine, Isoleucine and Valine Metabolism	566	HMDB00883	-0.0558918	0.00449142	1.9e-33	2.17e-30	4.17e-32
met46599	pregnenetriol disulfate*	Lipid	Pregnenolone Steroids	100021104		-0.243321	0.020087	7.06e-32	8.03e-29	1.52e-30
met61846	androsterone glucuronide	Lipid	Androgenic Steroids	100002761	HMDB02829	-0.36371	0.0299689	7.33e-32	8.34e-29	1.54e-30
met57481	sphingomyelin (d18:1/20:2, d18:2/20:1, d16:1/22:2)*	Lipid	Sphingolipid Metabolism	100006293		0.114247	0.00944729	7.95e-32	9.04e-29	1.64e-30
met18349	indolelactate	Amino Acid	Tryptophan Metabolism	100000463	HMDB00671	-0.100118	0.00831001	1.41e-31	1.61e-28	2.87e-30
met46738	3-formylindole	Xenobiotics	Food Component/Plant	100020219	HMDB29737	-0.0917597	0.00763853	2.43e-31	2.77e-28	4.86e-30
met37207	androstenediol (3alpha, 17alpha) monosulfate (2)	Lipid	Androgenic Steroids	100002026		-0.301789	0.0253195	5.24e-31	5.96e-28	1.03e-29
met44872	gamma-glutamylmethionine	Peptide	Gamma-glutamyl Amino Acid	100001313	HMDB29155	-0.0738406	0.00629164	4.64e-30	5.28e-27	8.94e-29
met33971	10-heptadecenoate (17:1n7)	Lipid	Long Chain Fatty Acid	100001278	HMDB60038	0.150485	0.013168	9.91e-29	1.13e-25	1.88e-27
met12129	beta-hydroxyisovalerate	Amino Acid	Leucine, Isoleucine and Valine Metabolism	1442	HMDB00754	-0.0895189	0.00786072	1.78e-28	2.03e-25	3.32e-27
met36746	2-hydroxy-3-methylvalerate	Amino Acid	Leucine, Isoleucine and Valine Metabolism	100001541	HMDB00317	-0.124517	0.0110592	5.69e-28	6.48e-25	1.04e-26
met33973	epiandrosterone sulfate	Lipid	Androgenic Steroids	100001287		-0.284535	0.0253276	9.92e-28	1.13e-24	1.79e-26
met52495	sphingomyelin (d18:1/21:0, d17:1/22:0, d16:1/23:0)*	Lipid	Sphingolipid Metabolism	100009025		0.0873946	0.0078201	1.3e-27	1.48e-24	2.32e-26
met57518	arachidonoylcarnitine (C20:4)	Lipid	Fatty Acid Metabolism(Acyl Carnitine)	100015837		-0.118701	0.010652	1.84e-27	2.09e-24	3.22e-26
met2137	biliverdin	Cofactors and Vitamins	Hemoglobin and Porphyrin Metabolism	250	HMDB01008	-0.129541	0.0117278	4.9e-27	5.57e-24	8.44e-26
met58	glycine	Amino Acid	Glycine, Serine and Threonine Metabolism	340	HMDB00123	0.0773043	0.00707823	1.57e-26	1.79e-23	2.67e-25
met22137	homoarginine	Amino Acid	Urea cycle; Arginine and Proline Metabolism	100000961	HMDB00670	-0.108213	0.00996809	3.07e-26	3.5e-23	5.15e-25
met47120	9-hydroxystearate	Lipid	Fatty Acid, Monohydroxy	100005834	HMDB61661	0.186766	0.0172314	3.6e-26	4.1e-23	5.94e-25
met34407	isovalerylcarnitine (C5)	Amino Acid	Leucine, Isoleucine and Valine Metabolism	100001393	HMDB00688	-0.114056	0.0106199	1e-25	1.14e-22	1.63e-24
met37211	androstenediol (3beta,17beta) monosulfate (1)	Lipid	Androgenic Steroids	100002028	HMDB03818	-0.243835	0.0227637	1.36e-25	1.54e-22	2.17e-24
met33969	stearidonate (18:4n3)	Lipid	Polyunsaturated Fatty Acid (n3 and n6)	100001229	HMDB06547	0.179323	0.016929	4.19e-25	4.77e-22	6.62e-24
met57652	hexadecadienoate (16:2n6)	Lipid	Polyunsaturated Fatty Acid (n3 and n6)	100009394	HMDB00477	0.14055	0.0132951	5.56e-25	6.33e-22	8.67e-24
met62059	N-acetyl-2-aminooctanoate*	Lipid	Fatty Acid, Amino	100020204	HMDB59745	-0.143085	0.0136999	1.8e-24	2.04e-21	2.76e-23
met54	tryptophan	Amino Acid	Tryptophan Metabolism	565	HMDB00929	-0.0428615	0.00412852	3.58e-24	4.08e-21	5.43e-23
met43493	formiminoglutamate	Amino Acid	Histidine Metabolism	100002500	HMDB00854	-0.209606	0.0202628	4.52e-24	5.14e-21	6.76e-23
met1365	myristate (14:0)	Lipid	Long Chain Fatty Acid	519	HMDB00806	0.116316	0.0112943	7.43e-24	8.45e-21	1.1e-22
met57	glutamate	Amino Acid	Glutamate Metabolism	561	HMDB00148	-0.113354	0.011163	2.93e-23	3.34e-20	4.28e-22
met38170	pregnenolone sulfate	Lipid	Pregnenolone Steroids	100002129	HMDB00774	-0.281398	0.0277887	3.59e-23	4.09e-20	5.18e-22
met47886	bilirubin (E,Z or Z,E)*	Cofactors and Vitamins	Hemoglobin and Porphyrin Metabolism	100001951	HMDB00488	-0.0990595	0.00988373	9.7e-23	1.1e-19	1.38e-21
met33959	N-acetyltryptophan	Amino Acid	Tryptophan Metabolism	100001254	HMDB13713	-0.129332	0.0129789	1.76e-22	2.01e-19	2.48e-21
met34035	linolenate [alpha or gamma; (18:3n3 or 6)]	Lipid	Polyunsaturated Fatty Acid (n3 and n6)	100001337	HMDB03073	0.131485	0.0132724	2.95e-22	3.36e-19	4.1e-21
met1498	N6,N6,N6-trimethyllysine	Amino Acid	Lysine Metabolism	189	HMDB01325	-0.0943497	0.00953193	3.49e-22	3.97e-19	4.78e-21
met2761	thyroxine	Amino Acid	Tyrosine Metabolism	1094	HMDB01918	0.0584525	0.00593556	4.81e-22	5.48e-19	6.52e-21
met62064	3-hydroxybutyroylglycine**	Lipid	Fatty Acid Metabolism(Acyl Glycine)	100020211		0.190509	0.0194058	7.01e-22	7.98e-19	9.39e-21
met53114	X - 24686	Pathway missing	Pathway missing			-0.117324	0.011965	8.81e-22	1e-18	1.17e-20
met32425	dehydroisoandrosterone sulfate (DHEA-S)	Lipid	Androgenic Steroids	100000792	HMDB01032	-0.179908	0.018463	1.32e-21	1.51e-18	1.73e-20
met52285	oleate/vaccenate (18:1)	Lipid	Long Chain Fatty Acid	100008930		0.093244	0.00963472	2.34e-21	2.66e-18	3.03e-20
met57453	glycosyl ceramide (d18:2/24:1, d18:1/24:2)*	Lipid	Ceramides	100015745		0.0906247	0.00937774	2.66e-21	3.03e-18	3.4e-20
met443	aspartate	Amino Acid	Alanine and Aspartate Metabolism	234	HMDB00191	-0.0756665	0.00783568	2.79e-21	3.18e-18	3.53e-20
met1105	linoleate (18:2n6)	Lipid	Polyunsaturated Fatty Acid (n3 and n6)	180	HMDB00673	0.0966864	0.0100277	3.26e-21	3.71e-18	4.07e-20
met46390	X - 11308	Pathway missing	Pathway missing			-0.120237	0.0124907	3.53e-21	4.01e-18	4.36e-20
met57474	sphingomyelin (d18:2/18:1)*	Lipid	Sphingolipid Metabolism	100015788		0.0767372	0.00797361	3.73e-21	4.24e-18	4.56e-20
met1645	laurate (12:0)	Lipid	Medium Chain Fatty Acid	181	HMDB00638	0.116259	0.0121138	4.83e-21	5.5e-18	5.79e-20
met46455	X - 21410	Pathway missing	Pathway missing			-0.470654	0.0490465	4.83e-21	5.5e-18	5.79e-20
met34457	gamma-glutamylisoleucine*	Peptide	Gamma-glutamyl Amino Acid	100001485	HMDB11170	-0.0951784	0.00992234	5.26e-21	5.98e-18	6.23e-20
met57521	dihomo-linolenoylcarnitine (20:3n3 or 6)*	Lipid	Fatty Acid Metabolism(Acyl Carnitine)	100015840		-0.0943431	0.00984812	5.34e-21	6.07e-18	6.26e-20
met43807	bilirubin (Z,Z)	Cofactors and Vitamins	Hemoglobin and Porphyrin Metabolism	1090	HMDB00054	-0.084273	0.00888308	1.29e-20	1.47e-17	1.5e-19
met57516	cerotoylcarnitine (C26)*	Lipid	Fatty Acid Metabolism(Acyl Carnitine)	100015835	HMDB06347	-0.0833243	0.00891652	4.37e-20	4.98e-17	5.03e-19
met15679	xanthurenate	Amino Acid	Tryptophan Metabolism	100000015	HMDB00881	-0.231086	0.0247394	5.08e-20	5.78e-17	5.78e-19
met42463	sphingomyelin (d18:1/14:0, d16:1/16:0)*	Lipid	Sphingolipid Metabolism	100004328	HMDB12097	0.0479909	0.00514653	5.4e-20	6.14e-17	6.08e-19
met52713	1-(1-enyl-palmitoyl)-2-palmitoleoyl-GPC (P-16:0/16:1)*	Lipid	Plasmalogen	100009160	HMDB11207	0.074195	0.0079688	5.91e-20	6.72e-17	6.59e-19
met63	cholesterol	Lipid	Sterol	266	HMDB00067	0.0560546	0.00603135	7.2e-20	8.2e-17	7.96e-19
met3141	betaine	Amino Acid	Glycine, Serine and Threonine Metabolism	799	HMDB00043	-0.050555	0.00546058	9.29e-20	1.06e-16	1.02e-18
met33949	gamma-glutamylglycine	Peptide	Gamma-glutamyl Amino Acid	100001294	HMDB11667	0.0815006	0.00887715	1.85e-19	2.11e-16	2.01e-18
met49517	X - 23641	Pathway missing	Pathway missing			-0.332763	0.0364329	2.89e-19	3.29e-16	3.1e-18
met19503	stearoyl sphingomyelin (d18:1/18:0)	Lipid	Sphingolipid Metabolism	1538	HMDB01348	0.0501077	0.00551345	4.27e-19	4.86e-16	4.54e-18
met587	gluconate	Xenobiotics	Food Component/Plant	338	HMDB00625	0.0718955	0.00796466	7.02e-19	7.98e-16	7.39e-18
met37186	5alpha-androstan-3alpha,17beta-diol monosulfate (1)	Lipid	Androgenic Steroids	100002018		-0.345877	0.0384144	8.69e-19	9.88e-16	9.07e-18
met52483	X - 24295	Pathway missing	Pathway missing			-0.0876459	0.00977417	1.23e-18	1.4e-15	1.27e-17
met48757	N-acetylkynurenine (2)	Amino Acid	Tryptophan Metabolism	100006378		-0.285476	0.0320359	1.89e-18	2.15e-15	1.94e-17
met46972	X - 21796	Pathway missing	Pathway missing			-0.075226	0.00844654	1.93e-18	2.2e-15	1.97e-17
met46906	X - 21737	Pathway missing	Pathway missing			0.508846	0.0572646	2.36e-18	2.68e-15	2.37e-17
met57756	X - 24972	Pathway missing	Pathway missing			0.362616	0.0410358	3.66e-18	4.16e-15	3.65e-17
met34397	1-arachidonylglycerol (20:4)	Lipid	Monoacylglycerol	100001433	HMDB11549	0.253795	0.0288473	4.88e-18	5.55e-15	4.83e-17
met47909	picolinoylglycine	Lipid	Fatty Acid Metabolism (Acyl Glycine)	100021198	HMDB59766	-0.190665	0.021665	4.92e-18	5.6e-15	4.83e-17
met38165	palmitoyl ethanolamide	Lipid	Endocannabinoid	1489	HMDB02100	0.0532316	0.00605269	5.07e-18	5.77e-15	4.93e-17
met52452	1-stearoyl-2-linoleoyl-GPC (18:0/18:2)*	Lipid	Phosphatidylcholine (PC)	100008980	HMDB08039	0.0327902	0.00374339	6.9e-18	7.86e-15	6.66e-17
met64	phenylalanine	Amino Acid	Phenylalanine Metabolism	460	HMDB00159	-0.0265825	0.00303487	6.97e-18	7.93e-15	6.67e-17
met42109	phosphate	Energy	Oxidative Phosphorylation	461	HMDB01429	0.0517402	0.00591544	8.77e-18	9.98e-15	8.31e-17
met35132	3-methylcytidine	Nucleotide	Pyrimidine Metabolism, Cytidine containing	100001466		-0.0826154	0.00948009	1.01e-17	1.15e-14	9.5e-17
met44878	methionine sulfone	Amino Acid	Methionine, Cysteine, SAM and Taurine Metabolism	100004635		0.0899597	0.0103573	1.25e-17	1.42e-14	1.16e-16
met52865	X - 24544	Pathway missing	Pathway missing			-0.218117	0.0251974	1.66e-17	1.89e-14	1.54e-16
met27710	N-acetylglycine	Amino Acid	Glycine, Serine and Threonine Metabolism	100001006	HMDB00532	0.112425	0.013029	2.05e-17	2.34e-14	1.88e-16
met40730	imidazole propionate	Amino Acid	Histidine Metabolism	100003434	HMDB02271	-0.159203	0.0184924	2.35e-17	2.67e-14	2.14e-16
met47153	sphingomyelin (d18:1/24:1, d18:2/24:0)*	Lipid	Sphingolipid Metabolism	100005986	HMDB12107	0.048635	0.00569704	4.32e-17	4.92e-14	3.9e-16
met52465	1-palmitoyl-2-docosahexaenoyl-GPE (16:0/22:6)*	Lipid	Phosphatidylethanolamine (PE)	100008991	HMDB05324	0.125061	0.0147321	6.14e-17	6.99e-14	5.51e-16
met37506	palmitoyl sphingomyelin (d18:1/16:0)	Lipid	Sphingolipid Metabolism	100002107		0.0295047	0.0034865	7.66e-17	8.72e-14	6.81e-16
met1898	proline	Amino Acid	Urea cycle; Arginine and Proline Metabolism	480	HMDB00162	-0.0538191	0.00636802	8.69e-17	9.88e-14	7.66e-16
met38102	oleoyl ethanolamide	Lipid	Endocannabinoid	1137	HMDB02088	0.0964209	0.0114313	9.48e-17	1.08e-13	8.29e-16
met53195	1-myristoyl-2-arachidonoyl-GPC (14:0/20:4)*	Lipid	Phosphatidylcholine (PC)	100009139	HMDB07883	0.101711	0.0120988	1.22e-16	1.38e-13	1.06e-15
met57461	argininate*	Amino Acid	Urea cycle; Arginine and Proline Metabolism	100002769	HMDB03148	-0.0974249	0.0116748	2.04e-16	2.32e-13	1.76e-15
met42398	1-stearoyl-GPE (18:0)	Lipid	Lysophospholipid	100001461	HMDB11130	0.0639556	0.00767778	2.29e-16	2.61e-13	1.96e-15
met46460	X - 11444	Pathway missing	Pathway missing			-0.103284	0.0124552	3.15e-16	3.58e-13	2.67e-15
met54977	X - 24870	Pathway missing	Pathway missing			0.0512131	0.00622167	4.91e-16	5.58e-13	4.14e-15
met46594	X - 11372	Pathway missing	Pathway missing			-0.0962645	0.0117315	6.02e-16	6.86e-13	5.04e-15
met52867	X - 24546	Pathway missing	Pathway missing			-0.315086	0.0388406	1.22e-15	1.39e-12	1.01e-14
met31591	androsterone sulfate	Lipid	Androgenic Steroids	100001073	HMDB02759	-0.209876	0.02596	1.69e-15	1.92e-12	1.39e-14
met47901	sulfate of piperine metabolite C18H21NO3 (1)*	Xenobiotics	Food Component/Plant	100020502		-0.320128	0.0397025	1.83e-15	2.09e-12	1.5e-14
met566	phenylpyruvate	Amino Acid	Phenylalanine Metabolism	241	HMDB00205	-0.101055	0.0125271	1.98e-15	2.25e-12	1.61e-14
met1361	pentadecanoate (15:0)	Lipid	Long Chain Fatty Acid	980	HMDB00826	0.0603442	0.00752673	2.66e-15	3.03e-12	2.15e-14
met53127	X - 24699	Pathway missing	Pathway missing			-0.0756604	0.00944789	2.77e-15	3.15e-12	2.22e-14
met57365	myristoyl dihydrosphingomyelin (d18:0/14:0)*	Lipid	Sphingolipid Metabolism	100009038	HMDB12085	0.0596136	0.00745199	3.05e-15	3.48e-12	2.43e-14
met52447	1-stearoyl-2-arachidonoyl-GPE (18:0/20:4)	Lipid	Phosphatidylethanolamine (PE)	100008977	HMDB09003	0.0781501	0.00977535	3.09e-15	3.51e-12	2.44e-14
met52478	1-(1-enyl-palmitoyl)-2-oleoyl-GPC (P-16:0/18:1)*	Lipid	Plasmalogen	100009007		0.0581163	0.00728366	3.47e-15	3.95e-12	2.72e-14
met46603	X - 11530	Pathway missing	Pathway missing			-0.115726	0.0145416	4.13e-15	4.7e-12	3.22e-14
met44656	isovalerate (i5:0)	Amino Acid	Leucine, Isoleucine and Valine Metabolism	100000708	HMDB00718	-0.130197	0.0164012	4.51e-15	5.13e-12	3.49e-14
met54877	X - 24849	Pathway missing	Pathway missing			-0.113484	0.0143149	5.24e-15	5.96e-12	4e-14
met57564	perfluorooctanesulfonic acid (PFOS)	Xenobiotics	Chemical	100010955	HMDB59586	-0.146945	0.0185345	5.2e-15	5.92e-12	4e-14
met32504	docosapentaenoate (n3 DPA; 22:5n3)	Lipid	Polyunsaturated Fatty Acid (n3 and n6)	100001181	HMDB06528	0.114258	0.0144738	6.68e-15	7.6e-12	5.07e-14
met32452	propionylcarnitine (C3)	Lipid	Fatty Acid Metabolism (also BCAA Metabolism)	100001162	HMDB00824	-0.0611208	0.00783571	1.38e-14	1.57e-11	1.04e-13
met46409	X - 21364	Pathway missing	Pathway missing			-0.126141	0.0162255	1.73e-14	1.97e-11	1.3e-13
met37752	13-HODE + 9-HODE	Lipid	Fatty Acid, Monohydroxy	100002196		0.122607	0.0157808	1.78e-14	2.02e-11	1.32e-13
met52544	GlcNAc sulfate conjugate of C21H34O2 steroid**	Partially Characterized Molecules	Partially Characterized Molecules	100021726		-0.308847	0.0402469	3.47e-14	3.95e-11	2.56e-13
met46223	linoleoylcarnitine (C18:2)*	Lipid	Fatty Acid Metabolism(Acyl Carnitine)	100003151	HMDB06469	-0.0599321	0.00781604	3.63e-14	4.14e-11	2.67e-13
met57421	glycosyl-N-behenoyl-sphingadienine (d18:2/22:0)*	Lipid	Ceramides	100015625		0.0668115	0.00872467	3.95e-14	4.5e-11	2.88e-13
met46618	tetradecadienoate (14:2)*	Lipid	Long Chain Polyunsaturated Fatty Acid (n3 and n6)	100020343	HMDB00560	0.103333	0.013496	4e-14	4.55e-11	2.9e-13
met19324	1-stearoyl-GPI (18:0)	Lipid	Lysophospholipid	100000656	HMDB61696	0.0979131	0.0127939	4.16e-14	4.74e-11	3e-13
met35718	dihomo-linolenate (20:3n3 or n6)	Lipid	Polyunsaturated Fatty Acid (n3 and n6)	100001739	HMDB02925	0.0687263	0.00909054	8.23e-14	9.37e-11	5.89e-13
met1432	2-hydroxyphenylacetate	Amino Acid	Tyrosine Metabolism	235	HMDB00669	-0.176405	0.0233699	8.94e-14	1.02e-10	6.36e-13
met15685	5-hydroxylysine	Amino Acid	Lysine Metabolism	100000054	HMDB00450	0.133359	0.0176905	9.31e-14	1.06e-10	6.58e-13
met1642	caprate (10:0)	Lipid	Medium Chain Fatty Acid	888	HMDB00511	0.081982	0.0108895	1.03e-13	1.17e-10	7.21e-13
met1417	kynurenate	Amino Acid	Tryptophan Metabolism	98	HMDB00715	-0.0706174	0.00938729	1.06e-13	1.2e-10	7.37e-13
met47872	X - 17340	Pathway missing	Pathway missing			-0.121421	0.0161416	1.07e-13	1.21e-10	7.41e-13
met35436	hexanoylglycine	Lipid	Fatty Acid Metabolism(Acyl Glycine)	100001527	HMDB00701	0.274044	0.0364949	1.18e-13	1.35e-10	8.17e-13
met49681	X - 23782	Pathway missing	Pathway missing			0.089907	0.0119718	1.21e-13	1.38e-10	8.32e-13
met48067	branched-chain, straight-chain, or cyclopropyl 12:1 fatty acid*	Partially Characterized Molecules	Partially Characterized Molecules	100021709		0.11755	0.0157094	1.43e-13	1.62e-10	9.72e-13
met57528	adrenoylcarnitine (C22:4)*	Lipid	Fatty Acid Metabolism(Acyl Carnitine)	100015850		-0.19701	0.0264061	1.68e-13	1.91e-10	1.14e-12
met62101	alpha-ketoglutaramate**	Amino Acid	Glutamate Metabolism	100002397		-0.0460941	0.00617901	1.7e-13	1.94e-10	1.15e-12
met57718	X - 24951	Pathway missing	Pathway missing			-0.131001	0.0175753	1.82e-13	2.07e-10	1.22e-12
met46662	X - 15492	Pathway missing	Pathway missing			-0.0941941	0.0126936	2.32e-13	2.64e-10	1.54e-12
met57473	sphingomyelin (d18:0/18:0, d19:0/17:0)*	Lipid	Sphingolipid Metabolism	100009027	HMDB12087	0.0820852	0.0110898	2.57e-13	2.93e-10	1.7e-12
met33972	10-nonadecenoate (19:1n9)	Lipid	Long Chain Fatty Acid	100001277	HMDB13622	0.0910511	0.0123281	2.9e-13	3.3e-10	1.91e-12
met52433	sphingomyelin (d17:1/16:0, d18:1/15:0, d16:1/17:0)*	Lipid	Sphingolipid Metabolism	100006314		0.0453374	0.00616952	3.71e-13	4.22e-10	2.42e-12
met52466	1-stearoyl-2-docosahexaenoyl-GPE (18:0/22:6)*	Lipid	Phosphatidylethanolamine (PE)	100008992	HMDB05334	0.12486	0.01702	4.13e-13	4.7e-10	2.68e-12
met52615	sphingomyelin (d18:1/17:0, d17:1/18:0, d19:1/16:0)	Lipid	Sphingolipid Metabolism	100008920		0.0437649	0.00598382	4.82e-13	5.49e-10	3.12e-12
met32586	bilirubin (E,E)*	Cofactors and Vitamins	Hemoglobin and Porphyrin Metabolism	100001950		-0.0995479	0.013621	5.02e-13	5.72e-10	3.22e-12
met46914	X - 11522	Pathway missing	Pathway missing			-0.105084	0.0143797	5.03e-13	5.73e-10	3.22e-12
met1336	palmitate (16:0)	Lipid	Long Chain Fatty Acid	424	HMDB00220	0.0533969	0.00730744	5.12e-13	5.82e-10	3.23e-12
met46115	21-hydroxypregnenolone disulfate	Lipid	Pregnenolone Steroids	100001999		-0.130548	0.0178657	5.11e-13	5.81e-10	3.23e-12
met33950	N-acetylphenylalanine	Amino Acid	Phenylalanine Metabolism	100001256	HMDB00512	-0.0877731	0.0120274	5.52e-13	6.28e-10	3.47e-12
met46608	X - 11880	Pathway missing	Pathway missing			-0.0932305	0.0128091	6.21e-13	7.06e-10	3.88e-12
met52623	1-stearoyl-2-oleoyl-GPG (18:0/18:1)	Lipid	Phosphatidylglycerol (PG)	100001866		0.0684044	0.0094457	8.17e-13	9.3e-10	5.08e-12
met1107	allantoin	Nucleotide	Purine Metabolism, (Hypo)Xanthine/Inosine containing	1002	HMDB00462	-0.03081	0.00431972	1.73e-12	1.97e-09	1.07e-11
met52464	1-palmitoyl-2-arachidonoyl-GPE (16:0/20:4)*	Lipid	Phosphatidylethanolamine (PE)	100008990	HMDB05323	0.0797014	0.0111757	1.73e-12	1.96e-09	1.07e-11
met46707	X - 17653	Pathway missing	Pathway missing			-0.120675	0.0169197	1.8e-12	2.05e-09	1.1e-11
met39831	eicosanodioate (C20-DC)	Lipid	Fatty Acid, Dicarboxylate	100002951		-0.0830839	0.0117164	2.38e-12	2.71e-09	1.45e-11
met52234	glycosyl-N-stearoyl-sphingosine (d18:1/18:0)	Lipid	Ceramides	100001882		0.0663511	0.00936848	2.48e-12	2.82e-09	1.5e-11
met47013	X - 16570	Pathway missing	Pathway missing			0.121564	0.0171852	2.63e-12	2.99e-09	1.58e-11
met43343	2-aminooctanoate	Lipid	Fatty Acid, Amino	100004227	HMDB00991	-0.103649	0.0146631	2.66e-12	3.03e-09	1.6e-11
met46733	3-decenoylcarnitine	Lipid	Fatty Acid Metabolism (Acyl Carnitine, Monounsaturated)	100021136		-0.270867	0.0387215	4.45e-12	5.07e-09	2.65e-11
met1549	3-hydroxyisobutyrate	Amino Acid	Leucine, Isoleucine and Valine Metabolism	111	HMDB00336	-0.0736147	0.0105984	6.42e-12	7.31e-09	3.79e-11
met52909	X - 24588	Pathway missing	Pathway missing			-0.0692275	0.00996934	6.4e-12	7.28e-09	3.79e-11
met46493	X - 21448	Pathway missing	Pathway missing			-0.117426	0.0169748	7.49e-12	8.53e-09	4.39e-11
met61868	1-ribosyl-imidazoleacetate*	Amino Acid	Histidine Metabolism	100001668	HMDB02331	-0.0688771	0.00999102	8.83e-12	1e-08	5.15e-11
met57417	N-stearoyl-sphingadienine (d18:2/18:0)*	Lipid	Ceramides	100015632		0.178924	0.0261242	1.21e-11	1.37e-08	7.01e-11
met37058	succinylcarnitine (C4-DC)	Energy	TCA Cycle	100001948	HMDB61717	-0.0504597	0.00740516	1.51e-11	1.72e-08	8.73e-11
met33937	alpha-hydroxyisovalerate	Amino Acid	Leucine, Isoleucine and Valine Metabolism	100001300	HMDB00407	-0.0824912	0.0121411	1.74e-11	1.98e-08	1e-10
met47441	(S)-a-amino-omega-caprolactam	Xenobiotics	Food Component/Plant	100021329		-0.0564215	0.00830559	1.83e-11	2.09e-08	1.05e-10
met57443	ceramide (d18:2/24:1, d18:1/24:2)*	Lipid	Ceramides	100015744		0.0534015	0.00791147	2.33e-11	2.65e-08	1.33e-10
met46364	X - 12847	Pathway missing	Pathway missing			-0.260945	0.038678	2.4e-11	2.73e-08	1.36e-10
met34409	stearoylcarnitine (C18)	Lipid	Fatty Acid Metabolism(Acyl Carnitine)	100001391	HMDB00848	-0.0540173	0.00801465	2.5e-11	2.84e-08	1.41e-10
met46384	X - 21339	Pathway missing	Pathway missing			-0.103787	0.0154523	2.88e-11	3.27e-08	1.6e-10
met48492	behenoyl sphingomyelin (d18:1/22:0)*	Lipid	Sphingolipid Metabolism	100006294	HMDB12103	0.0342134	0.00509274	2.85e-11	3.25e-08	1.6e-10
met52925	phenylacetylglutamate	Peptide	Acetylated Peptides	100009045	HMDB59772	0.200745	0.0299553	3.3e-11	3.75e-08	1.83e-10
met2125	taurine	Amino Acid	Methionine, Cysteine, SAM and Taurine Metabolism	512	HMDB00251	0.0456449	0.00682967	3.55e-11	4.05e-08	1.96e-10
met33140	X - 11795	Pathway missing	Pathway missing			-0.106787	0.0160128	4.01e-11	4.56e-08	2.2e-10
met46548	3-methylglutarylcarnitine (2)	Amino Acid	Leucine, Isoleucine and Valine Metabolism	100005850	HMDB00552	0.122051	0.0183059	4.02e-11	4.58e-08	2.2e-10
met43400	2-piperidinone	Xenobiotics	Food Component/Plant	100004295	HMDB11749	-0.15411	0.0231549	4.38e-11	4.99e-08	2.39e-10
met5086	dimethylglycine	Amino Acid	Glycine, Serine and Threonine Metabolism	806	HMDB00092	-0.0535463	0.00809329	5.61e-11	6.38e-08	3.04e-10
met57476	sphingomyelin (d18:0/20:0, d16:0/22:0)*	Lipid	Sphingolipid Metabolism	100015786		0.0749582	0.0113825	6.88e-11	7.83e-08	3.71e-10
met3155	3-ureidopropionate	Nucleotide	Pyrimidine Metabolism, Uracil containing	1053	HMDB00026	-0.106987	0.0163298	8.53e-11	9.71e-08	4.58e-10
met52602	2'-deoxyuridine	Nucleotide	Pyrimidine Metabolism, Uracil containing	536	HMDB00012	-0.0705852	0.0107948	9.01e-11	1.03e-07	4.81e-10
met20694	oxalate (ethanedioate)	Cofactors and Vitamins	Ascorbate and Aldarate Metabolism	100000841	HMDB02329	0.0651876	0.00998213	9.86e-11	1.12e-07	5.24e-10
met34214	1-arachidonoyl-GPI (20:4)*	Lipid	Lysophospholipid	100001654	HMDB61690	0.0600499	0.0092163	1.08e-10	1.23e-07	5.71e-10
met52434	palmitoyl dihydrosphingomyelin (d18:0/16:0)*	Lipid	Sphingolipid Metabolism	100008954		0.0361556	0.00555645	1.13e-10	1.29e-07	5.96e-10
met35305	1-palmitoyl-GPI (16:0)	Lipid	Lysophospholipid	100001655	HMDB61695	0.149281	0.0231178	1.56e-10	1.78e-07	8.21e-10
met38168	16a-hydroxy DHEA 3-sulfate	Lipid	Androgenic Steroids	100002126		-0.160438	0.0250163	2.07e-10	2.36e-07	1.08e-09
met44675	docosahexaenoate (DHA; 22:6n3)	Lipid	Polyunsaturated Fatty Acid (n3 and n6)	100000665	HMDB02183	0.0923957	0.0144236	2.18e-10	2.48e-07	1.13e-09
met41220	2-stearoyl-GPE (18:0)*	Lipid	Lysophospholipid	100003901	HMDB11129	0.0564339	0.00882544	2.35e-10	2.67e-07	1.21e-09
met37059	malonylcarnitine	Lipid	Fatty Acid Synthesis	100001526	HMDB02095	-0.169654	0.0266436	2.78e-10	3.16e-07	1.43e-09
met36738	gamma-glutamylglutamate	Peptide	Gamma-glutamyl Amino Acid	331	HMDB11737	-0.0765847	0.012057	3.03e-10	3.45e-07	1.55e-09
met48772	cholic acid glucuronide	Lipid	Primary Bile Acid Metabolism	100020549		-0.274209	0.0433992	3.74e-10	4.25e-07	1.9e-09
met6146	2-aminoadipate	Amino Acid	Lysine Metabolism	381	HMDB00510	-0.16094	0.0254713	3.73e-10	4.24e-07	1.9e-09
met46517	X - 16946	Pathway missing	Pathway missing			-0.103861	0.0165504	4.89e-10	5.56e-07	2.47e-09
met57520	dihomo-linoleoylcarnitine (C20:2)*	Lipid	Fatty Acid Metabolism(Acyl Carnitine)	100015839		-0.0745109	0.0118728	4.91e-10	5.59e-07	2.47e-09
met33230	1-palmitoleoyl-GPC (16:1)*	Lipid	Lysophospholipid	100001511	HMDB10383	0.0500478	0.00797735	4.96e-10	5.64e-07	2.49e-09
met52983	glycochenodeoxycholate glucuronide (1)	Lipid	Primary Bile Acid Metabolism	100009264		-0.196656	0.0315849	6.66e-10	7.58e-07	3.33e-09
met57741	glycocholenate sulfate*	Lipid	Secondary Bile Acid Metabolism	100001989		-0.0714793	0.0114842	6.76e-10	7.69e-07	3.36e-09
met46616	X - 12411	Pathway missing	Pathway missing			-0.0987249	0.0158985	7.36e-10	8.37e-07	3.64e-09
met42092	N-palmitoylglycine	Lipid	Fatty Acid Metabolism(Acyl Glycine)	100003686	HMDB13034	0.0528492	0.00853322	8.24e-10	9.37e-07	4.06e-09
met46902	X - 21733	Pathway missing	Pathway missing			0.161179	0.0260497	8.47e-10	9.64e-07	4.15e-09
met46665	X - 15674	Pathway missing	Pathway missing			0.0988316	0.0159935	9.06e-10	1.03e-06	4.42e-09
met36594	1-linoleoyl-GPI (18:2)*	Lipid	Lysophospholipid	100001778		0.0666047	0.010843	1.11e-09	1.26e-06	5.36e-09
met46473	1-carboxyethylphenylalanine	Amino Acid	Phenylalanine Metabolism	100020419		-0.0765954	0.0124666	1.11e-09	1.26e-06	5.36e-09
met43829	gamma-glutamylvaline	Peptide	Gamma-glutamyl Amino Acid	100001126	HMDB11172	-0.0643406	0.0104966	1.2e-09	1.37e-06	5.79e-09
met42450	1-stearoyl-2-arachidonoyl-GPC (18:0/20:4)	Lipid	Phosphatidylcholine (PC)	100001869	HMDB08048	0.0294885	0.0048126	1.21e-09	1.37e-06	5.8e-09
met52690	1-linoleoyl-GPA (18:2)*	Lipid	Lysophospholipid	100009082	HMDB07856	0.160559	0.0264977	1.83e-09	2.08e-06	8.75e-09
met46261	X - 19438	Pathway missing	Pathway missing			-0.102362	0.0168879	1.86e-09	2.12e-06	8.86e-09
met46640	X - 15469	Pathway missing	Pathway missing			-0.0830039	0.0137822	2.29e-09	2.6e-06	1.08e-08
met1110	arachidonate (20:4n6)	Lipid	Polyunsaturated Fatty Acid (n3 and n6)	229	HMDB01043	0.0531157	0.00882745	2.37e-09	2.7e-06	1.12e-08
met52470	1-palmitoyl-2-palmitoleoyl-GPC (16:0/16:1)*	Lipid	Phosphatidylcholine (PC)	100008984	HMDB07969	0.0669521	0.0111385	2.45e-09	2.79e-06	1.15e-08
met32827	andro steroid monosulfate C19H28O6S (1)*	Lipid	Androgenic Steroids	100002152	HMDB02759	-0.203625	0.0343119	3.88e-09	4.41e-06	1.82e-08
met44526	3-methyl-2-oxobutyrate	Amino Acid	Leucine, Isoleucine and Valine Metabolism	100000936	HMDB00019	-0.0299147	0.00506223	4.52e-09	5.14e-06	2.11e-08
met15506	choline	Lipid	Phospholipid Metabolism	1256	HMDB00097	-0.0279542	0.00473114	4.58e-09	5.21e-06	2.13e-08
met45095	2-methylbutyrylcarnitine (C5)	Amino Acid	Leucine, Isoleucine and Valine Metabolism	100001509	HMDB00378	-0.0810797	0.0137594	4.97e-09	5.66e-06	2.29e-08
met47651	deoxycholic acid glucuronide	Lipid	Secondary Bile Acid Metabolism	100020550		-0.198051	0.0336155	4.96e-09	5.65e-06	2.29e-08
met52467	1-palmitoyl-2-arachidonoyl-GPI (16:0/20:4)*	Lipid	Phosphatidylinositol (PI)	100008993	HMDB09789	0.0740596	0.0125714	5e-09	5.69e-06	2.29e-08
met48490	sphingomyelin (d18:1/20:0, d16:1/22:0)*	Lipid	Sphingolipid Metabolism	100006290	HMDB12102	0.0273938	0.00465104	5.06e-09	5.76e-06	2.31e-08
met46681	X - 16935	Pathway missing	Pathway missing			-0.148039	0.0251945	5.51e-09	6.27e-06	2.51e-08
met57464	stearoylcholine*	Lipid	Fatty Acid Metabolism (Acyl Choline)	100015759		0.128079	0.0219451	6.87e-09	7.81e-06	3.11e-08
met44877	N-palmitoyl-sphingosine (d18:1/16:0)	Lipid	Ceramides	1518	HMDB04949	0.0354694	0.00607932	7.03e-09	8e-06	3.17e-08
met53209	1-oleoyl-2-docosahexaenoyl-GPE (18:1/22:6)*	Lipid	Phosphatidylethanolamine (PE)	100009220		0.195797	0.0335811	7.13e-09	8.12e-06	3.21e-08
met35136	5-methyluridine (ribothymidine)	Nucleotide	Pyrimidine Metabolism, Uracil containing	100001446	HMDB00884	-0.0358862	0.00615977	7.39e-09	8.41e-06	3.31e-08
met44664	glutarylcarnitine (C5-DC)	Amino Acid	Lysine Metabolism	100001593	HMDB13130	-0.0648292	0.0111411	7.66e-09	8.72e-06	3.42e-08
met33961	1-stearoyl-GPC (18:0)	Lipid	Lysophospholipid	100001271	HMDB10384	0.0298165	0.00513431	8.18e-09	9.31e-06	3.64e-08
met46515	X - 21470	Pathway missing	Pathway missing			-0.181394	0.0312646	8.47e-09	9.64e-06	3.74e-08
met53258	eicosapentaenoylcholine	Lipid	Fatty Acid Metabolism (Acyl Choline)	100009336		0.18626	0.0320967	8.44e-09	9.6e-06	3.74e-08
met57595	glycosyl ceramide (d18:1/20:0, d16:1/22:0)*	Lipid	Ceramides	100015882		0.0453632	0.00789781	1.19e-08	1.35e-05	5.21e-08
met33422	gamma-glutamylphenylalanine	Peptide	Gamma-glutamyl Amino Acid	100000491	HMDB00594	-0.0391226	0.00682247	1.25e-08	1.42e-05	5.47e-08
met52454	1-palmitoyl-2-dihomo-linolenoyl-GPC (16:0/20:3n3 or 6)*	Lipid	Phosphatidylcholine (PC)	100008985		0.0238769	0.00416997	1.3e-08	1.48e-05	5.68e-08
met46521	X - 11852	Pathway missing	Pathway missing			-0.283121	0.0494895	1.37e-08	1.55e-05	5.93e-08
met46590	X - 07765	Pathway missing	Pathway missing			-0.18358	0.0321442	1.46e-08	1.67e-05	6.33e-08
met52446	1-stearoyl-2-linoleoyl-GPE (18:0/18:2)*	Lipid	Phosphatidylethanolamine (PE)	100008976	HMDB08994	0.0642443	0.0113047	1.67e-08	1.9e-05	7.2e-08
met46503	X - 21458	Pathway missing	Pathway missing			-0.226565	0.039954	1.79e-08	2.04e-05	7.68e-08
met15716	imidazole lactate	Amino Acid	Histidine Metabolism	100000263	HMDB02320	-0.0504986	0.00896133	2.19e-08	2.49e-05	9.37e-08
met57517	ximenoylcarnitine (C26:1)*	Lipid	Fatty Acid Metabolism(Acyl Carnitine)	100015836		-0.0481609	0.00854806	2.21e-08	2.51e-05	9.41e-08
met1806	retinol (Vitamin A)	Cofactors and Vitamins	Vitamin A Metabolism	498	HMDB00305	-0.0351677	0.00624819	2.28e-08	2.59e-05	9.68e-08
met55072	2-oxoarginine*	Amino Acid	Urea cycle; Arginine and Proline Metabolism	100002784	HMDB04225	-0.105261	0.0187282	2.38e-08	2.71e-05	1.01e-07
met61867	octadecanedioylcarnitine (C18-DC)*	Lipid	Fatty Acid Metabolism(Acyl Carnitine)	100005998		-0.0863318	0.0154362	2.78e-08	3.16e-05	1.17e-07
met54805	3beta-hydroxy-5-cholestenoate	Lipid	Sterol	100006370		-0.0503914	0.00902698	2.96e-08	3.37e-05	1.24e-07
met32397	3-hydroxy-2-ethylpropionate	Amino Acid	Leucine, Isoleucine and Valine Metabolism	100001170	HMDB00396	-0.0450577	0.00807523	3.01e-08	3.43e-05	1.26e-07
met54979	N-stearoyl-sphingosine (d18:1/18:0)*	Lipid	Ceramides	1547	HMDB04950	0.0515389	0.00924117	3.03e-08	3.45e-05	1.26e-07
met46610	X - 12007	Pathway missing	Pathway missing			-0.177991	0.0320412	3.47e-08	3.95e-05	1.44e-07
met57463	linoleoylcholine*	Lipid	Fatty Acid Metabolism (Acyl Choline)	100015760		0.0979982	0.0176796	3.65e-08	4.15e-05	1.51e-07
met57714	X - 24947	Pathway missing	Pathway missing			-0.174721	0.0315195	3.66e-08	4.16e-05	1.51e-07
met41888	succinimide	Xenobiotics	Chemical	100003696		-0.184214	0.0331907	3.74e-08	4.25e-05	1.53e-07
met33132	X - 11787	Pathway missing	Pathway missing			-0.0274915	0.00496829	3.87e-08	4.4e-05	1.58e-07
met52286	X - 24243	Pathway missing	Pathway missing			-0.0936205	0.0169111	3.91e-08	4.45e-05	1.6e-07
met46260	2,3-dihydroxy-5-methylthio-4-pentenoate (DMTPA)*	Amino Acid	Methionine, Cysteine, SAM and Taurine Metabolism	100020893		-0.0344863	0.00624058	4.06e-08	4.62e-05	1.65e-07
met46600	sulfate of piperine metabolite C16H19NO3 (2)*	Xenobiotics	Food Component/Plant	100020496		-0.179007	0.0324213	4.13e-08	4.7e-05	1.67e-07
met1299	tyrosine	Amino Acid	Tyrosine Metabolism	815	HMDB00158	-0.0255662	0.00463358	4.26e-08	4.85e-05	1.72e-07
met17805	dihomo-linoleate (20:2n6)	Lipid	Polyunsaturated Fatty Acid (n3 and n6)	1231	HMDB05060	0.0635583	0.0115909	5.13e-08	5.84e-05	2.06e-07
met52697	1-oleoyl-2-docosahexaenoyl-GPC (18:1/22:6)*	Lipid	Phosphatidylcholine (PC)	100009130	HMDB08123	0.0384521	0.00703505	5.62e-08	6.4e-05	2.25e-07
met512	asparagine	Amino Acid	Alanine and Aspartate Metabolism	917	HMDB00168	-0.0206888	0.00378749	5.74e-08	6.53e-05	2.29e-07
met53261	arachidonoylcholine	Lipid	Fatty Acid Metabolism (Acyl Choline)	100009332		0.0947277	0.0173667	5.96e-08	6.79e-05	2.37e-07
met46911	X - 21742	Pathway missing	Pathway missing			0.313031	0.0575031	6.38e-08	7.26e-05	2.53e-07
met46621	2,4-di-tert-butylphenol	Pathway missing	Pathway missing			0.0799941	0.0147276	6.74e-08	7.67e-05	2.66e-07
met22185	N-acetylaspartate (NAA)	Amino Acid	Alanine and Aspartate Metabolism	100000787	HMDB00812	0.0228193	0.00420367	6.96e-08	7.92e-05	2.74e-07
met3147	xanthine	Nucleotide	Purine Metabolism, (Hypo)Xanthine/Inosine containing	1004	HMDB00292	-0.0515285	0.00959619	9.54e-08	0.00010854	3.73e-07
met57422	lactosyl-N-behenoyl-sphingosine (d18:1/22:0)*	Lipid	Sphingolipid Metabolism	100015623		0.0681427	0.0126853	9.52e-08	0.00010838	3.73e-07
met53263	docosahexaenoylcholine	Lipid	Fatty Acid Metabolism (Acyl Choline)	100009333		0.137047	0.0255542	9.87e-08	0.00011227	3.84e-07
met35631	1-palmitoyl-GPE (16:0)	Lipid	Lysophospholipid	100001567	HMDB11503	0.0428394	0.00800578	1.05e-07	0.00012001	4.1e-07
met57511	linolenoylcarnitine (C18:3)*	Lipid	Fatty Acid Metabolism(Acyl Carnitine)	100015831		-0.0490128	0.00917913	1.11e-07	0.00012688	4.32e-07
met1561	alpha-tocopherol	Cofactors and Vitamins	Tocopherol Metabolism	1105	HMDB01893	0.0351747	0.00658938	1.13e-07	0.00012913	4.38e-07
met43239	S-allylcysteine	Xenobiotics	Food Component/Plant	100004509	HMDB34323	-0.443958	0.08333	1.21e-07	0.00013716	4.63e-07
met17945	2-hydroxystearate	Lipid	Fatty Acid, Monohydroxy	1239		0.0294769	0.00555993	1.39e-07	0.0001578	5.31e-07
met46360	X - 11441	Pathway missing	Pathway missing			-0.131708	0.025109	1.84e-07	0.00020977	7.04e-07
met48994	branched-chain, straight-chain, or cyclopropyl 10:1 fatty acid (1)*	Partially Characterized Molecules	Partially Characterized Molecules	100021666		0.123651	0.0236545	2.05e-07	0.00023293	7.79e-07
met43378	S-methylcysteine sulfoxide	Amino Acid	Methionine, Cysteine, SAM and Taurine Metabolism	100002927	HMDB29432	0.0807034	0.0154412	2.06e-07	0.00023405	7.8e-07
met57720	X - 24953	Pathway missing	Pathway missing			-0.199379	0.0382525	2.2e-07	0.00025034	8.32e-07
met12261	taurodeoxycholate	Lipid	Secondary Bile Acid Metabolism	1668	HMDB00896	0.209769	0.0403376	2.35e-07	0.00026778	8.84e-07
met46695	X - 18913	Pathway missing	Pathway missing			-0.0701123	0.0134778	2.35e-07	0.00026714	8.84e-07
met48047	X - 18886	Pathway missing	Pathway missing			-0.126022	0.0242712	2.46e-07	0.00027996	9.21e-07
met48841	p-cresol-glucuronide*	Amino Acid	Tyrosine Metabolism	100006191	HMDB11686	0.184382	0.0355606	2.56e-07	0.00029145	9.56e-07
met43266	2-aminophenol sulfate	Xenobiotics	Chemical	100004322	HMDB61116	-0.187682	0.0361823	2.65e-07	0.00030112	9.84e-07
met49637	X - 23739	Pathway missing	Pathway missing			-0.0360084	0.00702385	3.51e-07	0.00039908	1.3e-06
met22842	cholate	Lipid	Primary Bile Acid Metabolism	136	HMDB00619	-0.214428	0.0420131	3.88e-07	0.0004417	1.43e-06
met1670	urea	Amino Acid	Urea cycle; Arginine and Proline Metabolism	533	HMDB00294	-0.0336102	0.00661893	4.45e-07	0.00050619	1.64e-06
met35114	7-methylguanine	Nucleotide	Purine Metabolism, Guanine containing	100001456	HMDB00897	-0.0237522	0.00469682	4.95e-07	0.00056347	1.81e-06
met46443	X - 11442	Pathway missing	Pathway missing			-0.123029	0.0243281	4.93e-07	0.00056048	1.81e-06
met594	nicotinamide	Cofactors and Vitamins	Nicotinate and Nicotinamide Metabolism	432	HMDB01406	-0.0655507	0.0129681	4.98e-07	0.00056631	1.82e-06
met48442	4-vinylguaiacol sulfate	Xenobiotics	Food Component/Plant	100006126		-0.510405	0.10101	5.09e-07	0.00057893	1.85e-06
met52135	X - 24106	Pathway missing	Pathway missing			0.0459683	0.0091113	5.37e-07	0.0006109	1.95e-06
met35127	pro-hydroxy-pro	Amino Acid	Urea cycle; Arginine and Proline Metabolism	100001167	HMDB06695	0.0514268	0.0101977	5.42e-07	0.00061684	1.96e-06
met35527	4-hydroxyhippurate	Xenobiotics	Benzoate Metabolism	100001423	HMDB13678	0.0892256	0.0177066	5.46e-07	0.0006208	1.96e-06
met42446	1-palmitoyl-2-linoleoyl-GPC (16:0/18:2)	Lipid	Phosphatidylcholine (PC)	1537	HMDB07973	0.0167051	0.00333051	6.11e-07	0.0006955	2.19e-06
met53231	thioproline	Xenobiotics	Chemical	100009232		-0.035632	0.00713795	6.9e-07	0.00078502	2.47e-06
met46588	metabolonic lactone sulfate	Partially Characterized Molecules	Partially Characterized Molecules	100021331		-0.116564	0.0234997	8.11e-07	0.00092321	2.89e-06
met46690	X - 18901	Pathway missing	Pathway missing			0.137204	0.027752	8.78e-07	0.00099929	3.12e-06
met33967	N-acetylisoleucine	Amino Acid	Leucine, Isoleucine and Valine Metabolism	100001276	HMDB61684	-0.0624241	0.0126409	9.05e-07	0.00102936	3.21e-06
met42382	S-adenosylhomocysteine (SAH)	Amino Acid	Methionine, Cysteine, SAM and Taurine Metabolism	197	HMDB00939	-0.11469	0.0232307	9.09e-07	0.00103454	3.21e-06
met42449	1-palmitoyl-2-linoleoyl-GPE (16:0/18:2)	Lipid	Phosphatidylethanolamine (PE)	100001870	HMDB05322	0.062189	0.0126032	9.19e-07	0.00104568	3.23e-06
met53260	oleoylcholine	Lipid	Fatty Acid Metabolism (Acyl Choline)	100009331		0.0929972	0.0188473	9.18e-07	0.00104516	3.23e-06
met52944	palmitoylcholine	Lipid	Fatty Acid Metabolism (Acyl Choline)	100009233		0.0843041	0.0171132	9.56e-07	0.00108797	3.35e-06
met1587	N-acetylleucine	Amino Acid	Leucine, Isoleucine and Valine Metabolism	1082	HMDB11756	-0.071436	0.0145596	1.07e-06	0.00121376	3.72e-06
met46595	X - 11378	Pathway missing	Pathway missing			-0.126137	0.0257438	1.09e-06	0.00124518	3.81e-06
met46986	X - 12812	Pathway missing	Pathway missing			0.184537	0.0377167	1.14e-06	0.00130047	3.95e-06
met57745	phenylacetate	Amino Acid	Phenylalanine Metabolism	100000011	HMDB00209	0.15377	0.031437	1.14e-06	0.00130022	3.95e-06
met44681	palmitoylcarnitine (C16)	Lipid	Fatty Acid Metabolism(Acyl Carnitine)	100000776	HMDB00222	-0.033753	0.00690212	1.15e-06	0.00130621	3.96e-06
met48782	C-glycosyltryptophan	Amino Acid	Tryptophan Metabolism	100006379		0.0317341	0.00648926	1.16e-06	0.00131995	3.99e-06
met44621	1-(1-enyl-oleoyl)-GPE (P-18:1)*	Lipid	Lysoplasmalogen	100005372		0.087898	0.0180294	1.24e-06	0.00141281	4.26e-06
met47787	1-methyl-5-imidazoleacetate	Amino Acid	Histidine Metabolism	100002910	HMDB04988	-0.115692	0.023858	1.41e-06	0.00160557	4.82e-06
met52297	ethyl alpha-glucopyranoside	Xenobiotics	Food Component/Plant	100015965		-0.209212	0.0432033	1.47e-06	0.00166814	4.99e-06
met46710	X - 17690	Pathway missing	Pathway missing			-0.214014	0.0442273	1.49e-06	0.00169296	5.05e-06
met1516	sarcosine	Amino Acid	Glycine, Serine and Threonine Metabolism	1023	HMDB00271	-0.0257667	0.00534292	1.62e-06	0.00184379	5.49e-06
met53262	dihomo-linolenoyl-choline	Lipid	Fatty Acid Metabolism (Acyl Choline)	100009335		0.129851	0.0270633	1.81e-06	0.00205673	6.1e-06
met37432	N-acetyl-beta-alanine	Nucleotide	Pyrimidine Metabolism, Uracil containing	100002102		-0.0532825	0.0111226	1.88e-06	0.00214437	6.34e-06
met46294	X - 21285	Pathway missing	Pathway missing			-0.211498	0.0442401	1.96e-06	0.00223446	6.59e-06
met18245	gamma-glutamylhistidine	Peptide	Gamma-glutamyl Amino Acid	1235		-0.0281299	0.00589415	2.05e-06	0.00233023	6.85e-06
met49228	3-indoleglyoxylic acid	Xenobiotics	Food Component/Plant	100020372		-0.0850469	0.0178285	2.07e-06	0.00235123	6.9e-06
met46510	X - 12544	Pathway missing	Pathway missing			-0.176515	0.0371269	2.24e-06	0.00254865	7.45e-06
met27513	indoleacetate	Amino Acid	Tryptophan Metabolism	100001034	HMDB00197	-0.0595194	0.0125775	2.49e-06	0.00283639	8.27e-06
met42087	indoleacetylglutamine	Amino Acid	Tryptophan Metabolism	100001731	HMDB13240	-0.154345	0.0326851	2.61e-06	0.00297458	8.65e-06
met62061	genistein sulfate*	Xenobiotics	Food Component/Plant	100020207		-0.312044	0.0664585	2.94e-06	0.00335123	9.71e-06
met18467	eicosapentaenoate (EPA; 20:5n3)	Lipid	Polyunsaturated Fatty Acid (n3 and n6)	2050	HMDB01999	0.0860791	0.0183335	2.98e-06	0.0033961	9.82e-06
met33587	eicosenoate (20:1)	Lipid	Long Chain Fatty Acid	100001335	HMDB02231	0.0574043	0.0122302	3.01e-06	0.0034232	9.87e-06
met27738	threonate	Cofactors and Vitamins	Ascorbate and Aldarate Metabolism	100001022	HMDB00943	0.0532951	0.0114007	3.3e-06	0.00376084	1.08e-05
met36098	4-vinylphenol sulfate	Xenobiotics	Benzoate Metabolism	100001755	HMDB04072	-0.123839	0.0265506	3.47e-06	0.00394901	1.13e-05
met35172	orotidine	Nucleotide	Pyrimidine Metabolism, Orotate containing	100001416	HMDB00788	-0.06447	0.013832	3.54e-06	0.00403228	1.15e-05
met1648	serine	Amino Acid	Glycine, Serine and Threonine Metabolism	503	HMDB00187	0.0240348	0.00519008	4.03e-06	0.00458951	1.31e-05
met1303	malate	Energy	TCA Cycle	409	HMDB00156	-0.0249892	0.00540195	4.15e-06	0.00472265	1.34e-05
met46997	X - 12822	Pathway missing	Pathway missing			-0.116615	0.0252859	4.43e-06	0.00504576	1.43e-05
met46601	X - 11470	Pathway missing	Pathway missing			-0.0771382	0.0167919	4.85e-06	0.00551825	1.55e-05
met57747	3-methylglutaconate	Amino Acid	Leucine, Isoleucine and Valine Metabolism	100002458	HMDB00522	0.056656	0.0123352	4.84e-06	0.00551111	1.55e-05
met57814	(N(1) + N(8))-acetylspermidine	Amino Acid	Polyamine Metabolism	100016038		-0.0800523	0.0174303	4.89e-06	0.00555972	1.56e-05
met46146	4-methylcatechol sulfate	Xenobiotics	Benzoate Metabolism	100004111		0.0927523	0.0203101	5.48e-06	0.00624169	1.75e-05
met31536	N-(2-furoyl)glycine	Xenobiotics	Food Component/Plant	100001086	HMDB00439	-0.472805	0.103592	5.57e-06	0.00633428	1.77e-05
met40703	prolylglycine	Peptide	Dipeptide	100003674	HMDB11178	-0.106051	0.0232606	5.7e-06	0.00648469	1.81e-05
met46968	decadienedioic acid (C10:2-DC)**	Lipid	Fatty Acid, Dicarboxylate	100021711		0.10775	0.0237959	6.54e-06	0.00744818	2.07e-05
met52633	palmitoyl-linoleoyl-glycerol (16:0/18:2) [1]*	Lipid	Diacylglycerol	100009052	HMDB07103	-0.126072	0.0278624	6.67e-06	0.00759219	2.1e-05
met46634	11beta-hydroxyandrosterone glucuronide	Lipid	Androgenic Steroids	100020541		-0.0813467	0.0180839	7.54e-06	0.00857992	2.37e-05
met46490	X - 17185	Pathway missing	Pathway missing			-0.157629	0.0350748	7.68e-06	0.00874092	2.4e-05
met57513	arachidoylcarnitine (C20)*	Lipid	Fatty Acid Metabolism(Acyl Carnitine)	100015833	HMDB06460	-0.0546815	0.012166	7.65e-06	0.00870571	2.4e-05
met52449	1-stearoyl-2-arachidonoyl-GPI (18:0/20:4)	Lipid	Phosphatidylinositol (PI)	100000616	HMDB09815	0.0358138	0.00797293	7.74e-06	0.00881033	2.41e-05
met36095	thymol sulfate	Xenobiotics	Food Component/Plant	100001757	HMDB01878	-0.279224	0.0622234	7.95e-06	0.00904783	2.47e-05
met1121	margarate (17:0)	Lipid	Long Chain Fatty Acid	891	HMDB02259	0.0434054	0.00972606	8.9e-06	0.0101229	2.76e-05
met31912	glycolithocholate	Lipid	Secondary Bile Acid Metabolism	100001064	HMDB00698	0.149311	0.0337347	1.05e-05	0.011974	3.25e-05
met57658	heneicosapentaenoate (21:5n3)	Lipid	Polyunsaturated Fatty Acid (n3 and n6)	100015797		0.207226	0.0469758	1.12e-05	0.0127648	3.46e-05
met46970	X - 17676	Pathway missing	Pathway missing			-0.0865609	0.0196252	1.13e-05	0.0128482	3.47e-05
met52462	1-palmitoyl-2-arachidonoyl-GPC (16:0/20:4n6)	Lipid	Phosphatidylcholine (PC)	100008914	HMDB07982	0.0222836	0.00506239	1.17e-05	0.0133076	3.59e-05
met53223	palmitoleoylcarnitine (C16:1)*	Lipid	Fatty Acid Metabolism(Acyl Carnitine)	100009406		0.0459603	0.0104705	1.24e-05	0.0141441	3.8e-05
met1769	cortisone	Lipid	Corticosteroids	273	HMDB02802	-0.0379358	0.00867661	1.35e-05	0.0153101	4.1e-05
met47652	eicosenedioate (C20:1-DC)*	Lipid	Fatty Acid, Dicarboxylate	100021105		-0.120592	0.0276721	1.43e-05	0.0162279	4.34e-05
met1563	chenodeoxycholate	Lipid	Primary Bile Acid Metabolism	1123	HMDB00518	-0.167509	0.0385322	1.5e-05	0.0170682	4.55e-05
met52611	1-stearoyl-2-docosahexaenoyl-GPC (18:0/22:6)	Lipid	Phosphatidylcholine (PC)	100008916	HMDB08057	0.0414155	0.00957876	1.66e-05	0.0189213	5.03e-05
met57512	margaroylcarnitine (C17)*	Lipid	Fatty Acid Metabolism(Acyl Carnitine)	100004054	HMDB06210	-0.0503684	0.0116682	1.72e-05	0.0196246	5.21e-05
met48728	daidzein sulfate (2)	Xenobiotics	Food Component/Plant	100006363		-0.307291	0.0713205	1.78e-05	0.0202821	5.37e-05
met52769	X - 24452	Pathway missing	Pathway missing			-0.0347572	0.0080763	1.83e-05	0.0208275	5.5e-05
met38296	17-methylstearate (i19:0)	Lipid	Fatty Acid, Branched	100002356	HMDB37397	0.0390582	0.00908029	1.84e-05	0.020972	5.52e-05
met57330	lignoceroyl sphingomyelin (d18:1/24:0)	Lipid	Sphingolipid Metabolism	100006298		0.0279745	0.0065231	1.94e-05	0.0221259	5.81e-05
met52461	1-palmitoyl-2-oleoyl-GPC (16:0/18:1)	Lipid	Phosphatidylcholine (PC)	1539	HMDB07972	0.019793	0.00462177	2e-05	0.022717	5.95e-05
met48351	N1-methylinosine	Nucleotide	Purine Metabolism, (Hypo)Xanthine/Inosine containing	100001409	HMDB02721	-0.0386003	0.00905236	2.18e-05	0.0247542	6.46e-05
met48255	arabonate/xylonate	Carbohydrate	Pentose Metabolism	100006115		0.0337587	0.00795957	2.4e-05	0.0273494	7.12e-05
met35675	2-hydroxypalmitate	Lipid	Fatty Acid, Monohydroxy	100001579	HMDB31057	0.0244931	0.00578896	2.52e-05	0.0286819	7.45e-05
met46655	taurodeoxycholic acid 3-sulfate	Lipid	Secondary Bile Acid Metabolism	100006644		0.168741	0.0400881	2.76e-05	0.0314386	8.14e-05
met590	hypotaurine	Amino Acid	Methionine, Cysteine, SAM and Taurine Metabolism	358	HMDB00965	-0.0888197	0.021127	2.83e-05	0.0322131	8.32e-05
met39837	docosadioate (C22-DC)	Lipid	Fatty Acid, Dicarboxylate	100002952		-0.0527892	0.0125664	2.87e-05	0.0326453	8.41e-05
met52450	1-palmitoyl-2-linoleoyl-GPI (16:0/18:2)	Lipid	Phosphatidylinositol (PI)	1528	HMDB09784	0.056102	0.0133616	2.89e-05	0.0329061	8.46e-05
met46643	1-carboxyethylvaline	Amino Acid	Leucine, Isoleucine and Valine Metabolism	100020423		-0.0640442	0.0153092	3.1e-05	0.035251	9.04e-05
met46904	tetradecadienedioate (C14:2-DC)*	Lipid	Fatty Acid, Dicarboxylate	100021100		0.105472	0.0252699	3.22e-05	0.0366588	9.38e-05
met52835	N-carbamoylvaline	Amino Acid	Leucine, Isoleucine and Valine Metabolism	100020351		-0.0704679	0.0168906	3.24e-05	0.0368828	9.41e-05
met1600	phosphoethanolamine	Lipid	Phospholipid Metabolism	1026	HMDB00224	0.0514199	0.0123272	3.25e-05	0.0370159	9.42e-05
met35101	beta-guanidinopropanoate	Xenobiotics	Food Component/Plant	100001411	HMDB13222	-0.470462	0.112888	3.32e-05	0.0377681	9.59e-05
met57655	2'-O-methyluridine	Nucleotide	Pyrimidine Metabolism, Uracil containing	100010896		-0.0576746	0.0138788	3.48e-05	0.0396096	0.00010028
met48989	(2,4 or 2,5)-dimethylphenol sulfate	Xenobiotics	Food Component/Plant	100020519		-0.166999	0.0402727	3.62e-05	0.0411758	0.00010398
met47112	etiocholanolone glucuronide	Lipid	Androgenic Steroids	100005403	HMDB04484	-0.121251	0.0292439	3.63e-05	0.0413116	0.00010406
met15140	kynurenine	Amino Acid	Tryptophan Metabolism	100000265	HMDB00684	-0.0258688	0.00624208	3.66e-05	0.0416374	0.00010462
met46628	glutamine conjugate of C6H10O2 (2)*	Partially Characterized Molecules	Partially Characterized Molecules	100020262		0.110707	0.0269018	4.14e-05	0.0470981	0.00011804
met34365	3-(cystein-S-yl)acetaminophen*	Xenobiotics	Drug - Analgesics, Anesthetics	100001797		0.298836	0.0728305	4.37e-05	0.0496759	0.00012419
met52916	2-hydroxylaurate	Lipid	Fatty Acid, Monohydroxy	100008934		-0.116003	0.028303	4.44e-05	0.0505331	0.00012602
met61833	5,6-dihydrouridine	Nucleotide	Pyrimidine Metabolism, Uracil containing	100001425		0.0248616	0.00606605	4.45e-05	0.0506594	0.00012602
met19258	1-myristoyl-2-palmitoyl-GPC (14:0/16:0)	Lipid	Phosphatidylcholine (PC)	100000672	HMDB07869	0.0536169	0.0131605	4.93e-05	0.0561438	0.00013931
met45404	N-acetylalliin	Xenobiotics	Food Component/Plant	100005367		-0.413599	0.101555	4.98e-05	0.0566199	0.00014015
met20675	1,5-anhydroglucitol (1,5-AG)	Carbohydrate	Glycolysis, Gluconeogenesis, and Pyruvate Metabolism	100000580	HMDB02712	-0.0520734	0.0127923	5e-05	0.056853	0.00014038
met46982	3-(methylthio)acetaminophen sulfate*	Xenobiotics	Drug - Analgesics, Anesthetics	100020827		0.231092	0.0568808	5.18e-05	0.0589038	0.00014508
met52610	1-palmitoyl-2-docosahexaenoyl-GPC (16:0/22:6)	Lipid	Phosphatidylcholine (PC)	100008915	HMDB07991	0.0282679	0.00698689	5.55e-05	0.0632013	0.00015529
met61865	octadecenedioylcarnitine (C18:1-DC)*	Lipid	Fatty Acid Metabolism(Acyl Carnitine)	100005996		-0.0620707	0.0153532	5.63e-05	0.0640728	0.00015704
met52647	X - 24418	Pathway missing	Pathway missing			0.117791	0.0292143	5.88e-05	0.0669278	0.00016342
met52984	3-hydroxybutyrylcarnitine (2)	Lipid	Fatty Acid Metabolism(Acyl Carnitine)	100009271	HMDB13127	0.0572226	0.0141921	5.89e-05	0.0670013	0.00016342
met18335	quinate	Xenobiotics	Food Component/Plant	100000442	HMDB03072	0.214851	0.0535073	6.31e-05	0.0717994	0.00017469
met1126	alanine	Amino Acid	Alanine and Aspartate Metabolism	811	HMDB00161	-0.0199581	0.00498187	6.57e-05	0.074819	0.0001816
met22163	EDTA	Xenobiotics	Chemical	100001002	HMDB15109	-0.0227997	0.00570638	6.72e-05	0.0765168	0.00018527
met52977	glycocholate glucuronide (1)	Lipid	Primary Bile Acid Metabolism	100009259		0.174575	0.0439329	7.51e-05	0.085453	0.00020641
met46672	X - 17325	Pathway missing	Pathway missing			0.156946	0.0395187	7.59e-05	0.0864093	0.00020822
met36845	o-cresol sulfate	Xenobiotics	Benzoate Metabolism	100001806		-0.456193	0.115129	7.87e-05	0.0896168	0.00021542
met2734	gamma-glutamyltyrosine	Peptide	Gamma-glutamyl Amino Acid	1102	HMDB11741	-0.0319716	0.0080817	8.11e-05	0.0922418	0.00022067
met46173	aconitate [cis or trans]	Energy	TCA Cycle	100001359		0.020596	0.005207	8.1e-05	0.0921212	0.00022067
met12017	3-methoxytyrosine	Amino Acid	Tyrosine Metabolism	1342	HMDB01434	0.0347412	0.00878047	8.22e-05	0.0935966	0.00022291
met49542	X - 23665	Pathway missing	Pathway missing			-0.107208	0.0271312	8.23e-05	0.0936209	0.00022291
met32980	adrenate (22:4n6)	Lipid	Polyunsaturated Fatty Acid (n3 and n6)	100001193	HMDB02226	0.0607681	0.0154234	8.62e-05	0.0980669	0.00023294
met39598	7-methylurate	Xenobiotics	Xanthine Metabolism	100002241	HMDB11107	0.370278	0.0941737	8.93e-05	0.101621	0.00024081
met1572	glycerate	Carbohydrate	Glycolysis, Gluconeogenesis, and Pyruvate Metabolism	1052	HMDB00139	0.0303442	0.00775218	9.6e-05	0.109274	0.00025772
met47739	5-hydroxymethyl-2-furoylcarnitine*	Xenobiotics	Food Component/Plant	100021012		-0.133891	0.0341913	9.59e-05	0.10919	0.00025772
met32457	3-hydroxylaurate	Lipid	Fatty Acid, Monohydroxy	100001112	HMDB00387	0.0541461	0.013839	9.65e-05	0.109784	0.00025832
met47301	X - 18887	Pathway missing	Pathway missing			0.109096	0.0278867	9.69e-05	0.110245	0.00025879
met52468	1-stearoyl-2-linoleoyl-GPI (18:0/18:2)	Lipid	Phosphatidylinositol (PI)	100008994	HMDB09809	0.0366649	0.00938095	9.83e-05	0.111831	0.0002619
met52640	X - 24411	Pathway missing	Pathway missing			-0.126096	0.0323266	0.0001014	0.115396	0.0002694
met57331	behenoyl dihydrosphingomyelin (d18:0/22:0)*	Lipid	Sphingolipid Metabolism	100009026	HMDB12091	0.0419385	0.0107526	0.00010156	0.115571	0.0002694
met47800	X - 15666	Pathway missing	Pathway missing			-0.0342183	0.00878131	0.00010336	0.117626	0.00027355
met1494	5-oxoproline	Amino Acid	Glutathione Metabolism	1021	HMDB00267	-0.0181877	0.00468268	0.00010839	0.12335	0.00028619
met47136	N-acetyl-S-allyl-L-cysteine	Xenobiotics	Food Component/Plant	100005818		-0.356708	0.0919325	0.00010913	0.124193	0.00028748
met45721	3-(N-acetyl-L-cystein-S-yl) acetaminophen	Xenobiotics	Drug - Analgesics, Anesthetics	2048		0.368671	0.0950552	0.00011107	0.126403	0.00029192
met52790	X - 24473	Pathway missing	Pathway missing			0.119997	0.0309551	0.0001124	0.127909	0.00029472
met53172	X - 24736	Pathway missing	Pathway missing			0.142717	0.0368826	0.00011515	0.131038	0.00030124
met44876	gamma-CEHC	Cofactors and Vitamins	Tocopherol Metabolism	100002094	HMDB01931	0.0604306	0.0156524	0.00011925	0.13571	0.00031126
met33161	2-methoxyacetaminophen glucuronide*	Xenobiotics	Drug - Analgesics, Anesthetics	100001795		0.345209	0.0896227	0.00012374	0.14082	0.00032224
met33935	piperine	Xenobiotics	Food Component/Plant	100001267	HMDB29377	-0.133027	0.0347172	0.00013411	0.15262	0.00034845
met527	lactate	Carbohydrate	Glycolysis, Gluconeogenesis, and Pyruvate Metabolism	482	HMDB00190	-0.0278625	0.00730254	0.00014315	0.16291	0.00037109
met52438	1-stearoyl-2-oleoyl-GPC (18:0/18:1)	Lipid	Phosphatidylcholine (PC)	100008904	HMDB08038	0.0267608	0.00703343	0.00014937	0.169988	0.00038634
met37459	ergothioneine	Xenobiotics	Food Component/Plant	100002154	HMDB03045	-0.0600531	0.0157879	0.00014982	0.170499	0.00038662
met32377	N-acetylneuraminate	Carbohydrate	Aminosugar Metabolism	1162	HMDB00230	0.0274716	0.00725833	0.00016151	0.183798	0.00041583
met48580	2-acetamidophenol sulfate	Xenobiotics	Drug - Analgesics, Anesthetics	100006190		-0.431792	0.114556	0.0001721	0.195854	0.00044211
met46459	glucuronide of piperine metabolite C17H21NO3 (4)*	Xenobiotics	Food Component/Plant	100020492		-0.151093	0.0400948	0.0001727	0.196531	0.00044264
met46516	X - 21471	Pathway missing	Pathway missing			-0.0812819	0.0216284	0.00018001	0.204847	0.00046033
met34396	choline phosphate	Lipid	Phospholipid Metabolism	267	HMDB01565	0.0445254	0.0118519	0.00018108	0.206075	0.00046205
met396	glutarate (C5-DC)	Lipid	Fatty Acid, Dicarboxylate	339	HMDB00661	-0.092513	0.0246356	0.00018175	0.206835	0.00046272
met48992	cis-4-decenoate (10:1n6)*	Lipid	Medium Chain Fatty Acid	100002796		0.0634924	0.0169398	0.00018702	0.212831	0.00047507
met32306	trans-4-hydroxyproline	Amino Acid	Urea cycle; Arginine and Proline Metabolism	1001	HMDB00725	-0.0331846	0.00887446	0.00019374	0.220481	0.00049105
met18477	glycodeoxycholate	Lipid	Secondary Bile Acid Metabolism	100000436	HMDB00631	0.169421	0.0453388	0.00019548	0.222454	0.00049325
met57687	N-trimethyl 5-aminovalerate	Amino Acid	Lysine Metabolism	100015962		0.0412058	0.0110258	0.00019506	0.221973	0.00049325
met47031	2-methoxyacetaminophen sulfate*	Xenobiotics	Drug - Analgesics, Anesthetics	100001793		0.346033	0.0927365	0.00019979	0.227358	0.00050301
met1418	5,6-dihydrothymine	Nucleotide	Pyrimidine Metabolism, Thymine containing	158	HMDB00079	-0.0259646	0.00697002	0.00020484	0.23311	0.00051459
met47642	X - 12101	Pathway missing	Pathway missing			0.0614252	0.0165119	0.00020867	0.237464	0.00052305
met54968	linoleoyl-linoleoyl-glycerol (18:2/18:2) [1]*	Lipid	Diacylglycerol	100010941	HMDB07248	-0.0652502	0.0176125	0.00022147	0.252035	0.00055392
met32198	acetylcarnitine (C2)	Lipid	Fatty Acid Metabolism(Acyl Carnitine)	100000802	HMDB00201	0.0267924	0.007233	0.00022207	0.25272	0.00055421
met12032	4-acetamidophenol	Xenobiotics	Drug - Analgesics, Anesthetics	1383	HMDB01859	0.355144	0.0959408	0.00022432	0.25528	0.0005586
met38637	cinnamoylglycine	Xenobiotics	Food Component/Plant	100002253	HMDB11621	0.251055	0.0678812	0.00022749	0.258884	0.00056525
met57664	N-oleoylserine	Lipid	Endocannabinoid	100015641		0.0696092	0.0188684	0.00023564	0.268162	0.00058423
met32328	hexanoylcarnitine (C6)	Lipid	Fatty Acid Metabolism(Acyl Carnitine)	100000781	HMDB00705	0.0458258	0.0124763	0.00025087	0.285492	0.00062063
met54704	3-amino-2-piperidone	Amino Acid	Urea cycle; Arginine and Proline Metabolism	100020361	HMDB00323	-0.0237708	0.0065103	0.00027266	0.310288	0.00067308
met601	dihydroorotate	Nucleotide	Pyrimidine Metabolism, Orotate containing	923	HMDB03349	-0.0459705	0.0127268	0.0003163	0.359954	0.00077912
met57519	eicosenoylcarnitine (C20:1)*	Lipid	Fatty Acid Metabolism(Acyl Carnitine)	100015838		-0.03405	0.00944792	0.00032691	0.372026	0.00080351
met47783	X - 22519	Pathway missing	Pathway missing			-0.0984945	0.0276896	0.00039003	0.443858	0.00095659
met1566	3-aminoisobutyrate	Nucleotide	Pyrimidine Metabolism, Thymine containing	1114	HMDB03911	-0.0423951	0.0119477	0.00040287	0.458468	0.0009858
met36776	7-alpha-hydroxy-3-oxo-4-cholestenoate (7-Hoca)	Lipid	Sterol	100001609	HMDB12458	-0.026304	0.00741316	0.00040368	0.459382	0.0009858
met32445	3-methylxanthine	Xenobiotics	Xanthine Metabolism	100001108	HMDB01886	0.183334	0.0517736	0.00041449	0.471695	0.00101005
met46689	branched chain 14:0 dicarboxylic acid**	Lipid	Fatty Acid, Dicarboxylate	100021374		-0.0992166	0.0280813	0.00042742	0.486404	0.00103932
met37063	gamma-glutamylalanine	Peptide	Gamma-glutamyl Amino Acid	100001843	HMDB29142	-0.0506607	0.0143561	0.00043339	0.4932	0.0010516
met57636	carotene diol (2)	Cofactors and Vitamins	Vitamin A Metabolism	100015967		0.0467303	0.0132501	0.00043881	0.499367	0.00106248
met46165	3-methyl catechol sulfate (1)	Xenobiotics	Benzoate Metabolism	100004112		-0.152927	0.0438585	0.00050743	0.577451	0.00122601
met36850	taurolithocholate 3-sulfate	Lipid	Secondary Bile Acid Metabolism	100001658	HMDB02580	0.0953832	0.0274827	0.00053863	0.612965	0.00129865
met15336	tartarate	Xenobiotics	Food Component/Plant	100000295	HMDB00956	0.289673	0.083471	0.00054009	0.614618	0.0012994
met43582	5-(galactosylhydroxy)-L-lysine	Amino Acid	Lysine Metabolism	100002462		0.0313651	0.0090848	0.00057592	0.655395	0.00138269
met35157	N6-carbamoylthreonyladenosine	Nucleotide	Purine Metabolism, Adenine containing	100001415	HMDB41623	-0.0254005	0.00736392	0.00058281	0.663238	0.00139629
met52025	X - 23997	Pathway missing	Pathway missing			0.0914375	0.0266073	0.00061118	0.695521	0.00146118
met39732	N-oleoyltaurine	Lipid	Endocannabinoid	100003119		0.0986207	0.0288257	0.00064533	0.734388	0.0015396
met1638	arginine	Amino Acid	Urea cycle; Arginine and Proline Metabolism	231	HMDB00517	-0.0180698	0.00529066	0.00065873	0.749638	0.00156828
met36103	p-cresol sulfate	Xenobiotics	Benzoate Metabolism	100001315	HMDB11635	0.0683022	0.0200558	0.00068287	0.777107	0.00162235
met53176	1-linoleoyl-2-linolenoyl-GPC (18:2/18:3)*	Lipid	Phosphatidylcholine (PC)	100009343	HMDB08141	0.0755163	0.022214	0.0006981	0.794436	0.00165507
met52710	1-linoleoyl-2-arachidonoyl-GPC (18:2/20:4n6)*	Lipid	Phosphatidylcholine (PC)	100009131	HMDB08147	0.0218972	0.00644868	0.00070722	0.804815	0.00167321
met35126	phenylacetylglutamine	Peptide	Acetylated Peptides	100001417	HMDB06344	0.0518761	0.0153024	0.00072262	0.822338	0.0017061
met36602	1-oleoyl-GPI (18:1)*	Lipid	Lysophospholipid	100001777		0.0642256	0.0189879	0.00074248	0.844944	0.00174937
met1584	methyl indole-3-acetate	Xenobiotics	Food Component/Plant	1104	HMDB29738	-0.309965	0.0920114	0.00078067	0.888404	0.00183555
met57370	lactosyl-N-nervonoyl-sphingosine (d18:1/24:1)*	Lipid	Ceramides	100015620		0.0288436	0.00864325	0.00087316	0.99366	0.00204878
met52871	X - 24550	Pathway missing	Pathway missing			0.129408	0.0389348	0.00091608	1	0.00214507
met37475	4-acetaminophen sulfate	Xenobiotics	Drug - Analgesics, Anesthetics	2049	HMDB59911	0.429892	0.129379	0.00091947	1	0.00214857
met18368	cys-gly, oxidized	Amino Acid	Glutathione Metabolism	1224		-0.0652399	0.0196873	0.00094881	1	0.0022126
met47977	X - 13844	Pathway missing	Pathway missing			0.139555	0.042237	0.00098154	1	0.00228424
met35637	cysteinylglycine	Amino Acid	Glutathione Metabolism	278	HMDB00078	-0.0575	0.0174118	0.00099203	1	0.00230394
met1444	pipecolate	Amino Acid	Lysine Metabolism	1025	HMDB00070	-0.0475506	0.014429	0.00101465	1	0.00235168
met52431	1-palmitoleoylglycerol (16:1)*	Lipid	Monoacylglycerol	100008952	HMDB11565	0.0996015	0.0302514	0.00102326	1	0.00236681
met46645	X - 13728	Pathway missing	Pathway missing			0.113996	0.0349147	0.00112727	1	0.0026021
met38395	12,13-DiHOME	Lipid	Fatty Acid, Dihydroxy	62	HMDB04705	0.0962222	0.0294795	0.00113116	1	0.00260578
met52881	X - 24560	Pathway missing	Pathway missing			0.126733	0.0388917	0.00115199	1	0.0026484
met15500	carnitine	Lipid	Carnitine Metabolism	100000007	HMDB00062	-0.01487	0.00457116	0.00117505	1	0.00269598
met40473	hydantoin-5-propionic acid	Amino Acid	Histidine Metabolism	100002514	HMDB01212	-0.0474572	0.0146848	0.00126595	1	0.00289869
met48152	glucose	Carbohydrate	Glycolysis, Gluconeogenesis, and Pyruvate Metabolism	572	HMDB00122	-0.0106197	0.00329944	0.00132314	1	0.00302357
met1358	stearate (18:0)	Lipid	Long Chain Fatty Acid	439	HMDB00827	0.0182542	0.00569039	0.00137444	1	0.00313448
met46728	glucuronide of piperine metabolite C17H21NO3 (3)*	Xenobiotics	Food Component/Plant	100020491		-0.117789	0.037022	0.00150331	1	0.00342153
met46519	glucuronide of piperine metabolite C17H21NO3 (5)*	Xenobiotics	Food Component/Plant	100020493		-0.122257	0.0386048	0.00158139	1	0.00358491
met57547	2,3-dihydroxy-2-methylbutyrate	Amino Acid	Leucine, Isoleucine and Valine Metabolism	100010869	HMDB29576	-0.107521	0.0339503	0.00158065	1	0.00358491
met38125	4-cholesten-3-one	Lipid	Sterol	100002227	HMDB00921	0.0865591	0.027405	0.00162633	1	0.003676
met46486	X - 21441	Pathway missing	Pathway missing			-0.0904676	0.0286474	0.00162804	1	0.003676
met43761	2-aminoheptanoate	Lipid	Fatty Acid, Amino	100004542		-0.0390513	0.0124119	0.00169759	1	0.00382546
met46388	dodecadienoate (12:2)*	Lipid	Fatty Acid, Dicarboxylate	100020478		0.0355135	0.0113229	0.00175206	1	0.00394039
met46666	X - 15728	Pathway missing	Pathway missing			-0.153843	0.0492944	0.00184756	1	0.00414698
met46633	X - 12844	Pathway missing	Pathway missing			0.0341219	0.0109523	0.00188194	1	0.00421585
met40481	dihydroferulic acid	Xenobiotics	Food Component/Plant	100003432		-0.344285	0.110791	0.00193438	1	0.00432479
met33173	2-hydroxyacetaminophen sulfate*	Xenobiotics	Drug - Analgesics, Anesthetics	100001791		0.371048	0.119508	0.00195132	1	0.00435412
met57554	2'-O-methylcytidine	Nucleotide	Pyrimidine Metabolism, Cytidine containing	100010895		-0.0181121	0.00584302	0.00198383	1	0.00441801
met47687	X - 12100	Pathway missing	Pathway missing			0.0178262	0.0057601	0.00201754	1	0.00447824
met53242	5-bromotryptophan	Amino Acid	Tryptophan Metabolism	100009338		-0.0269882	0.00872063	0.00201875	1	0.00447824
met46144	methyl glucopyranoside (alpha + beta)	Xenobiotics	Food Component/Plant	100005864		0.207982	0.0672903	0.0020452	1	0.00452809
met54809	4-aminophenol sulfate (2)	Xenobiotics	Drug - Analgesics, Anesthetics	100010871		0.136715	0.0443701	0.00210832	1	0.00465878
met20693	tartronate (hydroxymalonate)	Xenobiotics	Bacterial/Fungal	100000840	HMDB35227	0.0510507	0.0166476	0.00221964	1	0.00489525
met46632	X - 14056	Pathway missing	Pathway missing			-0.031923	0.0104142	0.00222585	1	0.00489946
met15736	4-acetamidophenylglucuronide	Xenobiotics	Drug - Analgesics, Anesthetics	100000043	HMDB10316	0.369416	0.120604	0.00224191	1	0.00492527
met45951	1-linolenoyl-GPC (18:3)*	Lipid	Lysophospholipid	100005350	HMDB10388	0.0395118	0.0129244	0.00228474	1	0.0050097
met47000	glutamine conjugate of C7H12O2*	Partially Characterized Molecules	Partially Characterized Molecules	100020259		0.109401	0.0358412	0.0023218	1	0.00508117
met49617	1-lignoceroyl-GPC (24:0)	Lipid	Lysophospholipid	100002873	HMDB10405	0.0277282	0.00908865	0.00233261	1	0.00509503
met42448	1-stearoyl-2-oleoyl-GPE (18:0/18:1)	Lipid	Phosphatidylethanolamine (PE)	100001856	HMDB08993	0.039346	0.012924	0.00238312	1	0.00519539
met48153	mannose	Carbohydrate	Fructose, Mannose and Galactose Metabolism	803	HMDB00169	-0.0175031	0.00575198	0.00239506	1	0.00521143
met48674	umbelliferone sulfate	Xenobiotics	Food Component/Plant	100006282		-0.357904	0.117711	0.00241536	1	0.00524556
met48434	N-acetylcitrulline	Amino Acid	Urea cycle; Arginine and Proline Metabolism	100001577	HMDB00856	-0.110508	0.0363849	0.00243988	1	0.00528873
met46607	X - 11849	Pathway missing	Pathway missing			0.157775	0.0519699	0.00245147	1	0.00530374
met62060	hydroxyasparagine**	Amino Acid	Alanine and Aspartate Metabolism	100020205		0.016047	0.00528829	0.0024658	1	0.00532463
met52772	X - 24455	Pathway missing	Pathway missing			-0.0591778	0.0195724	0.00255648	1	0.00550999
met52475	1-(1-enyl-stearoyl)-2-arachidonoyl-GPE (P-18:0/20:4)*	Lipid	Plasmalogen	100008999	HMDB05779	0.0274202	0.00926586	0.00314665	1	0.00676917
met54837	N2-acetyl,N6,N6-dimethyllysine	Amino Acid	Lysine Metabolism	100020545		0.112508	0.0380568	0.0031752	1	0.00681769
met52879	X - 24558	Pathway missing	Pathway missing			0.11577	0.0394346	0.00339249	1	0.00727054
met33936	octanoylcarnitine (C8)	Lipid	Fatty Acid Metabolism(Acyl Carnitine)	100001247	HMDB00791	0.0433381	0.0147962	0.00346841	1	0.00741926
met27731	ribonate	Carbohydrate	Pentose Metabolism	100001007	HMDB00867	0.0230253	0.00786846	0.00349874	1	0.0074701
met48408	tyramine O-sulfate	Amino Acid	Tyrosine Metabolism	100006092	HMDB06409	-0.0995582	0.0340555	0.00352997	1	0.00752268
met52669	1-palmitoyl-2-oleoyl-GPI (16:0/18:1)*	Lipid	Phosphatidylinositol (PI)	100009066	HMDB09783	0.0437513	0.0150507	0.00372104	1	0.00791502
met52682	1-(1-enyl-palmitoyl)-2-linoleoyl-GPC (P-16:0/18:2)*	Lipid	Plasmalogen	100009009	HMDB11211	0.0218381	0.00752362	0.00376982	1	0.00800384
met57635	carotene diol (1)	Cofactors and Vitamins	Vitamin A Metabolism	100015966		0.0357629	0.0123338	0.00380847	1	0.00807083
met52748	1-(1-enyl-stearoyl)-2-linoleoyl-GPE (P-18:0/18:2)*	Lipid	Plasmalogen	100009225	HMDB11376	0.0250092	0.00871766	0.00419599	1	0.00885907
met52873	X - 24552	Pathway missing	Pathway missing			0.0876063	0.0305347	0.00419164	1	0.00885907
met1505	orotate	Nucleotide	Pyrimidine Metabolism, Orotate containing	445	HMDB00226	-0.0275992	0.00964358	0.00430932	1	0.00907187
met61843	3-hydroxyoleate*	Lipid	Fatty Acid, Monohydroxy	100019966		0.0458629	0.0160379	0.00431272	1	0.00907187
met46295	X - 21286	Pathway missing	Pathway missing			0.0447451	0.0156745	0.00438623	1	0.00920946
met57407	myristoyl-linoleoyl-glycerol (14:0/18:2) [1]*	Lipid	Diacylglycerol	100015683		-0.121263	0.0425662	0.0044641	1	0.00933983
met61862	hexadecenedioate (C16:1-DC)*	Lipid	Fatty Acid, Dicarboxylate	100019975		-0.0481786	0.0169094	0.00446474	1	0.00933983
met47654	X - 11858	Pathway missing	Pathway missing			0.167286	0.0588223	0.00453998	1	0.00947982
met46960	sulfate*	Xenobiotics	Chemical	100002528	HMDB01448	0.0132039	0.004672	0.00479282	1	0.00998942
met38768	15-methylpalmitate (i17:0)	Lipid	Fatty Acid, Branched	100002945		0.0663186	0.023576	0.00499622	1	0.0103943
met17769	sphinganine	Lipid	Sphingolipid Metabolism	313	HMDB00269	0.0669858	0.0238758	0.00510675	1	0.0106049
met46905	X - 21736	Pathway missing	Pathway missing			0.0484555	0.0172883	0.00515333	1	0.0106821
met46701	X - 19141	Pathway missing	Pathway missing			-0.0438772	0.0156667	0.00518221	1	0.0107225
met52477	1-(1-enyl-palmitoyl)-2-oleoyl-GPE (P-16:0/18:1)*	Lipid	Plasmalogen	100009005	HMDB11342	0.0298698	0.0106923	0.00528507	1	0.0109155
met33941	decanoylcarnitine (C10)	Lipid	Fatty Acid Metabolism(Acyl Carnitine)	100001251	HMDB00651	0.0419366	0.0151094	0.00560149	1	0.011548
met31932	propionylglycine	Lipid	Fatty Acid Metabolism (also BCAA Metabolism)	100001150	HMDB00783	0.0684627	0.0246846	0.005635	1	0.0115961
met52533	X - 24337	Pathway missing	Pathway missing			-0.0564394	0.0203854	0.00571989	1	0.0117495
met62103	cysteinylglycine disulfide*	Amino Acid	Glutathione Metabolism	100002466	HMDB00709	-0.0180352	0.00656628	0.00610371	1	0.0125154
met47114	ferulic acid 4-sulfate	Xenobiotics	Food Component/Plant	100005389	HMDB29200	-0.253199	0.0921807	0.00611698	1	0.01252
met47393	dihydrocaffeate sulfate (2)	Xenobiotics	Food Component/Plant	100020822		-0.101101	0.036942	0.00630414	1	0.0128799
met53266	X - 24747	Pathway missing	Pathway missing			-0.125201	0.0464088	0.00708087	1	0.0144409
met46709	X - 17654	Pathway missing	Pathway missing			-0.0775319	0.0288111	0.00722423	1	0.0147069
met18392	theobromine	Xenobiotics	Xanthine Metabolism	100000445	HMDB02825	0.0911484	0.0340627	0.00756082	1	0.0153647
met35628	1-oleoyl-GPE (18:1)	Lipid	Lysophospholipid	100001569	HMDB11506	-0.025934	0.00971521	0.00770508	1	0.0156025
met61873	methylnaphthyl sulfate (2)*	Xenobiotics	Chemical	100020006		-0.18995	0.0711586	0.0077053	1	0.0156025
met32489	caproate (6:0)	Lipid	Medium Chain Fatty Acid	926	HMDB00535	0.0277928	0.0104218	0.0077658	1	0.0156971
met61887	glucuronide of C10H18O2 (7)*	Partially Characterized Molecules	Partially Characterized Molecules	100020014		-0.107894	0.0404761	0.00779535	1	0.0157289
met1284	threonine	Amino Acid	Glycine, Serine and Threonine Metabolism	564	HMDB00167	-0.0145413	0.00548985	0.0081872	1	0.0164903
met46639	X - 12851	Pathway missing	Pathway missing			0.12527	0.0473211	0.00822376	1	0.0165347
met48009	X - 17357	Pathway missing	Pathway missing			-0.0362553	0.0137537	0.00850259	1	0.0170652
met42381	gamma-CEHC glucuronide*	Cofactors and Vitamins	Tocopherol Metabolism	100004243		0.0799894	0.0303646	0.00854191	1	0.0171139
met32415	docosadienoate (22:2n6)	Lipid	Polyunsaturated Fatty Acid (n3 and n6)	100001182	HMDB61714	0.0271686	0.0104285	0.0093005	1	0.018601
met47439	X - 13507	Pathway missing	Pathway missing			-0.0917401	0.0353694	0.00961352	1	0.0191933
met48569	acesulfame	Xenobiotics	Food Component/Plant	100006203	HMDB33585	0.299156	0.115581	0.00976752	1	0.0194666
met35159	cysteine-glutathione disulfide	Amino Acid	Glutathione Metabolism	100001437	HMDB00656	0.0554077	0.0214205	0.00981027	1	0.0195176
met32390	N-acetyltyrosine	Amino Acid	Tyrosine Metabolism	100001104	HMDB00866	-0.0589493	0.0228547	0.0100178	1	0.0198957
met54841	X - 24813	Pathway missing	Pathway missing			0.0151045	0.00585611	0.0100402	1	0.0199055
met37198	5alpha-pregnan-3beta,20alpha-diol disulfate	Lipid	Progestin Steroids	100001988		-0.0696737	0.0272036	0.0105573	1	0.0208942
met1564	citrate	Energy	TCA Cycle	1124	HMDB00094	0.00884688	0.00347497	0.0110274	1	0.0217868
met48990	pyruvate	Carbohydrate	Glycolysis, Gluconeogenesis, and Pyruvate Metabolism	823	HMDB00243	-0.0150221	0.00590183	0.0110465	1	0.0217868
met41726	oxypurinol	Xenobiotics	Drug - Metabolic	100002489	HMDB00786	-0.0649978	0.0255666	0.011117	1	0.0218877
met47016	X - 21839	Pathway missing	Pathway missing			-0.122642	0.0482404	0.0111402	1	0.0218955
met43333	carboxyibuprofen	Xenobiotics	Drug - Analgesics, Anesthetics	100004171	HMDB60564	0.248913	0.0982331	0.0114147	1	0.0223963
met57691	trazadone	Xenobiotics	Drug - Psychoactive	100015783	HMDB14794	0.107379	0.0425465	0.0117434	1	0.0230018
met27447	1-linoleoylglycerol (18:2)	Lipid	Monoacylglycerol	100001040		0.0353096	0.0140197	0.0119133	1	0.0232544
met48885	arabitol/xylitol	Carbohydrate	Pentose Metabolism	100006430		-0.0166388	0.00660469	0.0118952	1	0.0232544
met33228	1-arachidonoyl-GPC (20:4n6)*	Lipid	Lysophospholipid	100001551	HMDB10395	0.0221379	0.00881009	0.0121085	1	0.0235951
met32492	caprylate (8:0)	Lipid	Medium Chain Fatty Acid	932	HMDB00482	0.0545891	0.0218577	0.0126441	1	0.0245965
met47985	X - 15523	Pathway missing	Pathway missing			0.076599	0.0307183	0.012782	1	0.0248223
met61858	ribulonate/xylulonate*	Carbohydrate	Pentose Metabolism	100019968		0.0297413	0.0120004	0.0133498	1	0.0258809
met1558	4-acetamidobutanoate	Amino Acid	Polyamine Metabolism	1113	HMDB03681	0.0281494	0.0113702	0.0134361	1	0.0259686
met52773	X - 24456	Pathway missing	Pathway missing			-0.0774831	0.0312982	0.0134407	1	0.0259686
met57807	meclizine	Xenobiotics	Drug - Other	100015778	HMDB14875	0.080349	0.0325029	0.0135565	1	0.026148
met54955	linoleoyl-arachidonoyl-glycerol (18:2/20:4) [1]*	Lipid	Diacylglycerol	100010922	HMDB07257	-0.0743628	0.0301503	0.0137891	1	0.0265517
met52616	1-palmitoyl-2-stearoyl-GPC (16:0/18:0)	Lipid	Phosphatidylcholine (PC)	100008921	HMDB07970	-0.0187495	0.00763492	0.0142217	1	0.0273383
met49463	X - 23587	Pathway missing	Pathway missing			-0.0676833	0.0275884	0.0143034	1	0.027449
met53	glutamine	Amino Acid	Glutamate Metabolism	563	HMDB00641	-0.0072298	0.00295299	0.0144987	1	0.0277769
met46623	X - 12729	Pathway missing	Pathway missing			0.0768678	0.0314045	0.0145282	1	0.0277867
met61848	THC carboxylic acid glucuronide	Xenobiotics	Drug - Psychoactive	100016049		-0.0811355	0.0332565	0.0148725	1	0.0283976
met15990	glycerophosphorylcholine (GPC)	Lipid	Phospholipid Metabolism	100000269	HMDB00086	0.0206056	0.00847734	0.0152245	1	0.0290208
met46331	desmethylnaproxen	Xenobiotics	Drug - Analgesics, Anesthetics	100001787	HMDB13989	0.150308	0.0619004	0.0152978	1	0.0291119
met61769	5-dodecenoylcarnitine (C12:1)	Lipid	Fatty Acid Metabolism(Acyl Carnitine)	100016069		0.0281943	0.011632	0.0155089	1	0.0294643
met38321	allopurinol riboside	Xenobiotics	Drug - Metabolic	100002454		-0.0470697	0.0194946	0.0158773	1	0.030114
met46683	X - 16944	Pathway missing	Pathway missing			0.0370356	0.0154402	0.0166168	1	0.031464
met49536	X - 23659	Pathway missing	Pathway missing			-0.0612639	0.0255726	0.0167449	1	0.0316539
met39609	16-hydroxypalmitate	Lipid	Fatty Acid, Monohydroxy	100002953	HMDB06294	0.0223934	0.00936197	0.0169178	1	0.0318919
met52502	X - 24307	Pathway missing	Pathway missing			-0.0260126	0.0108787	0.0169268	1	0.0318919
met61836	THC carboxylic acid	Xenobiotics	Drug - Psychoactive	100016048		-0.0781442	0.0327186	0.0171039	1	0.0321722
met605	uracil	Nucleotide	Pyrimidine Metabolism, Uracil containing	825	HMDB00300	-0.041064	0.0172424	0.0174195	1	0.0327118
met54873	2-naphthol sulfate	Xenobiotics	Chemical	100020515		-0.0850514	0.0357349	0.0174671	1	0.0327473
met62066	glyco-beta-muricholate**	Lipid	Primary Bile Acid Metabolism	100020214		0.0897648	0.037779	0.0176609	1	0.0330561
met53013	glycosyl-N-palmitoyl-sphingosine (d18:1/16:0)	Lipid	Ceramides	100009272		0.0172111	0.00725446	0.0178393	1	0.0333352
met47773	X - 22509	Pathway missing	Pathway missing			0.109491	0.0463428	0.018314	1	0.0341661
met52525	3-(3-amino-3-carboxypropyl)uridine*	Nucleotide	Pyrimidine Metabolism, Uracil containing	100001426		-0.0453429	0.019285	0.0188797	1	0.0351638
met52634	palmitoyl-linoleoyl-glycerol (16:0/18:2) [2]*	Lipid	Diacylglycerol	100009055	HMDB07103	-0.056834	0.0242393	0.019217	1	0.0357336
met48258	1-oleoyl-GPC (18:1)	Lipid	Lysophospholipid	100001272	HMDB02815	0.0140524	0.00600102	0.0193659	1	0.0359517
met38178	cis-4-decenoylcarnitine (C10:1)	Lipid	Fatty Acid Metabolism(Acyl Carnitine)	100002259		0.0294921	0.0126269	0.0196793	1	0.036474
met46602	X - 11478	Pathway missing	Pathway missing			0.0379159	0.0162683	0.0199496	1	0.0369149
met33441	isobutyrylcarnitine (C4)	Amino Acid	Leucine, Isoleucine and Valine Metabolism	100001055	HMDB00736	-0.0314172	0.0135165	0.0202782	1	0.0374619
met38669	diphenhydramine	Xenobiotics	Drug - Respiratory	100002732	HMDB01927	0.150647	0.0649767	0.0206143	1	0.0380211
met37252	norfluoxetine	Xenobiotics	Drug - Psychoactive	100003769	HMDB60551	0.112471	0.0487674	0.0212665	1	0.0391607
met47824	X - 17346	Pathway missing	Pathway missing			-0.0894859	0.0389348	0.0217297	1	0.0399339
met49557	X - 23680	Pathway missing	Pathway missing			-0.0306591	0.0133432	0.0217566	1	0.0399339
met36808	dimethylarginine (SDMA + ADMA)	Amino Acid	Urea cycle; Arginine and Proline Metabolism	100001810	HMDB01539	-0.0128505	0.00563763	0.0228237	1	0.0418251
met37496	N-acetylputrescine	Amino Acid	Polyamine Metabolism	192	HMDB02064	0.0156185	0.00688638	0.0235111	1	0.0429744
met52974	glycochenodeoxycholate sulfate	Lipid	Primary Bile Acid Metabolism	100006641		-0.0818612	0.0360954	0.0235264	1	0.0429744
met47135	11-ketoetiocholanolone glucuronide	Lipid	Androgenic Steroids	100005402		0.0762126	0.0337095	0.0239549	1	0.0436869
met46646	X - 13835	Pathway missing	Pathway missing			-0.0757213	0.0335869	0.0243498	1	0.0443362
met18494	taurochenodeoxycholate	Lipid	Primary Bile Acid Metabolism	1629	HMDB00951	0.087929	0.039136	0.0248454	1	0.0451662
met42593	triamterene	Xenobiotics	Drug - Cardiovascular	100003968	HMDB01940	0.0555717	0.024982	0.0262829	1	0.0477032
met46106	desmethylnaproxen sulfate	Xenobiotics	Drug - Analgesics, Anesthetics	100001788		0.178331	0.0802162	0.0264078	1	0.0478537
met47988	X - 16087	Pathway missing	Pathway missing			-0.0610566	0.0274808	0.0264982	1	0.047941
met47011	X - 21834	Pathway missing	Pathway missing			-0.0856153	0.0386322	0.0268798	1	0.0485542
met54961	oleoyl-arachidonoyl-glycerol (18:1/20:4) [2]*	Lipid	Diacylglycerol	100010937	HMDB07228	0.0486936	0.0221153	0.0278758	1	0.0502737
met40459	escitalopram	Xenobiotics	Drug - Psychoactive	100003444	HMDB05028	0.124158	0.0567009	0.0287399	1	0.0517499
met48182	myristoleoylcarnitine (C14:1)*	Lipid	Fatty Acid Metabolism(Acyl Carnitine)	100006051		0.029814	0.013628	0.0288928	1	0.0519431
met46598	tridecenedioate (C13:1-DC)*	Lipid	Fatty Acid, Dicarboxylate	100002199		-0.0307404	0.0140581	0.0289657	1	0.0519921
met46636	X - 12849	Pathway missing	Pathway missing			0.0869537	0.0397856	0.0290492	1	0.0520598
met37455	glycerophosphoethanolamine	Lipid	Phospholipid Metabolism	100001620	HMDB00114	0.0423398	0.0193987	0.0292638	1	0.0522797
met47478	X - 10458	Pathway missing	Pathway missing			0.0545981	0.0250082	0.0292183	1	0.0522797
met47959	X - 13553	Pathway missing	Pathway missing			-0.0583043	0.0268215	0.0299149	1	0.0533196
met52988	adipoylcarnitine (C6-DC)	Lipid	Fatty Acid Metabolism(Acyl Carnitine)	100006614	HMDB61677	-0.0387721	0.0178366	0.0299396	1	0.0533196
met52813	X - 24494	Pathway missing	Pathway missing			-0.0672205	0.0310382	0.0305365	1	0.0542978
met598	phytanate	Xenobiotics	Food Component/Plant	466	HMDB00801	-0.0289879	0.0133945	0.0306521	1	0.0544183
met48195	fructose	Carbohydrate	Fructose, Mannose and Galactose Metabolism	878	HMDB00660	0.0218822	0.0101702	0.0316427	1	0.0560895
met33487	glutamate, gamma-methyl ester	Amino Acid	Glutamate Metabolism	100001103	HMDB61715	-0.0460885	0.0215628	0.0327716	1	0.0580001
met44619	fluoxetine	Xenobiotics	Drug - Psychoactive	1382		0.103661	0.0485636	0.033002	1	0.0583173
met47788	X - 13431	Pathway missing	Pathway missing			-0.0619645	0.029044	0.0330983	1	0.0583966
met46111	guaiacol sulfate	Xenobiotics	Benzoate Metabolism	100004208	HMDB60013	-0.0384717	0.0180546	0.0333155	1	0.0586889
met528	alpha-ketoglutarate	Energy	TCA Cycle	93	HMDB00208	0.0201646	0.00947717	0.0335712	1	0.0590479
met35186	1-arachidonoyl-GPE (20:4n6)*	Lipid	Lysophospholipid	100001571	HMDB11517	0.0148098	0.00699747	0.03452	1	0.060623
met32882	hydroxybupropion	Xenobiotics	Drug - Psychoactive	100001309	HMDB12235	0.115231	0.0546674	0.0352507	1	0.061811
met46798	oleoyl-linoleoyl-glycerol (18:1/18:2) [1]	Lipid	Diacylglycerol	100002989	HMDB07219	-0.0266974	0.012742	0.0363638	1	0.0636647
met1437	succinate	Energy	TCA Cycle	252	HMDB00254	0.042035	0.020095	0.0366735	1	0.0641082
met2730	gamma-glutamylglutamine	Peptide	Gamma-glutamyl Amino Acid	1140	HMDB11738	-0.0120166	0.00575699	0.0370791	1	0.0645352
met32401	trigonelline (N'-methylnicotinate)	Cofactors and Vitamins	Nicotinate and Nicotinamide Metabolism	100001092	HMDB00875	0.0545265	0.0261361	0.037171	1	0.0645352
met36751	N2-acetyllysine	Amino Acid	Lysine Metabolism	100001721	HMDB00446	0.0779356	0.0373461	0.0371137	1	0.0645352
met47653	X - 11593	Pathway missing	Pathway missing			0.0168917	0.00809327	0.0370892	1	0.0645352
met55015	gamma-glutamyl-alpha-lysine	Peptide	Gamma-glutamyl Amino Acid	100010901		-0.0110652	0.00530471	0.0372013	1	0.0645352
met34384	stachydrine	Xenobiotics	Food Component/Plant	100001296	HMDB04827	-0.0771412	0.037119	0.0379094	1	0.0656634
met44620	4-acetylphenol sulfate	Xenobiotics	Drug - Other	100000711		-0.244016	0.117561	0.038151	1	0.0658814
met52604	N-palmitoyl-sphinganine (d18:0/16:0)	Lipid	Sphingolipid Metabolism	100009028	HMDB11760	0.02451	0.0118078	0.0381402	1	0.0658814
met22053	3-hydroxydecanoate	Lipid	Fatty Acid, Monohydroxy	100000997	HMDB02203	0.0247505	0.0119717	0.0389147	1	0.0670983
met43470	3-hydroxycotinine glucuronide	Xenobiotics	Tobacco Metabolite	100004494	HMDB01204	-0.104029	0.0503555	0.0390567	1	0.0672413
met48441	4-hydroxychlorothalonil	Xenobiotics	Chemical	100006082		0.025849	0.0126101	0.0406015	1	0.0697953
met37443	cysteine sulfinic acid	Amino Acid	Methionine, Cysteine, SAM and Taurine Metabolism	100002113	HMDB00996	0.0573233	0.0279819	0.0407233	1	0.0698992
met48011	cortolone glucuronide (1)	Lipid	Corticosteroids	100015971		-0.0276202	0.013538	0.0415797	1	0.0712616
met41754	heme	Cofactors and Vitamins	Hemoglobin and Porphyrin Metabolism	100001386	HMDB03178	-0.0668216	0.0328518	0.0421879	1	0.0721905
met52504	X - 24309	Pathway missing	Pathway missing			0.0349918	0.0172103	0.0422486	1	0.0721905
met19263	1-palmitoyl-2-oleoyl-GPE (16:0/18:1)	Lipid	Phosphatidylethanolamine (PE)	1526	HMDB05320	0.0306445	0.0152502	0.0447188	1	0.0762968
met47718	N-acetyl-isoputreanine	Amino Acid	Polyamine Metabolism	100020487		0.0189507	0.00948078	0.0458579	1	0.0781232
met33947	gamma-glutamyltryptophan	Peptide	Gamma-glutamyl Amino Acid	100001295	HMDB29160	-0.0428881	0.0214951	0.0462451	1	0.0786651
met61871	3-carboxy-4-methyl-5-pentyl-2-furanpropionate (3-Cmpfp)**	Lipid	Fatty Acid, Dicarboxylate	100020004		0.0217438	0.0109216	0.0467268	1	0.0793659
met33946	N-acetylhistidine	Amino Acid	Histidine Metabolism	100001293	HMDB32055	-0.0236663	0.0119202	0.0473319	1	0.0802738
met38662	cotinine N-oxide	Xenobiotics	Tobacco Metabolite	100002719	HMDB01411	-0.0962153	0.0485775	0.0478592	1	0.0809269
met43549	N-formylanthranilic acid	Amino Acid	Tryptophan Metabolism	100004561	HMDB04089	-0.0416248	0.0210129	0.0478345	1	0.0809269
met37431	N-methylproline	Amino Acid	Urea cycle; Arginine and Proline Metabolism	100001956		-0.0551053	0.0278962	0.0484668	1	0.0818327
met12122	naproxen	Xenobiotics	Drug - Analgesics, Anesthetics	1384	HMDB01923	0.175789	0.0892354	0.0490913	1	0.0826419
met61861	octadecenedioate (C18:1-DC)*	Lipid	Fatty Acid, Dicarboxylate	100019978		-0.0261062	0.0132515	0.0490687	1	0.0826419
met48997	isoeugenol sulfate	Xenobiotics	Food Component/Plant	100006089		-0.204043	0.103845	0.0496759	1	0.0835025
met42420	erythronate*	Carbohydrate	Aminosugar Metabolism	100001320	HMDB00613	-0.0095489	0.00487353	0.0503177	1	0.0843765
met48693	3-acetylphenol sulfate	Xenobiotics	Chemical	100004326		-0.219741	0.112164	0.0503441	1	0.0843765
met47437	X - 12680	Pathway missing	Pathway missing			-0.0476384	0.024392	0.0510593	1	0.0854493
met33963	acetoacetate	Lipid	Ketone Bodies	1218	HMDB00060	-0.0719191	0.0372281	0.0536191	1	0.0893963
met49529	X - 23652	Pathway missing	Pathway missing			-0.0381082	0.0197287	0.0536501	1	0.0893963
met57430	N-palmitoyl-heptadecasphingosine (d17:1/16:0)*	Lipid	Sphingolipid Metabolism	100015731		0.0388411	0.0201066	0.0536535	1	0.0893963
met37181	4-allylphenol sulfate	Xenobiotics	Food Component/Plant	100001868		-0.0560437	0.0293116	0.0561305	1	0.0933868
met61702	2-hydroxyphytanate*	Lipid	Fatty Acid, Monohydroxy	100004414		0.0240284	0.012595	0.0566727	1	0.0941512
met52614	1-(1-enyl-stearoyl)-2-oleoyl-GPE (P-18:0/18:1)	Lipid	Plasmalogen	100008919	HMDB11375	0.0248443	0.0130907	0.0579816	1	0.0961853
met18497	taurocholate	Lipid	Primary Bile Acid Metabolism	1648	HMDB00036	0.094026	0.0496096	0.0582974	1	0.0965684
met47009	X - 17354	Pathway missing	Pathway missing			0.0844977	0.0446114	0.0584637	1	0.0966868
met49461	N,N-dimethylalanine	Amino Acid	Alanine and Aspartate Metabolism	100020371		0.0385184	0.0203431	0.0585389	1	0.0966868
met43330	2-hydroxyibuprofen	Xenobiotics	Drug - Analgesics, Anesthetics	100004169	HMDB60920	0.162154	0.0856865	0.0586986	1	0.0968068
met53224	pimeloylcarnitine/3-methyladipoylcarnitine (C7-DC)	Lipid	Fatty Acid Metabolism(Acyl Carnitine)	100009407		0.0534392	0.0282533	0.0588176	1	0.0968068
met62067	carboxyibuprofen glucuronide*	Xenobiotics	Drug - Analgesics, Anesthetics	100020212	HMDB60564	0.0863285	0.045646	0.0588667	1	0.0968068
met43264	3-hydroxybutyrylcarnitine (1)	Lipid	Fatty Acid Metabolism(Acyl Carnitine)	100003926	HMDB13127	0.0565161	0.029954	0.0594492	1	0.0976236
met39271	1-(1-enyl-stearoyl)-GPE (P-18:0)*	Lipid	Lysoplasmalogen	100003001		0.0236505	0.0125638	0.0600523	1	0.0983302
met40469	N1-Methyl-2-pyridone-5-carboxamide	Cofactors and Vitamins	Nicotinate and Nicotinamide Metabolism	100001468	HMDB04193	-0.0231641	0.0123031	0.0599804	1	0.0983302
met57577	isoursodeoxycholate	Lipid	Secondary Bile Acid Metabolism	100002488	HMDB00686	0.0596704	0.0317663	0.0605702	1	0.0990357
met47971	X - 13729	Pathway missing	Pathway missing			0.0390646	0.0209062	0.0619329	1	0.101119
met1712	cortisol	Lipid	Corticosteroids	356	HMDB00063	0.0177686	0.00951756	0.0621834	1	0.101382
met39270	1-(1-enyl-palmitoyl)-GPE (P-16:0)*	Lipid	Lysoplasmalogen	100003000		0.0161756	0.0087341	0.0642874	1	0.104663
met52358	N,O-didesmethylvenlafaxine glucuronide	Xenobiotics	Drug - Psychoactive	100006001	HMDB61167	0.043768	0.0237366	0.0654525	1	0.106407
met48715	eugenol sulfate	Xenobiotics	Food Component/Plant	100006171		-0.190226	0.103544	0.0664559	1	0.107884
met46347	X - 11381	Pathway missing	Pathway missing			-0.019294	0.0105157	0.0667865	1	0.108266
met37445	4-hydroxycoumarin	Xenobiotics	Drug - Cardiovascular	100002049		-0.171331	0.0934264	0.0669517	1	0.10838
met46661	X - 15245	Pathway missing	Pathway missing			0.059084	0.0323925	0.0684121	1	0.110587
met59	histidine	Amino Acid	Histidine Metabolism	355	HMDB00177	-0.0064312	0.00355184	0.070446	1	0.113713
met1493	ornithine	Amino Acid	Urea cycle; Arginine and Proline Metabolism	444	HMDB03374	-0.0098348	0.00545273	0.0715448	1	0.115323
met46626	glutamine conjugate of C6H10O2 (1)*	Partially Characterized Molecules	Partially Characterized Molecules	100020261		0.0399587	0.0222847	0.0732169	1	0.117851
met1508	pantothenate	Cofactors and Vitamins	Pantothenate and CoA Metabolism	1024	HMDB00210	0.0243804	0.0136215	0.0737325	1	0.118513
met52474	1-(1-enyl-palmitoyl)-GPC (P-16:0)*	Lipid	Lysoplasmalogen	100002875	HMDB10407	0.0170323	0.00957855	0.0756299	1	0.121392
met53157	X - 24728	Pathway missing	Pathway missing			-0.0235039	0.0133381	0.0783337	1	0.125555
met1356	nonadecanoate (19:0)	Lipid	Long Chain Fatty Acid	892	HMDB00772	0.0116723	0.00663235	0.0786981	1	0.125961
met46259	X - 21258	Pathway missing	Pathway missing			-0.0429881	0.0245681	0.0804277	1	0.128549
met47802	X - 16397	Pathway missing	Pathway missing			0.034682	0.0198368	0.0806766	1	0.128766
met46428	X - 21383	Pathway missing	Pathway missing			0.036154	0.0207122	0.081163	1	0.129361
met57810	nisinate (24:6n3)	Lipid	Polyunsaturated Fatty Acid (n3 and n6)	100015785	HMDB02007	-0.0622944	0.0357278	0.0814981	1	0.129713
met38661	hydroxycotinine	Xenobiotics	Tobacco Metabolite	100002717	HMDB01390	-0.0951382	0.0546461	0.0819472	1	0.130246
met52281	2-hydroxybutyrate/2-hydroxyisobutyrate	Amino Acid	Glutathione Metabolism	100008928		-0.01701	0.00982715	0.0837306	1	0.132709
met5983	corticosterone	Lipid	Corticosteroids	272	HMDB01547	0.0562454	0.0324935	0.0837294	1	0.132709
met52929	3,4-methyleneheptanoylcarnitine	Lipid	Fatty Acid Metabolism(Acyl Carnitine)	100009234		-0.0596803	0.0345657	0.0845065	1	0.133567
met53180	1-palmitoleoyl-2-linolenoyl-GPC (16:1/18:3)*	Lipid	Phosphatidylcholine (PC)	100009345	HMDB08008	0.0796081	0.0461021	0.0844807	1	0.133567
met62062	3-hydroxystachydrine*	Xenobiotics	Food Component/Plant	100020203		-0.173122	0.100373	0.08484	1	0.133908
met48445	2-methoxyresorcinol sulfate	Xenobiotics	Chemical	100006184		0.117223	0.0680469	0.0852487	1	0.134367
met33934	gamma-glutamyl-epsilon-lysine	Peptide	Gamma-glutamyl Amino Acid	100001262	HMDB03869	-0.0166251	0.00969561	0.0866801	1	0.136246
met53254	caffeic acid sulfate	Xenobiotics	Xanthine Metabolism	100009337	HMDB41708	-0.205376	0.11975	0.0866067	1	0.136246
met606	uridine	Nucleotide	Pyrimidine Metabolism, Uracil containing	535	HMDB00296	-0.009214	0.00542138	0.089499	1	0.140483
met55	beta-alanine	Nucleotide	Pyrimidine Metabolism, Uracil containing	244	HMDB00056	-0.0104186	0.00616778	0.091451	1	0.143349
met48763	3-methoxycatechol sulfate (1)	Xenobiotics	Benzoate Metabolism	100006375		-0.160117	0.0950152	0.0922316	1	0.144158
met49550	doxylamine	Xenobiotics	Drug - Respiratory	100003965	HMDB01936	0.0235735	0.0139867	0.0921684	1	0.144158
met607	trans-urocanate	Amino Acid	Histidine Metabolism	537	HMDB00301	0.0245963	0.0146008	0.0923476	1	0.144158
met47006	X - 21829	Pathway missing	Pathway missing			-0.0308679	0.0183523	0.0928547	1	0.144752
met3127	hypoxanthine	Nucleotide	Purine Metabolism, (Hypo)Xanthine/Inosine containing	171	HMDB00157	-0.0221482	0.0131931	0.093468	1	0.145508
met1567	vanillylmandelate (VMA)	Amino Acid	Tyrosine Metabolism	1111	HMDB00291	0.0143986	0.00861149	0.0947952	1	0.147373
met42370	S-1-pyrroline-5-carboxylate	Amino Acid	Glutamate Metabolism	35	HMDB01301	-0.0135156	0.00808847	0.0950024	1	0.147493
met39757	sertraline	Xenobiotics	Drug - Psychoactive	100002804	HMDB05010	0.0841966	0.0504355	0.0953111	1	0.14769
met49679	X - 23780	Pathway missing	Pathway missing			-0.0547645	0.0328122	0.0953888	1	0.14769
met35137	N2,N2-dimethylguanosine	Nucleotide	Purine Metabolism, Guanine containing	100001412	HMDB04824	-0.0096717	0.00581846	0.0967367	1	0.149574
met48892	2-hydroxysebacate	Lipid	Fatty Acid, Dicarboxylate	100020378	HMDB00424	-0.0392685	0.0237194	0.0980832	1	0.15145
met43591	N2,N5-diacetylornithine	Amino Acid	Urea cycle; Arginine and Proline Metabolism	100004575		-0.0320006	0.0194171	0.0996146	1	0.153606
met38100	betonicine	Xenobiotics	Food Component/Plant	100002153	HMDB29412	0.180015	0.109396	0.100149	1	0.154222
met37253	2-hydroxyglutarate	Lipid	Fatty Acid, Dicarboxylate	100002070	HMDB00606	0.0202974	0.0123464	0.100447	1	0.154471
met46923	X - 21752	Pathway missing	Pathway missing			0.0924691	0.0562954	0.100736	1	0.154707
met1124	myo-inositol	Lipid	Inositol Metabolism	363	HMDB00211	0.0176437	0.0107847	0.102103	1	0.156595
met52848	X - 24527	Pathway missing	Pathway missing			0.0320588	0.0196076	0.102315	1	0.156709
met57746	anthranilate	Amino Acid	Tryptophan Metabolism	1258	HMDB01123	0.0578791	0.0354517	0.102829	1	0.157284
met53010	lactosyl-N-palmitoyl-sphingosine (d18:1/16:0)	Lipid	Ceramides	100009030		-0.010567	0.00648171	0.10331	1	0.157808
met52863	vanillic acid glycine	Xenobiotics	Food Component/Plant	100021363	HMDB60026	0.0545161	0.0334632	0.103559	1	0.157977
met46488	X - 11847	Pathway missing	Pathway missing			0.0924667	0.0569792	0.104908	1	0.15982
met40007	carboxyethyl-GABA	Amino Acid	Glutamate Metabolism	100003260	HMDB02201	-0.0168984	0.0104271	0.105379	1	0.160323
met15705	cystathionine	Amino Acid	Methionine, Cysteine, SAM and Taurine Metabolism	310	HMDB00099	-0.0387074	0.0239501	0.106329	1	0.161552
met57478	sphingomyelin (d18:1/25:0, d19:0/24:1, d20:1/23:0, d19:1/24:0)*	Lipid	Sphingolipid Metabolism	100015792		0.0164668	0.0102008	0.106736	1	0.161955
met47662	X - 12830	Pathway missing	Pathway missing			-0.078493	0.0486687	0.107056	1	0.162223
met1118	arachidate (20:0)	Lipid	Long Chain Fatty Acid	893	HMDB02212	-0.0081114	0.0050314	0.107219	1	0.162254
met40406	trimethylamine N-oxide	Lipid	Phospholipid Metabolism	100003397	HMDB00925	0.0239551	0.0150355	0.111393	1	0.168347
met52876	X - 24555	Pathway missing	Pathway missing			0.0610616	0.0386724	0.114618	1	0.172992
met38276	2,3-dihydroxyisovalerate	Xenobiotics	Food Component/Plant	100002417	HMDB12141	-0.0508843	0.0322432	0.114818	1	0.173063
met40461	paroxetine	Xenobiotics	Drug - Psychoactive	100003442		0.0340751	0.021708	0.116959	1	0.176058
met48761	1,2,3-benzenetriol sulfate (1)	Xenobiotics	Chemical	100006373		0.103729	0.0661518	0.117185	1	0.176164
met46627	X - 12740	Pathway missing	Pathway missing			-0.0907121	0.05804	0.118345	1	0.177674
met37200	5alpha-pregnan-3beta,20alpha-diol monosulfate (2)	Lipid	Progestin Steroids	100002014		-0.0454356	0.0291071	0.118802	1	0.178124
met35107	isovalerylglycine	Amino Acid	Leucine, Isoleucine and Valine Metabolism	100001452	HMDB00678	0.0537001	0.0344823	0.119667	1	0.179186
met18394	theophylline	Xenobiotics	Xanthine Metabolism	100000437	HMDB01889	0.0978266	0.0631662	0.121726	1	0.182029
met1419	5-methylthioadenosine (MTA)	Amino Acid	Polyamine Metabolism	212	HMDB01173	-0.0107022	0.00693219	0.122902	1	0.183547
met47821	undecenoylcarnitine (C11:1)	Lipid	Fatty Acid Metabolism (Acyl Carnitine, Monounsaturated)	100021131		-0.0164446	0.0107159	0.125161	1	0.186676
met46511	X - 16938	Pathway missing	Pathway missing			0.0215013	0.0140436	0.126021	1	0.187713
met18476	glycocholate	Lipid	Primary Bile Acid Metabolism	342	HMDB00138	-0.0452998	0.0296901	0.127349	1	0.189442
met38609	pantoprazole	Xenobiotics	Drug - Gastrointestinal	100002808	HMDB05017	0.0438669	0.0288367	0.128583	1	0.191027
met19130	1,2-dipalmitoyl-GPC (16:0/16:0)	Lipid	Phosphatidylcholine (PC)	100000657	HMDB00564	0.00675505	0.00444471	0.128832	1	0.191149
met39625	hydrochlorothiazide	Xenobiotics	Drug - Cardiovascular	100002734	HMDB01928	0.114801	0.0762719	0.132594	1	0.196473
met47417	X - 22162	Pathway missing	Pathway missing			0.0129391	0.00861745	0.133497	1	0.197554
met40479	2-oxindole-3-acetate	Xenobiotics	Food Component/Plant	100003109	HMDB35514	0.173583	0.116341	0.135963	1	0.200943
met46487	X - 21442	Pathway missing	Pathway missing			0.106572	0.0716606	0.137232	1	0.202556
met32497	10-undecenoate (11:1n1)	Lipid	Medium Chain Fatty Acid	100001197	HMDB33724	0.0163913	0.0110896	0.139662	1	0.205806
met34445	sphingosine 1-phosphate	Lipid	Sphingolipid Metabolism	100000626	HMDB00277	0.0105166	0.0071175	0.139796	1	0.205806
met46398	X - 21353	Pathway missing	Pathway missing			0.0192576	0.0130669	0.140811	1	0.206835
met46691	X - 17146	Pathway missing	Pathway missing			-0.053236	0.0361233	0.140859	1	0.206835
met38301	dextromethorphan	Xenobiotics	Drug - Respiratory	100000740	HMDB01920	0.0440417	0.0299244	0.141313	1	0.206968
met47101	N-methylpipecolate	Xenobiotics	Bacterial/Fungal	100005383		0.0855806	0.0581414	0.141284	1	0.206968
met1123	inosine	Nucleotide	Purine Metabolism, (Hypo)Xanthine/Inosine containing	361	HMDB00195	0.0284292	0.019353	0.14211	1	0.2076
met36600	1-linoleoyl-GPE (18:2)*	Lipid	Lysophospholipid	100001570	HMDB11507	-0.0129237	0.00879747	0.142101	1	0.2076
met22206	theanine	Xenobiotics	Food Component/Plant	100000784	HMDB34365	0.132205	0.0901015	0.142576	1	0.208015
met55017	4-hydroxyphenylacetylglutamine	Peptide	Acetylated Peptides	100010850		-0.0408614	0.0279667	0.14427	1	0.210216
met57591	beta-cryptoxanthin	Cofactors and Vitamins	Vitamin A Metabolism	100001977	HMDB33844	0.0283226	0.019457	0.145759	1	0.212115
met17799	ibuprofen	Xenobiotics	Drug - Analgesics, Anesthetics	1487	HMDB01925	0.0582957	0.0402648	0.147973	1	0.215062
met39592	S-methylcysteine	Amino Acid	Methionine, Cysteine, SAM and Taurine Metabolism	100002749	HMDB02108	0.0165086	0.0114672	0.150258	1	0.218104
met41494	alliin	Xenobiotics	Food Component/Plant	100003473	HMDB33592	-0.155354	0.108862	0.153835	1	0.223011
met54907	hexanoylglutamine	Lipid	Fatty Acid Metabolism (Acyl Glutamine)	100001733		0.0333191	0.0235178	0.156814	1	0.227042
met33442	pseudouridine	Nucleotide	Pyrimidine Metabolism, Uracil containing	821	HMDB00767	-0.007755	0.00550737	0.159376	1	0.230457
met33952	myristoylcarnitine (C14)	Lipid	Fatty Acid Metabolism(Acyl Carnitine)	100001270	HMDB05066	-0.0138476	0.00987032	0.160904	1	0.232372
met33364	gamma-glutamylthreonine	Peptide	Gamma-glutamyl Amino Acid	100001314	HMDB29159	-0.0104936	0.00753688	0.164096	1	0.236681
met53026	3,4-methyleneheptanoate	Xenobiotics	Food Component/Plant	100006651		0.137911	0.0992216	0.16483	1	0.237439
met36099	4-ethylphenylsulfate	Xenobiotics	Benzoate Metabolism	100001756		-0.0469184	0.0338818	0.166406	1	0.239104
met48130	N6-succinyladenosine	Nucleotide	Purine Metabolism, Adenine containing	100001664	HMDB00912	0.035042	0.0252998	0.166298	1	0.239104
met43334	O-desmethylvenlafaxine	Xenobiotics	Drug - Psychoactive	100004173	HMDB60532	0.0585276	0.0423924	0.16766	1	0.240602
met1585	N-acetylalanine	Amino Acid	Alanine and Aspartate Metabolism	1110	HMDB00766	-0.0060422	0.00438004	0.16801	1	0.2408
met43534	allopurinol	Xenobiotics	Drug - Metabolic	100004518		-0.0168101	0.0123359	0.173171	1	0.247885
met32346	glycochenodeoxycholate	Lipid	Primary Bile Acid Metabolism	1628	HMDB00637	-0.0355936	0.0262168	0.174838	1	0.249957
met54960	oleoyl-arachidonoyl-glycerol (18:1/20:4) [1]*	Lipid	Diacylglycerol	100010936	HMDB07228	0.0354778	0.0261842	0.175715	1	0.250895
met43255	N-acetyl-1-methylhistidine*	Amino Acid	Histidine Metabolism	100004299		-0.0284018	0.0212217	0.181046	1	0.258184
met33384	salicyluric glucuronide*	Xenobiotics	Drug - Analgesics, Anesthetics	100001332		-0.166136	0.12494	0.18387	1	0.261882
met49515	X - 23639	Pathway missing	Pathway missing			0.0151081	0.0114017	0.185405	1	0.263739
met46539	N-acetylglucosamine/N-acetylgalactosamine	Carbohydrate	Aminosugar Metabolism	100006435	HMDB00215	0.0385995	0.0292876	0.18778	1	0.266784
met33955	1-palmitoyl-GPC (16:0)	Lipid	Lysophospholipid	100001263	HMDB10382	0.00576179	0.00441679	0.192321	1	0.272894
met47695	X - 12117	Pathway missing	Pathway missing			0.0226722	0.0174061	0.192991	1	0.273504
met43592	4-methylbenzenesulfonate	Xenobiotics	Chemical	100002390		0.0126461	0.00974047	0.194354	1	0.275093
met47670	X - 18899	Pathway missing	Pathway missing			-0.0174643	0.0134673	0.194966	1	0.275616
met54745	cetirizine	Xenobiotics	Drug - Respiratory	100009034	HMDB05032	0.0679346	0.0524478	0.195499	1	0.276026
met21151	saccharin	Xenobiotics	Food Component/Plant	100000870	HMDB29723	0.155926	0.120518	0.195996	1	0.276043
met48149	N-acetylglucosaminylasparagine	Carbohydrate	Aminosugar Metabolism	1215	HMDB00489	-0.0237422	0.0183463	0.195903	1	0.276043
met37478	docosapentaenoate (n6 DPA; 22:5n6)	Lipid	Polyunsaturated Fatty Acid (n3 and n6)	100001580	HMDB01976	0.0283597	0.0220013	0.197671	1	0.278059
met32807	taurocholenate sulfate	Lipid	Secondary Bile Acid Metabolism	100001990		0.021439	0.016662	0.198455	1	0.278818
met52913	pregabalin	Xenobiotics	Drug - Neurological	100008943		0.0137105	0.0106709	0.199044	1	0.2793
met47905	X - 12026	Pathway missing	Pathway missing			0.0114257	0.00892056	0.200526	1	0.281033
met48566	valsartan	Xenobiotics	Drug - Cardiovascular	100006232		-0.012907	0.0100977	0.202476	1	0.283417
met34401	5-acetylamino-6-formylamino-3-methyluracil	Xenobiotics	Xanthine Metabolism	100001402	HMDB11105	-0.121463	0.0955885	0.204089	1	0.284974
met47820	X - 17335	Pathway missing	Pathway missing			0.0216001	0.0169988	0.204089	1	0.284974
met42489	2-hydroxydecanoate	Lipid	Fatty Acid, Monohydroxy	100004089		-0.013884	0.0109402	0.204672	1	0.285437
met46932	X - 12104	Pathway missing	Pathway missing			0.036228	0.0285736	0.205098	1	0.285682
met54703	X - 24765	Pathway missing	Pathway missing			-0.0135067	0.010682	0.206345	1	0.287067
met46613	X - 12216	Pathway missing	Pathway missing			0.0291963	0.0233574	0.211554	1	0.293954
met46368	3-bromo-5-chloro-2,6-dihydroxybenzoic acid*	Xenobiotics	Chemical	100021707		-0.0143321	0.0115704	0.215712	1	0.299366
met46611	X - 12013	Pathway missing	Pathway missing			0.0592283	0.0478618	0.216153	1	0.299613
met54840	X - 24812	Pathway missing	Pathway missing			-0.0311778	0.0252109	0.21646	1	0.299674
met52673	1-(1-enyl-palmitoyl)-2-arachidonoyl-GPE (P-16:0/20:4)*	Lipid	Plasmalogen	100009002	HMDB11352	0.0110683	0.00899016	0.218519	1	0.302157
met1669	4-hydroxyphenylpyruvate	Amino Acid	Tyrosine Metabolism	1141	HMDB00707	0.0151398	0.0123511	0.220529	1	0.303849
met32506	2-linoleoylglycerol (18:2)	Lipid	Monoacylglycerol	100000987	HMDB11538	0.0459538	0.0374902	0.220544	1	0.303849
met42021	fexofenadine	Xenobiotics	Drug - Respiratory	100004018	HMDB05030	0.0388138	0.0316572	0.220453	1	0.303849
met38399	9,10-DiHOME	Lipid	Fatty Acid, Dihydroxy	179	HMDB04704	0.0368294	0.0302151	0.223135	1	0.307047
met35651	ectoine	Xenobiotics	Chemical	100001635		-0.0724602	0.0595581	0.223997	1	0.30786
met49555	X - 23678	Pathway missing	Pathway missing			0.0308258	0.0253625	0.22446	1	0.308125
met46592	X - 11299	Pathway missing	Pathway missing			-0.0362094	0.0301096	0.22939	1	0.314513
met32405	indolepropionate	Amino Acid	Tryptophan Metabolism	100001083	HMDB02302	-0.0282249	0.0235452	0.23088	1	0.316175
met42374	2-aminobutyrate	Amino Acid	Glutathione Metabolism	1128	HMDB00650	-0.0081679	0.00685506	0.233712	1	0.319668
met54787	lisinopril	Xenobiotics	Drug - Cardiovascular	100009389		-0.0856662	0.0722317	0.235872	1	0.322236
met15765	ethylmalonate	Amino Acid	Leucine, Isoleucine and Valine Metabolism	2054	HMDB00622	0.0143707	0.012136	0.236597	1	0.322838
met46358	4-allylcatechol sulfate	Xenobiotics	Benzoate Metabolism	100020578		-0.0447347	0.0378895	0.237985	1	0.324344
met32342	adenosine 5'-monophosphate (AMP)	Nucleotide	Purine Metabolism, Adenine containing	209	HMDB00045	0.0362149	0.030708	0.238515	1	0.324583
met47022	X - 21845	Pathway missing	Pathway missing			-0.051004	0.043269	0.238731	1	0.324583
met57719	X - 24952	Pathway missing	Pathway missing			0.0118012	0.010074	0.241609	1	0.328103
met47342	X - 18345	Pathway missing	Pathway missing			-0.0435242	0.0372398	0.242745	1	0.328862
met53240	sulfamethoxazole	Xenobiotics	Drug - Antibiotic	100009327	HMDB15150	0.019576	0.0167471	0.242593	1	0.328862
met43009	furosemide	Xenobiotics	Drug - Cardiovascular	100004241	HMDB01933	0.0302964	0.0259951	0.2441	1	0.330179
met52677	1-(1-enyl-palmitoyl)-2-linoleoyl-GPE (P-16:0/18:2)*	Lipid	Plasmalogen	100009069	HMDB11343	0.0121802	0.0104557	0.244298	1	0.330179
met38623	venlafaxine	Xenobiotics	Drug - Psychoactive	100002807	HMDB05016	0.0486839	0.0418741	0.245221	1	0.331033
met48407	dopamine 3-O-sulfate	Amino Acid	Tyrosine Metabolism	100006361	HMDB06275	0.0159959	0.0137832	0.246073	1	0.331791
met42989	N-methyltaurine	Amino Acid	Methionine, Cysteine, SAM and Taurine Metabolism	100004056		0.051049	0.0440717	0.246982	1	0.332622
met15650	N1-methyladenosine	Nucleotide	Purine Metabolism, Adenine containing	1242	HMDB03331	-0.0053672	0.00465829	0.249483	1	0.334801
met18374	methionine sulfoxide	Amino Acid	Methionine, Cysteine, SAM and Taurine Metabolism	100000039	HMDB02005	-0.0063927	0.00554166	0.248925	1	0.334801
met46973	X - 12718	Pathway missing	Pathway missing			0.0414032	0.0359196	0.249284	1	0.334801
met46652	taurochenodeoxycholic acid 3-sulfate	Lipid	Secondary Bile Acid Metabolism	100021093	HMDB02486	0.047143	0.0409531	0.249914	1	0.334985
met1552	erucate (22:1n9)	Lipid	Long Chain Fatty Acid	1087	HMDB02068	-0.01515	0.0131835	0.250722	1	0.335278
met47659	3-hydroxy-2-methylpyridine sulfate	Xenobiotics	Chemical	100020975		-0.0294462	0.025622	0.250699	1	0.335278
met47690	X - 12112	Pathway missing	Pathway missing			-0.0303344	0.0265144	0.25283	1	0.337701
met17747	sphingosine	Lipid	Sphingolipid Metabolism	297	HMDB00252	0.0219212	0.0192152	0.254184	1	0.339111
met42984	gemfibrozil	Xenobiotics	Drug - Metabolic	100004034	HMDB15371	-0.020259	0.0178175	0.255749	1	0.340743
met47818	X - 17328	Pathway missing	Pathway missing			0.0475175	0.0418121	0.256006	1	0.340743
met62106	N4-acetylsulfamethoxazole*	Xenobiotics	Drug - Antibiotic	100020243	HMDB13854	0.0275157	0.0242403	0.25647	1	0.340962
met46657	X - 14939	Pathway missing	Pathway missing			-0.0200314	0.0177731	0.259959	1	0.345197
met46799	oleoyl-linoleoyl-glycerol (18:1/18:2) [2]	Lipid	Diacylglycerol	100002990	HMDB07219	-0.0141885	0.0126055	0.260574	1	0.345609
met46142	mannitol/sorbitol	Carbohydrate	Fructose, Mannose and Galactose Metabolism	100001740	HMDB00247	0.024237	0.0217242	0.264803	1	0.35029
met46363	X - 21319	Pathway missing	Pathway missing			0.0185063	0.0165954	0.265026	1	0.35029
met46705	X - 17438	Pathway missing	Pathway missing			0.0341435	0.0306035	0.264798	1	0.35029
met46957	gulonate*	Cofactors and Vitamins	Ascorbate and Aldarate Metabolism	100001586	HMDB03290	0.014718	0.0133011	0.268716	1	0.354755
met46456	2-ketocaprylate	Amino Acid	Leucine, Isoleucine and Valine Metabolism	100020833	HMDB13211	-0.0198212	0.0180353	0.271981	1	0.358366
met52636	X - 24422	Pathway missing	Pathway missing			0.0268977	0.0244788	0.272081	1	0.358366
met47702	X - 12127	Pathway missing	Pathway missing			-0.0182808	0.0166853	0.273479	1	0.359791
met553	cotinine	Xenobiotics	Tobacco Metabolite	848	HMDB01046	-0.0721091	0.0661635	0.275994	1	0.362681
met32388	dodecanedioate (C12-DC)	Lipid	Fatty Acid, Dicarboxylate	100001102	HMDB00623	0.0177781	0.0163243	0.276366	1	0.36275
met47650	X - 11483	Pathway missing	Pathway missing			-0.0318118	0.0292772	0.277461	1	0.363768
met49543	X - 23666	Pathway missing	Pathway missing			-0.0338471	0.0316461	0.285037	1	0.373271
met1591	N-acetylvaline	Amino Acid	Leucine, Isoleucine and Valine Metabolism	1084	HMDB11757	-0.0059812	0.00561811	0.287284	1	0.37578
met42592	cimetidine	Xenobiotics	Drug - Gastrointestinal	100004011		0.00828619	0.00782014	0.289503	1	0.378249
met33939	N-acetylthreonine	Amino Acid	Glycine, Serine and Threonine Metabolism	100001274		-0.0059828	0.00566362	0.291033	1	0.379812
met46966	X - 12126	Pathway missing	Pathway missing			0.037738	0.0360292	0.295118	1	0.384702
met20699	erythritol	Xenobiotics	Food Component/Plant	100000846	HMDB02994	0.0135534	0.012982	0.296733	1	0.385923
met49521	X - 23644	Pathway missing	Pathway missing			-0.0320713	0.0307113	0.296585	1	0.385923
met47993	X - 17010	Pathway missing	Pathway missing			0.0288018	0.0277393	0.29935	1	0.388438
met52332	3-hydroxyhippurate sulfate	Xenobiotics	Benzoate Metabolism	100020410		-0.0480658	0.046285	0.299264	1	0.388438
met45415	3-(3-hydroxyphenyl)propionate sulfate	Xenobiotics	Benzoate Metabolism	100005391		0.113173	0.109363	0.300962	1	0.389642
met48762	1,2,3-benzenetriol sulfate (2)	Xenobiotics	Chemical	100006374		-0.12182	0.11765	0.300683	1	0.389642
met46507	X - 11850	Pathway missing	Pathway missing			0.0618969	0.0604717	0.306249	1	0.396036
met47955	X - 12906	Pathway missing	Pathway missing			-0.0290468	0.0285848	0.30976	1	0.400121
met43374	indolin-2-one	Xenobiotics	Food Component/Plant	100004318		0.0816496	0.080614	0.311362	1	0.401734
met46674	X - 21607	Pathway missing	Pathway missing			0.0194383	0.0192641	0.313156	1	0.403592
met33942	N-acetylasparagine	Amino Acid	Alanine and Aspartate Metabolism	100001257	HMDB06028	0.00931427	0.00930086	0.316835	1	0.407872
met31555	pyridoxate	Cofactors and Vitamins	Vitamin B6 Metabolism	100001121	HMDB00017	-0.0189825	0.0191846	0.32264	1	0.414875
met62069	3-hydroxyadipate*	Lipid	Fatty Acid, Dicarboxylate	100004396	HMDB00345	-0.0286664	0.0290329	0.323658	1	0.415715
met47784	X - 22520	Pathway missing	Pathway missing			-0.0399375	0.0405937	0.32541	1	0.417024
met47929	X - 12707	Pathway missing	Pathway missing			-0.0208726	0.0212107	0.32529	1	0.417024
met43580	hydroxypioglitazone (M-IV)	Xenobiotics	Drug - Metabolic	100004177		-0.0047913	0.00490311	0.328642	1	0.420692
met1868	cysteine	Amino Acid	Methionine, Cysteine, SAM and Taurine Metabolism	800	HMDB00574	-0.0075734	0.0077689	0.329853	1	0.421294
met49459	X - 23583	Pathway missing	Pathway missing			-0.039943	0.0409667	0.329766	1	0.421294
met48404	dimethyl sulfoxide (DMSO)	Xenobiotics	Chemical	100001549	HMDB02151	-0.0578165	0.0593906	0.330519	1	0.421671
met45413	O-sulfo-L-tyrosine	Xenobiotics	Chemical	100005384		0.00751731	0.00783031	0.337246	1	0.429771
met531	3-hydroxy-3-methylglutarate	Lipid	Mevalonate Metabolism	112	HMDB00355	0.00940321	0.00984467	0.339713	1	0.432431
met48050	3-hydroxydodecanedioate*	Lipid	Fatty Acid, Dicarboxylate	100001454	HMDB00413	-0.0397738	0.0417218	0.340631	1	0.433115
met34390	7-methylxanthine	Xenobiotics	Xanthine Metabolism	100001396	HMDB01991	0.060328	0.0634796	0.342139	1	0.434063
met554	adenine	Nucleotide	Purine Metabolism, Adenine containing	880	HMDB00034	0.00927549	0.00975714	0.341995	1	0.434063
met35160	oleoylcarnitine (C18:1)	Lipid	Fatty Acid Metabolism(Acyl Carnitine)	100001501	HMDB05065	-0.0070598	0.00746606	0.344554	1	0.43664
met569	caffeine	Xenobiotics	Xanthine Metabolism	849	HMDB01847	0.058314	0.0621815	0.348541	1	0.441202
met48187	N-acetyltaurine	Amino Acid	Methionine, Cysteine, SAM and Taurine Metabolism	100005466		0.0151184	0.0161811	0.350328	1	0.442479
met52966	azithromycin	Xenobiotics	Drug - Antibiotic	100008963	HMDB14352	0.0165612	0.0177222	0.350277	1	0.442479
met48425	phenylacetylcarnitine	Peptide	Acetylated Peptides	100006108		0.0325775	0.0352694	0.355853	1	0.448958
met48001	X - 17351	Pathway missing	Pathway missing			-0.024375	0.0264176	0.356376	1	0.449121
met31943	3-hydroxysebacate	Lipid	Fatty Acid, Monohydroxy	100001145	HMDB00350	-0.0275005	0.0300502	0.360304	1	0.453569
met32620	glycolithocholate sulfate*	Lipid	Secondary Bile Acid Metabolism	100001657	HMDB02639	0.0204963	0.0225496	0.363572	1	0.457025
met38600	omeprazole	Xenobiotics	Drug - Gastrointestinal	100002725	HMDB01913	0.0552419	0.0608595	0.364255	1	0.457025
met46630	X - 12816	Pathway missing	Pathway missing			0.0765602	0.0843228	0.36409	1	0.457025
met34399	3,7-dimethylurate	Xenobiotics	Xanthine Metabolism	100001398	HMDB01982	0.0831286	0.0917297	0.365013	1	0.457473
met52501	X - 24306	Pathway missing	Pathway missing			-0.0097156	0.0107986	0.368434	1	0.461252
met47883	o-hydroxyatorvastatin	Xenobiotics	Drug - Metabolic	100005933		-0.0561297	0.0624821	0.369203	1	0.461706
met34404	1,3,7-trimethylurate	Xenobiotics	Xanthine Metabolism	100001397	HMDB02123	0.0927432	0.103362	0.369766	1	0.461904
met52975	glycodeoxycholate sulfate	Lipid	Secondary Bile Acid Metabolism	100006642		0.0324002	0.0361437	0.370224	1	0.461968
met52960	aripiprazole	Xenobiotics	Drug - Psychoactive	100008941	HMDB05042	0.0110425	0.0123628	0.371867	1	0.46351
met43258	acisoga	Amino Acid	Polyamine Metabolism	100004541		0.0230436	0.0258594	0.37305	1	0.464475
met38140	1-hydroxy-2-naphthalenecarboxylate	Xenobiotics	Drug - Other	100002394		0.0271773	0.0305451	0.373747	1	0.464836
met47673	X - 19299	Pathway missing	Pathway missing			-0.0423088	0.0480687	0.378954	1	0.470796
met46612	ascorbic acid 3-sulfate*	Cofactors and Vitamins	Ascorbate and Aldarate Metabolism	100020409		-0.0077538	0.00884211	0.380707	1	0.472459
met27719	galactonate	Carbohydrate	Fructose, Mannose and Galactose Metabolism	100001026	HMDB00565	-0.0403774	0.0465296	0.385701	1	0.477615
met48433	N-formylphenylalanine	Amino Acid	Tyrosine Metabolism	100006056		-0.0210541	0.0242556	0.38557	1	0.477615
met57839	N6,N6-dimethyllysine	Pathway missing	Pathway missing			-0.0138772	0.0160508	0.387446	1	0.479254
met37097	tryptophan betaine	Amino Acid	Tryptophan Metabolism	100001743	HMDB61115	-0.024529	0.0285237	0.389996	1	0.481885
met46684	N2-acetyl,N6-methyllysine	Amino Acid	Lysine Metabolism	100020546		0.0334875	0.0390123	0.390857	1	0.482425
met46512	X - 21467	Pathway missing	Pathway missing			-0.0161329	0.0191642	0.400064	1	0.493254
met37196	5alpha-pregnan-3beta,20beta-diol monosulfate (1)	Lipid	Progestin Steroids	100002009		-0.0245744	0.0293418	0.402469	1	0.495681
met20676	maleate	Lipid	Fatty Acid, Dicarboxylate	100000707	HMDB00176	0.0135053	0.0161404	0.402916	1	0.495695
met47203	X - 13007	Pathway missing	Pathway missing			-0.0269928	0.0324513	0.405681	1	0.498558
met43249	N-delta-acetylornithine	Amino Acid	Urea cycle; Arginine and Proline Metabolism	100004523		-0.0116465	0.0140617	0.407699	1	0.499958
met49592	X - 11315	Pathway missing	Pathway missing			0.0114233	0.0137834	0.407404	1	0.499958
met46677	deoxycholic acid (12 or 24)-sulfate*	Lipid	Secondary Bile Acid Metabolism	100021712		0.0315509	0.0382634	0.409788	1	0.501979
met555	adenosine	Nucleotide	Purine Metabolism, Adenine containing	798	HMDB00050	0.0108191	0.0132072	0.412849	1	0.505185
met52473	gamma-tocopherol/beta-tocopherol	Cofactors and Vitamins	Tocopherol Metabolism	100008998		0.0119077	0.0146373	0.416094	1	0.508609
met33953	N-acetylarginine	Amino Acid	Urea cycle; Arginine and Proline Metabolism	100001266	HMDB04620	0.00847313	0.0104827	0.41908	1	0.511709
met49512	X - 23636	Pathway missing	Pathway missing			0.00621802	0.00771005	0.420119	1	0.512429
met22176	cysteine s-sulfate	Amino Acid	Methionine, Cysteine, SAM and Taurine Metabolism	100000808	HMDB00731	0.00877019	0.0109914	0.425082	1	0.517474
met47936	X - 12726	Pathway missing	Pathway missing			-0.0285679	0.0358094	0.425165	1	0.517474
met32391	1,3-dimethylurate	Xenobiotics	Xanthine Metabolism	100001106	HMDB01857	0.0684553	0.0884048	0.438891	1	0.533609
met33904	nonanoylcarnitine (C9)	Lipid	Fatty Acid Metabolism (Acyl Carnitine, Medium Chain)	100006620	HMDB13288	0.012902	0.0167727	0.441919	1	0.536717
met46706	lithocholate sulfate (1)	Lipid	Secondary Bile Acid Metabolism	100020823		-0.0262928	0.0342357	0.442655	1	0.537038
met38366	ibuprofen acyl glucuronide	Xenobiotics	Drug - Analgesics, Anesthetics	100002406		0.0505406	0.0661334	0.444908	1	0.539196
met46624	X - 12798	Pathway missing	Pathway missing			0.0135442	0.0179256	0.450062	1	0.544863
met27665	1-methylnicotinamide	Cofactors and Vitamins	Nicotinate and Nicotinamide Metabolism	55	HMDB00699	-0.0103743	0.013879	0.454927	1	0.550167
met54762	lamotrigine	Xenobiotics	Drug - Neurological	100009390	HMDB14695,HMDB05043	0.0115178	0.0154501	0.456257	1	0.551189
met35322	hydroquinone sulfate	Xenobiotics	Drug - Topical Agents	100001604	HMDB02434	-0.073731	0.10006	0.461357	1	0.55676
met15720	N-acetylglutamate	Amino Acid	Glutamate Metabolism	100000282	HMDB01138	0.0264589	0.035989	0.462367	1	0.557387
met57637	carotene diol (3)	Cofactors and Vitamins	Vitamin A Metabolism	100015968		-0.0139758	0.019269	0.468429	1	0.564098
met32350	1-methyl-4-imidazoleacetate	Amino Acid	Histidine Metabolism	100001208	HMDB02820	-0.0060511	0.00840267	0.471588	1	0.566702
met34424	5-acetylamino-6-amino-3-methyluracil	Xenobiotics	Xanthine Metabolism	100001403	HMDB04400	0.0369473	0.0512792	0.471355	1	0.566702
met43335	warfarin	Xenobiotics	Drug - Cardiovascular	100004175	HMDB01935	-0.0192448	0.0271166	0.477988	1	0.573237
met47917	X - 12306	Pathway missing	Pathway missing			-0.0260697	0.0367332	0.478033	1	0.573237
met1301	lysine	Amino Acid	Lysine Metabolism	407	HMDB00182	-0.002611	0.00370846	0.481541	1	0.576835
met46998	X - 21821	Pathway missing	Pathway missing			-0.0225068	0.0320218	0.482287	1	0.577122
met22001	3-hydroxyoctanoate	Lipid	Fatty Acid, Monohydroxy	100000773	HMDB01954	-0.0079684	0.0113868	0.484196	1	0.578797
met514	cytidine	Nucleotide	Pyrimidine Metabolism, Cytidine containing	827	HMDB00089	-0.0137171	0.0196952	0.486277	1	0.580675
met57448	glycosyl ceramide (d18:1/23:1, d17:1/24:1)*	Lipid	Ceramides	100015751		0.0261931	0.0386088	0.497645	1	0.593627
met15753	hippurate	Xenobiotics	Benzoate Metabolism	100000014	HMDB00714	0.0142729	0.0211318	0.499551	1	0.595276
met34400	1,7-dimethylurate	Xenobiotics	Xanthine Metabolism	100001399	HMDB11103	0.0362746	0.0540184	0.502024	1	0.597597
met54839	X - 24811	Pathway missing	Pathway missing			-0.0250854	0.0376688	0.505577	1	0.601198
met46417	X - 13866	Pathway missing	Pathway missing			0.0126471	0.0190795	0.507557	1	0.602922
met47921	X - 12410	Pathway missing	Pathway missing			0.0231801	0.0353534	0.512168	1	0.607766
met21025	iminodiacetate (IDA)	Xenobiotics	Chemical	100000900	HMDB11753	-0.003654	0.00559763	0.514022	1	0.60933
met46673	X - 16576	Pathway missing	Pathway missing			0.0231215	0.035522	0.515237	1	0.609781
met46700	X - 18922	Pathway missing	Pathway missing			-0.0112607	0.0173094	0.515474	1	0.609781
met46283	X - 15461	Pathway missing	Pathway missing			0.00605307	0.00943976	0.5215	1	0.615362
met47708	X - 12283	Pathway missing	Pathway missing			-0.0212563	0.0331175	0.521106	1	0.615362
met48993	branched-chain, straight-chain, or cyclopropyl 10:1 fatty acid (2)*	Partially Characterized Molecules	Partially Characterized Molecules	100021667		0.0302787	0.0472555	0.521814	1	0.615362
met38306	metformin	Xenobiotics	Drug - Metabolic	100002405	HMDB01921	-0.0363328	0.0568458	0.522856	1	0.615952
met43231	6-oxopiperidine-2-carboxylate	Amino Acid	Lysine Metabolism	100004499	HMDB61705	0.0176035	0.0276104	0.523884	1	0.616525
met15778	benzoate	Xenobiotics	Benzoate Metabolism	100000008	HMDB01870	0.033331	0.0527115	0.527297	1	0.619901
met1644	heptanoate (7:0)	Lipid	Medium Chain Fatty Acid	925	HMDB00666	0.0156485	0.0248588	0.529149	1	0.621436
met46497	hydroxy-CMPF*	Lipid	Fatty Acid, Dicarboxylate	100019794		0.0221615	0.0353263	0.53056	1	0.622451
met46898	butyrate (4:0)	Lipid	Short Chain Fatty Acid	1143	HMDB00039	-0.0214527	0.0343854	0.532828	1	0.624467
met48081	X - 22776	Pathway missing	Pathway missing			0.0182541	0.0293529	0.53414	1	0.625361
met39603	ethyl glucuronide	Xenobiotics	Chemical	100002849	HMDB10325	0.0716566	0.116025	0.536963	1	0.62802
met542	3-hydroxybutyrate (BHBA)	Lipid	Ketone Bodies	254	HMDB00357	0.0130361	0.0211412	0.53761	1	0.628132
met53230	3-hydroxyhexanoate	Lipid	Fatty Acid, Monohydroxy	100006367		0.00611346	0.00993635	0.538502	1	0.628529
met54910	vanillactate	Amino Acid	Tyrosine Metabolism	100006129	HMDB00913	0.0151403	0.025138	0.5471	1	0.637909
met2829	N-formylmethionine	Amino Acid	Methionine, Cysteine, SAM and Taurine Metabolism	194	HMDB01015	-0.00335	0.00558643	0.548848	1	0.639292
met15443	glucuronate	Carbohydrate	Aminosugar Metabolism	100000257	HMDB00127	-0.0090555	0.0154792	0.558656	1	0.650051
met47774	alpha-CMBHC glucuronide	Pathway missing	Pathway missing			-0.0258932	0.0451528	0.566445	1	0.658442
met27672	3-indoxyl sulfate	Amino Acid	Tryptophan Metabolism	100000467	HMDB00682	-0.0078027	0.0139225	0.575285	1	0.668035
met34419	1-linoleoyl-GPC (18:2)	Lipid	Lysophospholipid	100001395	HMDB10386	0.00367512	0.00661958	0.578869	1	0.670583
met46620	X - 12462	Pathway missing	Pathway missing			-0.0059374	0.010705	0.579247	1	0.670583
met62108	resveratrol sulfate (1)*	Xenobiotics	Food Component/Plant	100020245		0.00672205	0.0120878	0.578214	1	0.670583
met57515	lignoceroylcarnitine (C24)*	Lipid	Fatty Acid Metabolism(Acyl Carnitine)	100015834		0.00530179	0.00967483	0.583801	1	0.675168
met62151	X - 25172	Pathway missing	Pathway missing			0.0410251	0.0752923	0.585939	1	0.676952
met4968	alpha-ketobutyrate	Amino Acid	Methionine, Cysteine, SAM and Taurine Metabolism	796	HMDB00005	-0.0062465	0.0116907	0.593232	1	0.684683
met52340	N-carbamoylalanine	Amino Acid	Alanine and Aspartate Metabolism	100006369		-0.0158987	0.0301894	0.598552	1	0.690124
met49513	X - 23637	Pathway missing	Pathway missing			0.00426897	0.00820385	0.602921	1	0.694458
met52655	X - 24425	Pathway missing	Pathway missing			0.0135601	0.0261746	0.604515	1	0.69559
met45968	1-oleoyl-GPG (18:1)*	Lipid	Lysophospholipid	100005716		0.0188799	0.0366613	0.606667	1	0.697361
met37076	N-acetylserine	Amino Acid	Glycine, Serine and Threonine Metabolism	100001851	HMDB02931	-0.002851	0.00559958	0.610753	1	0.701349
met49469	X - 23593	Pathway missing	Pathway missing			-0.0033723	0.00664102	0.611698	1	0.701726
met18254	paraxanthine	Xenobiotics	Xanthine Metabolism	100000453	HMDB01860	0.0431681	0.086675	0.618549	1	0.708679
met47493	X - 11632	Pathway missing	Pathway missing			0.0147549	0.0296644	0.619004	1	0.708679
met33009	homostachydrine*	Xenobiotics	Food Component/Plant	100001550	HMDB33433	0.0237072	0.0477672	0.619773	1	0.708846
met18037	metoprolol	Xenobiotics	Drug - Cardiovascular	2028	HMDB01932	-0.0268863	0.0543081	0.620652	1	0.709139
met39379	glycoursodeoxycholate	Lipid	Secondary Bile Acid Metabolism	100002911	HMDB00708	0.0151512	0.0308751	0.623712	1	0.71192
met62109	resveratrol sulfate (2)*	Xenobiotics	Food Component/Plant	100020246		0.00559411	0.0114222	0.624434	1	0.71203
met46977	X - 15503	Pathway missing	Pathway missing			-0.0049738	0.0101811	0.625261	1	0.712259
met34598	nifedipine	Xenobiotics	Drug - Cardiovascular	100001514		0.0071972	0.0148071	0.627038	1	0.713215
met35635	3-(3-hydroxyphenyl)propionate	Xenobiotics	Benzoate Metabolism	100001624	HMDB00375	0.0561829	0.115701	0.627354	1	0.713215
met38658	atenolol	Xenobiotics	Drug - Cardiovascular	100002726	HMDB01924	0.0220939	0.0459645	0.630887	1	0.716517
met46355	2,6-dihydroxybenzoic acid	Xenobiotics	Drug - Topical Agents	100020837	HMDB13676	0.00888663	0.0185836	0.6326	1	0.717746
met46466	X - 11843	Pathway missing	Pathway missing			0.0310944	0.065811	0.636672	1	0.721646
met15586	maltose	Carbohydrate	Glycogen Metabolism	913	HMDB00163	0.0196011	0.0421339	0.641867	1	0.72681
met62110	resveratrol disulfate (1)*	Xenobiotics	Food Component/Plant	100020247		0.0101456	0.0218515	0.642518	1	0.726824
met38116	indole-3-carboxylic acid	Amino Acid	Tryptophan Metabolism	100002185	HMDB03320	-0.0095445	0.0208572	0.647318	1	0.731528
met42002	lanthionine	Xenobiotics	Chemical	100003892		-0.0506825	0.111833	0.650488	1	0.733653
met52689	1-(1-enyl-palmitoyl)-2-arachidonoyl-GPC (P-16:0/20:4)*	Lipid	Plasmalogen	100009014	HMDB11220	-0.0032471	0.00715259	0.649936	1	0.733653
met62145	glycine conjugate of C10H12O2*	Partially Characterized Molecules	Partially Characterized Molecules	100020253		0.0135086	0.0298877	0.65137	1	0.73392
met48698	6-hydroxyindole sulfate	Xenobiotics	Chemical	100006260		-0.0073343	0.0162948	0.652724	1	0.734719
met43496	3-hydroxyquinine	Xenobiotics	Drug - Antibiotic	100002410	HMDB01091	0.0097998	0.0220266	0.65644	1	0.73817
met21184	1-oleoylglycerol (18:1)	Lipid	Monoacylglycerol	100000924	HMDB11567	-0.0078887	0.0182897	0.666321	1	0.748542
met34395	1-methylurate	Xenobiotics	Xanthine Metabolism	100001400	HMDB03099	-0.047171	0.109918	0.667896	1	0.749571
met62071	perfluorooctanoate (PFOA)*	Xenobiotics	Chemical	100020208	HMDB59587	-0.0059247	0.0138794	0.66955	1	0.750687
met42981	diltiazem	Xenobiotics	Drug - Cardiovascular	100004015	HMDB14487	0.0106258	0.0254282	0.676145	1	0.757335
met52357	O-desmethyltramadol glucuronide	Xenobiotics	Drug - Analgesics, Anesthetics	100006383		0.0105108	0.0255959	0.6814	1	0.762471
met62111	resveratrol disulfate (2)*	Xenobiotics	Food Component/Plant	100020248		0.00859411	0.0209952	0.682347	1	0.76278
met57641	levetiracetam	Xenobiotics	Drug - Neurological	100015873		0.0179758	0.0441149	0.683743	1	0.763592
met52949	enalapril	Xenobiotics	Drug - Cardiovascular	100008948		-0.0051416	0.0126551	0.684577	1	0.763774
met57642	metronidazole	Xenobiotics	Drug - Antibiotic	100015878	HMDB15052	0.00275627	0.00680924	0.68575	1	0.764332
met43256	N-acetyl-3-methylhistidine*	Amino Acid	Histidine Metabolism	100002204		-0.0157096	0.0389222	0.686572	1	0.7645
met2772	topiramate	Xenobiotics	Drug - Neurological	1388	HMDB05034	-0.0052642	0.0131413	0.68878	1	0.766209
met57716	X - 24949	Pathway missing	Pathway missing			0.00926458	0.0232798	0.690727	1	0.767625
met42613	famotidine	Xenobiotics	Drug - Gastrointestinal	100003964	HMDB01919	0.00605867	0.0153252	0.692638	1	0.767722
met43424	dimethyl sulfone	Xenobiotics	Chemical	100004284	HMDB04983	-0.0257553	0.0651858	0.692839	1	0.767722
met52954	sitagliptin	Xenobiotics	Drug - Metabolic	100008964		0.00490861	0.0123721	0.691602	1	0.767722
met35320	catechol sulfate	Xenobiotics	Benzoate Metabolism	100001605	HMDB59724	-0.0067097	0.0170327	0.693706	1	0.767936
met39789	glycyrrhetinate	Xenobiotics	Food Component/Plant	100002856	HMDB11628	-0.037266	0.0962713	0.69876	1	0.772032
met49675	X - 23776	Pathway missing	Pathway missing			0.0166039	0.0428943	0.698764	1	0.772032
met36754	octadecanedioate (C18-DC)	Lipid	Fatty Acid, Dicarboxylate	100001615	HMDB00782	0.00873496	0.0226923	0.700362	1	0.773014
met39767	quinine	Xenobiotics	Drug - Antibiotic	100002968		-0.0147976	0.0385333	0.701011	1	0.773014
met61505	1-cerotoyl-GPC (26:0)*	Lipid	Lysophospholipid	100015772	HMDB29205	0.00954794	0.0249477	0.702001	1	0.773356
met47666	alpha-CEHC sulfate	Cofactors and Vitamins	Tocopherol Metabolism	100005972		0.0147504	0.038675	0.702984	1	0.77369
met18281	2-hydroxyhippurate (salicylurate)	Xenobiotics	Benzoate Metabolism	1869	HMDB00840	-0.0178652	0.0472607	0.705492	1	0.775104
met46687	X - 18779	Pathway missing	Pathway missing			0.00328547	0.00869594	0.70563	1	0.775104
met30460	1-methylhistidine	Amino Acid	Histidine Metabolism	100001051	HMDB00001	-0.0047053	0.0125666	0.708158	1	0.77713
met62146	glycine conjugate of C10H14O2 (1)*	Partially Characterized Molecules	Partially Characterized Molecules	100020254		-0.0085486	0.0230289	0.710553	1	0.779008
met46266	X - 15486	Pathway missing	Pathway missing			-0.0056912	0.0154735	0.713092	1	0.781038
met15677	3-methylhistidine	Amino Acid	Histidine Metabolism	100000042	HMDB00479	0.0115306	0.0315414	0.714754	1	0.782106
met42990	verapamil	Xenobiotics	Drug - Cardiovascular	100004028	HMDB01850	0.00360807	0.00994377	0.716772	1	0.78356
met40708	pregnanediol-3-glucuronide	Lipid	Progestin Steroids	100003470	HMDB10318	0.00903753	0.0252029	0.719966	1	0.786297
met33139	pioglitazone	Xenobiotics	Drug - Metabolic	100001317	HMDB15264	-0.0012638	0.0036147	0.726673	1	0.792861
met57514	behenoylcarnitine (C22)*	Lipid	Fatty Acid Metabolism(Acyl Carnitine)	100015832		0.00686556	0.0198171	0.729076	1	0.794721
met37033	carbamazepine	Xenobiotics	Drug - Neurological	100001933	HMDB14704	0.00249681	0.00769013	0.745465	1	0.809484
met48448	3-hydroxypyridine sulfate	Xenobiotics	Chemical	100006098		-0.0119512	0.0367116	0.744828	1	0.809484
met57668	dexlansoprazole	Xenobiotics	Drug - Gastrointestinal	100015794		0.0111151	0.0341907	0.745174	1	0.809484
met57794	ondansetron	Xenobiotics	Drug - Gastrointestinal	100015776	HMDB05035	0.00221511	0.00681311	0.745129	1	0.809484
met37020	carbamazepine 10,11-epoxide*	Xenobiotics	Drug - Neurological	100002321	HMDB60658	0.00245803	0.00763981	0.74769	1	0.810399
met37056	carbamazepine glucuronide*	Xenobiotics	Drug - Neurological	100002322		0.00244828	0.00761083	0.747732	1	0.810399
met54967	palmitoleoyl-linoleoyl-glycerol (16:1/18:2) [1]*	Lipid	Diacylglycerol	100010930	HMDB07132	0.00882296	0.0276022	0.749293	1	0.811318
met43507	3b-hydroxy-5-cholenoic acid	Lipid	Secondary Bile Acid Metabolism	100004182	HMDB00308	0.00852891	0.0276712	0.757967	1	0.81993
met57531	nervonoylcarnitine (C24:1)*	Lipid	Fatty Acid Metabolism(Acyl Carnitine)	100015846		-0.0036106	0.0118452	0.760561	1	0.821955
met2132	citrulline	Amino Acid	Urea cycle; Arginine and Proline Metabolism	391	HMDB00904	-0.0016204	0.0054206	0.765047	1	0.826019
met57783	1H-indole-7-acetic acid	Xenobiotics	Bacterial/Fungal	100004601		-0.0181104	0.0614783	0.768368	1	0.828818
met1114	deoxycholate	Lipid	Secondary Bile Acid Metabolism	302	HMDB00626	-0.0055227	0.0189603	0.770895	1	0.830756
met32446	guanidinosuccinate	Amino Acid	Guanidino and Acetamido Metabolism	100001212	HMDB03157	0.00998229	0.0348111	0.774349	1	0.833563
met39787	quetiapine	Xenobiotics	Drug - Psychoactive	100002809	HMDB05021	0.00323398	0.0113099	0.774965	1	0.833563
met46614	4-ethylcatechol sulfate	Xenobiotics	Benzoate Metabolism	100020536		0.00804726	0.0283412	0.776507	1	0.833647
met57754	X - 24970	Pathway missing	Pathway missing			-0.0066257	0.0233318	0.776469	1	0.833647
met34389	1-methylxanthine	Xenobiotics	Xanthine Metabolism	100001405	HMDB10738	-0.0238245	0.0851731	0.779744	1	0.834737
met38595	ranitidine	Xenobiotics	Drug - Gastrointestinal	100002735	HMDB01930	-0.011803	0.0423367	0.780457	1	0.834737
met52747	phenol glucuronide	Amino Acid	Tyrosine Metabolism	100006679	HMDB60014	0.0112775	0.0402335	0.779297	1	0.834737
met53239	O-desmethyltramadol	Xenobiotics	Drug - Analgesics, Anesthetics	100006382	HMDB60997	0.00715014	0.0254313	0.778636	1	0.834737
met54945	oleoyl-oleoyl-glycerol (18:1/18:1) [1]*	Lipid	Diacylglycerol	100010918	HMDB07218	0.00791865	0.0286077	0.781981	1	0.835581
met43579	ketopioglitazone	Xenobiotics	Drug - Metabolic	100004176		-0.002038	0.00744962	0.784442	1	0.836682
met54885	1-linoleoyl-GPG (18:2)*	Lipid	Lysophospholipid	100009227		0.00314629	0.0115017	0.784481	1	0.836682
met2342	serotonin	Amino Acid	Tryptophan Metabolism	504	HMDB00259	0.0121445	0.0447791	0.786276	1	0.837811
met34109	metoprolol acid metabolite*	Xenobiotics	Drug - Cardiovascular	100001385		-0.0195319	0.0725205	0.78773	1	0.838575
met47671	X - 18921	Pathway missing	Pathway missing			0.00384339	0.0148029	0.795191	1	0.845726
met32553	phenol sulfate	Amino Acid	Tyrosine Metabolism	100001510	HMDB60015	0.00481073	0.0188233	0.798325	1	0.848182
met40062	4-hydroxy-2-oxoglutaric acid	Lipid	Fatty Acid, Dicarboxylate	100002537	HMDB02070	0.0088275	0.0346566	0.79899	1	0.848182
met38619	atorvastatin (lipitor)	Xenobiotics	Drug - Metabolic	100002802	HMDB05006	-0.012358	0.0502823	0.805903	1	0.854722
met35678	hexadecanedioate (C16-DC)	Lipid	Fatty Acid, Dicarboxylate	100001614	HMDB00672	0.00330852	0.0136639	0.808718	1	0.856112
met48996	(2 or 3)-decenoate (10:1n7 or n8)	Lipid	Medium Chain Fatty Acid	100021502		0.0075451	0.0311323	0.808551	1	0.856112
met32578	X - 11261	Pathway missing	Pathway missing			0.00340027	0.0142758	0.81178	1	0.858555
met56	cystine	Amino Acid	Methionine, Cysteine, SAM and Taurine Metabolism	279	HMDB00192	0.00211606	0.00909727	0.816109	1	0.862332
met32412	butyrylcarnitine (C4)	Lipid	Fatty Acid Metabolism (also BCAA Metabolism)	100001054	HMDB02013	0.00284984	0.0125104	0.819843	1	0.865474
met38127	S-methylmethionine	Amino Acid	Methionine, Cysteine, SAM and Taurine Metabolism	100002183	HMDB38670	0.00912479	0.0413317	0.825312	1	0.87044
met35253	2-palmitoyl-GPC (16:0)*	Lipid	Lysophospholipid	100001562	HMDB61702	-0.0014036	0.00673547	0.834961	1	0.878176
met40478	equol sulfate	Xenobiotics	Food Component/Plant	100003429		-0.0084548	0.0402583	0.833695	1	0.878176
met46366	3,5-dichloro-2,6-dihydroxybenzoic acid	Xenobiotics	Chemical	100021324		0.00232402	0.0112055	0.835733	1	0.878176
met575	arabinose	Carbohydrate	Pentose Metabolism	828	HMDB00646	0.0055054	0.0264381	0.835082	1	0.878176
met1515	salicylate	Xenobiotics	Drug - Topical Agents	501	HMDB01895	-0.0085995	0.0426471	0.840232	1	0.882018
met57614	ciprofloxacin	Xenobiotics	Drug - Antibiotic	100000687		0.0019042	0.0094867	0.84094	1	0.882018
met35130	N4-acetylcytidine	Nucleotide	Pyrimidine Metabolism, Cytidine containing	100001413	HMDB05923	0.0045289	0.0227845	0.842477	1	0.882816
met48428	pyrraline	Xenobiotics	Food Component/Plant	100001767	HMDB33143	-0.0143743	0.0737992	0.845605	1	0.885279
met53031	methylsuccinoylcarnitine	Amino Acid	Leucine, Isoleucine and Valine Metabolism	100009275		0.00852858	0.0459593	0.852816	1	0.892008
met1496	methylmalonate (MMA)	Lipid	Fatty Acid Metabolism (also BCAA Metabolism)	418	HMDB00202	-0.0061089	0.0342184	0.858339	1	0.89696
met47804	X - 16580	Pathway missing	Pathway missing			-0.0020149	0.011643	0.862637	1	0.900625
met1899	quinolinate	Cofactors and Vitamins	Nicotinate and Nicotinamide Metabolism	182	HMDB00232	-0.0024818	0.0145366	0.86447	1	0.901711
met39600	3-hydroxyhippurate	Xenobiotics	Benzoate Metabolism	100002122	HMDB06116	0.00551273	0.032689	0.866108	1	0.902353
met43847	glycerol 3-phosphate	Lipid	Glycerolipid Metabolism	100000258	HMDB00126	0.00238435	0.0142547	0.867189	1	0.902353
met53001	solifenacin	Xenobiotics	Drug - Other	100008973		0.00266777	0.0159833	0.867464	1	0.902353
met15772	ribitol	Carbohydrate	Pentose Metabolism	100000406	HMDB00508	-0.0013547	0.00930721	0.8843	1	0.918187
met38686	gabapentin	Xenobiotics	Drug - Neurological	100002806	HMDB05015	0.00594064	0.0405379	0.883551	1	0.918187
met52603	1,2-dilinoleoyl-GPC (18:2/18:2)	Lipid	Phosphatidylcholine (PC)	100008903	HMDB08138	0.0012196	0.00851725	0.886164	1	0.919284
met54956	linoleoyl-arachidonoyl-glycerol (18:2/20:4) [2]*	Lipid	Diacylglycerol	100010923	HMDB07257	-0.0035356	0.0254152	0.889386	1	0.921786
met49704	ethyl beta-glucopyranoside	Pathway missing	Pathway missing			0.00527804	0.0382481	0.890268	1	0.921861
met61866	heptenedioate (C7:1-DC)*	Lipid	Fatty Acid, Dicarboxylate	100019981		-0.001775	0.0134617	0.895119	1	0.926042
met31787	3-carboxy-4-methyl-5-propyl-2-furanpropanoate (CMPF)	Lipid	Fatty Acid, Dicarboxylate	100001178	HMDB61112	-0.0045378	0.0359105	0.899466	1	0.929693
met52870	X - 24549	Pathway missing	Pathway missing			0.00451951	0.0370754	0.902999	1	0.932498
met34534	laurylcarnitine (C12)	Lipid	Fatty Acid Metabolism(Acyl Carnitine)	100001392	HMDB02250	0.00156495	0.0130163	0.904321	1	0.933017
met22138	homocitrulline	Amino Acid	Urea cycle; Arginine and Proline Metabolism	100000963	HMDB00679	0.00246684	0.021002	0.906518	1	0.934287
met54923	beta-citrylglutamate	Amino Acid	Glutamate Metabolism	100003271		-0.0010511	0.0090144	0.907194	1	0.934287
met15745	methylsuccinate	Amino Acid	Leucine, Isoleucine and Valine Metabolism	2051	HMDB01844	0.00140489	0.01325	0.915577	1	0.941216
met62104	gamma-glutamylcitrulline*	Peptide	Gamma-glutamyl Amino Acid	100020241		-0.0010895	0.0102673	0.91551	1	0.941216
met15581	xylose	Carbohydrate	Pentose Metabolism	826	HMDB00098	0.00249418	0.0245869	0.919216	1	0.944104
met15749	3-phenylpropionate (hydrocinnamate)	Xenobiotics	Benzoate Metabolism	100000010	HMDB00764	0.00826854	0.08561	0.923074	1	0.945507
met1589	N-acetylmethionine	Amino Acid	Methionine, Cysteine, SAM and Taurine Metabolism	1083	HMDB11745	-0.0006833	0.00706099	0.922927	1	0.945507
met1643	fumarate	Energy	TCA Cycle	330	HMDB00134	0.00140959	0.0145893	0.923046	1	0.945507
met35669	tetradecanedioate (C14-DC)	Lipid	Fatty Acid, Dicarboxylate	100001613	HMDB00872	0.00148226	0.0161892	0.927065	1	0.947888
met39586	pseudoephedrine	Xenobiotics	Drug - Respiratory	100002738	HMDB01943	-0.0034182	0.0369854	0.926379	1	0.947888
met31938	5-hydroxyhexanoate	Lipid	Fatty Acid, Monohydroxy	100001148	HMDB00525	0.00284526	0.0336425	0.932615	1	0.952707
met22036	2-hydroxyoctanoate	Lipid	Fatty Acid, Monohydroxy	100000743	HMDB02264	-0.0014917	0.0189204	0.937173	1	0.955928
met49526	3-hydroxypyridine glucuronide	Xenobiotics	Chemical	100020591		-0.0019759	0.0251723	0.937448	1	0.955928
met48080	4-chlorobenzoic acid	Pathway missing	Pathway missing			-0.0020281	0.0269384	0.940001	1	0.957673
met37210	androstenediol (3beta,17beta) monosulfate (2)	Lipid	Androgenic Steroids	100002029		0.00179979	0.0258565	0.944519	1	0.961416
met54946	oleoyl-oleoyl-glycerol (18:1/18:1) [2]*	Lipid	Diacylglycerol	100010919	HMDB07218	0.00103672	0.0154597	0.946546	1	0.962618
met52716	1-(1-enyl-palmitoyl)-2-palmitoyl-GPC (P-16:0/16:0)*	Lipid	Plasmalogen	100009162	HMDB11206	-0.0003906	0.00604259	0.948466	1	0.963709
met33943	N-acetylglutamine	Amino Acid	Glutamate Metabolism	100001253	HMDB06029	0.00076793	0.0122018	0.949828	1	0.964232
met53267	X - 24748	Pathway missing	Pathway missing			-0.0006806	0.0134585	0.959678	1	0.973364
met36752	N6-acetyllysine	Amino Acid	Lysine Metabolism	100001734	HMDB00206	-0.0002717	0.00667308	0.967532	1	0.979583
met52877	X - 24556	Pathway missing	Pathway missing			-0.0006674	0.0161932	0.967131	1	0.979583
met47878	atorvastatin lactone	Xenobiotics	Drug - Metabolic	100005940		-0.0011178	0.0287747	0.96902	1	0.980218
met48052	X - 17612	Pathway missing	Pathway missing			-0.0013993	0.040291	0.9723	1	0.982662
met42574	glycohyocholate	Lipid	Secondary Bile Acid Metabolism	100004083		0.00124497	0.0394211	0.974812	1	0.984326
met18280	gentisate	Amino Acid	Tyrosine Metabolism	100000447	HMDB00152	-0.000526	0.0227699	0.981574	1	0.989513
met52665	X - 24435	Pathway missing	Pathway missing			0.00144185	0.0628033	0.981687	1	0.989513
met39788	solanidine	Xenobiotics	Food Component/Plant	100002773	HMDB03236	0.00215412	0.116268	0.985221	1	0.992196
met48680	N-acetyl sulfapyridine	Xenobiotics	Drug - Antibiotic	100006229		-2.84e-15	3.8e-08	1	1	1
met52961	sildenafil	Xenobiotics	Drug - Cardiovascular	100008971	HMDB05039	-2.78e-13	1.34e-08	0.999989	1	1
met53241	tramadol	Xenobiotics	Drug - Analgesics, Anesthetics	100006381	HMDB14339	0.00023378	0.0322744	0.994222	1	1
met53256	olmesartan	Xenobiotics	Drug - Cardiovascular	100006239	HMDB14420	9.49e-06	0.00205987	0.996326	1	1
met54738	alpha-hydroxymetoprolol	Xenobiotics	Drug - Cardiovascular	100006385	HMDB60994	-6.04e-05	0.0332235	0.998549	1	1
met54792	mycophenolic acid glucuronide	Xenobiotics	Drug - Antiinflammatory, Immunosuppressant	100009254		-2.12e-13	1.68e-08	0.999992	1	1
met57646	baclofen	Xenobiotics	Drug - Neurological	100015779	HMDB14327	2.27e-13	8.92e-09	0.999988	1	1
met62068	N-methylhydroxyproline**	Amino Acid	Urea cycle; Arginine and Proline Metabolism	100020215		0.00010176	0.0389356	0.997915	1	1
