# Supplementary material for: Assessing the Biological Mechanisms Linking Smoking Behavior and Cognitive Function: A Mediation Analysis of Untargeted Metabolomics
Source: Metabolites. 2023 Nov 16;13(11):1154. doi: 10.3390/metabo13111154 (PMC10673384; doi:10.3390/metabo13111154)
Supplement: Supplementary file 1 [file metabolites-13-01154-s001.zip › Supplemental Table S3.xlsx]

## Sheet: CSF-PACC3
Supplementary Table S3. Associations between metabolites and cognitive function. Each linear mixed model included a random intercept for the individual and a random slope for age.
The outcome was a cognitive function and metabolite, smoking status, sex, race, education level, practice effect.
COMP.ID	Estimate	Std..Error	df	t.value	Pr...t..	Bon	FDR
met32198	0.545303	0.178055	213.22	3.06256	0.00247713	0.104039	0.104039
met36746	0.431855	0.210415	225.218	2.05239	0.0412876	1	0.445465
met48187	0.534652	0.245071	245.94	2.18162	0.0300848	1	0.445465
met46902	-0.163399	0.0800978	244.741	-2.03999	0.0424252	1	0.445465
met43807	0.252263	0.144347	256.466	1.74762	0.0817268	1	0.686505
met1126	-0.566383	0.432801	245.377	-1.30864	0.19188	1	0.689065
met22132	0.244984	0.233352	214.009	1.04985	0.294972	1	0.689065
met5086	-0.161994	0.132351	214.849	-1.22397	0.222304	1	0.689065
met33364	-0.31898	0.244863	219.469	-1.30269	0.194046	1	0.689065
met43829	-0.257621	0.213143	256.645	-1.20868	0.227899	1	0.689065
met53	0.826049	0.738821	246.593	1.11806	0.264628	1	0.689065
met1101	0.227782	0.209756	243.568	1.08594	0.27858	1	0.689065
met44878	-0.187987	0.179214	227.776	-1.04895	0.295313	1	0.689065
met32452	0.337312	0.204204	238.058	1.65183	0.0998868	1	0.689065
met46225	-0.236732	0.215522	240.024	-1.09841	0.273125	1	0.689065
met22250	0.204222	0.175615	254.558	1.1629	0.24596	1	0.689065
met1604	0.345082	0.262442	259.32	1.31489	0.189709	1	0.689065
met52483	0.237957	0.161335	223.153	1.47493	0.141641	1	0.689065
met46898	0.192945	0.190549	174.529	1.01257	0.312666	1	0.691157
met32397	0.229544	0.239046	226.892	0.960253	0.33795	1	0.709695
met46295	-0.135252	0.146585	243.405	-0.922684	0.357086	1	0.714172
met1564	-0.271172	0.428772	258.723	-0.63244	0.527658	1	0.889722
met36747	-0.140028	0.207605	248.218	-0.674491	0.500627	1	0.889722
met22137	0.157185	0.218206	249.292	0.720353	0.471983	1	0.889722
met42370	-0.187137	0.297284	253.545	-0.629488	0.529596	1	0.889722
met44618	0.0597303	0.185627	245.906	0.321777	0.747895	1	0.910543
met36776	0.143915	0.27547	255.858	0.522433	0.601821	1	0.910543
met1107	-0.0501045	0.214934	245.764	-0.233116	0.815865	1	0.910543
met37202	-0.0182554	0.064462	263.206	-0.283196	0.777249	1	0.910543
met12129	0.0941871	0.310343	256.656	0.303493	0.76176	1	0.910543
met3141	-0.071529	0.392646	244.301	-0.182172	0.855599	1	0.910543
met1572	0.181966	0.646477	240.838	0.281473	0.778589	1	0.910543
met1125	-0.133003	0.341056	265.06	-0.389976	0.696868	1	0.910543
met60	-0.182353	0.409711	264.089	-0.445078	0.656628	1	0.910543
met1302	-0.196446	0.467264	257.847	-0.420417	0.674531	1	0.910543
met1591	0.0807271	0.294303	228.2	0.2743	0.784103	1	0.910543
met1505	-0.0398272	0.284724	260.8	-0.13988	0.888863	1	0.910543
met2125	-0.127092	0.462529	256.713	-0.274777	0.783709	1	0.910543
met27738	-0.0525819	0.354919	186.12	-0.148152	0.882383	1	0.910543
met33140	-0.0247646	0.137573	222.885	-0.18001	0.857308	1	0.910543
met46610	-0.0233101	0.0625866	194.139	-0.372446	0.709967	1	0.910543
met33937	0.0142333	0.205577	241.715	0.069236	0.944859	1	0.944859

## Sheet: CSF-IMM
Supplementary Table S3. Associations between metabolites and cognitive function. Each linear mixed model included a random intercept for the individual and a random slope for age.
The outcome was a cognitive function and metabolite, smoking status, sex, race, education level, practice effect.
COMP.ID	Estimate	Std..Error	df	t.value	Pr...t..	Bon	FDR
met32198	0.62876	0.217153	223.499	2.89548	0.00416134	0.174776	0.174776
met36746	0.344492	0.258256	234.392	1.33392	0.183526	1	0.819406
met32397	0.352704	0.291298	232.923	1.2108	0.227199	1	0.819406
met1126	-0.686341	0.521009	247.526	-1.31733	0.188946	1	0.819406
met5086	-0.192514	0.161362	222.928	-1.19305	0.234116	1	0.819406
met33364	-0.521902	0.298401	251.861	-1.749	0.08151	1	0.819406
met22137	0.325473	0.263954	261.445	1.23307	0.218659	1	0.819406
met1302	-0.745981	0.563778	265.71	-1.32318	0.186912	1	0.819406
met32452	0.446777	0.247695	247.296	1.80374	0.0724891	1	0.819406
met33140	-0.210496	0.165989	228.442	-1.26813	0.206041	1	0.819406
met46898	0.302994	0.235151	193.161	1.28851	0.19911	1	0.819406
met46902	-0.1646	0.0978724	257.921	-1.68179	0.0938208	1	0.819406
met43807	0.197963	0.17314	235.773	1.14336	0.254047	1	0.820766
met48187	0.301779	0.298941	253.838	1.00949	0.3137	1	0.825705
met42370	-0.358235	0.355474	246.483	-1.00777	0.314554	1	0.825705
met1604	0.341292	0.316826	259.664	1.07722	0.28238	1	0.825705
met1107	-0.241675	0.260689	253.554	-0.927063	0.354776	1	0.82781
met46295	-0.171403	0.178244	261.026	-0.961621	0.33713	1	0.82781
met53	0.716039	0.896407	262.541	0.798787	0.425136	1	0.935331
met46225	-0.19887	0.260191	250.337	-0.764321	0.445396	1	0.935331
met44618	0.122079	0.225799	256.184	0.540656	0.589215	1	0.939836
met36776	0.12221	0.331429	257.033	0.368738	0.712627	1	0.939836
met22132	0.142982	0.286588	232.218	0.498912	0.618314	1	0.939836
met33937	-0.0364934	0.249194	255.624	-0.146445	0.883685	1	0.939836
met37202	-0.0410393	0.0776045	263.2	-0.528826	0.597372	1	0.939836
met12129	0.0419868	0.376442	269.069	0.111536	0.911275	1	0.939836
met3141	-0.0881524	0.471048	238.747	-0.187141	0.851709	1	0.939836
met1564	-0.262516	0.517664	258.547	-0.507116	0.612506	1	0.939836
met43829	-0.174041	0.256898	254.722	-0.677472	0.498722	1	0.939836
met1572	0.262726	0.787303	257.939	0.333704	0.738874	1	0.939836
met1101	0.102267	0.255086	254.598	0.400913	0.68882	1	0.939836
met1125	-0.0426464	0.411116	265.444	-0.103733	0.917459	1	0.939836
met60	-0.0887761	0.494479	266.036	-0.179535	0.857654	1	0.939836
met44878	-0.0730208	0.215616	219.452	-0.338661	0.735189	1	0.939836
met1591	0.102647	0.359117	240.193	0.285832	0.775253	1	0.939836
met1505	-0.0372596	0.340789	253.972	-0.109333	0.913024	1	0.939836
met22250	0.0659123	0.212683	261.812	0.309909	0.756877	1	0.939836
met2125	-0.0850147	0.558291	267.413	-0.152277	0.879084	1	0.939836
met27738	0.100331	0.437759	211.391	0.229192	0.818941	1	0.939836
met46610	-0.0364484	0.0765446	202.2	-0.476173	0.634466	1	0.939836
met52483	0.103368	0.197822	236.175	0.522534	0.601789	1	0.939836
met36747	-0.00368341	0.250928	251.775	-0.0146792	0.9883	1	0.9883

## Sheet: CSF_DEL
Supplementary Table S3. Associations between metabolites and cognitive function. Each linear mixed model included a random intercept for the individual and a random slope for age.
The outcome was a cognitive function and metabolite, smoking status, sex, race, education level, practice effect.
COMP.ID	Estimate	Std..Error	df	t.value	Pr...t..	Bon	FDR
met32198	0.474693	0.203911	219.791	2.32794	0.0208242	0.874616	0.640907
met48187	0.60167	0.276549	250.085	2.17563	0.0305194	1	0.640907
met33364	-0.501316	0.280301	251.846	-1.78849	0.0748988	1	0.702643
met32452	0.405551	0.232586	242.98	1.74367	0.0824822	1	0.702643
met1604	0.513978	0.297681	264.247	1.72661	0.0854067	1	0.702643
met46898	0.362445	0.219548	194.571	1.65087	0.100378	1	0.702643
met1101	0.372374	0.238685	254.362	1.56011	0.119977	1	0.719864
met36746	0.270808	0.243938	239.815	1.11015	0.268046	1	0.750528
met44618	0.288461	0.210545	251.512	1.37007	0.171887	1	0.750528
met36776	0.346714	0.307241	242.788	1.12847	0.260234	1	0.750528
met22132	0.300682	0.268626	233.296	1.11933	0.264149	1	0.750528
met43807	0.20944	0.159718	227.566	1.31132	0.191073	1	0.750528
met43829	-0.286161	0.241178	255.443	-1.18651	0.236522	1	0.750528
met1591	0.37232	0.334757	237.286	1.11221	0.267173	1	0.750528
met22250	0.273988	0.197516	256.778	1.38716	0.166595	1	0.750528
met36747	-0.236813	0.235361	253.428	-1.00617	0.315294	1	0.778963
met46902	-0.0945186	0.0921199	253.604	-1.02604	0.305851	1	0.778963
met27738	0.393734	0.408672	211.057	0.963448	0.336425	1	0.784992
met1302	-0.491462	0.533882	268.541	-0.920545	0.358114	1	0.791621
met32397	0.198041	0.276686	235.058	0.715758	0.474851	1	0.943462
met1126	-0.15378	0.489943	247.691	-0.313874	0.753881	1	0.943462
met1107	0.0503408	0.24603	251.855	0.204612	0.83804	1	0.943462
met33937	0.0679247	0.234668	258.367	0.28945	0.772469	1	0.943462
met37202	-0.021307	0.0728409	264.098	-0.292515	0.770123	1	0.943462
met1564	-0.0960909	0.487651	260.542	-0.197049	0.843943	1	0.943462
met5086	-0.0778144	0.151994	224.299	-0.511957	0.609185	1	0.943462
met53	0.156342	0.84647	261.693	0.184699	0.853608	1	0.943462
met1572	0.561146	0.740984	259.113	0.757299	0.449559	1	0.943462
met22137	0.0648914	0.249127	259.623	0.260476	0.794703	1	0.943462
met1125	0.22619	0.386239	266.773	0.585621	0.558625	1	0.943462
met60	-0.0880006	0.464585	265.692	-0.189418	0.84991	1	0.943462
met1505	0.187005	0.320894	255.042	0.582762	0.560568	1	0.943462
met46225	0.091812	0.247383	261.632	0.371134	0.710838	1	0.943462
met42370	-0.0917898	0.338173	257.699	-0.271429	0.786279	1	0.943462
met33140	-0.0620832	0.15578	230.22	-0.398531	0.690608	1	0.943462
met46610	0.0203664	0.0717268	201.028	0.283944	0.776745	1	0.943462
met46295	-0.0588971	0.16657	254.928	-0.353589	0.723939	1	0.943462
met52483	0.0980637	0.184642	236.674	0.531102	0.595846	1	0.943462
met12129	-0.0429302	0.353099	263.876	-0.121581	0.903323	1	0.948489
met2125	0.066671	0.523787	263.914	0.127286	0.898811	1	0.948489
met3141	-0.040222	0.441748	233.392	-0.0910518	0.927529	1	0.950152
met44878	-0.00278562	0.207292	234.861	-0.0134381	0.98929	1	0.98929

## Sheet: CSF-EXE
Supplementary Table S3. Associations between metabolites and cognitive function. Each linear mixed model included a random intercept for the individual and a random slope for age.
The outcome was a cognitive function and metabolite, smoking status, sex, race, education level, practice effect.
COMP.ID	Estimate	Std..Error	df	t.value	Pr...t..	Bon	FDR
met36746	0.532031	0.184158	216.826	2.889	0.00425686	0.178788	0.0993618
met22132	0.580273	0.203272	214.162	2.85467	0.00473151	0.198724	0.0993618
met53	1.60356	0.656099	249.627	2.44408	0.0152152	0.63904	0.213013
met46295	-0.299447	0.128301	245.955	-2.33395	0.0204046	0.856994	0.214248
met52483	0.301172	0.140212	214.939	2.14797	0.0328349	1	0.275813
met33937	0.321804	0.183152	258.88	1.75703	0.0800945	1	0.529549
met43829	0.3218	0.190423	265.098	1.68992	0.0922186	1	0.529549
met32452	0.297463	0.180582	231.281	1.64724	0.100867	1	0.529549
met43807	0.197062	0.127258	237.29	1.54852	0.122829	1	0.573201
met46902	-0.103139	0.0706399	241.329	-1.46006	0.145574	1	0.611409
met36776	0.279868	0.242799	250.576	1.15267	0.250143	1	0.808153
met32198	0.196736	0.157928	203.246	1.24574	0.214295	1	0.808153
met1604	0.272669	0.234274	260.341	1.16389	0.245534	1	0.808153
met3141	0.383551	0.347927	243.682	1.10239	0.271379	1	0.814138
met5086	0.119976	0.115996	205.123	1.03431	0.302208	1	0.846182
met44618	-0.059982	0.162642	235.386	-0.368798	0.712609	1	0.910749
met37202	0.0350346	0.0573321	261.872	0.61108	0.541676	1	0.910749
met12129	0.252343	0.275396	257.046	0.916291	0.360373	1	0.910749
met36747	0.100691	0.1836	242.389	0.548427	0.583904	1	0.910749
met33364	-0.0749207	0.218843	237.719	-0.34235	0.73239	1	0.910749
met1572	-0.192731	0.573864	245.846	-0.335847	0.737273	1	0.910749
met22137	0.155259	0.195149	255.944	0.795589	0.427008	1	0.910749
met1101	0.0950515	0.185072	238.682	0.513592	0.608012	1	0.910749
met1125	0.137657	0.303816	265.901	0.453095	0.65085	1	0.910749
met60	0.139478	0.365193	266.184	0.38193	0.702818	1	0.910749
met1302	0.26358	0.41773	260.951	0.630981	0.528605	1	0.910749
met44878	-0.0647952	0.16126	235.665	-0.401807	0.68819	1	0.910749
met48187	0.146992	0.217622	238.874	0.675447	0.500045	1	0.910749
met22250	0.0928816	0.155517	251.413	0.597244	0.550882	1	0.910749
met42370	0.137378	0.267522	264.22	0.51352	0.608017	1	0.910749
met2125	0.319522	0.408584	259.178	0.782022	0.434915	1	0.910749
met27738	0.182397	0.310088	192.208	0.588211	0.557081	1	0.910749
met33140	0.0662704	0.121584	226.593	0.545058	0.58625	1	0.910749
met46898	0.0765401	0.166552	177.598	0.459558	0.646396	1	0.910749
met32397	0.0163023	0.213042	221.301	0.0765218	0.939073	1	0.992557
met1126	-0.00603895	0.389423	266.218	-0.0155074	0.987639	1	0.992557
met1107	0.0101466	0.191065	240.48	0.0531058	0.957692	1	0.992557
met1564	0.003558	0.381013	253.391	0.00933826	0.992557	1	0.992557
met1591	-0.04956	0.256966	220.837	-0.192866	0.847241	1	0.992557
met1505	-0.040782	0.253767	265.347	-0.160707	0.872447	1	0.992557
met46225	-0.028006	0.195324	268.475	-0.143382	0.886096	1	0.992557
met46610	0.0056398	0.0550391	188.985	0.102469	0.918493	1	0.992557

## Sheet: Plasma-PACC3
Supplementary Table S3. Associations between metabolites and cognitive function. Each linear mixed model included a random intercept for family and individual and a random slope for age.
The outcome was a cognitive function and metabolite, smoking status, sex, race, education level, practice effect.
COMP.ID	Estimate	Std..Error	df	t.value	Pr...t..	Bon	FDR
met53013	0.456446	0.114189	1687.4	3.99729	6.68336e-05	0.0421052	0.0210526
met32377	-0.427446	0.106552	1520.59	-4.01162	6.32327e-05	0.0398366	0.0210526
met37207	0.129631	0.0356533	1812.54	3.63588	0.000284768	0.179404	0.0598014
met48989	-0.0618056	0.0176812	1365.4	-3.49556	0.000488222	0.30758	0.076895
met44878	-0.298953	0.0898342	1832.24	-3.32783	0.000892566	0.562317	0.112463
met46690	0.0927817	0.0283906	1571.68	3.26805	0.0011063	0.696971	0.116162
met48885	-0.391205	0.127547	1709.58	-3.06715	0.00219501	1	0.197551
met52452	0.504011	0.210901	1570.33	2.3898	0.0169748	1	0.482427
met33961	0.367568	0.156561	1599.39	2.34776	0.019008	1	0.482427
met37187	0.0480434	0.0193604	1617.14	2.48153	0.013183	1	0.482427
met22132	0.20676	0.0878531	1454.95	2.35348	0.0187313	1	0.482427
met57516	0.262353	0.100337	1796.8	2.61472	0.00900474	1	0.482427
met44872	0.266643	0.11107	1341.05	2.40068	0.0165003	1	0.482427
met37506	0.649039	0.247481	1740.76	2.62258	0.00880292	1	0.482427
met52633	0.0741594	0.0279745	1538.14	2.65096	0.0081087	1	0.482427
met1648	0.407224	0.171626	1786.18	2.37273	0.0177624	1	0.482427
met57483	0.280247	0.110068	1831.7	2.54612	0.010974	1	0.482427
met34409	0.238327	0.100929	1622.44	2.36134	0.0183265	1	0.482427
met15336	0.0187336	0.00765176	1216.96	2.44828	0.0144945	1	0.482427
met46986	0.047367	0.0192555	1429.2	2.45993	0.0140142	1	0.482427
met46640	0.151644	0.0610815	1691.04	2.48266	0.0131369	1	0.482427
met47800	0.211057	0.0858513	1500.92	2.4584	0.0140679	1	0.482427
met47824	-0.0400337	0.0158889	1165.07	-2.51961	0.0118815	1	0.482427
met46695	-0.138178	0.0519345	1360.67	-2.66062	0.00789129	1	0.482427
met52286	0.0931073	0.0396945	1320.01	2.3456	0.0191439	1	0.482427
met54	0.412571	0.178931	1459.73	2.30575	0.0212641	1	0.515245
met46260	-0.308669	0.135244	1714.06	-2.28231	0.0225929	1	0.527168
met47773	0.0376344	0.016763	1550.26	2.24508	0.0249036	1	0.56033
met52623	0.180876	0.0824382	1560.32	2.19409	0.0283762	1	0.607316
met52434	0.341419	0.156157	1752.09	2.18638	0.0289198	1	0.607316
met43343	-0.112077	0.0529446	1511.67	-2.11687	0.0344337	1	0.64518
met38637	0.0250223	0.0118464	1622.99	2.11223	0.0348193	1	0.64518
met61873	-0.0210659	0.00997057	1357.6	-2.11281	0.034799	1	0.64518
met46588	0.090754	0.04283	1764.11	2.11893	0.0342356	1	0.64518
met42446	0.49494	0.23658	1566.49	2.09207	0.0365933	1	0.655581
met1549	0.138828	0.067733	1417.8	2.04964	0.0405836	1	0.655581
met62060	-0.360282	0.175306	1783.12	-2.05516	0.0400091	1	0.655581
met62059	-0.117851	0.0569748	1536.28	-2.06847	0.0387631	1	0.655581
met1516	-0.24561	0.118177	1189.32	-2.07832	0.0378935	1	0.655581
met57635	0.140739	0.0702164	1743.03	2.00435	0.0451865	1	0.6733
met5086	-0.231398	0.115965	1848.74	-1.9954	0.0461456	1	0.6733
met57807	0.0419784	0.0211178	1416.7	1.98782	0.0470241	1	0.6733
met48460	0.0132456	0.00658431	1395.12	2.0117	0.0444441	1	0.6733
met37058	-0.242709	0.121588	1804.54	-1.99615	0.0460671	1	0.6733
met63	0.26459	0.134098	1622.1	1.97311	0.0486528	1	0.68114
met60	0.437571	0.222876	1630.62	1.9633	0.0497816	1	0.681791
met52602	0.119406	0.0623765	1203.88	1.91428	0.0558211	1	0.690523
met36098	-0.0495884	0.0258122	1341.23	-1.92112	0.0549283	1	0.690523
met15122	-0.126281	0.0657451	1297.2	-1.92076	0.0549804	1	0.690523
met42087	-0.0503638	0.0264431	1738.33	-1.90461	0.0569955	1	0.690523
met37432	-0.10855	0.0568452	1181.57	-1.90958	0.0564297	1	0.690523
met46911	0.0258075	0.0135054	1542.78	1.91091	0.0562012	1	0.690523
met54873	-0.0402671	0.0212839	1482.12	-1.8919	0.0586987	1	0.697739
met43582	-0.14422	0.0777775	1358.19	-1.85426	0.0639185	1	0.700284
met47120	-0.0744463	0.0416443	1357.71	-1.78767	0.0740525	1	0.700284
met57528	0.055379	0.0308398	1626.98	1.7957	0.0727284	1	0.700284
met1107	-0.29092	0.162669	1334.38	-1.78841	0.073936	1	0.700284
met12129	0.174164	0.0963514	1524.85	1.80759	0.0708666	1	0.700284
met57636	0.114148	0.0611115	1654.81	1.86786	0.0619584	1	0.700284
met57520	0.11481	0.0627067	1437.34	1.8309	0.0673218	1	0.700284
met40730	-0.0774688	0.0428925	1578.33	-1.80611	0.0710912	1	0.700284
met37059	-0.0481187	0.0268805	1379.49	-1.7901	0.0736579	1	0.700284
met45404	0.0116478	0.00651434	1257.06	1.78803	0.0740118	1	0.700284
met44877	0.232496	0.126026	1510.33	1.84482	0.0652592	1	0.700284
met46225	-0.130324	0.0730219	1795.65	-1.78473	0.0744746	1	0.700284
met42459	0.356978	0.199436	1788	1.78994	0.0736335	1	0.700284
met46493	0.0925489	0.0508592	1735.85	1.81971	0.0689757	1	0.700284
met57547	-0.0373347	0.0217487	1426.97	-1.71664	0.0862623	1	0.702962
met44526	0.267905	0.156457	1574.41	1.71233	0.0870334	1	0.702962
met1561	0.201713	0.117176	1533.11	1.72145	0.0853713	1	0.702962
met57513	0.114274	0.0653225	1568.19	1.74937	0.0804222	1	0.702962
met1505	-0.160333	0.0923306	1765.74	-1.73652	0.0826471	1	0.702962
met35172	-0.119877	0.0697626	1654.93	-1.71836	0.0859189	1	0.702962
met42463	0.307674	0.17478	1809.69	1.76035	0.0785166	1	0.702962
met1649	0.302072	0.173049	1538.43	1.74559	0.0810822	1	0.702962
met33140	0.0864552	0.0492725	1572.39	1.75463	0.0795169	1	0.702962
met46607	0.0253582	0.0147349	1498.68	1.72097	0.085463	1	0.702962
met48047	-0.0521845	0.0299374	1416.23	-1.74312	0.0815293	1	0.702962
met52682	0.203124	0.119339	1806.93	1.70207	0.0889137	1	0.709058
met52470	-0.122142	0.0748887	1670.48	-1.63098	0.103082	1	0.739692
met52449	0.16257	0.103522	1639.12	1.57039	0.116518	1	0.739692
met54805	-0.135664	0.0888556	1600.83	-1.52679	0.127012	1	0.739692
met22116	0.216045	0.139788	1631.99	1.54552	0.122414	1	0.739692
met35114	-0.288099	0.180928	1723.03	-1.59234	0.111492	1	0.739692
met46173	-0.241021	0.157068	1633.31	-1.53451	0.125099	1	0.739692
met15500	0.295164	0.182338	1682.04	1.61877	0.105683	1	0.739692
met18349	0.15175	0.0977569	1626.28	1.55232	0.120779	1	0.739692
met33441	0.102239	0.062343	1700.2	1.63994	0.101202	1	0.739692
met1125	0.334238	0.203614	1591.66	1.64153	0.100885	1	0.739692
met37252	-0.0312721	0.0202646	1820.78	-1.54319	0.122958	1	0.739692
met61865	-0.0806876	0.0531461	1629.78	-1.51822	0.129153	1	0.739692
met32452	0.175602	0.104897	1656.04	1.67404	0.0943111	1	0.739692
met43378	0.0720636	0.0444151	1312.94	1.6225	0.104936	1	0.739692
met37529	0.248692	0.153542	1726.4	1.6197	0.105478	1	0.739692
met57475	0.190554	0.125466	1806.15	1.51877	0.128995	1	0.739692
met47154	0.166527	0.103365	1695.29	1.61105	0.107355	1	0.739692
met46960	-0.279537	0.181273	1712.39	-1.54208	0.123239	1	0.739692
met61836	-0.0450881	0.0286517	1703.52	-1.57366	0.115752	1	0.739692
met61848	-0.0476522	0.0292216	1604.43	-1.63072	0.103146	1	0.739692
met2761	0.235384	0.147871	1768.44	1.59182	0.111604	1	0.739692
met52436	0.210816	0.132129	1592.8	1.59554	0.110791	1	0.739692
met46590	-0.0316835	0.020671	1305.69	-1.53275	0.12558	1	0.739692
met46360	0.0617633	0.0380496	1849.07	1.62323	0.10471	1	0.739692
met47439	-0.0320796	0.0208224	1424.1	-1.54063	0.123629	1	0.739692
met46738	0.159243	0.104103	1594.12	1.52967	0.126296	1	0.739692
met46261	0.0616528	0.0404785	1338.14	1.5231	0.127969	1	0.739692
met46295	0.0849044	0.0534984	1691.72	1.58705	0.112689	1	0.739692
met46516	-0.0594025	0.03575	1541.89	-1.66161	0.0967944	1	0.739692
met47016	0.0250711	0.0161365	1534.23	1.55369	0.120465	1	0.739692
met54704	-0.202373	0.126045	1652.87	-1.60557	0.10856	1	0.739692
met57747	-0.117152	0.0784414	1817.68	-1.4935	0.13548	1	0.751334
met15990	0.126248	0.0847813	1394.02	1.48911	0.136686	1	0.751334
met52615	0.213811	0.143592	1738.47	1.48901	0.136665	1	0.751334
met19503	0.221396	0.148283	1642.19	1.49307	0.135612	1	0.751334
met46443	0.0584535	0.039306	1848.77	1.48714	0.137148	1	0.751334
met31912	0.0327827	0.0221954	1472.33	1.47701	0.139888	1	0.753241
met54837	-0.0413351	0.027959	1487.39	-1.47842	0.139507	1	0.753241
met52438	-0.150087	0.102039	1378.72	-1.47089	0.141549	1	0.755729
met52468	0.130426	0.0906149	1713.86	1.43934	0.150236	1	0.757192
met38125	0.0372425	0.0255955	1331.58	1.45504	0.145893	1	0.757192
met37459	0.088039	0.0608701	1852.61	1.44634	0.148251	1	0.757192
met64	0.381205	0.264785	1614.71	1.43968	0.150152	1	0.757192
met46517	0.0779263	0.0534291	1778.96	1.4585	0.14488	1	0.757192
met48009	-0.0801227	0.0547125	1500.76	-1.46443	0.143285	1	0.757192
met52483	0.116857	0.0808203	1575.54	1.44588	0.148409	1	0.757192
met33971	-0.077062	0.0545861	1378.99	-1.41175	0.158249	1	0.760468
met32197	0.143028	0.101748	1695.67	1.40571	0.159994	1	0.760468
met37209	0.071229	0.0504338	1652.6	1.41233	0.158042	1	0.760468
met33447	-0.0667281	0.0474426	1420.42	-1.4065	0.159794	1	0.760468
met43239	0.0105931	0.00746228	1182.44	1.41955	0.156002	1	0.760468
met52433	0.212735	0.150838	1843.06	1.41035	0.158604	1	0.760468
met46473	-0.0948652	0.0665411	1674.74	-1.42566	0.154152	1	0.760468
met46666	0.0217332	0.0155384	1504.87	1.39867	0.162118	1	0.760468
met46490	-0.0292035	0.0209205	1405.46	-1.39593	0.162958	1	0.760468
met52769	-0.140608	0.100457	1651.68	-1.39968	0.161797	1	0.760468
met47651	-0.0408531	0.0295312	1815.27	-1.38339	0.166717	1	0.772291
met32418	-0.0736668	0.0534567	1499.46	-1.37806	0.168389	1	0.774344
met52465	-0.0858988	0.0626031	1821.55	-1.37212	0.170196	1	0.776983
met15676	0.193765	0.142623	1667.26	1.35858	0.174462	1	0.78182
met513	-0.329994	0.243896	1825.99	-1.35301	0.17622	1	0.78182
met61862	-0.0581949	0.0429017	1422.76	-1.35647	0.175165	1	0.78182
met46665	0.0649161	0.0478844	1530.02	1.35568	0.1754	1	0.78182
met52431	0.0316962	0.0235923	1365.55	1.3435	0.179333	1	0.784583
met46902	0.0405494	0.0301348	1553.22	1.3456	0.178628	1	0.784583
met57652	-0.0727803	0.0544033	1382.37	-1.33779	0.181184	1	0.787214
met57480	0.174745	0.131192	1839.81	1.33198	0.183033	1	0.789799
met46223	0.14189	0.10728	1678.56	1.32261	0.186144	1	0.797759
met61868	-0.115299	0.091222	1822.21	-1.26394	0.206414	1	0.798407
met43761	-0.0725524	0.0566648	1374.52	-1.28038	0.200628	1	0.798407
met46548	-0.0639666	0.0510399	1835.92	-1.25327	0.210268	1	0.798407
met15685	0.0604807	0.0484464	1714.18	1.24841	0.212053	1	0.798407
met36776	-0.133622	0.108062	1609.01	-1.23653	0.216444	1	0.798407
met62103	-0.12274	0.0981057	1139.35	-1.2511	0.211153	1	0.798407
met57521	0.120463	0.0923378	1815.84	1.30459	0.192197	1	0.798407
met40481	-0.00727822	0.00601049	1272.62	-1.21092	0.226151	1	0.798407
met39837	-0.070684	0.0536561	1276.43	-1.31735	0.187957	1	0.798407
met44876	0.060135	0.0494604	1522.84	1.21582	0.224241	1	0.798407
met18369	0.130081	0.107145	1283.81	1.21407	0.224946	1	0.798407
met57421	0.132882	0.106357	1831.55	1.24939	0.211681	1	0.798407
met43802	-0.15262	0.119442	1769.01	-1.27778	0.201494	1	0.798407
met57511	0.105543	0.0869916	1578.4	1.21325	0.225215	1	0.798407
met48757	0.0314198	0.025504	1630.25	1.23196	0.218144	1	0.798407
met37496	-0.162878	0.131722	1817.68	-1.23653	0.216421	1	0.798407
met48351	-0.119033	0.0907127	1663.84	-1.3122	0.189634	1	0.798407
met42109	-0.133306	0.107825	1241.9	-1.23632	0.216574	1	0.798407
met40703	-0.0376373	0.0292804	1306.05	-1.28541	0.198878	1	0.798407
met62152	0.101347	0.0773558	1526.32	1.31014	0.190345	1	0.798407
met57473	0.0934864	0.0745491	1659.68	1.25402	0.21001	1	0.798407
met48408	-0.0258961	0.0207184	1346.58	-1.24991	0.21155	1	0.798407
met57517	0.132727	0.103763	1786.78	1.27914	0.201015	1	0.798407
met46460	-0.0761829	0.0628203	1573.8	-1.21271	0.225422	1	0.798407
met46914	0.0741504	0.0570014	1640.19	1.30085	0.193492	1	0.798407
met46603	0.0719654	0.057002	1663.28	1.26251	0.206943	1	0.798407
met47988	-0.0324975	0.0263408	1407.14	-1.23373	0.217509	1	0.798407
met46681	0.0457852	0.0366786	1809.38	1.24828	0.21209	1	0.798407
met46709	0.0351867	0.0283894	1636.15	1.23943	0.215363	1	0.798407
met52871	-0.0223451	0.0184231	1378.06	-1.21288	0.225383	1	0.798407
met52881	-0.0221111	0.0182878	1365.62	-1.20906	0.226849	1	0.798407
met53114	-0.0730957	0.0567834	1327.14	-1.28727	0.198224	1	0.798407
met12017	-0.105684	0.0886419	1369.87	-1.19225	0.233369	1	0.805051
met48429	0.0165698	0.0138262	1518.67	1.19843	0.230937	1	0.805051
met46634	0.0538478	0.0451487	1634.39	1.19268	0.233169	1	0.805051
met53266	0.0196265	0.0164791	1491.84	1.19099	0.233848	1	0.805051
met33969	-0.0537467	0.0454871	1504.76	-1.18158	0.237559	1	0.80901
met46710	0.0182092	0.0154102	1306.77	1.18163	0.237566	1	0.80901
met15716	0.128702	0.109394	1807.79	1.1765	0.239549	1	0.811377
met19258	-0.0663893	0.05703	1459.37	-1.16411	0.244568	1	0.819564
met57453	0.114255	0.0980193	1824.84	1.16564	0.243914	1	0.819564
met52916	-0.0346039	0.0298192	1694.63	-1.16046	0.246026	1	0.820085
met52710	0.12977	0.11339	1390.68	1.14446	0.252628	1	0.827688
met57417	0.0343455	0.0299006	1548.94	1.14866	0.250874	1	0.827688
met46595	-0.032702	0.0286305	1410.92	-1.14221	0.253562	1	0.827688
met49536	-0.0343392	0.0299801	1492.53	-1.1454	0.252227	1	0.827688
met52467	0.0669022	0.0596599	1448.58	1.12139	0.262306	1	0.830118
met62064	-0.0459795	0.0406262	1572.91	-1.13177	0.257904	1	0.830118
met1642	-0.0791342	0.0697244	1490.84	-1.13496	0.256576	1	0.830118
met52977	-0.0216672	0.0191599	1693.66	-1.13086	0.258274	1	0.830118
met54968	0.0467543	0.0417288	1414.27	1.12043	0.26272	1	0.830118
met38170	0.0373464	0.0333637	1837.19	1.11937	0.263127	1	0.830118
met54977	0.164228	0.146838	1819.48	1.11843	0.26353	1	0.830118
met52748	0.101207	0.0915104	1593.06	1.10596	0.268911	1	0.842032
met38296	-0.0866059	0.07848	1378.93	-1.10354	0.269985	1	0.842032
met43400	0.0358783	0.032746	1492.25	1.09565	0.273407	1	0.842223
met1558	-0.0712652	0.0651448	1426.37	-1.09395	0.274162	1	0.842223
met33587	-0.0626411	0.0570963	1331.85	-1.09711	0.27279	1	0.842223
met57595	0.122949	0.112688	1797.26	1.09106	0.275394	1	0.842223
met57745	0.0269074	0.0247904	1536.14	1.0854	0.277917	1	0.845833
met31591	0.0410655	0.037949	1736.43	1.08212	0.279347	1	0.8461
met1365	-0.0685953	0.0637267	1383.7	-1.0764	0.281937	1	0.849857
met57564	-0.0623503	0.0583926	1543.4	-1.06778	0.285788	1	0.853887
met47739	-0.0227611	0.0213247	1478.93	-1.06736	0.285984	1	0.853887
met57814	0.0414098	0.0405703	1378.8	1.02069	0.30758	1	0.858859
met27447	0.046246	0.0475505	1236.87	0.972566	0.330959	1	0.858859
met53195	-0.0677384	0.0669183	1616.74	-1.01226	0.311567	1	0.858859
met35628	-0.0779388	0.0756532	1419.53	-1.03021	0.303086	1	0.858859
met52610	0.12681	0.129676	1813.51	0.977902	0.328253	1	0.858859
met52461	-0.178097	0.171811	1562.2	-1.03659	0.300088	1	0.858859
met35305	0.0297222	0.0304979	1345.09	0.974564	0.329952	1	0.858859
met3155	0.051261	0.0519959	1713.69	0.985868	0.324337	1	0.858859
met37475	0.00551996	0.00535594	1318.66	1.03063	0.302906	1	0.858859
met33968	-0.0542136	0.0533625	1521.54	-1.01595	0.309815	1	0.858859
met57331	0.0772746	0.0783752	1692.48	0.985958	0.324294	1	0.858859
met43807	0.0987786	0.100244	1779.46	0.985376	0.324573	1	0.858859
met1563	-0.0185062	0.0190832	1428.57	-0.969764	0.332328	1	0.858859
met1564	0.220415	0.227072	1557.39	0.970684	0.331856	1	0.858859
met38669	0.0125656	0.0119319	1591.56	1.05311	0.292451	1	0.858859
met32415	-0.0680745	0.0676692	1354.44	-1.00599	0.3146	1	0.858859
met53263	0.0299724	0.0295328	1465.43	1.01488	0.310328	1	0.858859
met32504	-0.0528478	0.0541996	1545.49	-0.975058	0.329684	1	0.858859
met33973	0.0410706	0.0391635	1656.87	1.04869	0.294472	1	0.858859
met33950	-0.0746816	0.0705248	1727.14	-1.05894	0.289775	1	0.858859
met33959	0.0601481	0.0608325	1578.84	0.988749	0.322938	1	0.858859
met35157	-0.0957866	0.0938268	1334.08	-1.02089	0.307493	1	0.858859
met1898	0.139297	0.133677	1719.52	1.04204	0.297538	1	0.858859
met18335	0.0174016	0.0174203	1820.52	0.998927	0.317963	1	0.858859
met1806	-0.145102	0.14431	1811.33	-1.00549	0.314795	1	0.858859
met15679	0.0302026	0.0309486	1527.34	0.975895	0.329271	1	0.858859
met47901	0.0184286	0.0180442	1368.99	1.0213	0.307292	1	0.858859
met46633	-0.0738452	0.0720332	1584.37	-1.02515	0.305447	1	0.858859
met48772	0.019338	0.0199549	1743.23	0.969084	0.332638	1	0.858859
met46294	-0.0187091	0.0192435	1704.62	-0.97223	0.331074	1	0.858859
met52135	0.077801	0.0743199	1324.57	1.04684	0.295365	1	0.858859
met52524	0.0494795	0.0472473	1737.39	1.04724	0.295132	1	0.858859
met57714	0.0317979	0.03057	1833.5	1.04017	0.298399	1	0.858859
met1361	-0.0900077	0.0933714	1348.81	-0.963975	0.335231	1	0.862023
met48255	-0.0969144	0.101091	1619.04	-0.958688	0.337859	1	0.864597
met1302	0.155441	0.162507	1373.76	0.956522	0.338977	1	0.864597
met32390	0.0308873	0.0324061	1404.55	0.953131	0.340688	1	0.865457
met61843	0.0400777	0.0431976	1273.49	0.927776	0.3537	1	0.867397
met53223	-0.0722642	0.0769522	1626.77	-0.93908	0.347829	1	0.867397
met32619	0.0537337	0.0567025	1835.14	0.947643	0.343436	1	0.867397
met48491	0.151663	0.162495	1819.59	0.933344	0.350766	1	0.867397
met57691	-0.0205754	0.0218022	1831.25	-0.943732	0.345431	1	0.867397
met47977	0.0185142	0.01996	1691.19	0.927564	0.353766	1	0.867397
met49637	-0.0930498	0.0994496	1374.81	-0.935648	0.349619	1	0.867397
met52788	-0.216293	0.231063	1712.38	-0.936081	0.349364	1	0.867397
met54877	0.0520544	0.0561275	1604.08	0.92743	0.353843	1	0.867397
met49617	0.0817613	0.0885552	1593.23	0.923281	0.356001	1	0.868025
met35159	0.0355232	0.0385437	1648.25	0.921633	0.356855	1	0.868025
met2137	0.067173	0.0735614	1737.92	0.913155	0.361288	1	0.87208
met47153	0.107287	0.11748	1261.63	0.913241	0.36129	1	0.87208
met52690	0.0263647	0.0291433	1505.05	0.904657	0.365792	1	0.878025
met38178	0.060936	0.067466	1720.89	0.903211	0.36654	1	0.878025
met1494	0.165058	0.185691	1744.42	0.888883	0.374188	1	0.881023
met48492	0.122959	0.139498	1340.86	0.881442	0.378236	1	0.881023
met1417	0.0811984	0.0905866	1705.29	0.896362	0.370186	1	0.881023
met57365	0.0957676	0.108082	1617.23	0.886063	0.375715	1	0.881023
met47687	-0.134144	0.152437	1777.78	-0.879998	0.37898	1	0.881023
met52544	0.0195803	0.0219363	1775.38	0.892597	0.372194	1	0.881023
met52790	0.0200128	0.0226142	1379.02	0.884966	0.376329	1	0.881023
met57756	0.0158203	0.0177755	1413.79	0.890001	0.373617	1	0.881023
met52611	0.0854258	0.0978357	1841.41	0.873156	0.382692	1	0.883135
met57518	0.0728508	0.0832699	1787.34	0.874875	0.381759	1	0.883135
met57481	0.0747832	0.0862701	1620.52	0.866849	0.386153	1	0.88787
met3141	0.131686	0.152784	1661.64	0.861912	0.38886	1	0.890481
met52647	0.0260272	0.0302776	1778.56	0.859618	0.390116	1	0.890481
met53209	-0.0225879	0.0264431	1781.56	-0.854208	0.393105	1	0.890515
met33972	-0.0454834	0.0556866	1297.04	-0.816775	0.414207	1	0.890515
met48442	-0.00562541	0.00658611	1270.34	-0.854132	0.393193	1	0.890515
met37186	0.0202929	0.0244002	1836.96	0.83167	0.405703	1	0.890515
met48569	-0.00518167	0.00610413	1349.07	-0.848879	0.396099	1	0.890515
met1638	0.132356	0.16364	1747.19	0.808823	0.418727	1	0.890515
met32489	-0.0531296	0.0638174	1262.27	-0.832526	0.40527	1	0.890515
met43493	0.0311953	0.0378723	1481.13	0.823696	0.410245	1	0.890515
met36738	0.0463964	0.0576321	1300.71	0.805045	0.420941	1	0.890515
met396	-0.0250509	0.0315554	1529.67	-0.793869	0.427395	1	0.890515
met44664	-0.0688821	0.0845602	1830.94	-0.814592	0.415412	1	0.890515
met52974	-0.0160707	0.0194524	1371.68	-0.826152	0.408862	1	0.890515
met27513	-0.0539808	0.0636083	1586.46	-0.848643	0.396208	1	0.890515
met57330	0.101179	0.125767	1634.01	0.804494	0.421229	1	0.890515
met57463	0.0348048	0.0419984	1409.32	0.828717	0.407405	1	0.890515
met1303	-0.12775	0.157115	1716.23	-0.813095	0.416276	1	0.890515
met44681	0.0999921	0.118569	1639.14	0.843323	0.399171	1	0.890515
met20693	0.0385772	0.0483048	1651.59	0.798621	0.424625	1	0.890515
met1670	-0.0996488	0.119203	1569.49	-0.835959	0.403305	1	0.890515
met46608	0.0578186	0.072105	1814.36	0.801866	0.422736	1	0.890515
met46997	0.024835	0.0312551	1558.78	0.79459	0.426973	1	0.890515
met46643	-0.039234	0.0495174	1495.53	-0.792328	0.428295	1	0.890515
met46645	0.0157657	0.0191323	1260.94	0.824039	0.410073	1	0.890515
met46632	-0.0628313	0.079275	1665.59	-0.792574	0.428139	1	0.890515
met47787	-0.0245137	0.0301674	1386.54	-0.812588	0.416594	1	0.890515
met52525	-0.0319977	0.0383636	1426.19	-0.834064	0.404384	1	0.890515
met52865	0.0269385	0.033497	1717.33	0.804206	0.421389	1	0.890515
met33161	0.00618721	0.00792464	1368.28	0.780756	0.435081	1	0.894492
met39598	0.00601917	0.00783975	1427.6	0.767775	0.442748	1	0.894492
met27718	0.0669331	0.0867823	1840.16	0.771276	0.440642	1	0.894492
met1645	-0.0484245	0.0633021	1501.41	-0.764975	0.444406	1	0.894492
met27731	-0.0719314	0.0917225	1396.71	-0.784229	0.433039	1	0.894492
met48493	0.150644	0.194003	1696.24	0.776502	0.437561	1	0.894492
met57482	0.0880929	0.113831	1756.6	0.773894	0.439098	1	0.894492
met53231	-0.0887386	0.114852	1638.89	-0.772635	0.43985	1	0.894492
met46968	-0.0300791	0.038751	1831.8	-0.776215	0.437722	1	0.894492
met47783	0.0230814	0.0301619	1678.34	0.76525	0.44423	1	0.894492
met34397	0.0182026	0.0247059	1345.75	0.736774	0.461388	1	0.895923
met39609	-0.0575978	0.0783158	1428.32	-0.735456	0.462182	1	0.895923
met48580	-0.00445769	0.00605129	1321.92	-0.736652	0.461465	1	0.895923
met45721	0.00571014	0.00758099	1393.02	0.753218	0.451446	1	0.895923
met32198	0.074891	0.100799	1418.09	0.74297	0.457623	1	0.895923
met37063	-0.0337513	0.0451764	1215.41	-0.747099	0.455148	1	0.895923
met57	0.053965	0.0726545	1627.32	0.742762	0.457733	1	0.895923
met1336	-0.0731135	0.0963597	1348.53	-0.758756	0.448131	1	0.895923
met12261	0.0143589	0.019288	1549.82	0.744449	0.456718	1	0.895923
met18392	0.0159049	0.02146	1422.12	0.741143	0.458729	1	0.895923
met36095	0.00816844	0.0110074	1320.23	0.742084	0.458169	1	0.895923
met46599	-0.0329724	0.0437999	1774.67	-0.752797	0.451672	1	0.895923
met52464	-0.0574177	0.0800231	1791.24	-0.717515	0.47315	1	0.90324
met52450	0.0422299	0.0587941	1562.21	0.718266	0.4727	1	0.90324
met53258	0.0163741	0.0228922	1432.27	0.715269	0.474559	1	0.90324
met1105	-0.0501209	0.0699024	1330.73	-0.717012	0.473492	1	0.90324
met47654	0.00862575	0.0119425	1372.37	0.722275	0.470249	1	0.90324
met47393	-0.0133162	0.018329	1304.35	-0.726506	0.467659	1	0.90324
met46970	-0.0282575	0.0396467	1544.27	-0.712734	0.476118	1	0.903476
met53176	0.022427	0.0317949	1356.17	0.705366	0.480704	1	0.908001
met52697	-0.0814548	0.11908	1676.33	-0.684036	0.494047	1	0.908001
met36602	0.0246344	0.0356401	1271.52	0.691198	0.489567	1	0.908001
met52454	-0.125038	0.19236	1585.29	-0.650022	0.515772	1	0.908001
met42448	-0.0436473	0.0635431	1636.26	-0.686893	0.492248	1	0.908001
met38395	-0.0141086	0.0218937	1209.51	-0.644414	0.519429	1	0.908001
met33173	0.00373463	0.00573659	1308.7	0.651019	0.515149	1	0.908001
met1432	-0.0180477	0.0281786	1232.16	-0.640475	0.521983	1	0.908001
met45095	-0.030903	0.047816	1219.54	-0.646289	0.518214	1	0.908001
met34365	-0.00644546	0.00927494	1296.24	-0.694933	0.487222	1	0.908001
met53242	0.0605255	0.0916337	1617.24	0.660516	0.509017	1	0.908001
met32827	-0.017904	0.0277481	1836.45	-0.645235	0.518856	1	0.908001
met42381	0.0165601	0.0259443	1551.32	0.638294	0.523377	1	0.908001
met22137	0.0596517	0.0906441	1807.12	0.658087	0.510566	1	0.908001
met54955	-0.0154107	0.0231337	1307.37	-0.666158	0.505428	1	0.908001
met1121	-0.047891	0.0703087	1299.45	-0.681154	0.495896	1	0.908001
met57512	0.0472123	0.0686656	1621.14	0.687569	0.491823	1	0.908001
met54979	0.0611356	0.0947959	1759.21	0.644918	0.519064	1	0.908001
met61867	-0.033668	0.0520366	1589.48	-0.647007	0.517721	1	0.908001
met33936	0.0374295	0.0589144	1767.13	0.635321	0.525302	1	0.908001
met32562	-0.0307631	0.0474902	1810.32	-0.647778	0.517211	1	0.908001
met61858	0.0427589	0.0630088	1512.5	0.678617	0.497484	1	0.908001
met57476	0.048939	0.0734758	1685.46	0.666055	0.505467	1	0.908001
met36850	0.0172696	0.0272316	1472.5	0.634177	0.526064	1	0.908001
met3147	-0.059391	0.0860849	1673.48	-0.689912	0.490345	1	0.908001
met46601	0.0342925	0.049363	1685.44	0.6947	0.487339	1	0.908001
met47642	-0.0334794	0.0499798	1654.04	-0.66986	0.503041	1	0.908001
met46662	-0.0411118	0.0627036	1608.07	-0.655652	0.512142	1	0.908001
met46409	-0.0311384	0.0481921	1582.69	-0.646131	0.518288	1	0.908001
met46905	-0.0278551	0.0437827	1504.88	-0.636212	0.524735	1	0.908001
met52025	0.0177301	0.0270681	1409.24	0.655018	0.512563	1	0.908001
met52533	-0.0243227	0.0379161	1519.89	-0.641487	0.521303	1	0.908001
met52773	-0.0170866	0.0262632	1645.69	-0.650593	0.5154	1	0.908001
met46707	-0.0256721	0.0409365	1353.72	-0.627121	0.530686	1	0.913476
met61846	0.0189937	0.0304834	1814.9	0.623085	0.533307	1	0.915486
met33228	0.0665747	0.108019	1849.74	0.616325	0.537756	1	0.91812
met49681	0.0404509	0.0654644	1569.9	0.617908	0.536726	1	0.91812
met35132	-0.0509066	0.0837961	1592.05	-0.607506	0.543602	1	0.922721
met1444	0.0288354	0.0475069	1345.2	0.606972	0.543972	1	0.922721
met52772	0.0224591	0.0370828	1426.49	0.605648	0.544845	1	0.922721
met52475	0.0451809	0.0892983	1664.46	0.505954	0.612956	1	0.923235
met52669	-0.0287831	0.0557876	1703.16	-0.515941	0.605962	1	0.923235
met19324	0.0277674	0.0540571	1312.59	0.513668	0.60757	1	0.923235
met46165	-0.0087408	0.0152106	1259.72	-0.574652	0.565629	1	0.923235
met15681	0.0213678	0.038318	1622.31	0.557643	0.577165	1	0.923235
met61833	-0.0861447	0.146896	1792	-0.586435	0.557657	1	0.923235
met33937	0.0389639	0.0747222	1822.6	0.521451	0.602116	1	0.923235
met512	0.121395	0.223911	1705.8	0.542158	0.587781	1	0.923235
met47886	0.0456583	0.0879969	1752.11	0.518862	0.603922	1	0.923235
met43333	0.00451665	0.00759464	1463.39	0.594715	0.552126	1	0.923235
met34396	0.033286	0.0598815	1379.22	0.555864	0.578394	1	0.923235
met18368	0.0219975	0.0436087	1725.97	0.504428	0.614025	1	0.923235
met46106	0.00466833	0.00867393	1365.84	0.538202	0.590525	1	0.923235
met17805	-0.0305195	0.0597829	1321.3	-0.510506	0.609782	1	0.923235
met22163	0.0524405	0.0965712	884.459	0.543025	0.58725	1	0.923235
met39831	-0.0314377	0.0584586	1315.29	-0.537778	0.590821	1	0.923235
met57519	0.0464402	0.0832363	1567.62	0.557932	0.57697	1	0.923235
met15140	0.0761749	0.135756	1712.11	0.561118	0.574791	1	0.923235
met34035	-0.0309648	0.0530759	1344.6	-0.583406	0.559718	1	0.923235
met46144	0.00623458	0.0106406	1380.41	0.585921	0.558024	1	0.923235
met43488	0.0451939	0.0834759	1826.62	0.5414	0.588298	1	0.923235
met36845	-0.00351245	0.00618007	1361.24	-0.568351	0.56989	1	0.923235
met52285	-0.0357049	0.0703598	1274.02	-0.507462	0.611919	1	0.923235
met38102	-0.0346975	0.0617917	1316.12	-0.561524	0.574536	1	0.923235
met22130	0.0579287	0.10105	1748.34	0.573269	0.566537	1	0.923235
met566	-0.0332156	0.0556381	1364.1	-0.596994	0.550611	1	0.923235
met1600	-0.0284406	0.0561684	1298.4	-0.506345	0.6127	1	0.923235
met31932	0.0164588	0.0312212	1514.43	0.527168	0.598154	1	0.923235
met42382	-0.0192	0.0348501	1611.77	-0.550929	0.581758	1	0.923235
met57479	0.0605792	0.112719	1797.22	0.537438	0.591032	1	0.923235
met1358	-0.0691306	0.124086	1356.33	-0.55712	0.577537	1	0.923235
met57464	0.0172875	0.0331065	1374.53	0.522178	0.60163	1	0.923235
met27738	-0.0336609	0.0646555	1450.94	-0.520619	0.602711	1	0.923235
met46600	0.0123189	0.0223623	1375.94	0.550878	0.581807	1	0.923235
met46610	-0.0124588	0.0218856	1347.69	-0.56927	0.569268	1	0.923235
met47909	0.0182065	0.0342911	1451.08	0.530938	0.595543	1	0.923235
met46618	-0.0311277	0.0564665	1490.84	-0.551259	0.581539	1	0.923235
met47441	0.0468429	0.0784245	1260.64	0.597299	0.550415	1	0.923235
met47985	-0.0143872	0.0271396	1672.04	-0.530117	0.596101	1	0.923235
met40097	-0.0795727	0.138266	1715.43	-0.575506	0.565025	1	0.923235
met46672	0.00943389	0.0174622	1313.47	0.540245	0.58912	1	0.923235
met46701	-0.0293723	0.0582181	1819.74	-0.504521	0.613956	1	0.923235
met46388	0.0385595	0.0698666	1553.38	0.551903	0.581094	1	0.923235
met46515	-0.0157491	0.0274359	1735.34	-0.574032	0.566021	1	0.923235
met46519	0.0101455	0.0182304	1342.65	0.556515	0.577952	1	0.923235
met48994	-0.014508	0.028647	1303.42	-0.50644	0.612633	1	0.923235
met57720	0.0114289	0.0223233	1718.62	0.511971	0.608737	1	0.923235
met44621	-0.0179911	0.042124	1495.17	-0.427098	0.66937	1	0.924461
met34214	-0.0382108	0.0771644	1355.02	-0.495187	0.620549	1	0.924461
met45951	-0.0259355	0.0600663	1522.04	-0.431782	0.665961	1	0.924461
met52466	-0.0263549	0.054186	1822.34	-0.486379	0.626757	1	0.924461
met38168	-0.0168954	0.0397596	1786.08	-0.424938	0.670933	1	0.924461
met57655	0.0202123	0.0488143	1263.34	0.414066	0.678896	1	0.924461
met41220	0.0371135	0.0786718	1316.3	0.471751	0.637183	1	0.924461
met46115	-0.0221516	0.0459998	1659.48	-0.481559	0.630183	1	0.924461
met1566	0.0348735	0.0786494	1839.57	0.443404	0.657525	1	0.924461
met32445	0.00599726	0.0129894	1260.45	0.461703	0.644374	1	0.924461
met12032	0.00306586	0.00733151	1348.59	0.418176	0.675885	1	0.924461
met46146	0.0161918	0.0358711	1414.02	0.451388	0.651779	1	0.924461
met37192	0.0106505	0.02502	1844.05	0.425681	0.67039	1	0.924461
met35101	0.0028776	0.00601028	1297.56	0.47878	0.632176	1	0.924461
met48782	-0.044409	0.108315	1396.83	-0.409998	0.68187	1	0.924461
met32492	0.0127584	0.0296728	1206.24	0.429971	0.667294	1	0.924461
met22842	-0.00728757	0.0169209	1358.18	-0.430684	0.666766	1	0.924461
met15506	0.0674933	0.164468	1556.46	0.410373	0.681588	1	0.924461
met35637	0.0217255	0.0479551	1723.81	0.453039	0.650578	1	0.924461
met35718	-0.0348413	0.0791285	1383.89	-0.440312	0.65978	1	0.924461
met53262	-0.0116218	0.0260074	1330.71	-0.446866	0.655045	1	0.924461
met601	0.025171	0.0571486	1370.22	0.440449	0.659682	1	0.924461
met47114	-0.00332128	0.00732886	1305.54	-0.453178	0.650496	1	0.924461
met2734	0.0370562	0.0894262	1410.28	0.414378	0.67866	1	0.924461
met32328	-0.0313367	0.0686922	1736.11	-0.45619	0.64831	1	0.924461
met48153	0.066088	0.138587	1583.4	0.476869	0.633521	1	0.924461
met31536	0.00331495	0.00683384	1362.23	0.485079	0.627698	1	0.924461
met27710	0.0272608	0.0638756	1683.74	0.42678	0.669594	1	0.924461
met33967	0.0223248	0.0514476	1249.74	0.433932	0.664413	1	0.924461
met57664	0.0151988	0.0350069	1239.31	0.434167	0.664243	1	0.924461
met57687	-0.0396437	0.0856296	1826.4	-0.462967	0.643443	1	0.924461
met41888	0.00813874	0.0194476	1346.79	0.418496	0.675651	1	0.924461
met32306	-0.0336498	0.0743112	1248.56	-0.452824	0.650755	1	0.924461
met42593	0.0118556	0.028962	1554.33	0.409349	0.68234	1	0.924461
met48674	0.00260086	0.00594078	1336.63	0.437797	0.661604	1	0.924461
met46390	-0.0346306	0.0819683	1784	-0.422488	0.67272	1	0.924461
met46616	-0.0237243	0.0500973	1577.2	-0.473564	0.635877	1	0.924461
met46621	-0.0277539	0.0636283	1847.55	-0.436188	0.662751	1	0.924461
met46364	-0.00811461	0.0168417	1234.25	-0.481817	0.630022	1	0.924461
met46733	-0.0101144	0.0205209	1575.92	-0.492882	0.622165	1	0.924461
met46689	-0.0126772	0.0255207	1383.52	-0.496743	0.619449	1	0.924461
met46486	0.0139305	0.0306022	1754.12	0.455212	0.649013	1	0.924461
met46906	0.00595111	0.0127035	1405.01	0.468462	0.639527	1	0.924461
met48067	-0.0242371	0.0496667	1533.98	-0.487994	0.625624	1	0.924461
met52873	-0.0110923	0.0225973	1309.54	-0.49087	0.623601	1	0.924461
met52909	0.0395234	0.0824295	1657.64	0.479481	0.63166	1	0.924461
met37202	-0.0183283	0.0452237	1824.49	-0.405281	0.685319	1	0.926504
met32457	0.0213883	0.0535345	1422.09	0.399524	0.689567	1	0.930083
met57474	0.0420413	0.106384	1706.64	0.395184	0.692756	1	0.930083
met47000	-0.00831763	0.0211277	1477.01	-0.393683	0.693872	1	0.930083
met46904	-0.0112848	0.0284602	1374.18	-0.396512	0.691789	1	0.930083
met62066	0.0080403	0.0207826	1554.67	0.386878	0.6989	1	0.934101
met22185	0.0665628	0.17332	1416.84	0.384047	0.701001	1	0.934101
met42092	-0.0313717	0.0817768	1330.29	-0.383626	0.701317	1	0.934101
met6146	-0.0133144	0.0350307	1792.97	-0.380078	0.703933	1	0.935346
met36103	0.0148615	0.0392797	1557.89	0.378351	0.705221	1	0.935346
met46331	0.00394198	0.0104958	1305.96	0.375578	0.707292	1	0.936122
met52446	0.0278071	0.0763892	1738.62	0.364018	0.715889	1	0.943768
met37752	-0.0149268	0.0412993	1242.28	-0.36143	0.71784	1	0.943768
met36747	0.0617519	0.171643	1803.08	0.35977	0.719062	1	0.943768
met20694	-0.0289572	0.0797833	1592.52	-0.362948	0.716692	1	0.943768
met36594	-0.0237547	0.0681912	1415.45	-0.348355	0.727625	1	0.94822
met52462	0.0531756	0.182134	1832.99	0.291958	0.770351	1	0.94822
met42449	-0.022892	0.0697747	1767.6	-0.328085	0.742886	1	0.94822
met52447	-0.026567	0.0936296	1814.8	-0.283746	0.776638	1	0.94822
met38768	0.0102471	0.0303603	1399.23	0.337517	0.735778	1	0.94822
met37198	-0.00884122	0.0297417	1607.48	-0.297267	0.766301	1	0.94822
met38321	0.0133021	0.0415507	1561.58	0.320143	0.748903	1	0.94822
met62101	0.0411507	0.129883	1604.49	0.316829	0.751414	1	0.94822
met37203	-0.0141017	0.0474134	1705.97	-0.297421	0.766181	1	0.94822
met1110	-0.0244438	0.0831871	1408.09	-0.293841	0.768923	1	0.94822
met57461	0.0192102	0.0646842	1485.43	0.296985	0.766519	1	0.94822
met1769	0.0245803	0.0757262	1263.43	0.324594	0.745542	1	0.94822
met44675	-0.0162617	0.0568288	1647.86	-0.286152	0.774798	1	0.94822
met35436	-0.00621612	0.0210995	1515.29	-0.29461	0.768332	1	0.94822
met34407	-0.025646	0.0746282	1565.88	-0.34365	0.731156	1	0.94822
met47136	0.00198651	0.00674655	1180.54	0.294448	0.768467	1	0.94822
met48434	-0.00796751	0.0247725	1797.76	-0.321627	0.747773	1	0.94822
met1498	-0.0238319	0.0728328	1337.54	-0.327214	0.743557	1	0.94822
met38165	0.0416037	0.13059	1567.48	0.318582	0.750086	1	0.94822
met52925	-0.00703541	0.0247408	1466.97	-0.284365	0.776171	1	0.94822
met57477	0.0350084	0.116908	1722.09	0.299452	0.764632	1	0.94822
met52435	0.0340367	0.113153	1573.57	0.300802	0.763606	1	0.94822
met38625	-0.0275962	0.0861219	1457.28	-0.320432	0.748687	1	0.94822
met18494	-0.00601899	0.0193403	1486.39	-0.311215	0.755681	1	0.94822
met1604	-0.0553033	0.166844	1840.6	-0.331467	0.74033	1	0.94822
met46459	0.00515731	0.0175291	1336.85	0.294215	0.76864	1	0.94822
met46982	0.00431407	0.0128335	1408.98	0.336157	0.736802	1	0.94822
met46639	-0.00490523	0.0172619	1626.91	-0.284165	0.77632	1	0.94822
met46655	0.00532746	0.0184684	1449.53	0.288463	0.773033	1	0.94822
met47872	-0.016159	0.0516626	1676.28	-0.312779	0.754487	1	0.94822
met46728	0.00628894	0.019567	1383.11	0.321406	0.747952	1	0.94822
met49228	-0.0122961	0.0371501	1211.36	-0.330986	0.740713	1	0.94822
met49517	0.00635276	0.0218653	1590.22	0.29054	0.771441	1	0.94822
met52867	0.00706184	0.0220023	1712.72	0.320959	0.748281	1	0.94822
met57715	0.0203306	0.0603036	1806.67	0.337137	0.736052	1	0.94822
met57718	-0.0148529	0.0453545	1606.08	-0.327485	0.743344	1	0.94822
met42450	0.0556123	0.198022	1854.94	0.280839	0.778865	1	0.949101
met33935	0.00591033	0.021528	1455.64	0.274541	0.783708	1	0.951321
met49557	0.0172591	0.0628664	1695.53	0.274536	0.783706	1	0.951321
met46455	0.00415161	0.0154586	1475.99	0.268563	0.788303	1	0.95506
met18245	0.0332044	0.126963	1435.25	0.261528	0.793723	1	0.957942
met52944	0.011296	0.0429502	1392.09	0.263003	0.792587	1	0.957942
met35527	0.0106392	0.0411706	1420.83	0.258418	0.796122	1	0.957944
met1587	0.0128369	0.050708	1452.25	0.253154	0.800185	1	0.957944
met52437	0.0451397	0.178712	1729.93	0.252583	0.80062	1	0.957944
met605	-0.00992741	0.0386437	1312.24	-0.256896	0.797299	1	0.957944
met52502	-0.0123348	0.0490062	960.584	-0.251699	0.801328	1	0.957944
met52477	-0.0142302	0.0602632	1192.44	-0.236135	0.813369	1	0.961393
met52616	-0.0226672	0.0934356	1430.77	-0.242597	0.808352	1	0.961393
met36746	0.017883	0.0737499	1642.42	0.242482	0.808437	1	0.961393
met52984	-0.0136382	0.0568414	1602.16	-0.239935	0.810411	1	0.961393
met15736	0.00140317	0.00582111	1342.21	0.241049	0.809554	1	0.961393
met37211	0.00986521	0.041609	1836.6	0.237093	0.812611	1	0.961393
met52713	0.0268585	0.122016	1850.22	0.220123	0.8258	1	0.962771
met43266	0.00455335	0.0204663	1534.16	0.222481	0.823969	1	0.962771
met1418	-0.0230053	0.0995187	1328.79	-0.231165	0.817222	1	0.962771
met57443	0.0228483	0.106286	1688.96	0.21497	0.829817	1	0.962771
met36808	-0.0322523	0.145453	1644.82	-0.221737	0.824546	1	0.962771
met57658	-0.00420477	0.0192275	1813.36	-0.218685	0.82692	1	0.962771
met57370	-0.0237574	0.109835	1825.55	-0.216301	0.828777	1	0.962771
met48490	0.0369521	0.171457	1582.83	0.215519	0.829391	1	0.962771
met52297	-0.00363581	0.0167413	1425.71	-0.217176	0.828102	1	0.962771
met52640	-0.0050483	0.0232874	1460.36	-0.216782	0.828409	1	0.962771
met1572	0.0215438	0.101561	1565.94	0.212127	0.832036	1	0.963571
met32425	0.0112686	0.0541266	1739.9	0.208189	0.835106	1	0.963584
met18467	-0.00958833	0.0460466	1703.41	-0.208231	0.835074	1	0.963584
met32586	-0.0130086	0.0630805	1732.34	-0.206223	0.836641	1	0.96359
met49542	0.00620736	0.030553	1647.06	0.203167	0.83903	1	0.964578
met46628	-0.0056221	0.0280847	1463.04	-0.200184	0.841365	1	0.965201
met53172	0.00390468	0.019665	1394.75	0.19856	0.842636	1	0.965201
met35136	0.0215591	0.110918	1305.18	0.194371	0.845916	1	0.965448
met41726	-0.00634893	0.0325882	1535.73	-0.194823	0.845557	1	0.965448
met54841	-0.0202683	0.107281	1233.41	-0.188927	0.850181	1	0.968561
met35631	0.0181321	0.0994126	1582.15	0.182392	0.855298	1	0.969133
met53260	-0.00697471	0.0381785	1349.27	-0.182687	0.855071	1	0.969133
met1284	-0.0275526	0.149547	1636.17	-0.184241	0.853847	1	0.969133
met44656	0.00707215	0.0397138	1215.31	0.178078	0.858691	1	0.96949
met57407	0.00347113	0.0193259	1637.72	0.17961	0.857481	1	0.96949
met35126	0.00894172	0.0516798	1569.4	0.173021	0.862657	1	0.970489
met2125	0.0173848	0.099878	1239.07	0.17406	0.861847	1	0.970489
met57554	-0.0229401	0.136299	1584.69	-0.168307	0.866364	1	0.971504
met587	-0.0165084	0.0994535	1560.32	-0.165991	0.868186	1	0.971504
met48990	0.0230265	0.137527	1622.73	0.167432	0.867051	1	0.971504
met33230	-0.013255	0.101944	1621.87	-0.130022	0.896565	1	0.974936
met42398	0.0136096	0.103546	1586.31	0.131435	0.895448	1	0.974936
met47135	0.00363447	0.0247014	1678.98	0.147136	0.883042	1	0.974936
met35675	0.00934128	0.112814	1233.32	0.0828021	0.934022	1	0.974936
met17945	-0.0166453	0.116545	1226.56	-0.142823	0.886453	1	0.974936
met55072	0.00288921	0.036602	1277.25	0.0789359	0.937096	1	0.974936
met54809	0.00155928	0.0146671	1274.18	0.106311	0.915352	1	0.974936
met61769	0.00785841	0.0682718	1576.82	0.115105	0.908377	1	0.974936
met37190	-0.00503234	0.0319453	1796.21	-0.15753	0.874845	1	0.974936
met32980	0.00342824	0.0416262	1182.93	0.0823578	0.934376	1	0.974936
met1126	-0.0119129	0.161045	1608.61	-0.0739724	0.941042	1	0.974936
met443	-0.00989521	0.0926572	1380.59	-0.106794	0.914968	1	0.974936
met48728	-0.00138347	0.00879432	1196.16	-0.157313	0.875024	1	0.974936
met33941	0.00482231	0.0552038	1684.47	0.0873548	0.9304	1	0.974936
met47112	-0.00201177	0.0278574	1641.96	-0.0722168	0.942438	1	0.974936
met33949	0.0122423	0.0935251	1652.01	0.130899	0.895871	1	0.974936
met33422	0.0150907	0.106142	1402.74	0.142175	0.886962	1	0.974936
met43829	-0.00619183	0.0730045	1492.84	-0.0848144	0.93242	1	0.974936
met62061	-0.00143527	0.00935508	1178.65	-0.153421	0.878093	1	0.974936
met48152	-0.0274634	0.24624	1615.4	-0.111531	0.911209	1	0.974936
met61887	0.00165417	0.0176283	1383.8	0.0938362	0.925253	1	0.974936
met52983	-0.00206154	0.0252902	1587.56	-0.0815153	0.935042	1	0.974936
met57741	-0.0072862	0.0788368	1813.67	-0.0924213	0.926374	1	0.974936
met18477	-0.00205794	0.0168112	1495.27	-0.122415	0.902587	1	0.974936
met52234	0.0072523	0.0811943	1498.41	0.0893204	0.928839	1	0.974936
met40473	0.00544429	0.0527382	1545.32	0.103232	0.917792	1	0.974936
met590	-0.00272775	0.0365685	1526.26	-0.074593	0.940548	1	0.974936
met57422	0.00644172	0.058913	1472.37	0.109343	0.912945	1	0.974936
met39732	0.00211545	0.0251584	1406.49	0.0840854	0.933001	1	0.974936
met594	-0.00621848	0.0522011	1240.04	-0.119126	0.905195	1	0.974936
met48841	0.00270009	0.0218423	1546.7	0.123617	0.901634	1	0.974936
met35127	0.0115548	0.0800519	1681.91	0.144342	0.885248	1	0.974936
met17769	-0.00380191	0.0359286	1730.12	-0.105819	0.915739	1	0.974936
met52495	0.0131869	0.101801	1585.07	0.129536	0.89695	1	0.974936
met1299	0.0162362	0.178919	1675.78	0.0907458	0.927705	1	0.974936
met46594	-0.0112755	0.0838459	1814.86	-0.134478	0.893039	1	0.974936
met47652	-0.00351122	0.0286154	1557.38	-0.122704	0.902358	1	0.974936
met33132	-0.0240947	0.184527	1829.5	-0.130575	0.896126	1	0.974936
met46521	0.00137152	0.0127303	1196.83	0.107737	0.914223	1	0.974936
met46646	-0.0016126	0.0212667	1362.41	-0.0758274	0.939568	1	0.974936
met46384	-0.00623098	0.0599609	1829.33	-0.103917	0.917246	1	0.974936
met46972	0.0105169	0.0804284	1262.53	0.130761	0.895985	1	0.974936
met47011	0.00176247	0.0179676	1331.56	0.0980915	0.921874	1	0.974936
met48992	0.00554371	0.0463899	1544.17	0.119502	0.904893	1	0.974936
met49463	0.0029333	0.0258852	1375.17	0.11332	0.909794	1	0.974936
met52835	-0.00336171	0.0427296	1370.58	-0.0786739	0.937303	1	0.974936
met20675	0.00491275	0.0730067	1823.04	0.0672917	0.946357	1	0.976342
met48258	0.00938593	0.1409	1701.82	0.0666141	0.946897	1	0.976342
met53	0.0149694	0.278205	1636.32	0.053807	0.957095	1	0.983067
met46503	-0.00107292	0.0204186	1622.64	-0.0525461	0.9581	1	0.983067
met52879	-0.00100498	0.0189919	1453.46	-0.0529161	0.957806	1	0.983067
met53261	0.0018293	0.0434472	1445.45	0.0421041	0.966422	1	0.988676
met47301	-0.00116164	0.0278255	1538	-0.0417473	0.966706	1	0.988676
met34457	-0.00243871	0.0658876	1221.78	-0.0370133	0.97048	1	0.990928
met46510	-0.000728631	0.021084	1544.47	-0.0345585	0.972436	1	0.991318
met1584	0.000264338	0.00844055	1541.02	0.0313176	0.97502	1	0.992347
met52634	-0.000810912	0.0311435	1495.49	-0.0260379	0.979231	1	0.995025
met46623	0.000567667	0.0246041	1528.08	0.023072	0.981596	1	0.995822
met47031	0.000156909	0.00751549	1341.6	0.0208781	0.983346	1	0.995994
met32397	-0.00175067	0.0955907	1538.37	-0.0183143	0.985391	1	0.996462
met46683	0.000782697	0.0504088	1545.87	0.015527	0.987614	1	0.99711
met52478	0.000735226	0.133483	1854.16	0.00550801	0.995606	1	0.997927
met58	0.000366276	0.140933	1805.46	0.00259893	0.997927	1	0.997927
met527	-0.000423439	0.111141	1622.22	-0.00380992	0.996961	1	0.997927
met46602	0.00016316	0.0480807	1563.44	0.00339346	0.997293	1	0.997927
met47013	-0.000224434	0.0451597	1542.56	-0.00496978	0.996035	1	0.997927
met53127	-0.000227372	0.071203	1307.87	-0.00319329	0.997453	1	0.997927

## Sheet: Plasma-IMM
Supplementary Table S3. Associations between metabolites and cognitive function. Each linear mixed model included a random intercept for family and individual and a random slope for age.
The outcome was a cognitive function and metabolite, smoking status, sex, race, education level, practice effect.
COMP.ID	Estimate	Std..Error	df	t.value	Pr...t..	Bon	FDR
met32377	-0.492044	0.122755	1675.24	-4.00836	6.38251e-05	0.0402098	0.0402098
met37432	-0.237274	0.0664597	1319.22	-3.57019	0.000369537	0.232809	0.116404
met37207	0.130307	0.0403091	1853.46	3.23269	0.00124784	0.786137	0.196534
met52286	0.149917	0.0460517	1465.19	3.25541	0.00115816	0.729642	0.196534
met47773	0.0601851	0.0192596	1692.98	3.12495	0.00180856	1	0.227878
met1549	0.232368	0.078485	1574.01	2.96066	0.00311572	1	0.327151
met22132	0.29189	0.101587	1609.26	2.87331	0.00411524	1	0.34814
met52483	0.264382	0.0927581	1719.31	2.85023	0.00442082	1	0.34814
met46261	0.132124	0.047032	1490.69	2.80923	0.00503083	1	0.352158
met48885	-0.386162	0.145517	1812.93	-2.65374	0.00803019	1	0.505902
met36098	-0.0770474	0.0300698	1491.19	-2.56228	0.0104961	1	0.60114
met44526	0.438549	0.179671	1719.51	2.44084	0.0147533	1	0.670262
met33441	0.173606	0.0710392	1807.64	2.44381	0.0146281	1	0.670262
met46690	0.0797309	0.0327116	1717.32	2.43739	0.0148947	1	0.670262
met32452	0.287226	0.119884	1778.98	2.39586	0.0166844	1	0.700745
met57747	-0.206142	0.0876155	1788.6	-2.3528	0.0187405	1	0.737908
met48989	-0.0478138	0.020545	1521.47	-2.32727	0.0200816	1	0.744202
met12129	0.253843	0.111101	1669.94	2.28479	0.0224498	1	0.771698
met46738	0.27075	0.119224	1720.85	2.27094	0.0232734	1	0.771698
met22116	0.353194	0.160046	1761.88	2.20683	0.0274545	1	0.778552
met37187	0.048668	0.0221903	1753.65	2.19321	0.0284233	1	0.778552
met46260	-0.342132	0.154234	1813.33	-2.21826	0.0266604	1	0.778552
met46607	0.0373547	0.0169737	1652.51	2.20074	0.0278923	1	0.778552
met43802	-0.294106	0.13543	1844.22	-2.17164	0.0300097	1	0.787755
met52438	-0.25401	0.118156	1534.73	-2.1498	0.0317273	1	0.799527
met1516	-0.295092	0.138652	1327.91	-2.12829	0.0334967	1	0.811651
met52690	0.063098	0.033595	1662.04	1.87819	0.0605297	1	0.818301
met52465	-0.126895	0.0703518	1827.6	-1.80373	0.071439	1	0.818301
met15676	0.336705	0.162951	1785.87	2.0663	0.0389445	1	0.818301
met35114	-0.372013	0.206132	1821.7	-1.80473	0.0712816	1	0.818301
met48569	-0.0140661	0.00708988	1502.35	-1.98397	0.0474407	1	0.818301
met57635	0.153048	0.0798111	1816.59	1.91763	0.0553141	1	0.818301
met57636	0.136319	0.0699143	1748.48	1.94981	0.0513588	1	0.818301
met53013	0.258328	0.130932	1798.93	1.973	0.0486483	1	0.818301
met22137	0.196352	0.102153	1841.01	1.92214	0.0547421	1	0.818301
met40730	-0.0920145	0.0491312	1707.52	-1.87283	0.0612622	1	0.818301
met57807	0.0475843	0.0245324	1552.64	1.93965	0.0526031	1	0.818301
met61873	-0.0210532	0.0115446	1506.85	-1.82363	0.0684056	1	0.818301
met35157	-0.215218	0.109242	1487.16	-1.97011	0.0490109	1	0.818301
met37252	-0.0417771	0.0225202	1762.02	-1.85509	0.0637499	1	0.818301
met57745	0.0530318	0.0285069	1685.69	1.86031	0.0630152	1	0.818301
met31932	0.0719664	0.0359239	1667.15	2.0033	0.0453068	1	0.818301
met48990	0.317566	0.157333	1751.22	2.01843	0.0436984	1	0.818301
met33969	-0.103519	0.0523787	1660.04	-1.97635	0.0482806	1	0.818301
met34409	0.209205	0.115776	1754.88	1.80698	0.0709372	1	0.818301
met1649	0.397382	0.199298	1690.2	1.9939	0.0463229	1	0.818301
met46590	-0.0466903	0.0241122	1456.64	-1.93637	0.0530152	1	0.818301
met46601	0.111646	0.0563298	1781.11	1.98201	0.0476315	1	0.818301
met47654	0.0256673	0.013855	1527.96	1.85257	0.0641367	1	0.818301
met47439	-0.0438829	0.0240843	1580.15	-1.82206	0.068635	1	0.818301
met46640	0.126712	0.069669	1799.17	1.81877	0.069113	1	0.818301
met46665	0.101648	0.0550672	1674.95	1.84588	0.0650853	1	0.818301
met46970	-0.0931229	0.0455438	1690.49	-2.04469	0.0410401	1	0.818301
met46902	0.0661108	0.0345516	1690.57	1.9134	0.0558661	1	0.818301
met54873	-0.046276	0.0245927	1640.12	-1.8817	0.0600539	1	0.818301
met37059	-0.0557007	0.031195	1537.26	-1.78557	0.0743663	1	0.821943
met48009	-0.113182	0.0631559	1643.16	-1.79211	0.0733	1	0.821943
met1107	-0.332545	0.189099	1494.96	-1.75858	0.0788536	1	0.841996
met42087	-0.053023	0.0300273	1824.02	-1.76583	0.0775925	1	0.841996
met43761	-0.112414	0.0656988	1523.33	-1.71105	0.0872751	1	0.84714
met48255	-0.194866	0.115866	1752.45	-1.68182	0.092782	1	0.84714
met57516	0.191497	0.113639	1853.17	1.68513	0.0921311	1	0.84714
met57658	-0.0370302	0.0216871	1853.03	-1.70747	0.0879013	1	0.84714
met46225	-0.137736	0.081109	1731.25	-1.69815	0.0896585	1	0.84714
met17769	0.0708821	0.0408173	1813.69	1.73657	0.0826327	1	0.84714
met15336	0.0152015	0.00896787	1360.45	1.69511	0.0902842	1	0.84714
met46295	0.103795	0.0608233	1781.56	1.7065	0.0880887	1	0.84714
met52025	0.0539148	0.0313597	1565.01	1.71924	0.0857691	1	0.84714
met54704	-0.243715	0.144226	1776.7	-1.68981	0.091239	1	0.84714
met52682	0.180369	0.134946	1856.72	1.3366	0.181518	1	0.850613
met52475	0.122176	0.102009	1784.5	1.1977	0.231193	1	0.850613
met52748	0.128544	0.105013	1730.57	1.22407	0.221091	1	0.850613
met45951	-0.0966343	0.0692272	1675.68	-1.3959	0.162929	1	0.850613
met53176	0.0394973	0.0368202	1506.89	1.07271	0.283575	1	0.850613
met53195	-0.107319	0.0766541	1749.39	-1.40004	0.16168	1	0.850613
met19258	-0.102633	0.0658522	1616.37	-1.55853	0.119303	1	0.850613
met52697	-0.211225	0.135646	1786.23	-1.55717	0.119607	1	0.850613
met35628	-0.135292	0.0876457	1581.43	-1.54363	0.122878	1	0.850613
met52461	-0.29755	0.197173	1706.7	-1.50908	0.131464	1	0.850613
met52470	-0.133745	0.0854337	1786.24	-1.56548	0.117647	1	0.850613
met61868	-0.123798	0.102551	1823.5	-1.20718	0.227521	1	0.850613
met52449	0.135829	0.118443	1770.48	1.14679	0.251624	1	0.850613
met52466	-0.0757362	0.0608423	1818.21	-1.2448	0.213367	1	0.850613
met42448	-0.0777362	0.072623	1757.72	-1.07041	0.284583	1	0.850613
met33971	-0.0824329	0.0633922	1539.84	-1.30036	0.193671	1	0.850613
met33972	-0.0761482	0.0649542	1453.29	-1.17234	0.241254	1	0.850613
met39609	-0.150447	0.0907224	1585.21	-1.65832	0.0974513	1	0.850613
met32197	0.190342	0.116063	1806.14	1.63999	0.101181	1	0.850613
met46548	-0.0641506	0.0573568	1839.6	-1.11845	0.263522	1	0.850613
met54805	-0.117682	0.101917	1737.59	-1.15468	0.248381	1	0.850613
met1558	-0.107604	0.0755409	1587.48	-1.42445	0.154512	1	0.850613
met38125	0.0412304	0.0297971	1488.64	1.3837	0.166657	1	0.850613
met48442	-0.0108653	0.00769003	1421.9	-1.4129	0.157904	1	0.850613
met61833	-0.202299	0.166272	1843.92	-1.21667	0.223885	1	0.850613
met43582	-0.124439	0.0902198	1512.11	-1.37929	0.16801	1	0.850613
met15685	0.06236	0.0550814	1813.63	1.13214	0.257723	1	0.850613
met47120	-0.0685605	0.0484036	1521.86	-1.41643	0.156853	1	0.850613
met38321	0.0539845	0.0469999	1540.32	1.14861	0.250896	1	0.850613
met57518	0.101371	0.0941759	1838.63	1.0764	0.281889	1	0.850613
met443	0.143031	0.107448	1535.3	1.33117	0.183331	1	0.850613
met43807	0.13866	0.113229	1818.78	1.2246	0.220884	1	0.850613
met1642	-0.0984785	0.080562	1645.58	-1.22239	0.221734	1	0.850613
met15500	0.32486	0.208065	1790.17	1.56134	0.118621	1	0.850613
met34396	0.0853835	0.0694959	1534.95	1.22861	0.219406	1	0.850613
met38637	0.0216309	0.0135565	1749.38	1.59561	0.110756	1	0.850613
met27718	0.105055	0.0975688	1847.8	1.07672	0.281744	1	0.850613
met513	-0.308729	0.274935	1849.43	-1.12292	0.261619	1	0.850613
met35637	0.0853837	0.0546143	1817.3	1.56339	0.118134	1	0.850613
met57520	0.0801055	0.0725178	1594.59	1.10463	0.269486	1	0.850613
met40481	-0.00882309	0.00702015	1426.21	-1.25682	0.209024	1	0.850613
met32415	-0.109713	0.0786924	1513.46	-1.3942	0.163463	1	0.850613
met44675	-0.0766108	0.0648897	1765.49	-1.18063	0.237908	1	0.850613
met32504	-0.0877612	0.0623404	1695.23	-1.40777	0.159381	1	0.850613
met18467	-0.0608494	0.0523829	1800.16	-1.16163	0.24554	1	0.850613
met33587	-0.103096	0.0664675	1490.12	-1.55108	0.121095	1	0.850613
met37459	0.0725144	0.0678831	1784.94	1.06822	0.285564	1	0.850613
met33949	-0.153842	0.106655	1766.72	-1.44243	0.149359	1	0.850613
met34457	-0.0819168	0.0770009	1364.33	-1.06384	0.287588	1	0.850613
met587	-0.129503	0.114163	1706.6	-1.13437	0.256797	1	0.850613
met58	-0.184729	0.156297	1728.84	-1.18191	0.237403	1	0.850613
met52983	0.037627	0.0290188	1727.71	1.29664	0.194927	1	0.850613
met52977	-0.0254643	0.0218545	1804.46	-1.16518	0.244102	1	0.850613
met57652	-0.0733569	0.06317	1544.42	-1.16126	0.245715	1	0.850613
met62060	-0.27699	0.19713	1777.04	-1.40512	0.160162	1	0.850613
met590	0.0454111	0.041845	1652.89	1.08522	0.277983	1	0.850613
met27513	-0.098315	0.0729428	1727.48	-1.34784	0.177887	1	0.850613
met18349	0.140155	0.111943	1756.25	1.25202	0.210729	1	0.850613
met1125	0.269329	0.234117	1729.31	1.1504	0.250137	1	0.850613
met1645	-0.0880883	0.0730529	1659.12	-1.20582	0.22806	1	0.850613
met60	0.369676	0.255537	1761.57	1.44666	0.14817	1	0.850613
met46223	0.147582	0.122564	1797.89	1.20412	0.228701	1	0.850613
met48153	0.188918	0.158959	1722.87	1.18847	0.234813	1	0.850613
met44878	-0.16527	0.101238	1839.28	-1.63249	0.102748	1	0.850613
met1584	-0.0120204	0.00967674	1675.24	-1.2422	0.214338	1	0.850613
met1365	-0.112269	0.073984	1544.16	-1.51748	0.129351	1	0.850613
met32418	-0.0692962	0.061731	1656.28	-1.12255	0.261791	1	0.850613
met45404	0.0105859	0.00761995	1406.94	1.38924	0.164981	1	0.850613
met48757	0.0332023	0.0292073	1762.61	1.13678	0.255784	1	0.850613
met33950	-0.11502	0.0803355	1817.5	-1.43174	0.15239	1	0.850613
met37496	-0.191321	0.148727	1854.61	-1.28639	0.198467	1	0.850613
met57664	0.0523661	0.040917	1386.86	1.27981	0.200825	1	0.850613
met44877	0.154819	0.145234	1659.81	1.066	0.286578	1	0.850613
met57417	0.0376268	0.034373	1692.39	1.09466	0.27382	1	0.850613
met48351	-0.164956	0.103763	1781.07	-1.58975	0.11207	1	0.850613
met36103	0.0675014	0.0450706	1698.6	1.49768	0.134402	1	0.850613
met33447	-0.0745205	0.054962	1579.82	-1.35586	0.175339	1	0.850613
met52434	0.240466	0.177468	1835.34	1.35498	0.175591	1	0.850613
met37506	0.319917	0.281918	1833.98	1.13479	0.256612	1	0.850613
met44681	0.14519	0.135786	1768.44	1.06926	0.285101	1	0.850613
met57564	-0.0830537	0.0638896	1487.58	-1.29996	0.193818	1	0.850613
met22130	0.125038	0.114774	1833.34	1.08943	0.276108	1	0.850613
met42109	-0.135316	0.126104	1384.29	-1.07305	0.283434	1	0.850613
met32619	0.0946627	0.0633615	1800.88	1.49401	0.135348	1	0.850613
met38170	0.055222	0.0375359	1847.49	1.47118	0.141413	1	0.850613
met40703	-0.0391159	0.0341401	1461.75	-1.14575	0.252087	1	0.850613
met48460	0.0091704	0.00764901	1551.22	1.1989	0.23075	1	0.850613
met18335	0.0268518	0.0194745	1786.8	1.37882	0.168124	1	0.850613
met27731	-0.124083	0.106376	1557.75	-1.16645	0.243609	1	0.850613
met1648	0.276177	0.194455	1849.76	1.42026	0.1557	1	0.850613
met52433	0.202578	0.169571	1850.33	1.19465	0.232376	1	0.850613
met57483	0.190512	0.12415	1857.1	1.53453	0.12507	1	0.850613
met37529	0.207687	0.174725	1822.9	1.18865	0.234732	1	0.850613
met42459	0.274786	0.225949	1850.99	1.21614	0.224086	1	0.850613
met1358	-0.203524	0.144217	1513.93	-1.41123	0.158382	1	0.850613
met37058	-0.228813	0.137428	1848.5	-1.66496	0.0960896	1	0.850613
met61836	-0.0464427	0.0315946	1565.3	-1.46996	0.141774	1	0.850613
met61848	-0.0462407	0.0319408	1447.68	-1.4477	0.147917	1	0.850613
met18392	0.0286439	0.0248571	1582.49	1.15234	0.249354	1	0.850613
met2761	0.238674	0.167686	1842.7	1.42334	0.154807	1	0.850613
met54	0.30654	0.207181	1614.75	1.47957	0.139182	1	0.850613
met1670	-0.163281	0.136987	1713.57	-1.19195	0.233446	1	0.850613
met15679	0.040172	0.0356874	1674.61	1.12566	0.26047	1	0.850613
met57517	0.161756	0.11752	1846.81	1.37642	0.16886	1	0.850613
met46459	0.0269115	0.0203559	1493	1.32205	0.186354	1	0.850613
met46360	0.0609883	0.0425458	1817.86	1.43347	0.151895	1	0.850613
met46443	0.0615661	0.043937	1816.06	1.40123	0.161315	1	0.850613
met46600	0.0335232	0.0259671	1538.92	1.29099	0.196903	1	0.850613
met47901	0.0237198	0.0209659	1528.58	1.13135	0.258086	1	0.850613
met47651	-0.0533715	0.0328134	1748.45	-1.62651	0.10402	1	0.850613
met46914	0.0999648	0.0651398	1763.23	1.53462	0.125057	1	0.850613
met46603	0.0879834	0.0650325	1777.15	1.35292	0.176255	1	0.850613
met46588	0.0529425	0.0475924	1713.03	1.11242	0.266115	1	0.850613
met47642	-0.0875041	0.0570951	1777.28	-1.5326	0.125552	1	0.850613
met46621	-0.0884911	0.0714227	1848.12	-1.23898	0.215511	1	0.850613
met46634	0.0599854	0.0516737	1764.41	1.16085	0.24586	1	0.850613
met46645	0.0353134	0.0223577	1414.54	1.57948	0.11445	1	0.850613
met47441	0.0974359	0.0915558	1407.05	1.06422	0.28741	1	0.850613
met47977	0.0307477	0.0227395	1798.89	1.35218	0.176489	1	0.850613
met47800	0.140132	0.0991881	1652.1	1.41279	0.157906	1	0.850613
met47824	-0.0281032	0.0187029	1304.26	-1.50261	0.133181	1	0.850613
met48047	-0.047733	0.0347447	1573.93	-1.37382	0.169692	1	0.850613
met46695	-0.0814718	0.0605698	1517.69	-1.34509	0.178797	1	0.850613
met46493	0.0924472	0.0577349	1820	1.60124	0.109498	1	0.850613
met46516	-0.0614679	0.0411945	1689.74	-1.49214	0.135849	1	0.850613
met46911	0.0204574	0.0155605	1690.79	1.3147	0.188789	1	0.850613
met46972	0.102769	0.0938746	1417.34	1.09475	0.273811	1	0.850613
met47393	-0.0269972	0.0213796	1454.98	-1.26276	0.206879	1	0.850613
met49463	0.0493351	0.0300323	1531.43	1.64273	0.100644	1	0.850613
met49536	-0.0412062	0.0346008	1650.62	-1.1909	0.233863	1	0.850613
met49637	-0.128259	0.115565	1529.22	-1.10984	0.267243	1	0.850613
met52524	0.0753012	0.0534001	1751.46	1.41013	0.158678	1	0.850613
met52525	-0.052722	0.0443796	1587.96	-1.18798	0.23502	1	0.850613
met52544	0.0387597	0.02485	1845.62	1.55974	0.118992	1	0.850613
met52769	-0.138547	0.115013	1768.8	-1.20462	0.22851	1	0.850613
met52772	0.0471024	0.0429004	1579.83	1.09795	0.272395	1	0.850613
met52790	0.0280897	0.0262815	1530.49	1.0688	0.285328	1	0.850613
met52865	0.0417765	0.0381845	1815.69	1.09407	0.27407	1	0.850613
met52881	-0.0282224	0.0212678	1522.88	-1.327	0.184706	1	0.850613
met53114	-0.0955287	0.0659932	1476.75	-1.44755	0.147954	1	0.850613
met53266	0.022091	0.0190236	1648.91	1.16125	0.24571	1	0.850613
met54841	-0.160395	0.125531	1375.14	-1.27773	0.20156	1	0.850613
met54877	0.0684409	0.0643037	1737.1	1.06434	0.287323	1	0.850613
met57715	0.0747672	0.0677475	1803.47	1.10362	0.269907	1	0.850613
met1121	-0.0863566	0.0819872	1455.34	-1.05329	0.292381	1	0.856746
met594	-0.0642949	0.0610374	1388.5	-1.05337	0.292356	1	0.856746
met43343	-0.0630893	0.0611112	1672.99	-1.03237	0.302048	1	0.857165
met57528	0.0368362	0.0353467	1758.9	1.04214	0.29749	1	0.857165
met38178	0.0794804	0.0768191	1819.3	1.03464	0.300973	1	0.857165
met18368	0.0513335	0.0494659	1804.35	1.03776	0.299523	1	0.857165
met15716	0.126033	0.121715	1746.57	1.03547	0.300591	1	0.857165
met46390	-0.0939049	0.0906884	1709.3	-1.03547	0.300597	1	0.857165
met57718	-0.0544879	0.0520447	1737.85	-1.04694	0.295271	1	0.857165
met17945	-0.134414	0.136314	1370.6	-0.986057	0.324279	1	0.859388
met62064	-0.0472146	0.0465772	1705.36	-1.01368	0.310877	1	0.859388
met35101	0.0070814	0.0070128	1451.81	1.00978	0.312768	1	0.859388
met17805	-0.0707306	0.0696126	1478.91	-1.01606	0.309767	1	0.859388
met57521	0.102368	0.1042	1850.89	0.982419	0.326022	1	0.859388
met5086	-0.128619	0.129949	1827.24	-0.989763	0.322421	1	0.859388
met47136	0.0078659	0.00792339	1317.31	0.992744	0.321017	1	0.859388
met1505	-0.104953	0.10397	1760.43	-1.00946	0.312895	1	0.859388
met1336	-0.111046	0.111986	1506.43	-0.991601	0.321551	1	0.859388
met1361	-0.110095	0.10869	1506.9	-1.01293	0.311256	1	0.859388
met33140	0.0564032	0.0566275	1712.61	0.996039	0.319372	1	0.859388
met46986	0.0221748	0.0223486	1586.16	0.992222	0.321241	1	0.859388
met46517	0.0595229	0.0604763	1839.45	0.984235	0.325129	1	0.859388
met46490	-0.0246466	0.0242442	1566.58	-1.0166	0.309503	1	0.859388
met49557	0.0709413	0.0717107	1805.07	0.989271	0.322663	1	0.859388
met57720	0.0253767	0.025424	1820.66	0.998141	0.318344	1	0.859388
met57756	0.0208484	0.0205835	1570	1.01287	0.311277	1	0.859388
met47135	0.0265264	0.0282079	1794.58	0.940387	0.347146	1	0.865586
met37752	-0.0455527	0.0483038	1387.21	-0.943047	0.345821	1	0.865586
met38296	-0.0854125	0.0911928	1535.99	-0.936615	0.349104	1	0.865586
met52602	0.0679753	0.0731713	1358.08	0.928987	0.353061	1	0.865586
met33173	0.00632094	0.00668711	1460.79	0.945242	0.344691	1	0.865586
met53242	0.10013	0.105166	1744.82	0.952119	0.341168	1	0.865586
met61887	0.019091	0.0204652	1538.61	0.932851	0.351044	1	0.865586
met1105	-0.0764425	0.0813479	1491.14	-0.939697	0.347525	1	0.865586
met57511	0.0939484	0.100049	1724.89	0.939022	0.347851	1	0.865586
met33959	0.0664075	0.069903	1719.4	0.949995	0.342248	1	0.865586
met52633	0.0313323	0.0322415	1689.48	0.971801	0.331289	1	0.865586
met1806	-0.151494	0.163104	1855.2	-0.928818	0.353104	1	0.865586
met57473	0.08143	0.0850904	1775.43	0.956982	0.338707	1	0.865586
met46960	-0.198459	0.206574	1811.43	-0.960717	0.336823	1	0.865586
met57691	0.0230118	0.0245142	1834.7	0.938712	0.348002	1	0.865586
met52436	0.14749	0.151697	1733.63	0.972269	0.331052	1	0.865586
met46672	0.0192089	0.0203512	1470.97	0.943871	0.345391	1	0.865586
met46728	0.0216179	0.0226863	1542.94	0.952908	0.340786	1	0.865586
met34365	-0.00993877	0.0108367	1443.85	-0.917136	0.359225	1	0.866672
met37475	0.0057492	0.00624278	1473.75	0.920936	0.357234	1	0.866672
met32198	0.107239	0.11676	1572.93	0.918455	0.358522	1	0.866672
met52788	-0.241235	0.263428	1817.53	-0.915752	0.359919	1	0.866672
met52909	0.0862885	0.094326	1780.54	0.91479	0.360426	1	0.866672
met52431	0.024952	0.027436	1527.08	0.909462	0.36325	1	0.867421
met33936	0.060783	0.066871	1841.04	0.908959	0.363491	1	0.867421
met63	0.137368	0.153789	1752.78	0.893223	0.37186	1	0.872906
met53	-0.285051	0.318314	1768.89	-0.895503	0.37064	1	0.872906
met15122	-0.0691429	0.0767408	1456.76	-0.900993	0.367741	1	0.872906
met35126	0.0530759	0.0592245	1704.67	0.896181	0.370283	1	0.872906
met46486	0.030992	0.0347594	1838.11	0.891613	0.372717	1	0.872906
met48841	0.0222441	0.0250952	1688.76	0.886388	0.375535	1	0.87379
met47872	0.0522551	0.058995	1792.52	0.885755	0.375868	1	0.87379
met37192	0.0247089	0.0281103	1848.15	0.878998	0.379517	1	0.876865
met52285	-0.0721002	0.0820987	1428.98	-0.878214	0.379975	1	0.876865
met35172	-0.0676426	0.0775944	1610.47	-0.871746	0.383477	1	0.87851
met46519	0.0184831	0.021199	1501.23	0.871886	0.38341	1	0.87851
met34397	0.0249414	0.0287066	1506.1	0.868839	0.385074	1	0.878973
met35631	-0.0970469	0.114128	1723.84	-0.850334	0.395258	1	0.885291
met33961	0.148104	0.179843	1740.42	0.823519	0.410326	1	0.885291
met42398	-0.0979376	0.118874	1725.28	-0.823876	0.410124	1	0.885291
met48580	-0.00583859	0.0070493	1476.6	-0.82825	0.407663	1	0.885291
met57	0.0689052	0.0831555	1754.8	0.828631	0.407426	1	0.885291
met1417	0.0850038	0.10317	1810.66	0.823917	0.410095	1	0.885291
met34035	-0.0515023	0.0617179	1504.91	-0.834478	0.404144	1	0.885291
met54968	0.0401403	0.048332	1573.16	0.830513	0.406375	1	0.885291
met36845	-0.00603693	0.00718114	1518.95	-0.840664	0.400669	1	0.885291
met12261	0.0187184	0.0222062	1695.35	0.842935	0.399384	1	0.885291
met36850	0.0268679	0.0314868	1626.69	0.853304	0.393616	1	0.885291
met46521	-0.0125108	0.0149195	1335.42	-0.838557	0.401868	1	0.885291
met46662	0.0603531	0.0719938	1734.01	0.838311	0.401972	1	0.885291
met47000	-0.0208285	0.0244074	1634.59	-0.853369	0.39358	1	0.885291
met47016	0.0155866	0.0185871	1683.8	0.83857	0.40183	1	0.885291
met53172	0.0195664	0.0227954	1551.8	0.858349	0.390832	1	0.885291
met52871	-0.0175445	0.021413	1536.75	-0.819338	0.412721	1	0.88742
met46173	-0.145974	0.17984	1762.35	-0.811687	0.417081	1	0.893744
met52616	-0.081373	0.107903	1571.1	-0.754134	0.450882	1	0.898821
met52452	0.187122	0.242562	1713.24	0.771439	0.440553	1	0.898821
met6146	0.0299268	0.0396041	1846.57	0.755648	0.449957	1	0.898821
met47031	-0.00657176	0.00875633	1496.12	-0.750515	0.453062	1	0.898821
met46115	0.0393966	0.0526506	1779.66	0.748265	0.454399	1	0.898821
met15736	-0.00521366	0.0067794	1500.41	-0.769044	0.441988	1	0.898821
met46146	0.0316793	0.0415785	1570.31	0.761914	0.446226	1	0.898821
met47886	0.0757758	0.0998573	1829.59	0.75884	0.448046	1	0.898821
met2137	0.0647657	0.0834874	1815.12	0.775754	0.437995	1	0.898821
met1564	0.201456	0.260922	1702.64	0.772094	0.440166	1	0.898821
met37063	-0.0419194	0.052862	1362.74	-0.792997	0.427918	1	0.898821
met44872	0.0963399	0.12936	1497.34	0.744743	0.456544	1	0.898821
met33422	-0.0983768	0.122948	1560.45	-0.800149	0.423746	1	0.898821
met15990	0.0734887	0.0982382	1551.57	0.748066	0.454533	1	0.898821
met31912	0.0203442	0.0256765	1627.75	0.792328	0.428285	1	0.898821
met61862	-0.0379487	0.0497085	1577.4	-0.763424	0.445325	1	0.898821
met527	0.0973216	0.127286	1751.78	0.764592	0.444618	1	0.898821
met54955	-0.0212448	0.0269693	1465.88	-0.787742	0.430975	1	0.898821
met52615	0.128786	0.163343	1829.58	0.78844	0.430542	1	0.898821
met48490	-0.155691	0.1968	1723.94	-0.791113	0.428987	1	0.898821
met57481	0.0771738	0.0987926	1754.13	0.78117	0.434808	1	0.898821
met57474	0.092902	0.121174	1811.74	0.766685	0.443368	1	0.898821
met19503	0.128964	0.16973	1769.68	0.75982	0.447464	1	0.898821
met46610	-0.0193918	0.0254336	1505.02	-0.762448	0.445912	1	0.898821
met46666	0.0134828	0.0179353	1658.81	0.751751	0.452308	1	0.898821
met52647	0.0255615	0.0343057	1847.32	0.745109	0.4563	1	0.898821
met48429	0.0118115	0.0159237	1664.67	0.74176	0.458337	1	0.89954
met43239	0.0064591	0.00877174	1319.13	0.736354	0.461646	1	0.903221
met57370	-0.0893854	0.123083	1807.33	-0.726223	0.467796	1	0.906805
met62059	-0.0479996	0.065693	1691.37	-0.730665	0.465085	1	0.906805
met38165	0.109311	0.150161	1712.38	0.727961	0.466737	1	0.906805
met57687	0.0693836	0.0960853	1821.2	0.722104	0.470323	1	0.908907
met52464	-0.0645883	0.0904123	1834.33	-0.714375	0.475086	1	0.912281
met32980	-0.0348287	0.0489232	1326.85	-0.711905	0.476649	1	0.912281
met61846	0.0244139	0.0343298	1819.46	0.711159	0.477077	1	0.912281
met1302	0.133904	0.188618	1525.29	0.709921	0.477861	1	0.912281
met57547	-0.0177793	0.0252143	1591.11	-0.705126	0.480835	1	0.912428
met57512	0.0557057	0.0787661	1750.14	0.70723	0.479518	1	0.912428
met52467	0.0476611	0.068929	1607.64	0.691452	0.489381	1	0.91759
met42449	-0.054859	0.0790589	1834.61	-0.6939	0.487833	1	0.91759
met3141	0.121716	0.174758	1789.77	0.696482	0.486217	1	0.91759
met62066	0.016585	0.0239076	1701.46	0.693715	0.487956	1	0.91759
met42446	0.186797	0.272344	1711.7	0.685887	0.492877	1	0.920808
met49681	0.0514729	0.0752446	1710.73	0.684074	0.494021	1	0.920808
met18477	-0.0132105	0.0194074	1651.79	-0.680694	0.496161	1	0.922068
met31591	0.0284711	0.0422537	1687.42	0.673813	0.500522	1	0.924987
met41726	0.0244938	0.0366129	1490.01	0.668992	0.503604	1	0.924987
met2125	0.0781637	0.116743	1395.52	0.669535	0.503265	1	0.924987
met46364	-0.0132204	0.0197294	1378.67	-0.670087	0.502915	1	0.924987
met48258	-0.103947	0.160481	1807.25	-0.647723	0.517246	1	0.925766
met38395	-0.0168406	0.0256707	1354.24	-0.656026	0.511919	1	0.925766
met38768	-0.0225138	0.035251	1554.87	-0.638671	0.523131	1	0.925766
met1566	-0.0566836	0.0881687	1822.1	-0.642899	0.52037	1	0.925766
met32445	0.00986208	0.0151915	1413.82	0.649182	0.516326	1	0.925766
met62103	0.0761031	0.114991	1275.84	0.661816	0.508209	1	0.925766
met62061	0.00724866	0.0109797	1320.94	0.660187	0.509249	1	0.925766
met57453	0.0708833	0.110423	1842.04	0.641928	0.521	1	0.925766
met1600	0.0420748	0.0655339	1454.93	0.642032	0.520954	1	0.925766
met42463	0.126648	0.197693	1855.2	0.640631	0.521841	1	0.925766
met1604	0.119917	0.187675	1853.69	0.638959	0.522929	1	0.925766
met46628	-0.0215792	0.0324484	1623.75	-0.665031	0.506125	1	0.925766
met46733	-0.0152357	0.0235833	1719.76	-0.646036	0.518342	1	0.925766
met32397	0.0687453	0.11008	1683.2	0.624502	0.532382	1	0.930991
met1126	0.114249	0.184688	1743.12	0.618602	0.536259	1	0.930991
met15506	0.117055	0.189302	1699.46	0.618349	0.536428	1	0.930991
met35159	0.0275556	0.044008	1767.45	0.626151	0.531297	1	0.930991
met38102	-0.0451088	0.0719231	1478.57	-0.627181	0.530638	1	0.930991
met47153	0.0858223	0.137404	1413.37	0.624598	0.532336	1	0.930991
met46473	-0.0472011	0.0760692	1791.08	-0.620503	0.535006	1	0.930991
met46165	-0.0106333	0.0177518	1410.32	-0.598999	0.54927	1	0.932902
met12032	-0.00517952	0.00853938	1506.61	-0.606545	0.544244	1	0.932902
met43333	0.00527563	0.00877293	1618.27	0.601353	0.547689	1	0.932902
met64	0.182628	0.303616	1745.35	0.60151	0.547579	1	0.932902
met57475	0.0849704	0.1419	1856.32	0.598806	0.549375	1	0.932902
met48674	-0.00424164	0.00690902	1492.43	-0.613927	0.539357	1	0.932902
met46460	-0.0433644	0.0723138	1698.7	-0.599671	0.548806	1	0.932902
met57714	0.0209409	0.0342118	1810.86	0.612096	0.540551	1	0.932902
met42593	0.0189887	0.0324791	1492.95	0.584643	0.558876	1	0.941422
met48408	-0.0141454	0.0240913	1504.82	-0.587156	0.557187	1	0.941422
met46409	-0.0324534	0.0553856	1713.96	-0.585954	0.557983	1	0.941422
met37209	0.0323715	0.0557125	1597.88	0.581045	0.561292	1	0.94297
met1494	0.121332	0.211133	1834.04	0.574671	0.565584	1	0.94514
met48782	-0.0724862	0.125904	1546.71	-0.575728	0.564883	1	0.94514
met57331	0.0499167	0.0892744	1793.61	0.559137	0.576138	1	0.950175
met35718	-0.0520057	0.0918237	1542.49	-0.566364	0.571229	1	0.950175
met53263	0.0191964	0.0340896	1624.75	0.563115	0.573434	1	0.950175
met33973	0.0245788	0.0434439	1607.33	0.565759	0.571637	1	0.950175
met49228	-0.02437	0.0434702	1364.89	-0.560614	0.575153	1	0.950175
met53223	-0.0490692	0.0882965	1756.32	-0.555732	0.578465	1	0.951357
met46602	0.0305908	0.0552505	1706.48	0.553674	0.579875	1	0.951357
met1432	-0.017893	0.0329837	1383.08	-0.54248	0.587575	1	0.952708
met35132	-0.0504974	0.0962674	1727.92	-0.524554	0.59996	1	0.952708
met33968	-0.0324305	0.0615684	1674.47	-0.526739	0.598445	1	0.952708
met61769	0.0418658	0.0784099	1718.03	0.533935	0.593455	1	0.952708
met62101	-0.0794337	0.149108	1743.17	-0.532726	0.594291	1	0.952708
met512	-0.13928	0.25495	1808.47	-0.546301	0.584926	1	0.952708
met32586	-0.0390739	0.0716777	1818.76	-0.545134	0.585729	1	0.952708
met38669	0.00736849	0.0137156	1719.38	0.537233	0.591176	1	0.952708
met32328	0.0410644	0.0781935	1824.18	0.525164	0.599533	1	0.952708
met1898	0.0808406	0.152093	1809.33	0.531522	0.595122	1	0.952708
met46707	-0.0249828	0.0476774	1512.6	-0.523997	0.600357	1	0.952708
met46906	-0.00793124	0.0147402	1563.02	-0.53807	0.590605	1	0.952708
met48067	-0.0303217	0.0572158	1686.33	-0.529952	0.596215	1	0.952708
met37211	0.0240499	0.0466802	1826.35	0.515205	0.606472	1	0.953832
met46643	0.0293762	0.0570831	1647.06	0.514622	0.606886	1	0.953832
met46710	0.00933206	0.017997	1461.57	0.518535	0.604164	1	0.953832
met47739	-0.0126954	0.0246854	1621.88	-0.514286	0.607122	1	0.953832
met46608	0.0411306	0.0812192	1830.09	0.506415	0.612627	1	0.960087
met52478	-0.0681321	0.148996	1815.15	-0.457276	0.647528	1	0.964279
met52713	0.0654396	0.136232	1811.4	0.480355	0.631033	1	0.964279
met34214	-0.041928	0.0896574	1515.58	-0.467646	0.640105	1	0.964279
met36594	-0.0366873	0.0789935	1577.34	-0.464434	0.642401	1	0.964279
met53209	-0.0142876	0.0298906	1831.02	-0.477998	0.632709	1	0.964279
met35305	0.0159797	0.0354995	1503.81	0.450138	0.652676	1	0.964279
met52611	-0.0544967	0.10967	1827.24	-0.496917	0.619307	1	0.964279
met45095	0.0259079	0.0560436	1370.41	0.462282	0.643953	1	0.964279
met55072	0.0208211	0.0427295	1435.62	0.487278	0.626136	1	0.964279
met37186	0.0120694	0.0274219	1836.7	0.440136	0.65989	1	0.964279
met57513	0.0329327	0.0751175	1714.6	0.438416	0.66114	1	0.964279
met46106	-0.00437452	0.0100989	1513.01	-0.433167	0.664955	1	0.964279
met36808	-0.0710749	0.165754	1747.2	-0.428797	0.668124	1	0.964279
met22163	0.0510245	0.115031	973.629	0.443573	0.65745	1	0.964279
met57519	0.0450125	0.0956187	1706.74	0.47075	0.63788	1	0.964279
met47114	-0.00365024	0.00854786	1456.44	-0.427035	0.669417	1	0.964279
met43493	0.0202748	0.0436507	1637.99	0.464479	0.642366	1	0.964279
met40473	0.0260596	0.0607352	1689.73	0.42907	0.667927	1	0.964279
met46144	0.00525379	0.0123373	1541	0.425847	0.670279	1	0.964279
met31536	0.00355894	0.00793895	1519.1	0.448288	0.654009	1	0.964279
met32390	0.0159389	0.0375792	1572.81	0.424141	0.671521	1	0.964279
met42092	-0.0436611	0.0949908	1488.77	-0.459636	0.645845	1	0.964279
met61865	-0.0286637	0.0608501	1758.19	-0.471054	0.637661	1	0.964279
met62152	0.0378485	0.0891324	1676.15	0.424632	0.671159	1	0.964279
met48493	-0.107595	0.221334	1806.79	-0.486123	0.626939	1	0.964279
met57480	0.0708431	0.147585	1851.6	0.480014	0.631274	1	0.964279
met53231	-0.0646528	0.131204	1759.55	-0.492765	0.62224	1	0.964279
met47687	-0.0779659	0.172917	1844.03	-0.450885	0.652125	1	0.964279
met47909	0.0194107	0.039653	1605.82	0.489513	0.624546	1	0.964279
met46510	0.0102655	0.0242358	1689.46	0.423569	0.671934	1	0.964279
met46632	0.0448513	0.090448	1776.11	0.49588	0.620041	1	0.964279
met47985	0.0135776	0.0310389	1782.36	0.43744	0.661845	1	0.964279
met46701	-0.0302207	0.0656408	1850.35	-0.460395	0.645287	1	0.964279
met46294	-0.0099149	0.0219274	1812.76	-0.45217	0.651201	1	0.964279
met46388	0.0364712	0.0802988	1701.98	0.454193	0.649748	1	0.964279
met48994	-0.014604	0.0334474	1455.2	-0.436625	0.662448	1	0.964279
met53127	-0.0413499	0.0832086	1453.22	-0.496943	0.619304	1	0.964279
met52623	0.0400284	0.0950833	1708.24	0.420982	0.673821	1	0.964485
met46331	-0.00514402	0.0122717	1438.92	-0.419178	0.675149	1	0.964485
met46905	-0.0210877	0.0505597	1654.65	-0.417085	0.676671	1	0.964485
met1418	-0.0476386	0.115906	1486.77	-0.411012	0.681123	1	0.968639
met52446	-0.0341287	0.0867961	1822.17	-0.393205	0.694214	1	0.971787
met22842	0.00787995	0.0196977	1517.49	0.400045	0.68918	1	0.971787
met52974	-0.00882784	0.0226207	1524.65	-0.390254	0.696403	1	0.971787
met15140	0.0585715	0.154651	1811.17	0.378732	0.704931	1	0.971787
met39732	-0.0112629	0.0291744	1563.94	-0.386054	0.699509	1	0.971787
met53260	-0.0168629	0.0443805	1518.25	-0.379962	0.704027	1	0.971787
met33935	0.00959049	0.0248781	1612.2	0.385499	0.699919	1	0.971787
met35127	-0.0355517	0.0914875	1778.71	-0.388597	0.697621	1	0.971787
met47154	0.0448754	0.117903	1804.91	0.380614	0.703534	1	0.971787
met57482	0.0517318	0.129033	1828.25	0.400917	0.688528	1	0.971787
met46982	-0.00590817	0.0148961	1568.18	-0.396625	0.691698	1	0.971787
met46683	0.0223388	0.0579817	1691.96	0.385273	0.700084	1	0.971787
met46689	-0.0117804	0.0296094	1546.56	-0.397861	0.690787	1	0.971787
met49517	0.00952602	0.0251282	1731.1	0.379098	0.704662	1	0.971787
met52669	-0.0224461	0.063611	1806.28	-0.352866	0.72423	1	0.972847
met43400	0.0139253	0.0378012	1647.19	0.368382	0.712636	1	0.972847
met39598	0.00331226	0.00906087	1585.24	0.365557	0.714745	1	0.972847
met1561	0.0501663	0.135088	1680.72	0.371359	0.710417	1	0.972847
met43378	0.0183928	0.0518159	1468.58	0.354964	0.722667	1	0.972847
met46633	-0.0296094	0.0828694	1722.43	-0.357302	0.72091	1	0.972847
met47787	-0.0123798	0.0350141	1546.85	-0.353566	0.723712	1	0.972847
met46709	0.0119185	0.0325357	1767.29	0.36632	0.71417	1	0.972847
met46455	-0.00646542	0.017848	1631.75	-0.36225	0.717212	1	0.972847
met46904	-0.0118798	0.0330517	1537.36	-0.35943	0.719323	1	0.972847
met52135	-0.0310685	0.0865599	1478.08	-0.358926	0.719702	1	0.972847
met52879	-0.00815533	0.0219723	1612.32	-0.371163	0.710565	1	0.972847
met41220	-0.031678	0.0915023	1473.69	-0.346198	0.729243	1	0.973354
met52925	0.00992687	0.0285506	1617.43	0.347694	0.728115	1	0.973354
met52773	0.0104286	0.0300677	1774.89	0.346836	0.728756	1	0.973354
met44621	-0.0165132	0.0485803	1646.78	-0.339914	0.733964	1	0.973468
met57554	-0.0532672	0.156069	1713.12	-0.341306	0.732915	1	0.973468
met32827	-0.0106471	0.0311057	1820.48	-0.342287	0.732174	1	0.973468
met1110	-0.0321637	0.0963879	1569.05	-0.33369	0.738658	1	0.977635
met20693	0.0181827	0.0548865	1735.87	0.331277	0.740475	1	0.977986
met36602	0.0132542	0.0416579	1427.26	0.318168	0.750404	1	0.978345
met43266	-0.00747134	0.0236017	1675.98	-0.316559	0.751617	1	0.978345
met48728	-0.00327064	0.0103063	1338.15	-0.317343	0.751033	1	0.978345
met44656	0.0149873	0.0464076	1363.22	0.322949	0.746783	1	0.978345
met54979	0.0343759	0.107378	1826.32	0.320139	0.748899	1	0.978345
met33132	0.0682955	0.207957	1855.54	0.328412	0.742637	1	0.978345
met52297	-0.00615601	0.0193793	1577.26	-0.31766	0.750785	1	0.978345
met52447	-0.0327663	0.105442	1831.88	-0.310752	0.756025	1	0.982053
met35436	-0.00742202	0.0243353	1667.69	-0.30499	0.760412	1	0.985719
met57814	-0.0137709	0.0469629	1529.8	-0.29323	0.769386	1	0.985744
met35675	-0.038394	0.13211	1381.29	-0.290622	0.771384	1	0.985744
met3155	0.0177145	0.0591593	1804.43	0.299437	0.764641	1	0.985744
met33941	0.0184927	0.0630324	1798.04	0.293384	0.769263	1	0.985744
met396	-0.0105973	0.0363414	1682.55	-0.291603	0.770626	1	0.985744
met46599	-0.0148405	0.0496932	1839.79	-0.298642	0.765247	1	0.985744
met47011	-0.00615102	0.020925	1485.54	-0.293956	0.768833	1	0.985744
met33230	-0.0328501	0.116732	1754.53	-0.281415	0.778425	1	0.989055
met32489	-0.021265	0.0746704	1412.52	-0.284784	0.775851	1	0.989055
met46594	-0.0262754	0.0934813	1772.92	-0.281076	0.778685	1	0.989055
met53261	-0.0138466	0.0502363	1611.58	-0.275629	0.782869	1	0.992369
met52533	0.0117447	0.0436211	1668.55	0.269244	0.787775	1	0.996583
met20675	-0.000937263	0.0818597	1805.44	-0.0114496	0.990866	1	0.996808
met52477	0.0146424	0.0706575	1336.14	0.207231	0.835861	1	0.996808
met33228	0.0243541	0.121074	1835.02	0.201151	0.840603	1	0.996808
met49617	-0.00606846	0.101587	1734.41	-0.0597369	0.952372	1	0.996808
met52710	0.029559	0.131601	1551.75	0.22461	0.822312	1	0.996808
met27447	-0.000552878	0.0555581	1387.6	-0.00995134	0.992062	1	0.996808
met52462	0.0234849	0.20504	1851.78	0.114538	0.908824	1	0.996808
met52454	0.0563072	0.220626	1725.32	0.255215	0.798587	1	0.996808
met52610	-0.00955056	0.1462	1842.95	-0.0653254	0.947922	1	0.996808
met52450	-0.00304863	0.0676583	1708.17	-0.0450593	0.964065	1	0.996808
met42450	-0.020483	0.221738	1833.05	-0.0923747	0.92641	1	0.996808
met52468	-0.00168258	0.10326	1816.48	-0.0162947	0.987001	1	0.996808
met19324	-0.0135908	0.0629828	1470.46	-0.215786	0.829185	1	0.996808
met38168	0.00808731	0.0442343	1733.2	0.182829	0.854954	1	0.996808
met57655	-0.0152088	0.0570302	1417.2	-0.26668	0.789754	1	0.996808
met36746	0.0127247	0.0844652	1768.69	0.150651	0.880268	1	0.996808
met33161	-0.000193931	0.00922143	1525.61	-0.0210304	0.983224	1	0.996808
met45721	-0.00119666	0.00881063	1551.04	-0.13582	0.891981	1	0.996808
met52984	-0.0128736	0.0651154	1737.07	-0.197704	0.8433	1	0.996808
met32457	0.00715748	0.0619549	1579.3	0.115527	0.908042	1	0.996808
met61843	-0.00254967	0.0504142	1432.1	-0.0505744	0.959672	1	0.996808
met12017	-0.0166345	0.10019	1364.92	-0.166029	0.868158	1	0.996808
met54809	-0.000985403	0.0171786	1412.71	-0.0573624	0.954265	1	0.996808
met15681	0.00503224	0.0438537	1750.9	0.114751	0.908656	1	0.996808
met35527	-0.0112921	0.047672	1578.7	-0.236871	0.812787	1	0.996808
met35136	-0.0237743	0.12947	1458.36	-0.183628	0.854331	1	0.996808
met37190	-0.00678983	0.0360975	1827.53	-0.188097	0.850821	1	0.996808
met37198	0.00777758	0.0339629	1728.3	0.229002	0.818894	1	0.996808
met36776	-0.018291	0.123872	1738.65	-0.147661	0.882628	1	0.996808
met33937	0.00591418	0.0843394	1857.82	0.0701236	0.944103	1	0.996808
met37202	-0.01039	0.0506886	1807.74	-0.204977	0.837613	1	0.996808
met37203	-0.00595481	0.0540831	1806.77	-0.110105	0.912339	1	0.996808
met57461	0.0186931	0.0747433	1640.42	0.250098	0.802543	1	0.996808
met48492	0.00349793	0.162283	1500.74	0.0215546	0.982806	1	0.996808
met32492	-0.00215501	0.0348508	1349.52	-0.0618353	0.950703	1	0.996808
met57443	0.00978151	0.121094	1792.15	0.080776	0.935629	1	0.996808
met1563	0.00421938	0.0221106	1585.32	0.190831	0.848683	1	0.996808
met1769	-0.00400711	0.088716	1405.57	-0.0451679	0.96398	1	0.996808
met32425	0.0109907	0.0601076	1682.39	0.182851	0.854937	1	0.996808
met36747	-0.0175804	0.193629	1831.51	-0.0907947	0.927666	1	0.996808
met53262	-0.00219371	0.030283	1490.63	-0.0724402	0.942261	1	0.996808
met601	0.00944501	0.0662247	1525.63	0.142621	0.886609	1	0.996808
met39837	0.00655253	0.0626058	1428.31	0.104663	0.916658	1	0.996808
met39831	0.00646725	0.0681326	1470.84	0.0949215	0.92439	1	0.996808
met53258	0.000955651	0.0265135	1589.52	0.036044	0.971252	1	0.996808
met47112	-0.00522518	0.0319121	1765.01	-0.163737	0.869957	1	0.996808
met44876	0.00650691	0.0569817	1672.86	0.114193	0.909099	1	0.996808
met42381	0.000547605	0.0298157	1696.87	0.0183663	0.985349	1	0.996808
met36738	0.00282076	0.0671775	1457.8	0.0419897	0.966513	1	0.996808
met18245	-0.0161617	0.146678	1593.4	-0.110184	0.912277	1	0.996808
met18369	-0.00723797	0.124973	1433.38	-0.0579164	0.953823	1	0.996808
met2734	0.0065276	0.103673	1567.13	0.0629634	0.949804	1	0.996808
met43829	-0.0205108	0.0842238	1648.23	-0.243527	0.807628	1	0.996808
met48152	0.0485231	0.282377	1753.87	0.171838	0.863585	1	0.996808
met44664	-0.00385157	0.0949744	1828.06	-0.0405537	0.967656	1	0.996808
met1572	-0.0293398	0.11669	1710.27	-0.251433	0.801509	1	0.996808
met57741	-0.0111585	0.0890556	1851.44	-0.125299	0.900301	1	0.996808
met57595	0.0101195	0.127574	1847.78	0.079323	0.936784	1	0.996808
met57421	-0.0160211	0.119712	1840.93	-0.13383	0.893551	1	0.996808
met52234	0.020671	0.0936509	1650.34	0.220724	0.825335	1	0.996808
met34407	-0.00649602	0.0857032	1709.54	-0.0757967	0.93959	1	0.996808
met57422	-0.0029658	0.068075	1626.67	-0.0435667	0.965255	1	0.996808
met57330	0.0303453	0.144038	1766.28	0.210676	0.833164	1	0.996808
met57463	0.00673007	0.048684	1576.77	0.13824	0.890068	1	0.996808
met1303	-0.0280646	0.179017	1816.6	-0.15677	0.875443	1	0.996808
met57365	0.0232863	0.123756	1746.04	0.188164	0.85077	1	0.996808
met57407	-0.00516445	0.022102	1766.34	-0.233664	0.815273	1	0.996808
met22185	-0.0352743	0.200813	1576.12	-0.175657	0.860586	1	0.996808
met43488	0.00523112	0.0940796	1855	0.0556031	0.955664	1	0.996808
met48434	0.00507884	0.0279159	1825.3	0.181933	0.855655	1	0.996808
met27710	0.00558573	0.0729541	1797.4	0.0765651	0.938978	1	0.996808
met33967	0.00976474	0.0600199	1398.75	0.162692	0.870785	1	0.996808
met1587	-0.0117382	0.0586014	1607.74	-0.200306	0.841266	1	0.996808
met1498	-0.00622581	0.0847243	1492.9	-0.0734831	0.941432	1	0.996808
met61867	-0.00592769	0.0597113	1730.24	-0.0992724	0.920933	1	0.996808
met20694	0.00441384	0.0915755	1732.64	0.0481989	0.961563	1	0.996808
met52634	0.00258531	0.035912	1644.8	0.07199	0.942619	1	0.996808
met52944	-0.0122474	0.0498051	1560.39	-0.245906	0.805788	1	0.996808
met566	0.0113175	0.0647165	1521.59	0.174879	0.861198	1	0.996808
met1444	-0.0010718	0.0552698	1502.65	-0.0193922	0.984531	1	0.996808
met32562	-0.00310245	0.0536203	1842.72	-0.0578596	0.953867	1	0.996808
met61858	-0.00374006	0.0725052	1655.46	-0.0515834	0.958867	1	0.996808
met42382	-0.00727264	0.0399113	1745.26	-0.18222	0.855431	1	0.996808
met57476	0.000955679	0.0837649	1792.91	0.0114091	0.990898	1	0.996808
met48491	0.00652366	0.183366	1856.11	0.0355772	0.971623	1	0.996808
met52495	-0.00225379	0.116945	1725.41	-0.0192722	0.984626	1	0.996808
met57477	0.0116549	0.132994	1817.47	0.0876349	0.930177	1	0.996808
met52435	0.0180062	0.129921	1717.39	0.138594	0.889788	1	0.996808
met52437	0.0171322	0.20336	1826.14	0.084246	0.93287	1	0.996808
met57479	0.0252926	0.127518	1852.33	0.198346	0.842796	1	0.996808
met38625	-0.0073191	0.0995821	1615.79	-0.0734981	0.941419	1	0.996808
met57464	0.00732605	0.0384403	1539.77	0.190583	0.848878	1	0.996808
met41888	-0.00140306	0.0226578	1489.86	-0.0619239	0.950632	1	0.996808
met18494	0.00560975	0.0223482	1641.73	0.251015	0.801834	1	0.996808
met27738	-0.00430742	0.0747705	1606.39	-0.0576085	0.954068	1	0.996808
met36095	0.0029935	0.0128362	1471.74	0.233207	0.815633	1	0.996808
met32306	-0.009732	0.0868529	1398.13	-0.112052	0.910799	1	0.996808
met1299	0.0428992	0.204202	1787.58	0.210083	0.833627	1	0.996808
met605	0.00729608	0.0450771	1460.17	0.161858	0.87144	1	0.996808
met3147	0.0119822	0.0984712	1784.27	0.121682	0.903165	1	0.996808
met46595	-0.00745458	0.0331803	1574.86	-0.224668	0.822266	1	0.996808
met47652	0.00534728	0.0329098	1705.81	0.162483	0.870945	1	0.996808
met46616	-0.00270615	0.0575701	1722.76	-0.0470062	0.962514	1	0.996808
met46618	-0.00823197	0.0652637	1647.98	-0.126134	0.899641	1	0.996808
met46623	-0.00271004	0.0283522	1678.46	-0.0955849	0.923862	1	0.996808
met46997	-0.00372452	0.0358993	1703.4	-0.103749	0.917381	1	0.996808
met46639	-0.00266722	0.0197656	1759.93	-0.134942	0.892673	1	0.996808
met46646	0.00531085	0.0246985	1523.52	0.215027	0.829775	1	0.996808
met46655	0.00516271	0.0213846	1603.43	0.241422	0.809259	1	0.996808
met47988	-0.00302081	0.0305485	1568.25	-0.0988857	0.921242	1	0.996808
met47013	0.00772266	0.052047	1691.87	0.148379	0.882062	1	0.996808
met46681	0.00792672	0.0413062	1817.64	0.191901	0.847841	1	0.996808
met40097	0.00363516	0.15766	1811.89	0.023057	0.981607	1	0.996808
met47301	-0.00799207	0.0320565	1686.11	-0.249312	0.80315	1	0.996808
met48772	0.000924536	0.0227042	1832.38	0.0407209	0.967523	1	0.996808
met46384	0.00152907	0.0675283	1849.46	0.0226435	0.981937	1	0.996808
met46503	0.00302414	0.0233679	1753.69	0.129414	0.897045	1	0.996808
met46515	0.00142743	0.0312335	1827.09	0.0457018	0.963553	1	0.996808
met46968	-0.000891041	0.0436455	1852.88	-0.0204154	0.983714	1	0.996808
met47783	0.00112013	0.034373	1780.47	0.0325875	0.974007	1	0.996808
met48992	0.0114523	0.053398	1698.58	0.214471	0.830206	1	0.996808
met49542	-0.00159024	0.034839	1760.51	-0.0456455	0.963598	1	0.996808
met52502	-0.00258434	0.0583073	1053.33	-0.0443228	0.964655	1	0.996808
met52640	-0.000276448	0.0269047	1618.36	-0.0102751	0.991803	1	0.996808
met52835	-0.00590626	0.0495681	1531.99	-0.119155	0.905169	1	0.996808
met52867	-0.00313908	0.0250591	1818.01	-0.125267	0.900326	1	0.996808
met52873	-0.00663256	0.0263446	1464.96	-0.251762	0.801261	1	0.996808
met54837	0.0029971	0.0305676	1411.69	0.0980483	0.921908	1	0.996808
met54977	-0.00749503	0.16563	1847.34	-0.0452518	0.963912	1	0.996808
met1284	-0.00135251	0.170883	1760.85	-0.00791481	0.993686	1	0.99685
met1638	0.000629622	0.185792	1828.75	0.00338885	0.997296	1	0.998882
met52916	-2.69209e-05	0.0340362	1808.47	-0.000790948	0.999369	1	0.999369

## Sheet: Plasma-DEL
Supplementary Table S3. Associations between metabolites and cognitive function. Each linear mixed model included a random intercept for family and individual and a random slope for age.
The outcome was a cognitive function and metabolite, smoking status, sex, race, education level, practice effect.
COMP.ID	Estimate	Std..Error	df	t.value	Pr...t..	Bon	FDR
met32198	0.343781	0.116808	1539.03	2.94313	0.00329775	1	0.336111
met12129	0.323525	0.111661	1638.98	2.89738	0.00381293	1	0.336111
met33441	0.208698	0.0715228	1789.25	2.91793	0.00356763	1	0.336111
met37432	-0.190652	0.0665985	1292.82	-2.86271	0.00426807	1	0.336111
met32452	0.375036	0.120472	1751.67	3.11305	0.00188156	1	0.336111
met46640	0.219582	0.069902	1767.23	3.14129	0.00170992	1	0.336111
met47773	0.0594271	0.0193658	1663.16	3.06867	0.0021849	1	0.336111
met52286	0.134376	0.0460739	1433.26	2.91654	0.00359446	1	0.336111
met15500	0.578743	0.209163	1767.55	2.76695	0.00571727	1	0.400209
met46607	0.0464128	0.0170141	1617.66	2.7279	0.00644286	1	0.4059
met32377	-0.331283	0.123567	1641.92	-2.681	0.00741372	1	0.424604
met18349	0.283886	0.112302	1723.6	2.52787	0.0115642	1	0.607123
met32197	0.290556	0.116788	1785.49	2.48789	0.012941	1	0.627141
met34409	0.285932	0.116372	1725.67	2.45705	0.014106	1	0.634769
met1604	0.457561	0.189255	1853.83	2.4177	0.0157148	1	0.660021
met43802	-0.326635	0.136465	1829.15	-2.39353	0.0167872	1	0.660995
met52465	-0.135265	0.0709965	1823.56	-1.90524	0.0569059	1	0.73861
met52438	-0.22873	0.118327	1498.93	-1.93303	0.0534204	1	0.73861
met32397	0.223012	0.110433	1650.03	2.01943	0.0436039	1	0.73861
met1549	0.172316	0.0788609	1541.3	2.18506	0.0290347	1	0.73861
met44526	0.417862	0.18069	1689.26	2.31259	0.0208651	1	0.73861
met36098	-0.0613604	0.0301904	1453.2	-2.03245	0.0422895	1	0.73861
met61769	0.160731	0.0786753	1681.59	2.04297	0.0412108	1	0.73861
met37187	0.0477409	0.0223049	1723.63	2.14038	0.0324639	1	0.73861
met22132	0.197111	0.102188	1578.21	1.92891	0.0539209	1	0.73861
met37207	0.0921989	0.040779	1855.43	2.26094	0.0238784	1	0.73861
met57513	0.161265	0.0753285	1676.53	2.14083	0.0324315	1	0.73861
met57635	0.153865	0.080693	1824.04	1.90679	0.0567049	1	0.73861
met38637	0.0292789	0.0136172	1719.88	2.15013	0.0316838	1	0.73861
met1564	0.526419	0.261618	1666.21	2.01217	0.0443628	1	0.73861
met48728	-0.0220171	0.0102764	1304.44	-2.14249	0.0323387	1	0.73861
met36747	0.397385	0.19524	1830.38	2.03537	0.0419577	1	0.73861
met31912	0.0494616	0.0257523	1590.45	1.92067	0.0549521	1	0.73861
met53013	0.273194	0.132072	1786.81	2.06852	0.0387344	1	0.73861
met15716	0.251346	0.123157	1765.61	2.04085	0.0414139	1	0.73861
met57511	0.201524	0.100565	1692.75	2.00391	0.0452391	1	0.73861
met57745	0.0554719	0.0286175	1651.31	1.93839	0.052746	1	0.73861
met64	0.640826	0.304982	1713.57	2.10119	0.0357699	1	0.73861
met22130	0.221924	0.115557	1815.58	1.92048	0.0549539	1	0.73861
met1648	0.3815	0.195906	1835.03	1.94736	0.0516441	1	0.73861
met36850	0.0727857	0.0316003	1593.35	2.30332	0.0213891	1	0.73861
met1649	0.413992	0.200241	1658	2.06747	0.0388444	1	0.73861
met46459	0.0400029	0.0203536	1454.73	1.9654	0.0495579	1	0.73861
met46601	0.12489	0.0569029	1778.06	2.19479	0.0283079	1	0.73861
met46738	0.245477	0.11993	1696.25	2.04683	0.0408289	1	0.73861
met46911	0.0304732	0.0156249	1657.98	1.9503	0.0513088	1	0.73861
met48989	-0.0391437	0.0205872	1488.35	-1.90136	0.0574474	1	0.73861
met52483	0.202197	0.0933996	1692.34	2.16486	0.0305379	1	0.73861
met52909	0.200605	0.0949537	1761.03	2.11266	0.0347699	1	0.73861
met1566	0.147353	0.0890274	1825.32	1.65514	0.0980675	1	0.776529
met22116	0.264079	0.161256	1738.89	1.63763	0.101679	1	0.776529
met53242	0.188032	0.105896	1722.97	1.77563	0.07597	1	0.776529
met48885	-0.253457	0.146732	1792.13	-1.72735	0.0842767	1	0.776529
met57636	0.120734	0.0707324	1754.32	1.70691	0.0880158	1	0.776529
met57516	0.189874	0.114652	1844.96	1.6561	0.0978721	1	0.776529
met38178	0.134931	0.0773578	1799.77	1.74425	0.0812864	1	0.776529
met35159	0.072993	0.0441836	1735.65	1.65204	0.0987073	1	0.776529
met62103	0.194576	0.114491	1241.5	1.69949	0.0894766	1	0.776529
met57520	0.126414	0.0726316	1555.09	1.74048	0.081973	1	0.776529
met2734	0.177108	0.103913	1531.06	1.70439	0.0885117	1	0.776529
met62061	-0.018189	0.0109598	1289.12	-1.65961	0.0972353	1	0.776529
met32328	0.136922	0.0789071	1818.71	1.73524	0.0828685	1	0.776529
met40730	-0.0818412	0.0492925	1671.33	-1.66032	0.0970382	1	0.776529
met34407	0.141245	0.0859684	1676.03	1.64298	0.100574	1	0.776529
met527	-0.237549	0.128081	1732.24	-1.85468	0.063812	1	0.776529
met57512	0.144999	0.0792025	1721.04	1.83074	0.0673125	1	0.776529
met57807	0.0414202	0.0246655	1514.05	1.67928	0.0933042	1	0.776529
met33936	0.114162	0.0674553	1832.84	1.69241	0.0907375	1	0.776529
met44681	0.240012	0.136598	1740.16	1.75708	0.0790807	1	0.776529
met57483	0.211933	0.125289	1852.81	1.69156	0.0908985	1	0.776529
met12261	0.0403298	0.0223018	1661.45	1.80836	0.0707306	1	0.776529
met42593	0.0614947	0.0331451	1561.25	1.85532	0.0637391	1	0.776529
met46997	0.0633429	0.036008	1667.9	1.75913	0.0787384	1	0.776529
met46634	0.0912951	0.0519121	1734.45	1.75865	0.078814	1	0.776529
met47977	0.0372362	0.0228614	1769.56	1.62878	0.103537	1	0.776529
met47800	0.171075	0.0995495	1618.64	1.7185	0.0858975	1	0.776529
met40097	0.27226	0.158988	1804.28	1.71246	0.0869845	1	0.776529
met46690	0.058589	0.0329326	1685.7	1.77906	0.0754102	1	0.776529
met46261	0.0829957	0.0472337	1458.59	1.75713	0.0791053	1	0.776529
met46295	0.0997109	0.0610667	1747.51	1.63282	0.102687	1	0.776529
met46493	0.107292	0.05805	1794.68	1.84826	0.0647291	1	0.776529
met49463	0.0526908	0.0300963	1494.97	1.75074	0.0801958	1	0.776529
met49557	0.126781	0.0721659	1784.17	1.7568	0.0791238	1	0.776529
met54873	-0.0403459	0.0247141	1607.02	-1.6325	0.10277	1	0.776529
met48757	0.0470576	0.0293616	1733.58	1.6027	0.109184	1	0.799837
met52647	0.0555669	0.034565	1833.53	1.60761	0.108094	1	0.799837
met1505	-0.168049	0.105558	1805.18	-1.59201	0.111557	1	0.80783
met35101	0.0111157	0.00702146	1415.55	1.5831	0.113622	1	0.813432
met57718	-0.0820886	0.0523353	1710.06	-1.56851	0.116946	1	0.827823
met53176	0.0539183	0.0367788	1470.71	1.46602	0.142858	1	0.833582
met47135	0.0436522	0.0284032	1772.59	1.53687	0.124503	1	0.833582
met34365	-0.0169161	0.0108601	1405.5	-1.55764	0.119545	1	0.833582
met57528	0.0542425	0.0355511	1732.56	1.52576	0.127252	1	0.833582
met43807	0.16909	0.114151	1812.86	1.48128	0.138706	1	0.833582
met43333	0.0126674	0.00879403	1583.74	1.44045	0.149937	1	0.833582
met18368	0.0750356	0.0496874	1770.57	1.51015	0.131183	1	0.833582
met587	-0.165453	0.114542	1672.91	-1.44448	0.148791	1	0.833582
met62066	0.035738	0.0240093	1668.37	1.48851	0.136806	1	0.833582
met22137	0.158076	0.103007	1828.72	1.53462	0.125051	1	0.833582
met1417	0.149631	0.103808	1786.9	1.44142	0.149641	1	0.833582
met60	0.388454	0.257218	1735.3	1.51021	0.131171	1	0.833582
met37059	-0.0454516	0.0312718	1502.05	-1.45344	0.146311	1	0.833582
met61873	-0.0173008	0.0115401	1472.2	-1.49919	0.13404	1	0.833582
met45404	0.0114054	0.00762681	1372.28	1.49543	0.135031	1	0.833582
met43488	0.137182	0.0948266	1845.09	1.44666	0.148162	1	0.833582
met37252	-0.0325321	0.0227618	1765.86	-1.42924	0.153112	1	0.833582
met57564	-0.0954122	0.0650763	1518.22	-1.46616	0.142812	1	0.833582
met1516	-0.199063	0.139034	1299.69	-1.43175	0.152455	1	0.833582
met37058	-0.204223	0.138731	1845.03	-1.47208	0.141169	1	0.833582
met54	0.319649	0.207872	1576.96	1.53772	0.124317	1	0.833582
met46600	0.0377895	0.0260266	1501.53	1.45196	0.146722	1	0.833582
met47654	0.0205504	0.0138908	1493.62	1.47942	0.139238	1	0.833582
met46616	0.0825729	0.0578253	1689.89	1.42797	0.153485	1	0.833582
met46519	0.0321938	0.0212261	1465.26	1.51671	0.129557	1	0.833582
met46905	0.0777912	0.0507929	1623.09	1.53154	0.125831	1	0.833582
met47016	0.0271355	0.018654	1648.74	1.45467	0.14595	1	0.833582
met38125	0.0423241	0.0298444	1450.95	1.41816	0.156359	1	0.841935
met45951	-0.0928899	0.0695716	1642.29	-1.33517	0.182006	1	0.844832
met52470	-0.121158	0.0859076	1757.64	-1.41033	0.158618	1	0.844832
met35631	-0.154659	0.114696	1694.32	-1.34843	0.177701	1	0.844832
met52466	-0.0845059	0.0614364	1816.81	-1.3755	0.169146	1	0.844832
met57554	0.21435	0.156592	1680.39	1.36884	0.171232	1	0.844832
met52984	0.0900608	0.0653473	1704.37	1.37819	0.168326	1	0.844832
met32457	0.0854631	0.0620288	1540.44	1.3778	0.168466	1	0.844832
met15676	0.228361	0.164262	1764.7	1.39023	0.164635	1	0.844832
met48569	-0.00960282	0.00712026	1472.21	-1.34866	0.177653	1	0.844832
met443	0.146354	0.107777	1502.83	1.35793	0.174688	1	0.844832
met43493	0.0607835	0.0437399	1600.59	1.38966	0.164825	1	0.844832
met46223	0.163678	0.123451	1775.24	1.32585	0.185058	1	0.844832
met44878	-0.136034	0.102459	1853.66	-1.32769	0.184446	1	0.844832
met48429	0.0213674	0.0159674	1627.82	1.33819	0.18102	1	0.844832
met27710	0.0978453	0.0734696	1779.6	1.33178	0.183103	1	0.844832
met48460	0.0102243	0.00767091	1514.9	1.33286	0.182778	1	0.844832
met18392	0.0339169	0.0249313	1547.85	1.36041	0.173897	1	0.844832
met46390	-0.127371	0.0919379	1729.39	-1.3854	0.166108	1	0.844832
met46490	-0.0337066	0.0243013	1529.26	-1.38703	0.165634	1	0.844832
met46388	0.109885	0.0805872	1666.4	1.36355	0.172892	1	0.844832
met52524	0.0742309	0.0542122	1797.82	1.36927	0.171087	1	0.844832
met36808	0.21656	0.166138	1711.38	1.30349	0.192581	1	0.846566
met1898	0.200482	0.153125	1790.32	1.30927	0.19061	1	0.846566
met61836	-0.0410365	0.031719	1535.05	-1.29375	0.195946	1	0.846566
met61848	-0.042288	0.0320873	1417.52	-1.31791	0.187748	1	0.846566
met46914	0.0851758	0.0654775	1733.33	1.30084	0.193486	1	0.846566
met48009	-0.0820744	0.0634747	1610.36	-1.29302	0.196188	1	0.846566
met46902	0.0452688	0.0346604	1653.58	1.30607	0.191711	1	0.846566
met52790	0.0342307	0.0263652	1495.42	1.29833	0.194375	1	0.846566
met52773	0.0388261	0.030244	1748.18	1.28376	0.199395	1	0.854552
met53266	0.0243987	0.0190968	1612.09	1.27764	0.201562	1	0.858
met52461	-0.242493	0.197962	1671.68	-1.22495	0.220767	1	0.858642
met15685	0.0694692	0.0553991	1789.51	1.25398	0.210013	1	0.858642
met40473	0.0755584	0.0610243	1658.52	1.23817	0.215829	1	0.858642
met15140	0.195216	0.15573	1792.02	1.25356	0.210167	1	0.858642
met36103	0.0575144	0.0452248	1662.23	1.27174	0.203642	1	0.858642
met52434	0.220933	0.178853	1819.54	1.23527	0.216889	1	0.858642
met52633	0.0409083	0.0323528	1654.74	1.26444	0.206249	1	0.858642
met46225	-0.102899	0.0823182	1759.96	-1.25002	0.21146	1	0.858642
met46443	0.0543861	0.0443252	1808.75	1.22698	0.21999	1	0.858642
met46588	0.0591964	0.0483291	1749.42	1.22486	0.220794	1	0.858642
met47909	0.0499154	0.0397457	1569.62	1.25587	0.20935	1	0.858642
met46646	0.0307798	0.024725	1488.35	1.24489	0.213369	1	0.858642
met46655	0.0270144	0.0214677	1568.2	1.25837	0.208444	1	0.858642
met54704	-0.179484	0.145308	1754.53	-1.2352	0.21692	1	0.858642
met38165	0.183655	0.150906	1679.83	1.21702	0.223769	1	0.8596
met46610	-0.0310599	0.0254577	1468.55	-1.22006	0.222638	1	0.8596
met44621	-0.0577934	0.0487058	1608.48	-1.18658	0.235567	1	0.862834
met52690	0.0406092	0.0337641	1628.33	1.20274	0.229253	1	0.862834
met52697	-0.162034	0.136335	1755.86	-1.1885	0.234798	1	0.862834
met33968	0.0740255	0.0618434	1636.92	1.19698	0.231486	1	0.862834
met40703	-0.0410697	0.0341769	1426.73	-1.20168	0.229686	1	0.862834
met46603	0.0776794	0.0653657	1747.76	1.18838	0.234845	1	0.862834
met46618	0.0781901	0.0655458	1609.88	1.19291	0.233082	1	0.862834
met46517	0.0731289	0.0608629	1818.5	1.20153	0.2297	1	0.862834
met57473	0.100789	0.0855321	1750.36	1.17837	0.238807	1	0.869645
met44872	0.151519	0.129539	1459.18	1.16967	0.242323	1	0.870316
met32619	0.0747453	0.0642062	1825.77	1.16415	0.244517	1	0.870316
met33140	0.0666355	0.056882	1681.64	1.17147	0.241576	1	0.870316
met46666	0.0210147	0.0180216	1626.07	1.16608	0.243751	1	0.870316
met44877	0.168653	0.145695	1624.9	1.15758	0.247205	1	0.874937
met52452	0.277776	0.24346	1679.29	1.14095	0.254052	1	0.877338
met47031	-0.0100011	0.00877975	1459.15	-1.13911	0.254845	1	0.877338
met48442	-0.00877059	0.00769938	1389.03	-1.13913	0.254846	1	0.877338
met2137	0.0964765	0.0840296	1794.27	1.14813	0.25107	1	0.877338
met46360	0.049218	0.0429262	1810.78	1.14657	0.25171	1	0.877338
met48255	-0.130441	0.116641	1725.82	-1.11832	0.263586	1	0.881083
met54955	-0.0304686	0.027012	1428.14	-1.12797	0.259523	1	0.881083
met53260	-0.0496878	0.0444309	1480.94	-1.11831	0.263614	1	0.881083
met17769	0.045964	0.0411652	1801.18	1.11658	0.264325	1	0.881083
met46486	0.0392679	0.0350832	1833.21	1.11928	0.263168	1	0.881083
met52835	0.0558076	0.0495893	1493.96	1.1254	0.260602	1	0.881083
met52025	0.0350095	0.0314475	1528.69	1.11327	0.265768	1	0.881229
met33941	0.07026	0.0634613	1774.85	1.10713	0.268387	1	0.885257
met20675	0.0869286	0.0825854	1801.92	1.05259	0.29267	1	0.88917
met52682	0.13159	0.136134	1846.5	0.966617	0.333862	1	0.88917
met52475	0.111477	0.102615	1757.48	1.08636	0.277469	1	0.88917
met52748	0.111337	0.105545	1698.42	1.05487	0.291633	1	0.88917
met35628	-0.0936029	0.0880118	1547.81	-1.06353	0.287709	1	0.88917
met38768	0.0348642	0.0354153	1526.45	0.984439	0.325056	1	0.88917
met12032	-0.0087733	0.00856043	1470.15	-1.02487	0.305595	1	0.88917
met46146	0.0404129	0.0416785	1531.69	0.969635	0.332382	1	0.88917
met35114	-0.206067	0.207991	1808.5	-0.990748	0.321941	1	0.88917
met47120	0.0500433	0.0484701	1481.85	1.03246	0.302026	1	0.88917
met3141	0.173305	0.175971	1766.59	0.98485	0.324833	1	0.88917
met33949	-0.110114	0.107269	1736.8	-1.02652	0.304792	1	0.88917
met57	0.0818341	0.0835586	1726.48	0.979362	0.327538	1	0.88917
met52983	0.0304479	0.0291769	1696.28	1.04356	0.296837	1	0.88917
met57658	-0.023092	0.0218619	1836.03	-1.05627	0.290985	1	0.88917
met1125	0.240925	0.235633	1700.95	1.02246	0.306708	1	0.88917
met48153	0.170744	0.159703	1693.57	1.06913	0.285162	1	0.88917
met32418	0.0678386	0.0620067	1619.79	1.09405	0.274094	1	0.88917
met57365	0.12324	0.124386	1718.75	0.990786	0.32193	1	0.88917
met33967	0.0579244	0.0599417	1370.17	0.966346	0.334042	1	0.88917
met33959	0.0735366	0.0702625	1688.4	1.0466	0.295435	1	0.88917
met57687	0.095823	0.0972287	1841.51	0.985543	0.324487	1	0.88917
met35126	0.0589339	0.0594011	1669.95	0.992134	0.321276	1	0.88917
met31932	0.0353191	0.0360758	1632.63	0.979026	0.327712	1	0.88917
met62152	0.0964278	0.089522	1638.82	1.07714	0.281576	1	0.88917
met42463	0.196702	0.199553	1851.4	0.98571	0.324404	1	0.88917
met57481	0.102661	0.0992923	1723.21	1.03393	0.301316	1	0.88917
met47154	0.125725	0.118608	1781.1	1.06	0.289287	1	0.88917
met42459	0.224165	0.227789	1836.84	0.984089	0.325202	1	0.88917
met15336	0.00984612	0.00897011	1328.85	1.09766	0.272553	1	0.88917
met2761	0.176146	0.168966	1825.55	1.04249	0.297323	1	0.88917
met52436	0.16458	0.152508	1702.14	1.07916	0.28067	1	0.88917
met57517	0.129893	0.118641	1841.3	1.09484	0.273729	1	0.88917
met46602	0.055314	0.0554934	1675.69	0.996766	0.319022	1	0.88917
met46623	-0.0283087	0.0284774	1645.21	-0.994078	0.320331	1	0.88917
met47439	-0.024903	0.0241725	1548.78	-1.03022	0.303066	1	0.88917
met46473	-0.0752902	0.0765656	1767.4	-0.983342	0.325574	1	0.88917
met46683	0.0563819	0.0582014	1658.28	0.968738	0.332817	1	0.88917
met46455	0.0181671	0.0178969	1594.54	1.01509	0.310216	1	0.88917
met46728	0.0219412	0.0227274	1506.05	0.965404	0.334497	1	0.88917
met47393	-0.0220928	0.0214386	1421.93	-1.03052	0.302942	1	0.88917
met49542	0.0369372	0.034971	1726.58	1.05622	0.291014	1	0.88917
met52871	-0.0220416	0.0214724	1500.83	-1.02651	0.304818	1	0.88917
met57714	0.0357968	0.034641	1831.98	1.03337	0.301569	1	0.88917
met57715	0.0669538	0.0686809	1835.63	0.974852	0.329762	1	0.88917
met57720	0.0260018	0.0256159	1801.47	1.01506	0.310212	1	0.88917
met46115	0.050742	0.0530574	1760.67	0.95636	0.339022	1	0.889381
met32492	0.0334886	0.0348882	1311.88	0.959883	0.337291	1	0.889381
met53262	-0.0289787	0.030316	1452.52	-0.955886	0.339289	1	0.889381
met52234	0.0896794	0.0940029	1615.1	0.954006	0.340223	1	0.889381
met42398	-0.112864	0.119546	1696.68	-0.944105	0.345251	1	0.889863
met43761	-0.0618114	0.0658403	1488.25	-0.938808	0.347982	1	0.889863
met37192	0.0269926	0.028399	1851.73	0.950477	0.341994	1	0.889863
met44656	0.0437114	0.046339	1335.71	0.943296	0.3457	1	0.889863
met52944	-0.0469097	0.0498891	1522.93	-0.94028	0.347223	1	0.889863
met2125	0.109405	0.116751	1360.21	0.937082	0.348883	1	0.889863
met48258	-0.149181	0.161402	1781.54	-0.924281	0.355465	1	0.890569
met42446	0.24833	0.273644	1679.57	0.907494	0.364276	1	0.890569
met36746	0.0765212	0.0849871	1743.73	0.900386	0.368039	1	0.890569
met48782	0.116151	0.126414	1509.57	0.918812	0.35834	1	0.890569
met57521	0.097736	0.10516	1844.55	0.929404	0.352802	1	0.890569
met33422	0.113337	0.123134	1522.64	0.920429	0.357494	1	0.890569
met1302	0.175919	0.18888	1487.5	0.93138	0.351808	1	0.890569
met48841	0.0225515	0.0251803	1655.08	0.895602	0.370596	1	0.890569
met52433	0.155322	0.171254	1848.92	0.906967	0.364542	1	0.890569
met33969	-0.0478129	0.0525882	1626.11	-0.909194	0.363382	1	0.890569
met1299	0.188059	0.205396	1761.28	0.915593	0.360006	1	0.890569
met46621	-0.0648636	0.0721348	1848.74	-0.8992	0.368663	1	0.890569
met46968	0.0394819	0.0440773	1853.42	0.895743	0.370506	1	0.890569
met49517	0.0226657	0.0252886	1706.2	0.89628	0.37023	1	0.890569
met52772	0.0383967	0.0429776	1542.69	0.89341	0.371777	1	0.890569
met54841	-0.113365	0.125602	1341.96	-0.902576	0.366913	1	0.890569
met1284	0.152372	0.171597	1728.12	0.887963	0.374684	1	0.894133
met52477	0.0603986	0.0706459	1301.79	0.854949	0.392737	1	0.895368
met52713	0.119417	0.137768	1819.93	0.866796	0.386168	1	0.895368
met52710	0.107838	0.131855	1511.21	0.817849	0.413572	1	0.895368
met53195	-0.0662873	0.077096	1720.83	-0.859802	0.390018	1	0.895368
met19258	-0.0540271	0.0660906	1581.65	-0.817469	0.413783	1	0.895368
met53209	-0.0247745	0.0301077	1815.53	-0.822862	0.410694	1	0.895368
met42449	-0.0642959	0.0797003	1820.87	-0.806721	0.419933	1	0.895368
met61868	0.0832854	0.103285	1799.8	0.806364	0.420139	1	0.895368
met52623	0.0829789	0.0956336	1680.38	0.867675	0.385696	1	0.895368
met45095	0.0481601	0.0560567	1336.4	0.859131	0.390422	1	0.895368
met61843	0.0406141	0.050405	1394.33	0.805755	0.420522	1	0.895368
met15736	-0.00540709	0.00679631	1463.17	-0.795592	0.426398	1	0.895368
met1494	0.170237	0.212992	1824.92	0.799264	0.424242	1	0.895368
met38321	0.039603	0.0479587	1614.91	0.825773	0.409055	1	0.895368
met57518	0.0769069	0.0950467	1828.58	0.809148	0.418535	1	0.895368
met53261	-0.0425905	0.0503607	1574.58	-0.84571	0.397843	1	0.895368
met27718	0.0841162	0.0986576	1855.77	0.852607	0.393987	1	0.895368
met22163	0.0942541	0.114163	956.307	0.825608	0.409232	1	0.895368
met18467	-0.0406411	0.0526608	1771.16	-0.771752	0.440364	1	0.895368
met57519	0.0842275	0.096011	1674	0.87727	0.380466	1	0.895368
met33973	0.0343013	0.044224	1653.8	0.775627	0.43808	1	0.895368
met44876	0.0448341	0.0572058	1638.38	0.783733	0.43331	1	0.895368
met37063	-0.0414537	0.0528552	1333.61	-0.784288	0.43301	1	0.895368
met15122	0.0662665	0.0767806	1418.83	0.863064	0.388248	1	0.895368
met61862	0.0436889	0.0498189	1536.65	0.876955	0.380648	1	0.895368
met590	0.0352058	0.0418815	1617.64	0.840603	0.400694	1	0.895368
met22185	0.153874	0.201342	1541.88	0.764239	0.444842	1	0.895368
met33950	-0.0632785	0.0811079	1809.61	-0.780176	0.435389	1	0.895368
met36845	-0.00596608	0.00719765	1482.69	-0.828892	0.407299	1	0.895368
met61865	0.048453	0.0611385	1724.95	0.792512	0.428171	1	0.895368
met53223	0.0718224	0.0889691	1733.44	0.807274	0.419619	1	0.895368
met38170	0.0311743	0.0379718	1857.82	0.820986	0.411759	1	0.895368
met18335	0.0156268	0.0195929	1752.93	0.797576	0.425225	1	0.895368
met37529	0.152921	0.175933	1802.24	0.869198	0.384855	1	0.895368
met47901	0.0174687	0.0210103	1490.88	0.831435	0.405861	1	0.895368
met47651	-0.0262098	0.0332754	1773.99	-0.787663	0.430999	1	0.895368
met46982	-0.0115692	0.0149476	1530.76	-0.773989	0.439057	1	0.895368
met47687	0.137712	0.174569	1841.26	0.78887	0.43029	1	0.895368
met46628	0.0257262	0.0325538	1589.06	0.790266	0.42949	1	0.895368
met46633	-0.0640376	0.0834397	1696.99	-0.767472	0.442908	1	0.895368
met46662	0.0607666	0.0725228	1712.83	0.837896	0.402206	1	0.895368
met47739	-0.0219496	0.0248362	1591.91	-0.883776	0.376951	1	0.895368
met48992	0.0412208	0.0536679	1665.47	0.768071	0.442554	1	0.895368
met49681	0.0618988	0.075637	1680.23	0.818367	0.413264	1	0.895368
met52640	-0.0223909	0.0269897	1583.96	-0.829608	0.406885	1	0.895368
met52865	0.0297396	0.0385148	1800.71	0.772159	0.440121	1	0.895368
met53114	-0.0573189	0.066024	1441.01	-0.868152	0.385455	1	0.895368
met54877	0.0504549	0.0646091	1705.95	0.780926	0.434954	1	0.895368
met54977	-0.128065	0.167387	1854.98	-0.765082	0.44432	1	0.895368
met15506	0.143985	0.190357	1667.65	0.756398	0.449517	1	0.899035
met47787	0.0265903	0.0350882	1513.17	0.757812	0.448681	1	0.899035
met46972	0.0706613	0.0939657	1382.97	0.75199	0.452185	1	0.901508
met39609	-0.0672449	0.0911206	1552.79	-0.737977	0.46064	1	0.912589
met32504	-0.0463501	0.0626132	1660.74	-0.74026	0.459247	1	0.912589
met43582	-0.0663383	0.0902861	1476.84	-0.734757	0.462604	1	0.913607
met52450	0.0489981	0.0680112	1676.03	0.720442	0.471353	1	0.918195
met37752	0.0348092	0.0482757	1348.49	0.721051	0.471003	1	0.918195
met17945	-0.0969278	0.136386	1338.53	-0.710686	0.477403	1	0.918195
met41220	-0.063746	0.0915247	1438.3	-0.69649	0.486235	1	0.918195
met15681	-0.0304016	0.0440567	1718.86	-0.690056	0.490252	1	0.918195
met37186	0.0191652	0.0277472	1852.98	0.690705	0.489837	1	0.918195
met37209	0.0388854	0.0566989	1640.94	0.685822	0.492922	1	0.918195
met512	0.177334	0.256489	1783.62	0.691392	0.489409	1	0.918195
met57331	0.0612566	0.0898619	1770.97	0.681675	0.495534	1	0.918195
met47886	0.0687734	0.100633	1815.2	0.683406	0.494438	1	0.918195
met1642	0.0560249	0.0809831	1611.41	0.69181	0.489157	1	0.918195
met46331	-0.00846538	0.0123297	1402.11	-0.686582	0.49246	1	0.918195
met18369	0.0872516	0.125099	1398.11	0.697461	0.48563	1	0.918195
met1572	-0.0824237	0.117229	1681.72	-0.703101	0.48209	1	0.918195
met57595	0.0914	0.128861	1848.5	0.709292	0.478233	1	0.918195
met57422	0.0497966	0.0683508	1591.93	0.728544	0.466388	1	0.918195
met52285	0.0576763	0.0821559	1395.98	0.702035	0.482775	1	0.918195
met37506	0.20618	0.284279	1820.21	0.725273	0.468378	1	0.918195
met35127	-0.0659389	0.0924478	1774.43	-0.713256	0.475781	1	0.918195
met46608	0.0578422	0.0822256	1848.26	0.703457	0.481859	1	0.918195
met52879	-0.015053	0.0220482	1576.94	-0.682734	0.494875	1	0.918195
met33937	0.0576889	0.0851007	1851.5	0.677889	0.497926	1	0.919923
met35436	0.0164452	0.0244439	1632.75	0.672773	0.501187	1	0.923239
met57453	0.0747066	0.111675	1853.88	0.668964	0.503602	1	0.924983
met18245	0.0965512	0.146976	1557.59	0.656918	0.511331	1	0.929948
met57417	0.0226205	0.0345066	1658.11	0.655543	0.512209	1	0.929948
met61867	0.039399	0.0600004	1697.28	0.656646	0.511498	1	0.929948
met43239	0.00579855	0.00877614	1285.49	0.660717	0.508912	1	0.929948
met57814	-0.0230568	0.0469804	1497.86	-0.490775	0.623658	1	0.932025
met34214	-0.0486601	0.0897893	1478.35	-0.541937	0.587944	1	0.932025
met27447	-0.0309631	0.0555175	1356.05	-0.557719	0.577129	1	0.932025
met33230	-0.0716633	0.117339	1725.91	-0.610736	0.541455	1	0.932025
met52462	0.116113	0.206948	1846.97	0.561071	0.574817	1	0.932025
met52464	-0.0529358	0.0912027	1825.84	-0.580419	0.561704	1	0.932025
met52454	0.124403	0.221517	1691.85	0.561597	0.574465	1	0.932025
met52449	0.0561223	0.119108	1741.96	0.471188	0.637565	1	0.932025
met38395	0.0123141	0.0256934	1320.93	0.479273	0.631824	1	0.932025
met52602	0.0410161	0.0732115	1323.67	0.560241	0.57541	1	0.932025
met57655	0.0341747	0.0570559	1380.21	0.598969	0.549292	1	0.932025
met57547	0.0132269	0.0252954	1557.41	0.522897	0.60112	1	0.932025
met43343	-0.0355373	0.0613869	1639.65	-0.578907	0.562731	1	0.932025
met1432	-0.0192219	0.0329953	1350.54	-0.582566	0.560282	1	0.932025
met43400	0.0188405	0.0379225	1611.06	0.496816	0.619386	1	0.932025
met45721	-0.00544009	0.00884165	1514.69	-0.615281	0.538462	1	0.932025
met57747	-0.0426728	0.0889427	1819.08	-0.479778	0.631443	1	0.932025
met46548	-0.0346215	0.05802	1851.98	-0.596717	0.55077	1	0.932025
met54805	-0.0559608	0.102428	1706.27	-0.54634	0.584903	1	0.932025
met1418	0.0552897	0.116146	1453.88	0.476035	0.634121	1	0.932025
met61833	0.0989871	0.168094	1848.65	0.588878	0.556015	1	0.932025
met37198	0.0189498	0.0340622	1695.45	0.55633	0.578059	1	0.932025
met46173	0.107616	0.180756	1731.81	0.595365	0.551678	1	0.932025
met1561	0.068639	0.135707	1647.08	0.505789	0.613072	1	0.932025
met37202	0.0268741	0.0513664	1835.22	0.523184	0.600909	1	0.932025
met37203	0.0354071	0.0545415	1791.4	0.649177	0.516307	1	0.932025
met31591	0.0234921	0.0429428	1728.15	0.547055	0.584411	1	0.932025
met1638	0.121325	0.186928	1804.53	0.649047	0.51639	1	0.932025
met32489	0.0405608	0.0748194	1375.23	0.542115	0.587827	1	0.932025
met22842	0.00931001	0.0197614	1480.67	0.471121	0.637623	1	0.932025
met63	0.0751272	0.154668	1724.61	0.485734	0.627218	1	0.932025
met34396	0.0335301	0.0696327	1497.05	0.481528	0.630212	1	0.932025
met38669	0.00731578	0.0138047	1692.5	0.529947	0.596218	1	0.932025
met44675	-0.0327408	0.0651799	1733.22	-0.502315	0.61551	1	0.932025
met53258	-0.0138923	0.026593	1553.81	-0.522402	0.601465	1	0.932025
met37459	0.0408045	0.0685061	1769.34	0.595634	0.551496	1	0.932025
met42381	0.0181088	0.0299138	1661.22	0.605364	0.54502	1	0.932025
met36738	0.0367456	0.0672717	1424.77	0.546227	0.584996	1	0.932025
met61887	-0.0122579	0.0205435	1506.75	-0.59668	0.550811	1	0.932025
met396	-0.0218661	0.0364835	1647.88	-0.599342	0.549027	1	0.932025
met42087	-0.019414	0.0302441	1802.72	-0.641909	0.521014	1	0.932025
met1645	0.0346924	0.0733863	1623.74	0.472736	0.636465	1	0.932025
met57330	0.0721126	0.144922	1739.18	0.497596	0.618832	1	0.932025
met1105	0.0467641	0.0814557	1456.17	0.574105	0.565985	1	0.932025
met34035	0.0372992	0.0617959	1470.38	0.603586	0.546212	1	0.932025
met57463	-0.0266878	0.0488054	1539.72	-0.546819	0.584582	1	0.932025
met32390	0.0215977	0.0376714	1535.42	0.573317	0.566514	1	0.932025
met48351	0.0611416	0.104651	1761.49	0.584244	0.559131	1	0.932025
met41726	0.0204779	0.0374127	1583.18	0.547352	0.584214	1	0.932025
met52925	0.0137016	0.0286108	1583.55	0.478897	0.632078	1	0.932025
met33935	0.0148432	0.0249455	1576.78	0.595024	0.551913	1	0.932025
met32562	0.0271904	0.0542091	1851.75	0.501583	0.616021	1	0.932025
met1806	-0.106005	0.164721	1854	-0.643542	0.519952	1	0.932025
met27731	-0.0618139	0.106674	1525.13	-0.579464	0.562362	1	0.932025
met43378	0.0326052	0.0518982	1433.24	0.628253	0.529938	1	0.932025
met57475	0.0814391	0.143111	1847.22	0.569062	0.569383	1	0.932025
met57477	0.0736629	0.133919	1796.11	0.550055	0.58235	1	0.932025
met47153	0.0691086	0.137631	1378.5	0.502128	0.615658	1	0.932025
met57474	0.0666047	0.121955	1788.24	0.546141	0.585037	1	0.932025
met57479	0.0656871	0.128618	1841.86	0.510714	0.609613	1	0.932025
met1358	-0.0860585	0.144635	1479.26	-0.595005	0.551931	1	0.932025
met38625	0.0490585	0.0998992	1581.06	0.49108	0.623438	1	0.932025
met19503	0.0983859	0.170764	1745.01	0.576151	0.564587	1	0.932025
met18494	0.0118713	0.022454	1606.72	0.528693	0.597092	1	0.932025
met32306	-0.0420974	0.0869025	1365.73	-0.484421	0.628164	1	0.932025
met48674	0.00347639	0.00691853	1458.47	0.502475	0.615409	1	0.932025
met3147	-0.0515414	0.0993483	1770.02	-0.518795	0.603969	1	0.932025
met46595	-0.0175821	0.0332556	1538.4	-0.528697	0.597092	1	0.932025
met46460	-0.0413406	0.0730039	1688.52	-0.566279	0.571279	1	0.932025
met33132	0.135563	0.209893	1851.34	0.645864	0.518447	1	0.932025
met47642	-0.0279988	0.0574381	1749.17	-0.48746	0.625993	1	0.932025
met46645	0.0118349	0.0223873	1377.13	0.528643	0.597138	1	0.932025
met47441	0.0526248	0.0915765	1374.34	0.574654	0.565619	1	0.932025
met47985	0.0192872	0.03135	1779.11	0.615222	0.538487	1	0.932025
met47013	0.0283949	0.0523638	1664.64	0.542262	0.587711	1	0.932025
met46681	0.0207066	0.0418501	1842.23	0.494781	0.620814	1	0.932025
met46689	-0.0173191	0.0296582	1508.85	-0.583956	0.559338	1	0.932025
met47000	0.0121228	0.0245071	1600.13	0.494662	0.620906	1	0.932025
met47872	0.0307233	0.0593835	1767.47	0.517371	0.604962	1	0.932025
met46707	-0.0279393	0.0478331	1478.68	-0.584101	0.559242	1	0.932025
met48047	0.0218575	0.0348978	1541.08	0.62633	0.531191	1	0.932025
met48067	0.0307145	0.0574736	1650.73	0.53441	0.59313	1	0.932025
met52881	-0.0135351	0.0213431	1488.68	-0.634167	0.52607	1	0.932025
met53172	0.012075	0.0228426	1514.79	0.528619	0.597148	1	0.932025
met33161	-0.00429464	0.00924933	1489.26	-0.464318	0.642487	1	0.934033
met46165	-0.00821898	0.017752	1378.72	-0.46299	0.643445	1	0.934033
met46515	0.0146202	0.0314987	1814.33	0.464151	0.642595	1	0.934033
met42450	0.0982007	0.224069	1836.35	0.438262	0.661248	1	0.937129
met52611	-0.0490824	0.110585	1815.52	-0.443843	0.657209	1	0.937129
met52468	0.0440403	0.103925	1794.23	0.423769	0.671785	1	0.937129
met42448	-0.0312311	0.0730855	1733.44	-0.427323	0.669198	1	0.937129
met62064	-0.0194849	0.046716	1667.37	-0.417093	0.676664	1	0.937129
met32445	0.00685024	0.0152105	1378.13	0.450362	0.65252	1	0.937129
met37211	0.0211123	0.0472597	1847.6	0.446729	0.655123	1	0.937129
met61846	0.0145805	0.0347717	1841.82	0.419321	0.675031	1	0.937129
met57461	0.0310145	0.0750718	1606.85	0.413131	0.679566	1	0.937129
met35637	0.0228995	0.0550645	1802.23	0.415867	0.677557	1	0.937129
met40481	-0.00313294	0.00703261	1397.1	-0.445488	0.656036	1	0.937129
met44664	0.0411523	0.0961408	1847.49	0.428042	0.66867	1	0.937129
met57741	0.0374697	0.0899853	1855.16	0.416398	0.677167	1	0.937129
met27513	-0.0334574	0.0732903	1695.22	-0.456505	0.648085	1	0.937129
met52634	-0.0160627	0.0360296	1607.39	-0.44582	0.655787	1	0.937129
met48490	-0.0874581	0.197826	1693.18	-0.442097	0.658475	1	0.937129
met27738	-0.0315137	0.0749729	1574.76	-0.420334	0.674299	1	0.937129
met57691	0.010618	0.0247973	1844.35	0.428194	0.66856	1	0.937129
met46510	0.0100434	0.0243287	1655.9	0.412822	0.679791	1	0.937129
met46970	-0.0189513	0.045785	1658.4	-0.41392	0.678986	1	0.937129
met52533	0.0184979	0.043752	1633.49	0.42279	0.672504	1	0.937129
met52544	0.0113618	0.0250648	1832.32	0.453296	0.650389	1	0.937129
met52769	-0.0497104	0.115937	1748.87	-0.428772	0.668142	1	0.937129
met6146	0.0162597	0.0398828	1825.01	0.407687	0.683551	1	0.940256
met36602	-0.0166389	0.0417023	1390.5	-0.398991	0.689961	1	0.945716
met52867	-0.0100484	0.025234	1796.12	-0.39821	0.690523	1	0.945716
met46106	-0.0039808	0.0101436	1477.51	-0.392444	0.694787	1	0.947437
met46409	0.0219481	0.0556897	1683.5	0.394114	0.693547	1	0.947437
met54968	0.0187182	0.0484657	1537.19	0.386216	0.69939	1	0.947561
met53231	0.0510275	0.13177	1727.82	0.387246	0.698622	1	0.947561
met49637	-0.0451447	0.115957	1495.11	-0.389323	0.697092	1	0.947561
met49617	0.0352899	0.102033	1702.35	0.345867	0.729486	1	0.948392
met35305	-0.013547	0.0355696	1466.56	-0.380859	0.703363	1	0.948392
met52446	-0.0314348	0.0875153	1808.14	-0.359192	0.719494	1	0.948392
met38296	0.0302135	0.0914931	1502.61	0.330227	0.741275	1	0.948392
met43266	0.00798711	0.0237518	1647.69	0.336274	0.736707	1	0.948392
met3155	0.0196807	0.0594804	1775.39	0.330876	0.740777	1	0.948392
met35136	0.0463743	0.129818	1421.42	0.357226	0.720976	1	0.948392
met36776	0.0449398	0.12443	1705.69	0.361166	0.71802	1	0.948392
met1107	-0.0646698	0.189411	1460.88	-0.341425	0.732833	1	0.948392
met32586	-0.0242773	0.0721989	1800.74	-0.336256	0.736717	1	0.948392
met1563	-0.00803246	0.0221816	1548.86	-0.362123	0.71731	1	0.948392
met58	-0.0577112	0.158355	1745.82	-0.364442	0.715572	1	0.948392
met52977	-0.00762876	0.0220012	1781.31	-0.346743	0.728825	1	0.948392
met1365	0.0282598	0.0742022	1507.14	0.380848	0.70337	1	0.948392
met1587	0.0214983	0.0587738	1576.51	0.365781	0.714578	1	0.948392
met35172	0.0278833	0.079045	1681.24	0.352753	0.724318	1	0.948392
met42109	-0.0446692	0.126247	1353.21	-0.353824	0.723526	1	0.948392
met48990	0.0597308	0.158577	1729.22	0.376666	0.706468	1	0.948392
met57482	0.0455678	0.129875	1807.12	0.350857	0.725736	1	0.948392
met15679	-0.0132953	0.0358982	1644.29	-0.370362	0.711161	1	0.948392
met46594	-0.0334512	0.0947888	1800.13	-0.352903	0.724203	1	0.948392
met46599	0.01823	0.0502095	1841.1	0.363079	0.716588	1	0.948392
met47652	-0.0113021	0.0330688	1675.27	-0.341776	0.732563	1	0.948392
met46364	-0.00647083	0.0197615	1342.84	-0.327447	0.743381	1	0.948392
met46632	0.0297137	0.0908504	1745.54	0.327062	0.74366	1	0.948392
met46665	0.0186679	0.0553121	1644.06	0.3375	0.735783	1	0.948392
met46906	-0.00523433	0.0147801	1527.29	-0.354147	0.723278	1	0.948392
met48994	0.0126253	0.0335385	1419.11	0.376442	0.706645	1	0.948392
met52502	0.0193645	0.0580927	1032.93	0.333338	0.738947	1	0.948392
met37475	0.00200354	0.00625831	1438.92	0.320141	0.748908	1	0.953155
met34397	0.00901829	0.0287506	1470.86	0.313673	0.753814	1	0.954024
met57664	0.0129035	0.0409706	1353.57	0.314944	0.752853	1	0.954024
met47988	0.00959381	0.0306267	1534.32	0.31325	0.754133	1	0.954024
met5086	-0.0405259	0.131247	1824.79	-0.308775	0.757528	1	0.954485
met49536	-0.0107641	0.0347737	1618.24	-0.309548	0.756944	1	0.954485
met36594	-0.0234294	0.0791909	1539.02	-0.29586	0.767377	1	0.955704
met33961	0.0533929	0.180781	1709.94	0.295345	0.767766	1	0.955704
met33971	0.0187733	0.063551	1503.39	0.295406	0.767725	1	0.955704
met41888	0.00689775	0.022719	1457.12	0.303612	0.761467	1	0.955704
met46590	-0.00715389	0.024183	1422.36	-0.295823	0.767409	1	0.955704
met46521	-0.00438172	0.0149244	1306.62	-0.293595	0.769114	1	0.955704
met46904	-0.0100091	0.0331395	1500.81	-0.302028	0.762673	1	0.955704
met47301	-0.00939154	0.0322136	1653.42	-0.29154	0.770675	1	0.955759
met1558	-0.0219051	0.0759696	1557.25	-0.288341	0.773124	1	0.956912
met52447	-0.0271282	0.10653	1835.29	-0.254654	0.799019	1	0.958943
met33972	0.0165234	0.0650808	1418.03	0.25389	0.799617	1	0.958943
met35132	-0.0267633	0.0968975	1699.1	-0.276202	0.782427	1	0.958943
met32980	0.0131666	0.0489985	1295.25	0.268714	0.788193	1	0.958943
met57443	-0.0304734	0.121848	1766.71	-0.250094	0.802544	1	0.958943
met601	0.0184117	0.0662777	1484.48	0.277797	0.781207	1	0.958943
met52974	-0.00571619	0.0226864	1488.4	-0.251966	0.801102	1	0.958943
met1121	-0.0217042	0.0821433	1421.02	-0.264224	0.791646	1	0.958943
met46144	-0.00344929	0.0123555	1504.26	-0.279171	0.780152	1	0.958943
met48434	0.00693733	0.0281263	1810.83	0.24665	0.805207	1	0.958943
met42092	-0.0240405	0.095031	1454.65	-0.252976	0.800323	1	0.958943
met1498	0.0220653	0.0848835	1457.41	0.259947	0.794941	1	0.958943
met33447	0.0148219	0.055119	1543.8	0.268908	0.788037	1	0.958943
met1361	0.0273908	0.108997	1470.24	0.251298	0.801619	1	0.958943
met61858	-0.0195264	0.0726771	1623.63	-0.268673	0.788215	1	0.958943
met57480	0.0379091	0.148842	1841.73	0.254693	0.798989	1	0.958943
met52437	0.0529161	0.20488	1807.7	0.258278	0.796222	1	0.958943
met47783	0.00959873	0.0345198	1746.46	0.278064	0.780996	1	0.958943
met49228	0.01177	0.0434861	1333.51	0.270662	0.786693	1	0.958943
met52297	0.00480009	0.0194235	1544.48	0.247127	0.804842	1	0.958943
met52431	0.00630831	0.0275184	1493.11	0.22924	0.818714	1	0.961843
met48580	0.00162317	0.0070643	1440.55	0.229771	0.818302	1	0.961843
met17805	0.0161803	0.06973	1445.04	0.232042	0.816538	1	0.961843
met57421	0.027516	0.121102	1855.66	0.227214	0.820283	1	0.961843
met38102	0.0163482	0.0719993	1441.57	0.227061	0.820409	1	0.961843
met1600	0.014822	0.0656401	1416.57	0.225807	0.821384	1	0.961843
met47824	-0.00444597	0.0187142	1275.11	-0.237572	0.812251	1	0.961843
met46709	0.00779633	0.0327553	1742.77	0.238017	0.811896	1	0.961843
met52788	-0.0632628	0.265532	1799.87	-0.23825	0.811715	1	0.961843
met52616	-0.0232498	0.108003	1534.47	-0.215271	0.829585	1	0.96689
met19324	-0.0128444	0.063067	1435.24	-0.203662	0.838646	1	0.96689
met52916	-0.00704497	0.0342703	1785.39	-0.205571	0.83715	1	0.96689
met32827	-0.00671104	0.0314884	1840.29	-0.213128	0.831251	1	0.96689
met48492	-0.0341472	0.162584	1463.67	-0.210028	0.833675	1	0.96689
met54979	0.0223532	0.108111	1807.28	0.206762	0.836219	1	0.96689
met594	-0.0125099	0.0611479	1353.8	-0.204584	0.837928	1	0.96689
met48491	0.0371719	0.184958	1848.76	0.200975	0.84074	1	0.96689
met57464	-0.00772693	0.0385196	1503.04	-0.200597	0.841041	1	0.96689
met46710	0.00380958	0.0180403	1425.19	0.211171	0.832784	1	0.96689
met33228	0.0224878	0.122431	1844.49	0.183677	0.854287	1	0.967076
met55072	0.00823588	0.042766	1401.16	0.19258	0.847316	1	0.967076
met54809	-0.0025728	0.0172457	1376.44	-0.149185	0.881429	1	0.967076
met35527	-0.00863537	0.0477785	1542.5	-0.180738	0.856597	1	0.967076
met37190	0.00575099	0.0365269	1840.42	0.157445	0.874911	1	0.967076
met1769	0.0162365	0.0890243	1369.16	0.182383	0.855309	1	0.967076
met32425	0.0102919	0.061109	1729.78	0.168419	0.866273	1	0.967076
met53263	-0.00515498	0.0341845	1590.68	-0.150799	0.880154	1	0.967076
met34457	0.0128386	0.0770522	1333.17	0.166622	0.867692	1	0.967076
met15990	-0.0148027	0.09835	1516.04	-0.15051	0.880382	1	0.967076
met57652	0.00979357	0.0633171	1505.7	0.154675	0.877098	1	0.967076
met62060	-0.0357699	0.200161	1816.82	-0.178705	0.858189	1	0.967076
met1303	-0.0286514	0.180325	1796.56	-0.158888	0.873775	1	0.967076
met1584	-0.00159235	0.00970382	1641.93	-0.164096	0.869676	1	0.967076
met57407	-0.00352046	0.0222104	1735.15	-0.158505	0.874077	1	0.967076
met47136	-0.0015628	0.00792834	1284.26	-0.197115	0.843769	1	0.967076
met39732	-0.00531489	0.0292507	1528.3	-0.181701	0.855841	1	0.967076
met20694	-0.0136857	0.0920551	1706.69	-0.148668	0.881833	1	0.967076
met57476	0.0126788	0.0842828	1768.59	0.150432	0.880441	1	0.967076
met52615	0.0242968	0.164576	1811.69	0.147633	0.882649	1	0.967076
met52495	-0.0185674	0.117583	1693.15	-0.157908	0.874548	1	0.967076
met46960	0.0374584	0.208242	1796.7	0.179879	0.857268	1	0.967076
met46643	-0.0100924	0.0572651	1612.3	-0.17624	0.860128	1	0.967076
met46672	-0.00341504	0.0203771	1431.56	-0.167592	0.866928	1	0.967076
met46695	-0.0109006	0.0608204	1484.3	-0.179227	0.857784	1	0.967076
met52525	-0.00816321	0.0444945	1553.15	-0.183465	0.854457	1	0.967076
met53127	-0.0147929	0.0835918	1419.77	-0.176967	0.85956	1	0.967076
met35157	-0.0159154	0.109648	1448.49	-0.14515	0.884613	1	0.967545
met57756	-0.00285034	0.020636	1534.81	-0.138125	0.89016	1	0.971925
met1444	-0.00749289	0.0553747	1468.11	-0.135312	0.892383	1	0.972667
met46516	0.00549785	0.0414436	1660.39	0.132659	0.894479	1	0.973268
met32415	-0.0102731	0.0788921	1478.63	-0.130216	0.896413	1	0.97369
met52478	-0.0166605	0.150636	1818.44	-0.110601	0.911945	1	0.975933
met52467	-0.00735729	0.0690967	1573.23	-0.106478	0.915216	1	0.975933
met12017	0.0125992	0.102503	1447.31	0.122916	0.902191	1	0.975933
met1110	0.0105377	0.0966213	1532.53	0.109062	0.913168	1	0.975933
met47114	-0.00105674	0.00856442	1421.42	-0.123388	0.901817	1	0.975933
met48493	-0.0236471	0.222884	1785.92	-0.106096	0.915518	1	0.975933
met36095	0.00137683	0.0128652	1436.11	0.10702	0.914788	1	0.975933
met1670	-0.0162003	0.137732	1683.45	-0.117622	0.906381	1	0.975933
met46986	0.00239692	0.022425	1549.77	0.106886	0.914893	1	0.975933
met46384	-0.0077889	0.0682572	1855.65	-0.114111	0.909162	1	0.975933
met47011	0.00253726	0.0209754	1449.68	0.120964	0.903736	1	0.975933
met1336	0.0114063	0.112161	1471.25	0.101696	0.919012	1	0.976386
met52135	0.00881974	0.0867592	1446.28	0.101658	0.919043	1	0.976386
met52669	0.00623973	0.0640512	1782.84	0.0974178	0.922406	1	0.976665
met35718	0.00903221	0.0920205	1506.21	0.0981543	0.921823	1	0.976665
met1126	-0.0171322	0.185827	1716.19	-0.092194	0.926555	1	0.979412
met39837	-0.00500344	0.062638	1393.8	-0.0798786	0.936345	1	0.986068
met31536	0.000623185	0.00795219	1482.44	0.0783665	0.937547	1	0.986068
met46503	-0.00191662	0.0234848	1723.52	-0.081611	0.934966	1	0.986068
met33173	-0.000388549	0.00670386	1427.66	-0.057959	0.953789	1	0.98636
met35675	0.00864671	0.132232	1346.76	0.0653904	0.947873	1	0.98636
met513	-0.0151303	0.278069	1858.64	-0.0544121	0.956613	1	0.98636
met39831	0.00403557	0.06825	1434.69	0.0591292	0.952857	1	0.98636
met33587	0.004775	0.0666405	1455.11	0.0716531	0.942888	1	0.98636
met37496	-0.00839346	0.150296	1856.16	-0.0558463	0.95547	1	0.98636
met566	-0.00416835	0.064905	1483.66	-0.0642223	0.948802	1	0.98636
met52435	-0.00863936	0.130471	1683.04	-0.0662167	0.947213	1	0.98636
met46733	-0.00155878	0.0237263	1690.75	-0.0656985	0.947626	1	0.98636
met46701	-0.00400787	0.0662398	1844.85	-0.0605054	0.95176	1	0.98636
met46294	-0.00132804	0.0220652	1787.7	-0.0601873	0.952013	1	0.98636
met54837	-0.00202228	0.0311172	1451.93	-0.064989	0.948192	1	0.98636
met52610	-0.00729613	0.147279	1825.76	-0.0495395	0.960495	1	0.987791
met38168	0.00186596	0.0449032	1771.83	0.0415552	0.966858	1	0.987791
met47112	0.00118697	0.0321401	1740.27	0.0369312	0.970544	1	0.987791
met57370	-0.00520658	0.124684	1832.47	-0.0417581	0.966696	1	0.987791
met62059	-0.00311274	0.0660101	1660.23	-0.0471554	0.962395	1	0.987791
met48408	-0.000959055	0.0241319	1468.13	-0.0397422	0.968304	1	0.987791
met48772	0.000862721	0.0229133	1824.58	0.0376515	0.96997	1	0.987791
met52873	-0.00103701	0.0263859	1429.27	-0.0393015	0.968655	1	0.987791
met43829	0.00284535	0.0845475	1612.06	0.0336539	0.973157	1	0.988853
met18477	0.000466492	0.0194893	1616.74	0.0239358	0.980907	1	0.995123
met46639	0.000368256	0.0198684	1729.44	0.0185347	0.985214	1	0.997886
met605	-0.000681707	0.0451672	1424.98	-0.0150929	0.98796	1	0.998118
met46260	0.00222316	0.155731	1800.64	0.0142756	0.988612	1	0.998118
met39598	-1.60711e-05	0.0090718	1550.75	-0.00177155	0.998587	1	0.999511
met62101	0.000556865	0.150027	1715.8	0.00371176	0.997039	1	0.999511
met48152	0.00254969	0.284175	1729.27	0.00897224	0.992842	1	0.999511
met53	-0.00183784	0.320162	1740.73	-0.00574035	0.995421	1	0.999511
met42382	0.000253689	0.0400984	1714.14	0.00632667	0.994953	1	0.999511
met20693	3.37495e-05	0.0550206	1713.98	0.000613397	0.999511	1	0.999511

## Sheet: Plasma-EXE
Supplementary Table S3. Associations between metabolites and cognitive function. Each linear mixed model included a random intercept for family and individual and a random slope for age.
The outcome was a cognitive function and metabolite, smoking status, sex, race, education level, practice effect.
COMP.ID	Estimate	Std..Error	df	t.value	Pr...t..	Bon	FDR
met46588	0.176828	0.0437354	1848.86	4.04314	5.49045e-05	0.0345898	0.0345898
met37207	0.135079	0.0350103	1609.23	3.85827	0.000118701	0.0747814	0.0373907
met57483	0.38934	0.10836	1656.78	3.59303	0.000336409	0.211938	0.0706459
met6146	-0.100276	0.0340262	1555.67	-2.94702	0.00325633	1	0.170957
met37209	0.154689	0.0521025	1792.35	2.96894	0.003028	1	0.170957
met15500	0.567113	0.175557	1416.85	3.23037	0.00126469	0.796756	0.170957
met44878	-0.27149	0.0895976	1707.61	-3.0301	0.00248143	1	0.170957
met57475	0.362787	0.122584	1592.64	2.95949	0.00312704	1	0.170957
met57481	0.248353	0.0820559	1334.19	3.02663	0.00252034	1	0.170957
met57482	0.339505	0.110279	1517.77	3.07862	0.00211692	1	0.170957
met19503	0.423026	0.141829	1378.83	2.98266	0.00290777	1	0.170957
met47739	-0.0618254	0.020118	1222.05	-3.07314	0.00216509	1	0.170957
met54	0.482605	0.168846	1206.89	2.85825	0.00433298	1	0.209983
met42463	0.468765	0.171394	1609.01	2.73501	0.00630621	1	0.220717
met52615	0.390258	0.139044	1490.97	2.80673	0.00506977	1	0.220717
met48493	0.52318	0.187292	1445.99	2.79339	0.00528466	1	0.220717
met2761	0.393508	0.143178	1506.76	2.7484	0.00606023	1	0.220717
met46681	0.100841	0.0364266	1696.35	2.76832	0.00569584	1	0.220717
met22116	0.356771	0.133751	1352.34	2.66742	0.00773481	1	0.25647
met31591	0.101018	0.0386131	1794.88	2.61615	0.00896729	1	0.28247
met57480	0.334825	0.129198	1659.19	2.59156	0.00963791	1	0.289137
met53	0.682234	0.265186	1344.95	2.57266	0.0101983	1	0.292043
met18349	0.238192	0.09328	1358.05	2.55352	0.0107726	1	0.295076
met37529	0.375293	0.148258	1472.78	2.53136	0.0114655	1	0.298213
met48491	0.401268	0.159239	1619.68	2.51991	0.0118339	1	0.298213
met1516	-0.266813	0.108849	1005.16	-2.45123	0.0144065	1	0.303834
met47154	0.244991	0.0994685	1432	2.463	0.013895	1	0.303834
met48674	0.013531	0.00551254	1109.96	2.45458	0.0142576	1	0.303834
met46608	0.174927	0.0714583	1684.54	2.44796	0.0144683	1	0.303834
met54837	-0.0721257	0.0294534	1739.4	-2.44881	0.0144311	1	0.303834
met20675	0.173139	0.0720272	1656.53	2.4038	0.0163348	1	0.310848
met52669	-0.12387	0.0534804	1418.89	-2.31618	0.0206905	1	0.310848
met38395	-0.0474827	0.0201531	1013.9	-2.3561	0.0186577	1	0.310848
met53242	0.210055	0.0879932	1366.59	2.38718	0.0171136	1	0.310848
met35136	0.239969	0.102977	1085.43	2.33031	0.0199725	1	0.310848
met48885	-0.291429	0.1233	1442.9	-2.36358	0.0182312	1	0.310848
met1769	0.1599	0.070018	1029.42	2.2837	0.0225922	1	0.310848
met32425	0.124608	0.0552297	1822.69	2.25619	0.024177	1	0.310848
met36747	0.381444	0.168704	1617.12	2.26103	0.0238901	1	0.310848
met5086	-0.260219	0.114732	1673.92	-2.26805	0.0234529	1	0.310848
met33973	0.0944112	0.0402108	1770.47	2.34791	0.0189889	1	0.310848
met44872	0.239789	0.103179	1093.54	2.32402	0.0203071	1	0.310848
met22137	0.203886	0.088528	1583.44	2.30307	0.0214039	1	0.310848
met1648	0.382798	0.167382	1545.6	2.28697	0.0223322	1	0.310848
met57473	0.162222	0.0714359	1394.4	2.27087	0.0233067	1	0.310848
met47153	0.254898	0.108577	1053.56	2.34761	0.0190784	1	0.310848
met42459	0.446384	0.19427	1549.23	2.29775	0.0217087	1	0.310848
met46640	0.137368	0.058655	1417.51	2.34197	0.0193202	1	0.310848
met46690	0.0621824	0.0270203	1295.99	2.30132	0.0215316	1	0.310848
met33961	0.330952	0.14922	1324.68	2.21788	0.0267319	1	0.317992
met36098	-0.0533195	0.0240386	1109.73	-2.21807	0.0267517	1	0.317992
met60	0.477129	0.213013	1340.46	2.23991	0.0252604	1	0.317992
met52437	0.385458	0.173018	1470.81	2.22786	0.0260409	1	0.317992
met57474	0.225956	0.102365	1440.07	2.20736	0.0274463	1	0.320207
met47114	-0.0149167	0.00678385	1086.42	-2.19886	0.0280979	1	0.321849
met57453	0.211426	0.0970447	1664.85	2.17864	0.0294981	1	0.326032
met46390	0.182491	0.0835174	1846.14	2.18507	0.0290091	1	0.326032
met52465	-0.132708	0.0617995	1655.18	-2.14739	0.0319074	1	0.338664
met15676	0.293695	0.137078	1396.61	2.14254	0.0323222	1	0.338664
met1561	0.236798	0.11081	1262.74	2.13698	0.0327912	1	0.338664
met44876	0.100291	0.0467948	1255.3	2.14321	0.0322876	1	0.338664
met35126	-0.104394	0.0490139	1303.67	-2.12989	0.0333674	1	0.339055
met52464	-0.165409	0.0783427	1581.17	-2.11135	0.0348989	1	0.343973
met15122	-0.128556	0.0608782	1072.84	-2.1117	0.0349433	1	0.343973
met40730	-0.0852658	0.0405806	1298.93	-2.10115	0.0358204	1	0.347183
met42448	-0.125779	0.0609196	1367.66	-2.06467	0.0391426	1	0.362731
met37496	-0.267183	0.129433	1622.37	-2.06426	0.0391519	1	0.362731
met41888	0.0376319	0.0181228	1124.51	2.0765	0.0380746	1	0.362731
met45095	-0.0896324	0.0440364	1024.19	-2.03542	0.0420659	1	0.373261
met15990	0.16132	0.0791549	1148.89	2.03803	0.041776	1	0.373261
met1125	0.396842	0.193956	1310.71	2.04604	0.0409513	1	0.373261
met46115	0.0894362	0.0440992	1385.71	2.02807	0.042744	1	0.37401
met40703	-0.0547166	0.0271351	1075.15	-2.01645	0.0440011	1	0.379736
met58	0.283809	0.142717	1827.19	1.98861	0.046893	1	0.399224
met46384	0.116717	0.0591059	1659.27	1.97471	0.0484672	1	0.407124
met1417	0.17153	0.0872921	1433.05	1.96502	0.0496053	1	0.411202
met32586	0.117583	0.0611373	1482.52	1.92326	0.0546384	1	0.414725
met18369	0.190606	0.099055	1068.64	1.92424	0.0545895	1	0.414725
met46225	-0.143502	0.0741842	1827.94	-1.9344	0.0532179	1	0.414725
met48490	0.317694	0.163749	1326.13	1.94012	0.0525763	1	0.414725
met20693	0.088627	0.0458685	1350.44	1.9322	0.0535442	1	0.414725
met47800	0.1573	0.081057	1240.93	1.9406	0.0525325	1	0.414725
met46493	0.0956541	0.0491309	1481.54	1.94692	0.0517328	1	0.414725
met43582	-0.136577	0.072573	1121.94	-1.88193	0.0601042	1	0.425074
met37186	0.0448657	0.0242488	1718.28	1.85022	0.0644529	1	0.425074
met37187	0.0352918	0.018519	1352.69	1.90571	0.0568996	1	0.425074
met1638	0.290184	0.158192	1491.13	1.83438	0.0667974	1	0.425074
met57443	0.189196	0.102491	1424.47	1.84598	0.0651022	1	0.425074
met43488	0.153312	0.0818873	1627.19	1.87223	0.0613545	1	0.425074
met48841	-0.0379673	0.0206926	1291.85	-1.83483	0.0667611	1	0.425074
met52433	0.282035	0.148974	1675.6	1.89318	0.0585058	1	0.425074
met57477	0.207422	0.112957	1460.18	1.83629	0.0665174	1	0.425074
met15336	0.0132684	0.0070408	1020.59	1.8845	0.0597816	1	0.425074
met46594	0.159091	0.084698	1820.56	1.87834	0.060495	1	0.425074
met46986	0.0333079	0.0180868	1176.09	1.84156	0.0657916	1	0.425074
met46633	0.127466	0.0687192	1305.24	1.85488	0.063838	1	0.425074
met46388	0.124371	0.066326	1286.87	1.87514	0.0609994	1	0.425074
met57714	0.0565139	0.0306437	1769.39	1.84423	0.0653169	1	0.425074
met57715	0.111962	0.0601335	1714.37	1.86188	0.0627905	1	0.425074
met1564	0.391128	0.214918	1276.57	1.8199	0.0690086	1	0.431883
met47783	0.0524903	0.0288686	1406.77	1.81825	0.0692384	1	0.431883
met32619	0.102725	0.0567672	1765.36	1.80959	0.0705301	1	0.435627
met52697	0.205187	0.114033	1402.01	1.79936	0.0721771	1	0.440545
met37203	0.0819614	0.0457505	1445.18	1.79149	0.0734242	1	0.440545
met57476	0.12695	0.0707579	1424.87	1.79414	0.0730025	1	0.440545
met1418	-0.164027	0.0924369	1108.53	-1.77448	0.0762585	1	0.453193
met61873	-0.0164359	0.00928509	1139.89	-1.77014	0.0769708	1	0.453193
met36776	-0.180474	0.102975	1339.26	-1.7526	0.0799003	1	0.466085
met46695	-0.084514	0.0486813	1129.74	-1.73607	0.0828248	1	0.478712
met512	0.366333	0.21555	1439.08	1.69952	0.0894365	1	0.492834
met1642	-0.112136	0.0659492	1247.23	-1.70034	0.0893161	1	0.492834
met38165	-0.211546	0.124057	1295.5	-1.70523	0.0883921	1	0.492834
met62152	0.123838	0.072977	1217.83	1.69695	0.0899617	1	0.492834
met46645	0.0299928	0.0176483	1044.43	1.69948	0.0895275	1	0.492834
met48989	-0.0282517	0.0165588	1147.12	-1.70614	0.0882532	1	0.492834
met46364	0.0261527	0.0155235	1031.16	1.68471	0.0923465	1	0.501537
met42449	-0.112654	0.0679547	1523.54	-1.65779	0.0975664	1	0.521463
met57331	0.124787	0.0756829	1434.32	1.64881	0.0994056	1	0.521463
met57516	0.161419	0.0982928	1573.27	1.64223	0.100742	1	0.521463
met54955	-0.0352087	0.0214584	1081.46	-1.64079	0.101131	1	0.521463
met1302	0.251281	0.151648	1163.37	1.657	0.0977891	1	0.521463
met64	0.418233	0.253376	1333.61	1.65064	0.0990474	1	0.521463
met49463	-0.0395737	0.0241676	1137.89	-1.63747	0.101809	1	0.521463
met35132	0.129327	0.079938	1295.65	1.61784	0.105941	1	0.538248
met53013	0.177813	0.110708	1422.19	1.60614	0.108465	1	0.539635
met1284	0.228644	0.142463	1346.17	1.60494	0.108743	1	0.539635
met46601	0.0767447	0.0478256	1442.49	1.60468	0.108784	1	0.539635
met47135	-0.0375019	0.0237636	1405.86	-1.57812	0.114763	1	0.564847
met57520	0.0929558	0.059066	1197.62	1.57376	0.115807	1	0.565568
met3155	-0.0771735	0.0500314	1448.88	-1.5425	0.12317	1	0.596902
met52977	-0.028101	0.0183994	1421.3	-1.52728	0.126914	1	0.610349
met52452	0.305819	0.200897	1319.21	1.52227	0.128181	1	0.611774
met46517	0.078442	0.0518974	1541.66	1.51148	0.130871	1	0.619913
met52533	-0.0539901	0.0358463	1262.97	-1.50615	0.132278	1	0.621902
met34396	0.0838037	0.0559207	1142.6	1.49862	0.134249	1	0.626496
met2137	0.10593	0.0712862	1485.2	1.48598	0.137496	1	0.632282
met18368	0.062601	0.0420827	1468.27	1.48757	0.137079	1	0.632282
met46911	0.0189532	0.0128233	1278	1.47803	0.139645	1	0.632924
met48067	0.0697256	0.0470807	1268.08	1.48098	0.13886	1	0.632924
met31536	0.00933152	0.00635672	1121.75	1.46798	0.142391	1	0.640758
met52610	0.184004	0.127007	1614.13	1.44877	0.147596	1	0.643035
met57365	0.149148	0.103217	1343.27	1.445	0.14869	1	0.643035
met57479	0.159093	0.110197	1565.36	1.44371	0.149021	1	0.643035
met46960	-0.253698	0.174976	1427.96	-1.4499	0.147306	1	0.643035
met46603	0.0793903	0.0546435	1394.53	1.45288	0.146483	1	0.643035
met54704	-0.175434	0.120958	1368.55	-1.45037	0.147183	1	0.643035
met46672	0.0233397	0.0162045	1087.9	1.44033	0.150063	1	0.643127
met52470	-0.10199	0.07176	1389.7	-1.42127	0.155464	1	0.64522
met52446	-0.10634	0.0742037	1485.85	-1.43309	0.152043	1	0.64522
met19324	0.0717769	0.0501812	1086.99	1.43035	0.152903	1	0.64522
met47031	-0.00992977	0.00700459	1111.49	-1.41761	0.156585	1	0.64522
met35159	0.0515586	0.0367441	1347.84	1.40318	0.160793	1	0.64522
met48429	0.0183558	0.0130458	1262.87	1.40703	0.159666	1	0.64522
met61865	-0.0714415	0.0508115	1354.47	-1.40601	0.15995	1	0.64522
met46643	-0.0661771	0.0466481	1226.04	-1.41864	0.156257	1	0.64522
met47872	0.0694922	0.0494666	1374.84	1.40483	0.160297	1	0.64522
met46710	0.0201762	0.0143277	1087.2	1.4082	0.159358	1	0.64522
met27731	-0.11941	0.0857395	1161.99	-1.3927	0.163976	1	0.653827
met57747	-0.108997	0.0789474	1783.28	-1.38063	0.167567	1	0.656164
met1563	-0.0247063	0.0178963	1184.98	-1.38052	0.167686	1	0.656164
met601	0.0742071	0.0535027	1128.99	1.38698	0.165722	1	0.656164
met48580	0.00763949	0.00561941	1091.31	1.35948	0.174274	1	0.661572
met43333	0.00968822	0.00713698	1214.13	1.35747	0.174885	1	0.661572
met15506	-0.210344	0.156266	1288.12	-1.34606	0.178519	1	0.661572
met35436	-0.0270496	0.0199336	1244.64	-1.35698	0.175033	1	0.661572
met52925	-0.0313452	0.0232853	1221.26	-1.34614	0.178508	1	0.661572
met52436	0.170824	0.125887	1323.65	1.35696	0.175024	1	0.661572
met47824	-0.0200445	0.0146079	987.24	-1.37216	0.170324	1	0.661572
met46902	0.0385342	0.0285689	1286.3	1.34882	0.177633	1	0.661572
met52483	0.103757	0.0769965	1300.32	1.34756	0.178035	1	0.661572
met35628	-0.0938233	0.0709746	1168.32	-1.32193	0.186451	1	0.666907
met33161	-0.00980764	0.00740748	1134.16	-1.32402	0.185763	1	0.666907
met41220	0.0962391	0.0730356	1086.72	1.3177	0.187882	1	0.666907
met48492	0.171085	0.129999	1113.68	1.31605	0.188428	1	0.666907
met37459	0.0798	0.0605765	1727.02	1.31734	0.187898	1	0.666907
met52633	0.0352035	0.0265859	1276.3	1.32414	0.185693	1	0.666907
met46590	-0.0254389	0.0192079	1090.53	-1.32439	0.18565	1	0.666907
met47393	-0.0224224	0.0169891	1071.91	-1.31981	0.18718	1	0.666907
met57720	0.0282625	0.0215422	1463.16	1.31196	0.189739	1	0.667797
met52025	-0.0332019	0.0253772	1170.14	-1.30834	0.191017	1	0.668558
met42446	0.289941	0.225494	1316.79	1.28581	0.198737	1	0.671917
met12032	-0.0087473	0.00683991	1119.29	-1.27886	0.20121	1	0.671917
met37252	-0.0259597	0.0203199	1779.56	-1.27755	0.201575	1	0.671917
met32452	0.129515	0.100485	1373.73	1.2889	0.19765	1	0.671917
met48460	0.00795551	0.00617512	1158.31	1.28832	0.197893	1	0.671917
met48408	-0.0248199	0.0193287	1124.43	-1.2841	0.199373	1	0.671917
met46662	0.0774223	0.0599314	1337.03	1.29185	0.196632	1	0.671917
met46738	0.127886	0.0995159	1325.04	1.28508	0.19899	1	0.671917
met46486	0.0380638	0.0297913	1511.18	1.27768	0.201558	1	0.671917
met57421	0.133284	0.105557	1687.2	1.26267	0.206882	1	0.675313
met62059	-0.0683691	0.0540889	1269.41	-1.26401	0.206457	1	0.675313
met36103	-0.046979	0.0371911	1299.03	-1.26318	0.206752	1	0.675313
met52435	0.136455	0.107502	1296.42	1.26933	0.204552	1	0.675313
met32492	-0.0343776	0.0273602	1012.06	-1.25648	0.20923	1	0.676117
met53263	0.0348918	0.0278407	1221.76	1.25327	0.210347	1	0.676117
met46709	0.034106	0.0272077	1369.5	1.25354	0.210222	1	0.676117
met37190	0.0392639	0.0315045	1633.23	1.24629	0.212835	1	0.677203
met42381	0.0306678	0.0245687	1281.28	1.24824	0.21217	1	0.677203
met52477	-0.0637504	0.055447	1002.14	-1.14975	0.25052	1	0.683182
met27447	0.0502468	0.0438844	1046.44	1.14498	0.252479	1	0.683182
met36602	0.0352669	0.0329294	1046.22	1.07099	0.284423	1	0.683182
met52461	-0.18901	0.162676	1283.32	-1.16188	0.245502	1	0.683182
met61868	-0.109	0.0896258	1621.47	-1.21617	0.224098	1	0.683182
met52447	-0.112538	0.0923782	1637.73	-1.21823	0.223313	1	0.683182
met52466	-0.05634	0.0536256	1668.68	-1.05062	0.293587	1	0.683182
met57547	-0.0215126	0.0204424	1183.13	-1.05235	0.292852	1	0.683182
met52916	0.0342966	0.0286861	1420.21	1.19558	0.232059	1	0.683182
met55072	0.0401837	0.03381	1049.52	1.18851	0.234899	1	0.683182
met32197	0.11338	0.0980752	1422.53	1.15605	0.247855	1	0.683182
met45721	-0.00790415	0.00710827	1159.52	-1.11196	0.266384	1	0.683182
met1566	0.0824147	0.0781256	1708.02	1.0549	0.29162	1	0.683182
met32457	0.0531661	0.0501467	1182.04	1.06021	0.289265	1	0.683182
met44526	0.157918	0.148992	1291.83	1.05991	0.289382	1	0.683182
met1558	-0.0674701	0.0613236	1174.88	-1.10023	0.271457	1	0.683182
met15736	-0.00574058	0.00542631	1112.09	-1.05792	0.290324	1	0.683182
met37198	0.034378	0.0283267	1347.38	1.21362	0.225104	1	0.683182
met47120	-0.0468158	0.0387533	1108.97	-1.20805	0.227287	1	0.683182
met46173	-0.160449	0.150013	1360.69	-1.06956	0.285006	1	0.683182
met22132	0.0998512	0.082889	1205.6	1.20464	0.228579	1	0.683182
met47886	0.0984564	0.0854432	1504.53	1.1523	0.249379	1	0.683182
met43807	0.113737	0.098089	1570.31	1.15952	0.246419	1	0.683182
met57635	0.0731935	0.0688242	1540.24	1.06348	0.287729	1	0.683182
met22842	-0.0181456	0.0157767	1116.72	-1.15015	0.250328	1	0.683182
met27718	0.0999129	0.08593	1685.07	1.16272	0.245106	1	0.683182
met46106	0.00870391	0.00812167	1142.3	1.07169	0.284086	1	0.683182
met38669	0.0125268	0.0113898	1325.93	1.09983	0.271606	1	0.683182
met33949	0.0970206	0.0895941	1364.5	1.08289	0.279049	1	0.683182
met2734	0.088737	0.0837221	1153.87	1.0599	0.289412	1	0.683182
met587	0.110378	0.0942507	1292.99	1.17111	0.241771	1	0.683182
met1572	0.102908	0.0964684	1298.89	1.06676	0.28628	1	0.683182
met57595	0.117153	0.110702	1590.39	1.05827	0.290092	1	0.683182
met61862	-0.04487	0.0402793	1173.39	-1.11397	0.26552	1	0.683182
met62060	-0.206634	0.175873	1733.46	-1.17491	0.240193	1	0.683182
met27513	0.0636596	0.0605003	1312.87	1.05222	0.292892	1	0.683182
met33441	-0.0724245	0.0600954	1420.89	-1.20516	0.228343	1	0.683182
met34407	-0.0741618	0.070801	1293.25	-1.04747	0.29508	1	0.683182
met57511	0.0926919	0.0829048	1296.82	1.11805	0.263752	1	0.683182
met57512	0.0697411	0.0657603	1359.67	1.06053	0.28909	1	0.683182
met33959	0.0605365	0.057841	1302.73	1.0466	0.295477	1	0.683182
met44877	-0.123535	0.118889	1240.16	-1.03908	0.298969	1	0.683182
met35157	0.107603	0.0872821	1095.11	1.23282	0.217908	1	0.683182
met35172	-0.0830896	0.0717848	1804.2	-1.15748	0.247229	1	0.683182
met37506	0.264292	0.240668	1489.11	1.09816	0.272312	1	0.683182
met1898	0.141908	0.129443	1463.35	1.0963	0.27313	1	0.683182
met52495	0.108449	0.096993	1310.34	1.11811	0.263726	1	0.683182
met38625	-0.0980851	0.0810163	1205.45	-1.21068	0.226254	1	0.683182
met57464	0.0333554	0.0308949	1142.73	1.07964	0.280529	1	0.683182
met37058	-0.130499	0.119457	1601.96	-1.09244	0.274806	1	0.683182
met2125	0.102105	0.0922645	1036.77	1.10666	0.268698	1	0.683182
met36095	0.0109215	0.010236	1091.52	1.06697	0.286219	1	0.683182
met32306	-0.0771065	0.068608	1037.76	-1.12387	0.261328	1	0.683182
met42593	-0.032153	0.0294046	1650.52	-1.09347	0.274349	1	0.683182
met1299	0.206741	0.171816	1398.19	1.20327	0.229075	1	0.683182
met1649	0.192623	0.163904	1254.4	1.17522	0.24013	1	0.683182
met15679	0.0307954	0.0293866	1259.64	1.04794	0.294867	1	0.683182
met46460	0.0676203	0.0604392	1328.37	1.11882	0.263421	1	0.683182
met46914	0.0565351	0.0545377	1365.71	1.03662	0.300095	1	0.683182
met46260	-0.159617	0.131053	1468.92	-1.21795	0.223437	1	0.683182
met33140	0.048993	0.0469605	1313.65	1.04328	0.29701	1	0.683182
met47441	-0.0809909	0.072389	1053.51	-1.11883	0.263469	1	0.683182
met46646	0.0222301	0.0198121	1128.1	1.12205	0.262082	1	0.683182
met47977	0.0214568	0.0191436	1398.09	1.12083	0.262551	1	0.683182
met46632	-0.0789883	0.0760133	1404.78	-1.03914	0.298919	1	0.683182
met46665	0.0525455	0.0452693	1258.05	1.16073	0.245972	1	0.683182
met47013	0.0449642	0.0429423	1264.67	1.04708	0.295261	1	0.683182
met48009	0.0639331	0.051633	1227.89	1.23822	0.215871	1	0.683182
met47301	0.03125	0.0263363	1264.72	1.18658	0.235617	1	0.683182
met46968	-0.0416879	0.0382019	1644.98	-1.09125	0.275322	1	0.683182
met47011	0.0175829	0.0167128	1097.1	1.05206	0.293002	1	0.683182
met49536	0.0292944	0.028275	1219.04	1.03605	0.300383	1	0.683182
met49557	0.0677371	0.06059	1432.05	1.11796	0.263772	1	0.683182
met52502	0.0456874	0.0440527	848.412	1.03711	0.299981	1	0.683182
met52773	-0.026295	0.0251494	1361.32	-1.04555	0.295953	1	0.683182
met52865	0.0390075	0.0323578	1446.13	1.20551	0.228204	1	0.683182
met52879	0.0207178	0.0178373	1198.85	1.16149	0.245674	1	0.683182
met53172	-0.0214127	0.0183413	1144.63	-1.16745	0.24327	1	0.683182
met54877	0.0650359	0.053484	1333.67	1.21599	0.224205	1	0.683182
met52297	-0.0162374	0.0157105	1189.92	-1.03354	0.30156	1	0.683391
met52602	0.0589249	0.0575461	1001.33	1.02396	0.306102	1	0.690263
met57521	0.0919868	0.0905919	1593.9	1.0154	0.310071	1	0.690263
met57664	0.032898	0.0323554	1037.55	1.01677	0.309499	1	0.690263
met20694	0.0775431	0.076002	1324.46	1.02028	0.307784	1	0.690263
met54977	0.147787	0.145171	1646.76	1.01802	0.308819	1	0.690263
met52682	0.117925	0.116927	1591.43	1.00854	0.313347	1	0.694427
met46295	-0.0518627	0.0515066	1442.76	-1.00691	0.314145	1	0.694427
met46607	0.013959	0.0139014	1231.7	1.00415	0.315504	1	0.694992
met34365	-0.00859597	0.00862377	1078.67	-0.996776	0.319097	1	0.696188
met12261	0.0182386	0.0183089	1269.04	0.99616	0.319362	1	0.696188
met46906	0.0119007	0.0118923	1167.8	1.00071	0.317175	1	0.696188
met52438	-0.0934236	0.0953195	1146.2	-0.980109	0.327239	1	0.696489
met12017	-0.0896023	0.0908764	1460.75	-0.98598	0.324306	1	0.696489
met37059	-0.0248394	0.0251406	1141.92	-0.98802	0.323352	1	0.696489
met48772	0.0190737	0.0193864	1494.74	0.983869	0.325339	1	0.696489
met46972	-0.0740785	0.074564	1050.71	-0.993489	0.320701	1	0.696489
met52873	0.0206668	0.0209607	1091.62	0.985979	0.324362	1	0.696489
met53114	-0.0517953	0.0527994	1103.1	-0.980983	0.326816	1	0.696489
met19258	-0.0508085	0.0535222	1192.06	-0.949298	0.342662	1	0.697532
met61843	0.0382164	0.0399368	1064.45	0.956922	0.338824	1	0.697532
met32980	0.0366092	0.0383769	1003.19	0.953937	0.340345	1	0.697532
met44675	0.0529675	0.0543982	1392.05	0.973699	0.330375	1	0.697532
met32328	-0.0639762	0.0668055	1496.18	-0.957648	0.338395	1	0.697532
met45404	0.00567443	0.00601173	1033.33	0.943894	0.345444	1	0.697532
met33967	0.045786	0.0474313	1052.6	0.965311	0.334611	1	0.697532
met594	0.0454981	0.0481415	1020.15	0.945092	0.344836	1	0.697532
met57745	-0.0225234	0.023473	1268.38	-0.959542	0.337468	1	0.697532
met61858	0.057427	0.0595229	1256.55	0.964788	0.334837	1	0.697532
met47687	-0.144303	0.149157	1553.25	-0.967458	0.333466	1	0.697532
met46510	0.0192893	0.019981	1282.53	0.965386	0.334534	1	0.697532
met46623	0.0219986	0.0232771	1258.03	0.945076	0.344802	1	0.697532
met52772	0.0329777	0.0347109	1176.15	0.950065	0.342274	1	0.697532
met52909	0.0754672	0.0793559	1390.11	0.950997	0.341771	1	0.697532
met57718	0.0418689	0.0434328	1347.43	0.963993	0.335222	1	0.697532
met46223	0.0962113	0.103368	1407.46	0.930766	0.352134	1	0.707517
met46360	0.0351395	0.0377949	1726.45	0.929741	0.352635	1	0.707517
met33132	-0.165974	0.181379	1629.16	-0.915068	0.360291	1	0.720582
met33173	-0.00486613	0.00533258	1093.1	-0.912527	0.361692	1	0.721095
met37192	0.0224704	0.0247319	1673.8	0.908562	0.363712	1	0.722834
met53209	-0.0231781	0.0257935	1559.49	-0.898601	0.369004	1	0.731045
met46634	0.0386489	0.0431973	1365.76	0.894707	0.371102	1	0.732896
met34457	0.0541117	0.060679	1027.01	0.891769	0.372726	1	0.732955
met46443	0.0347265	0.0390077	1725.33	0.890246	0.373458	1	0.732955
met443	-0.0768015	0.0869378	1147.36	-0.883408	0.377201	1	0.738002
met42398	-0.0864281	0.098703	1312.41	-0.875638	0.381387	1	0.741586
met49228	0.0300769	0.0342687	1016.19	0.877677	0.380326	1	0.741586
met396	-0.026015	0.0298424	1249.32	-0.871745	0.383515	1	0.743429
met15716	0.0947052	0.11079	1812.34	0.854815	0.392767	1	0.759027
met53261	0.0341598	0.0407597	1189.4	0.838079	0.402155	1	0.763178
met3147	-0.0701274	0.0829221	1398.78	-0.845702	0.397863	1	0.763178
met46689	-0.0200187	0.0238835	1147.17	-0.838181	0.402104	1	0.763178
met47773	-0.0133277	0.015904	1273.3	-0.838009	0.402183	1	0.763178
met52769	-0.0810515	0.0967027	1386.09	-0.838152	0.40209	1	0.763178
met53127	-0.055759	0.0662355	1080.33	-0.841829	0.40007	1	0.763178
met15681	0.0305118	0.0365966	1347.81	0.833732	0.40458	1	0.764147
met33587	-0.044325	0.0532222	1112.16	-0.83283	0.405119	1	0.764147
met1126	0.127257	0.153725	1329.32	0.827826	0.407918	1	0.765371
met39837	-0.0411469	0.0497304	1058.64	-0.827399	0.408198	1	0.765371
met57461	0.0499323	0.0609696	1216.77	0.818971	0.412963	1	0.771809
met39732	0.0192621	0.023576	1167.43	0.817023	0.414082	1	0.771809
met48990	-0.106796	0.131526	1348.46	-0.811979	0.416947	1	0.774857
met38768	0.0229716	0.0284936	1150.11	0.806203	0.420292	1	0.775239
met18392	0.016181	0.0200946	1167.73	0.805242	0.420844	1	0.775239
met52525	0.0290771	0.0360544	1192.42	0.806479	0.420127	1	0.775239
met33422	0.0791812	0.0993879	1159.95	0.796689	0.425795	1	0.781137
met52286	0.0294056	0.0369676	1112.68	0.795443	0.426526	1	0.781137
met57814	-0.0288979	0.0378413	1147.37	-0.763661	0.445227	1	0.783691
met52611	0.0753643	0.096787	1696.65	0.778662	0.436288	1	0.783691
met57655	0.0340763	0.0452121	1049.74	0.753699	0.451199	1	0.783691
met17945	0.0797612	0.107587	1028.16	0.741367	0.45864	1	0.783691
met48442	-0.00454831	0.00609944	1065.13	-0.745693	0.456018	1	0.783691
met15685	0.034872	0.046499	1419.1	0.749952	0.453408	1	0.783691
met32198	0.0701426	0.0944464	1175.35	0.74267	0.45783	1	0.783691
met37202	0.0352255	0.045334	1763.65	0.777022	0.43725	1	0.783691
met37211	0.0325223	0.0415473	1742.44	0.782777	0.433864	1	0.783691
met61846	0.0233936	0.0302348	1683.66	0.773732	0.439198	1	0.783691
met1110	0.0599725	0.0780553	1164.75	0.768333	0.442445	1	0.783691
met43829	0.0513771	0.0686729	1206.18	0.748143	0.45452	1	0.783691
met57463	0.0308733	0.0393167	1162.97	0.785247	0.432468	1	0.783691
met54979	0.0681859	0.0920566	1515.76	0.740696	0.458993	1	0.783691
met43239	0.005294	0.00685763	992.185	0.771987	0.440306	1	0.783691
met61836	-0.0215637	0.0284982	1644.33	-0.756668	0.449357	1	0.783691
met61848	-0.0225352	0.0294612	1610.79	-0.764911	0.444437	1	0.783691
met57517	0.0772064	0.101608	1569.73	0.759848	0.44746	1	0.783691
met47651	-0.0226525	0.0299078	1823.05	-0.757413	0.4489	1	0.783691
met46982	-0.00896344	0.0120382	1166.74	-0.744582	0.456674	1	0.783691
met46997	0.0220216	0.0297315	1293.86	0.740684	0.459019	1	0.783691
met46473	-0.0478072	0.0639303	1403.58	-0.747802	0.454705	1	0.783691
met47000	0.0153902	0.0199285	1221.47	0.772269	0.440104	1	0.783691
met46261	0.0284854	0.0377535	1106.68	0.75451	0.450704	1	0.783691
met52881	0.0128735	0.017073	1131.23	0.754026	0.45099	1	0.783691
met52623	0.0577727	0.0786597	1292.15	0.734465	0.462799	1	0.788009
met34397	-0.0168332	0.0230174	1115.34	-0.731326	0.464734	1	0.789171
met36738	0.0389541	0.0534275	1078.38	0.729102	0.466098	1	0.789359
met47136	-0.00449333	0.00619743	991.612	-0.725032	0.468604	1	0.789359
met46683	0.0346861	0.0477513	1270.28	0.72639	0.467733	1	0.789359
met18467	0.031816	0.0443333	1450.08	0.717654	0.473086	1	0.792671
met34035	0.0355897	0.0494573	1125.91	0.719604	0.471918	1	0.792671
met1494	0.1289	0.180606	1491.77	0.713709	0.475519	1	0.793757
met52544	0.015215	0.021354	1532.55	0.712515	0.476254	1	0.793757
met52748	-0.0606759	0.0870879	1320.67	-0.69672	0.486101	1	0.803312
met38296	-0.0504783	0.0734708	1151.34	-0.687052	0.492188	1	0.803312
met43266	-0.0136228	0.0194811	1260.99	-0.699282	0.484505	1	0.803312
met47112	0.018413	0.0267576	1383.74	0.688139	0.49148	1	0.803312
met62061	-0.00592235	0.00860439	1000.94	-0.688293	0.491428	1	0.803312
met31932	-0.0203884	0.029431	1238.04	-0.692752	0.488595	1	0.803312
met53231	-0.0756229	0.109702	1366.92	-0.689347	0.490722	1	0.803312
met47909	0.0224675	0.0321856	1191.83	0.698061	0.485275	1	0.803312
met44664	0.0573598	0.0845075	1736.33	0.678754	0.497384	1	0.804051
met32377	-0.0692912	0.101337	1255.58	-0.68377	0.494247	1	0.804051
met46728	-0.0124267	0.0182668	1138.57	-0.680287	0.496461	1	0.804051
met46904	0.0180704	0.0266424	1138.08	0.678258	0.497746	1	0.804051
met48255	-0.0649877	0.0966867	1342.09	-0.672147	0.501606	1	0.806161
met46409	0.0307988	0.0458219	1323.09	0.672141	0.501611	1	0.806161
met47652	0.018083	0.0271464	1283.44	0.666129	0.505448	1	0.81026
met54841	0.0656532	0.0988984	1042.5	0.663845	0.506936	1	0.810583
met54805	-0.0561165	0.084826	1337.48	-0.661548	0.508375	1	0.810825
met32390	-0.0197584	0.0303428	1154.85	-0.651173	0.515065	1	0.812763
met1358	-0.0756202	0.115858	1127.09	-0.652695	0.514086	1	0.812763
met46707	0.0248685	0.0382787	1118.12	0.649669	0.51604	1	0.812763
met46516	0.0223057	0.0340069	1284.36	0.655918	0.511994	1	0.812763
met53266	-0.010181	0.0155932	1235.62	-0.65291	0.513936	1	0.812763
met48047	0.0180919	0.0281776	1174.78	0.642066	0.520956	1	0.818459
met33935	-0.0128325	0.0202056	1199.81	-0.635095	0.525487	1	0.819448
met42382	-0.0211172	0.0332457	1335.05	-0.635185	0.525416	1	0.819448
met1670	-0.0720851	0.113272	1298.09	-0.636388	0.524636	1	0.819448
met38637	0.00702645	0.0113031	1341.46	0.621638	0.534285	1	0.83111
met48153	-0.0814675	0.131938	1324.23	-0.617466	0.537033	1	0.83128
met52434	0.0937609	0.151838	1499.99	0.617507	0.536994	1	0.83128
met52871	0.0105317	0.0172103	1137.51	0.61194	0.5407	1	0.834904
met34214	0.0431441	0.0719873	1115.09	0.59933	0.549074	1	0.837571
met39598	0.0044303	0.00733899	1180.55	0.603666	0.546182	1	0.837571
met15140	0.0788709	0.131177	1442.48	0.601256	0.547764	1	0.837571
met57691	-0.0129673	0.0214977	1654.94	-0.603195	0.546462	1	0.837571
met46490	-0.0118868	0.0196171	1151.54	-0.60594	0.544674	1	0.837571
met35305	0.0166138	0.0283957	1107.22	0.585083	0.558611	1	0.839489
met39609	-0.0415052	0.0735482	1191.89	-0.564327	0.572638	1	0.839489
met62064	-0.0223263	0.0385933	1315.84	-0.578503	0.563023	1	0.839489
met63	0.0731365	0.128375	1360.89	0.569708	0.56897	1	0.839489
met38178	0.0373094	0.0652845	1459.24	0.57149	0.567755	1	0.839489
met61887	-0.00975961	0.0164737	1135.55	-0.592437	0.553676	1	0.839489
met62066	-0.011186	0.0197524	1293.29	-0.566312	0.57128	1	0.839489
met57370	0.06197	0.109921	1749.42	0.563767	0.572985	1	0.839489
met57330	0.0683697	0.120387	1369.32	0.567918	0.570184	1	0.839489
met46144	-0.00573911	0.00994687	1149.27	-0.576976	0.564068	1	0.839489
met33950	-0.039922	0.0682922	1454.29	-0.584576	0.558923	1	0.839489
met52944	0.0232735	0.0401435	1151.28	0.579757	0.562192	1	0.839489
met33969	0.0246745	0.0429201	1241.12	0.574893	0.565468	1	0.839489
met46618	0.0315453	0.0533712	1233.06	0.591056	0.554591	1	0.839489
met46294	-0.0107491	0.0185341	1441.21	-0.579963	0.56203	1	0.839489
met52867	0.012264	0.0212517	1449.47	0.577083	0.563973	1	0.839489
met57756	-0.00960987	0.016648	1172.94	-0.577238	0.56389	1	0.839489
met1584	0.00445815	0.00797261	1279.92	0.559183	0.576134	1	0.842145
met36845	0.003188	0.00576569	1128.7	0.552927	0.580423	1	0.84645
met48258	0.0738361	0.135485	1419.27	0.544976	0.585856	1	0.84707
met52468	-0.0478189	0.0873744	1448.88	-0.547287	0.584266	1	0.84707
met62101	-0.0670819	0.124102	1337.8	-0.540539	0.588916	1	0.84707
met32489	-0.0320113	0.0591088	1047.6	-0.541565	0.588233	1	0.84707
met46503	0.010536	0.0194841	1342.88	0.54075	0.588769	1	0.84707
met47016	0.00837393	0.0152874	1272.5	0.547768	0.583947	1	0.84707
met52790	0.011364	0.0211366	1140.1	0.537646	0.590926	1	0.848026
met43378	0.0221275	0.0413382	1098.05	0.53528	0.592564	1	0.848444
met46733	-0.0104122	0.0195265	1296.28	-0.533235	0.593962	1	0.848518
met38321	-0.021883	0.0415581	1504.06	-0.526564	0.598574	1	0.85021
met42092	0.0401369	0.0762504	1114.9	0.526382	0.598727	1	0.85021
met38102	-0.0300284	0.0575445	1096.59	-0.521829	0.601895	1	0.85021
met1604	0.0864414	0.164608	1663.23	0.525135	0.599559	1	0.85021
met46970	-0.0196328	0.0376129	1274.68	-0.52197	0.601782	1	0.85021
met47439	-0.0101066	0.0195446	1170.35	-0.517106	0.60518	1	0.852938
met52431	0.0112508	0.0220882	1142.09	0.509359	0.610599	1	0.856743
met46602	0.0233142	0.0456226	1288	0.511024	0.609422	1	0.856743
met37475	-0.00250925	0.0049855	1099.43	-0.503311	0.614847	1	0.857037
met57807	0.00997463	0.0198974	1197.49	0.501303	0.61625	1	0.857037
met1587	-0.0239732	0.0477618	1207.94	-0.501932	0.615807	1	0.857037
met1505	-0.0464153	0.0924322	1685.1	-0.502155	0.615624	1	0.857037
met33968	-0.0250413	0.0505534	1258.29	-0.495344	0.620444	1	0.859076
met52974	-0.00900774	0.0181724	1136.04	-0.495682	0.620214	1	0.859076
met54873	0.00988043	0.0200843	1230	0.491947	0.622845	1	0.860509
met33228	0.0524829	0.107473	1722.82	0.488335	0.625374	1	0.862114
met52450	-0.0267154	0.0557549	1282.44	-0.479157	0.631909	1	0.867325
met35675	0.0501798	0.104413	1035.86	0.48059	0.630909	1	0.867325
met37752	-0.0177225	0.0380839	1039.56	-0.465355	0.641775	1	0.877297
met61867	-0.0230585	0.0495808	1317.26	-0.46507	0.641958	1	0.877297
met53176	0.0132333	0.0295385	1118.48	0.448003	0.654238	1	0.892143
met49617	-0.035441	0.0842668	1323.87	-0.420581	0.674129	1	0.897911
met52690	0.0118461	0.0275159	1229.74	0.430516	0.666896	1	0.897911
met33230	0.0409363	0.0973384	1340.8	0.420557	0.674146	1	0.897911
met35631	-0.0402186	0.0947606	1317.94	-0.424423	0.671327	1	0.897911
met54809	-0.00582926	0.0136521	1062.65	-0.426986	0.669476	1	0.897911
met38125	-0.010386	0.0237733	1089.93	-0.436877	0.662287	1	0.897911
met32827	0.0117792	0.027713	1750.26	0.425045	0.670856	1	0.897911
met57518	0.035332	0.08152	1542.12	0.433415	0.664774	1	0.897911
met590	-0.0146203	0.0346187	1280.51	-0.422323	0.67286	1	0.897911
met46521	-0.00501984	0.0117	1010.4	-0.429048	0.66798	1	0.897911
met49637	-0.0392507	0.0929238	1131.9	-0.422397	0.672816	1	0.897911
met32504	0.0214593	0.0514304	1280.74	0.417249	0.676567	1	0.899234
met38168	0.0164561	0.040394	1830.79	0.407389	0.68377	1	0.904606
met57554	0.0517191	0.129829	1314.17	0.398363	0.690427	1	0.904606
met52984	-0.0218889	0.054059	1330.19	-0.404908	0.68561	1	0.904606
met46165	-0.00544693	0.0140084	1053.49	-0.388833	0.697478	1	0.904606
met61769	0.02546	0.0649156	1304.52	0.392202	0.694973	1	0.904606
met57741	0.0304573	0.0774423	1621.58	0.39329	0.694157	1	0.904606
met52234	0.0300292	0.0767754	1240.32	0.39113	0.695768	1	0.904606
met22185	0.0630521	0.162365	1165.22	0.388336	0.697839	1	0.904606
met57687	-0.0334366	0.0854565	1733.21	-0.39127	0.695645	1	0.904606
met1336	-0.0358818	0.0898088	1125.14	-0.399535	0.689575	1	0.904606
met38170	0.0128245	0.0329635	1665.95	0.389052	0.697287	1	0.904606
met52135	0.0277404	0.0693009	1106.51	0.400289	0.689021	1	0.904606
met36808	0.0531092	0.139305	1386.17	0.381245	0.70308	1	0.909529
met1645	-0.0223262	0.0598441	1243.47	-0.373072	0.709158	1	0.915512
met1600	0.0193893	0.0522895	1081.25	0.370806	0.710855	1	0.915825
met43761	-0.0194934	0.0529284	1137.62	-0.368298	0.71272	1	0.916354
met44621	-0.0137436	0.0397846	1245.84	-0.345451	0.729814	1	0.916647
met43343	-0.0168259	0.050155	1240.17	-0.335479	0.73732	1	0.916647
met43400	0.0110682	0.0308779	1235.38	0.358453	0.720066	1	0.916647
met46146	0.0117203	0.033534	1160.61	0.349505	0.726774	1	0.916647
met35101	-0.00191386	0.00557558	1075.69	-0.343257	0.731472	1	0.916647
met57636	0.0202345	0.0594624	1437.9	0.340291	0.733687	1	0.916647
met43802	0.0404668	0.11589	1515.57	0.349183	0.727	1	0.916647
met57417	-0.00951249	0.0282979	1274.72	-0.336155	0.736809	1	0.916647
met52634	0.010025	0.0293774	1223.83	0.34125	0.732974	1	0.916647
met57564	0.0221496	0.0617046	1738.73	0.358962	0.719667	1	0.916647
met34409	0.0338757	0.0965988	1351.83	0.350684	0.72588	1	0.916647
met46599	0.0143418	0.0428134	1549.67	0.334984	0.737683	1	0.916647
met47654	-0.00377315	0.0111586	1130.7	-0.338139	0.735321	1	0.916647
met47985	-0.00902298	0.0263335	1440.18	-0.342642	0.731917	1	0.916647
met46666	-0.00503	0.0146802	1229.05	-0.342638	0.731929	1	0.916647
met52640	-0.00748175	0.0218901	1194.05	-0.341788	0.732571	1	0.916647
met52835	-0.0136852	0.039868	1135.56	-0.343262	0.731465	1	0.916647
met32397	-0.0299278	0.0905175	1276.93	-0.33063	0.740978	1	0.91893
met1444	-0.0144758	0.0443865	1108.81	-0.32613	0.744388	1	0.921344
met53260	0.0113507	0.0355391	1114.8	0.319386	0.749494	1	0.925845
met46455	0.00460657	0.0145471	1211.81	0.316666	0.751552	1	0.926571
met46548	-0.0147586	0.0507734	1707.35	-0.290676	0.771334	1	0.939924
met1107	0.0442863	0.151466	1109.21	0.292384	0.770048	1	0.939924
met1498	-0.0201396	0.0677852	1105.66	-0.297109	0.766439	1	0.939924
met53223	-0.021722	0.0738122	1358.52	-0.294287	0.768583	1	0.939924
met49542	0.00872493	0.0292339	1368.94	0.298453	0.765403	1	0.939924
met52647	-0.00865998	0.0295065	1534.02	-0.293493	0.769185	1	0.939924
met52462	-0.0509153	0.179431	1647.04	-0.28376	0.77663	1	0.939942
met35637	-0.0130134	0.0464532	1472.88	-0.28014	0.779409	1	0.939942
met46331	-0.00277152	0.00978933	1092.38	-0.283117	0.777141	1	0.939942
met32415	-0.0180575	0.0631382	1129.23	-0.285999	0.774931	1	0.939942
met33447	-0.0125536	0.044526	1180.53	-0.281939	0.77804	1	0.939942
met42109	-0.0276013	0.0996238	1043.18	-0.277055	0.781793	1	0.939942
met46655	-0.00482196	0.0173972	1194.34	-0.277169	0.781698	1	0.939942
met32418	-0.0135153	0.0505463	1237.78	-0.267385	0.789217	1	0.947061
met48992	0.0116326	0.0440396	1274.53	0.264139	0.791715	1	0.948252
met1303	-0.0391576	0.151754	1449.54	-0.258034	0.796417	1	0.951383
met46905	-0.0106147	0.0413289	1228.67	-0.256834	0.79735	1	0.951383
met48569	0.00142932	0.00569828	1109.58	0.250834	0.801989	1	0.95249
met57658	0.00472847	0.0188006	1600.62	0.251506	0.801455	1	0.95249
met41726	0.00827026	0.0331144	1656.25	0.249748	0.802813	1	0.95249
met513	-0.0584503	0.241157	1658.92	-0.242374	0.80852	1	0.956141
met37432	-0.0126539	0.0523156	1001.38	-0.241876	0.808926	1	0.956141
met52454	-0.0434001	0.182573	1312.84	-0.237714	0.81214	1	0.958143
met36746	-0.0161963	0.0708167	1381.95	-0.228707	0.81913	1	0.960764
met33937	0.0169175	0.0735859	1638.87	0.229901	0.818198	1	0.960764
met57513	0.0142639	0.0621619	1296.56	0.229464	0.818545	1	0.960764
met52524	0.0106727	0.0470191	1643.47	0.226988	0.820462	1	0.960764
met33971	-0.0114169	0.0510727	1148.73	-0.223543	0.823153	1	0.962126
met17805	0.0120924	0.0556422	1106.88	0.217324	0.827996	1	0.962431
met48351	0.0190178	0.0873595	1395.34	0.217696	0.827698	1	0.962431
met46621	0.013808	0.0629224	1687.72	0.219444	0.82633	1	0.962431
met52710	-0.0226973	0.106077	1155.57	-0.213971	0.830608	1	0.963688
met48994	-0.00557442	0.0266609	1085.52	-0.209086	0.83442	1	0.966332
met18245	-0.0234305	0.118977	1180.65	-0.196932	0.843914	1	0.971023
met57652	0.0097754	0.0508728	1144.5	0.192154	0.847656	1	0.971023
met27710	-0.011908	0.0615881	1417.57	-0.193349	0.846713	1	0.971023
met17769	-0.00670343	0.0348983	1486.05	-0.192085	0.847702	1	0.971023
met46595	-0.00515973	0.0268633	1160.83	-0.192073	0.847719	1	0.971023
met46639	-0.00331236	0.0164981	1357.56	-0.200773	0.840907	1	0.971023
met1549	-0.0117911	0.0634378	1160.02	-0.185868	0.852581	1	0.971743
met32445	0.00187078	0.0120357	1060.83	0.155436	0.876507	1	0.971743
met61833	0.0249376	0.144242	1591.8	0.172887	0.862762	1	0.971743
met62103	-0.0142696	0.089693	954.398	-0.159094	0.873629	1	0.971743
met48728	0.00135356	0.00807167	999.207	0.167692	0.866859	1	0.971743
met22163	0.0160387	0.0857658	773.563	0.187006	0.851705	1	0.971743
met57519	0.0125016	0.0789586	1300.52	0.158332	0.87422	1	0.971743
met48152	-0.0364211	0.23484	1334.35	-0.155089	0.876774	1	0.971743
met527	0.0196462	0.106516	1350.15	0.184443	0.853693	1	0.971743
met57407	0.00312258	0.0184717	1361.94	0.169047	0.865785	1	0.971743
met48434	-0.00439993	0.0242083	1561.88	-0.181753	0.8558	1	0.971743
met48757	-0.00418817	0.0243714	1344.27	-0.171848	0.863583	1	0.971743
met1361	-0.0153761	0.0871886	1121.17	-0.176354	0.860047	1	0.971743
met1806	-0.0235998	0.141825	1610.16	-0.166401	0.867862	1	0.971743
met46459	-0.00261024	0.0163004	1101.81	-0.160133	0.872805	1	0.971743
met47787	0.00428396	0.0281798	1147.72	0.152022	0.879196	1	0.971743
met47988	-0.00398174	0.0246951	1165.31	-0.161236	0.871936	1	0.971743
met40097	-0.0230242	0.134207	1464.17	-0.171557	0.863809	1	0.971743
met46515	-0.0040947	0.0265961	1485.73	-0.153959	0.877663	1	0.971743
met46519	0.00300583	0.0169849	1111.01	0.176971	0.859563	1	0.971743
met36594	-0.00918254	0.0639361	1161.49	-0.143621	0.885825	1	0.972767
met35114	-0.02461	0.175539	1470.78	-0.140196	0.888524	1	0.972767
met52983	-0.00335087	0.0240582	1307.83	-0.139282	0.889249	1	0.972767
met33936	-0.00826757	0.0574222	1530.76	-0.143979	0.885536	1	0.972767
met46616	0.00662963	0.0476585	1302.07	0.139107	0.889387	1	0.972767
met46701	-0.00838133	0.0571679	1616.31	-0.146609	0.883459	1	0.972767
met52449	0.0130909	0.0989075	1352.79	0.132355	0.894723	1	0.975217
met42087	0.00339473	0.025595	1480.61	0.132632	0.894502	1	0.975217
met18477	-0.002062	0.0158923	1228.7	-0.129748	0.896787	1	0.975779
met37063	0.00530242	0.0415385	1012.27	0.127651	0.898451	1	0.975903
met3141	0.0180142	0.14685	1388.71	0.122671	0.902386	1	0.977837
met40473	-0.00604971	0.0501229	1286.56	-0.120698	0.903949	1	0.977837
met46600	-0.00249406	0.020868	1129.34	-0.119516	0.904888	1	0.977837
met45951	-0.00644981	0.0568033	1247.18	-0.113546	0.909616	1	0.981263
met52713	-0.0127387	0.122248	1779.2	-0.104204	0.91702	1	0.982521
met33972	0.00552668	0.0517139	1084.72	0.10687	0.914912	1	0.982521
met33941	0.0056306	0.0531486	1418.43	0.105941	0.915644	1	0.982521
met54968	0.00428983	0.039054	1162.2	0.109843	0.912553	1	0.982521
met31912	-0.00207531	0.0209322	1216.75	-0.099144	0.92104	1	0.982956
met52285	-0.00624528	0.0651641	1072.66	-0.0958392	0.923666	1	0.982956
met47642	0.00463452	0.0478347	1378.65	0.0968861	0.922831	1	0.982956
met49517	0.00201167	0.0208732	1328.52	0.0963757	0.923237	1	0.982956
met42450	-0.0178939	0.197098	1727.12	-0.0907872	0.927672	1	0.984037
met35527	-0.00283528	0.0386019	1172.28	-0.0734493	0.941461	1	0.984037
met57528	0.00232151	0.0295519	1356.82	0.0785569	0.937397	1	0.984037
met12129	0.00648387	0.0913493	1242.65	0.0709789	0.943426	1	0.984037
met35718	-0.0059425	0.0740029	1148.4	-0.0803009	0.936012	1	0.984037
met40481	-0.000420083	0.00557743	1074.74	-0.0753184	0.939975	1	0.984037
met35127	0.00601674	0.0776681	1434.42	0.0774674	0.938263	1	0.984037
met18494	0.0015864	0.0182514	1226.84	0.0869193	0.93075	1	0.984037
met27738	-0.00444435	0.060749	1205.28	-0.0731593	0.941692	1	0.984037
met605	-0.00281578	0.0359088	1090.42	-0.0784148	0.937513	1	0.984037
met46610	0.00146422	0.0203763	1114.19	0.071859	0.942727	1	0.984037
met52788	0.0188656	0.223834	1455.65	0.084284	0.932842	1	0.984037
met44656	0.00221833	0.0365908	1036.38	0.0606253	0.951669	1	0.989359
met36850	-0.0015828	0.0257319	1217.14	-0.0615113	0.950962	1	0.989359
met1432	-0.00129157	0.0259735	1022.87	-0.0497263	0.96035	1	0.993019
met53262	0.00108156	0.0242146	1112.73	0.0446655	0.964382	1	0.993019
met39831	0.00240854	0.0543279	1089.26	0.0443334	0.964647	1	0.993019
met44681	-0.00553415	0.113614	1367.91	-0.0487101	0.961157	1	0.993019
met22130	0.00461874	0.0979608	1495.62	0.0471488	0.962401	1	0.993019
met47901	-0.000842685	0.0168468	1131.67	-0.0500205	0.960115	1	0.993019
met52478	-0.00508089	0.133791	1784.31	-0.0379763	0.969711	1	0.994201
met57422	-0.00194459	0.0555371	1207.01	-0.0350142	0.972074	1	0.994201
met1105	0.002622	0.0650978	1114.34	0.0402778	0.967879	1	0.994201
met32562	-0.00154214	0.0467434	1616.54	-0.0329917	0.973685	1	0.994201
met49681	0.00207471	0.0622617	1304.78	0.0333224	0.973423	1	0.994201
met52475	0.00169098	0.0856231	1389.92	0.0197492	0.984246	1	0.99469
met53195	0.00129779	0.0638512	1341.51	0.0203252	0.983787	1	0.99469
met52467	0.000793833	0.0560508	1211.74	0.0141627	0.988702	1	0.99469
met48782	0.00250006	0.101598	1155.82	0.0246073	0.980372	1	0.99469
met53258	0.000270771	0.0214987	1182.94	0.0125948	0.989953	1	0.99469
met43493	-0.000751302	0.0356872	1220.22	-0.0210524	0.983207	1	0.99469
met57	-0.00104296	0.0694259	1366.23	-0.0150227	0.988016	1	0.99469
met1121	-0.00119369	0.065333	1086.04	-0.0182709	0.985426	1	0.99469
met1365	-0.00093593	0.0596507	1149.69	-0.0156902	0.987484	1	0.99469
met18335	0.000370157	0.0171447	1653.6	0.0215901	0.982778	1	0.99469
met46628	-0.000273542	0.0264285	1208.77	-0.0103503	0.991744	1	0.994902
met52616	-5.01817e-05	0.0879333	1196.89	-0.00057068	0.999545	1	0.999545
met566	0.000126968	0.0521095	1123.45	0.00243657	0.998056	1	0.999545
